# Supplementary material
Source: publisher figshare collection journal article supplement (https://acs.figshare.com/ndownloader/files/5935260)
Supplement: Supplementary file 1 [file 5935260]

data_global
_audit_creation_method                  'APEX2 v2014.5-0'

_publ_requested_journal                 ?

_publ_contact_author_name               ?
_publ_contact_author_address            
;
;
_publ_contact_author_email              ?
_publ_contact_author_fax                ?
_publ_contact_author_phone              ?

_publ_section_title                     
;
;
_publ_section_abstract                  
;
;
_publ_section_references                
;
;
_publ_section_comment                   
;
;

data_I
_chemical_name_systematic               ?
_chemical_name_common                   ?
_chemical_formula_moiety                ?
_chemical_formula_sum                   'C144 H300 Pt6 S12'
_chemical_formula_iupac                 ?
_chemical_formula_weight                3587.08

_chemical_melting_point                 ?

_space_group_crystal_system             triclinic
_space_group_name_H-M_alt               'P -1'
_space_group_name_Hall                  '-P 1'
loop_
    _space_group_symop_operation_xyz
    'x, y, z'
    '-x, -y, -z'

_cell_length_a                          11.7859(5)
_cell_length_b                          17.5279(8)
_cell_length_c                          20.5802(9)
_cell_angle_alpha                       103.3100(6)
_cell_angle_beta                        95.3031(6)
_cell_angle_gamma                       105.3102(6)
_cell_volume                            3936.9(3)
_cell_formula_units_Z                   1
_cell_measurement_reflns_used           147
_cell_measurement_theta_min             3.5632
_cell_measurement_theta_max             25.4963
_cell_measurement_temperature           90.0(2)

_exptl_crystal_description              block
_exptl_crystal_colour                   yellow
_exptl_crystal_size_max                 0.220
_exptl_crystal_size_mid                 0.160
_exptl_crystal_size_min                 0.150
_exptl_crystal_density_diffrn           1.513
_exptl_crystal_density_meas             ?
_exptl_crystal_density_method           'not measured'
_exptl_crystal_F_000                    1824

_exptl_absorpt_coefficient_mu           5.513
_exptl_absorpt_correction_type          multi-scan
_exptl_absorpt_process_details          'SADABS V2014/2 (Bruker AXS Inc.)'
_exptl_absorpt_correction_T_min         0.44
_exptl_absorpt_correction_T_max         0.49

_exptl_special_details                  
;
; 

_diffrn_ambient_temperature             90.0(2)

_diffrn_source                          'sealed tube'
_diffrn_source_type                     ?

_diffrn_radiation_type                  'Mo K\a'
_diffrn_radiation_wavelength            0.71073
_diffrn_radiation_monochromator         graphite

_diffrn_measurement_device_type         'Bruker D8 goniometer'
_diffrn_measurement_method              'omega scans'

_diffrn_detector_area_resol_mean        8.3333

_diffrn_reflns_number                   19713
_diffrn_reflns_av_R_equivalents         0.0172
_diffrn_reflns_av_unetI/netI            0.0410
_diffrn_reflns_theta_min                1.03
_diffrn_reflns_theta_max                25.35
_diffrn_reflns_theta_full               25.35
_diffrn_measured_fraction_theta_max     0.983
_diffrn_measured_fraction_theta_full    0.983
_diffrn_reflns_limit_h_min              -12
_diffrn_reflns_limit_h_max              14
_diffrn_reflns_limit_k_min              -21
_diffrn_reflns_limit_k_max              18
_diffrn_reflns_limit_l_min              -23
_diffrn_reflns_limit_l_max              24

_refine_special_details                 
;
;

_reflns_number_total                    14189
_reflns_number_gt                       12166
_reflns_threshold_expression            'I > 2\s(I)'

_refine_ls_structure_factor_coef        Fsqd
_refine_ls_matrix_type                  full
_refine_ls_R_factor_all                 0.0421
_refine_ls_R_factor_gt                  0.0298
_refine_ls_wR_factor_gt                 0.0731
_refine_ls_wR_factor_ref                0.0936
_refine_ls_goodness_of_fit_ref          1.089
_refine_ls_restrained_S_all             1.089
_refine_ls_number_reflns                14189
_refine_ls_number_parameters            736
_refine_ls_number_restraints            0
_refine_ls_number_constraints           ?
_refine_ls_hydrogen_treatment           mixed
_refine_ls_weighting_scheme             calc
_refine_ls_weighting_details            
    'w=1/[\s^2^(Fo^2^)+(0.0551P)^2^] where P=(Fo^2^+2Fc^2^)/3'

_atom_sites_solution_hydrogens          mixed
_atom_sites_solution_primary            ?
_atom_sites_solution_secondary          ?

_refine_ls_shift/su_max                 0.002
_refine_ls_shift/su_mean                0.000
_refine_diff_density_max                1.545
_refine_diff_density_min                -2.260
_refine_ls_extinction_method            none
_refine_ls_extinction_coef              ?

loop_
    _atom_type_symbol
    _atom_type_description
    _atom_type_scat_dispersion_real
    _atom_type_scat_dispersion_imag
    _atom_type_scat_source
    C C 0.0033 0.0016 'International Tables Vol C Tables 4.2.6.8 and 6.1.1.4'
    H H 0.0000 0.0000 'International Tables Vol C Tables 4.2.6.8 and 6.1.1.4'
    S S 0.1246 0.1234 'International Tables Vol C Tables 4.2.6.8 and 6.1.1.4'
    Pt Pt -1.7033 8.3905
     'International Tables Vol C Tables 4.2.6.8 and 6.1.1.4'

_computing_data_collection              'Bruker SMART APEXII'
_computing_cell_refinement              'APEX2 v2014.5-0 (Bruker AXS)'
_computing_data_reduction               'SAINT V8.34A (Bruker AXS Inc., 2013)'
_computing_structure_solution           'SHELXS-2013 (Sheldrick, 2013)'
_computing_structure_refinement         'SHELXL-2014 (Sheldrick, 2014)'
_computing_molecular_graphics           'XSHELL V6.3.1 (BruekrAXS)'
_computing_publication_material         'Generate Report (Bruker AXS)'

loop_
    _atom_site_type_symbol
    _atom_site_label
    _atom_site_fract_x
    _atom_site_fract_y
    _atom_site_fract_z
    _atom_site_U_iso_or_equiv
    _atom_site_adp_type
    _atom_site_calc_flag
    _atom_site_refinement_flags_adp
    _atom_site_refinement_flags_occupancy
    _atom_site_refinement_flags_posn
    _atom_site_occupancy
    _atom_site_disorder_assembly
    _atom_site_disorder_group
    Pt Pt1 0.28679(2) 0.02197(2) 0.40873(2) 0.01413(7) Uani d . . . 1 . .
    Pt Pt2 0.51437(2) 0.01713(2) 0.34658(2) 0.01435(7) Uani d . . . 1 . .
    Pt Pt3 0.72983(2) -0.00538(2) 0.43912(2) 0.01476(7) Uani d . . . 1 . .
    S S1 0.31632(13) -0.05955(8) 0.30975(7) 0.0162(3) Uani d . . . 1 . .
    S S2 0.42364(13) 0.12004(8) 0.37442(7) 0.0152(3) Uani d . . . 1 . .
    S S3 0.70904(13) 0.09799(8) 0.38987(7) 0.0171(3) Uani d . . . 1 . .
    S S4 0.60167(13) -0.08787(8) 0.34083(7) 0.0170(3) Uani d . . . 1 . .
    S S5 0.73995(13) -0.10683(8) 0.49278(7) 0.0163(3) Uani d . . . 1 . .
    S S6 0.81994(13) 0.07849(8) 0.54598(7) 0.0156(3) Uani d . . . 1 . .
    C C1A 0.2893(6) -0.1664(3) 0.3117(3) 0.0208(13) Uani d . . . 1 . .
    H H1A1 0.3656 -0.176 0.3264 0.025 Uiso calc U . R 1 . .
    H H1A2 0.2354 -0.1785 0.3445 0.025 Uiso calc U . R 1 . .
    C C2A 0.2339(6) -0.2219(3) 0.2425(3) 0.0249(14) Uani d . . . 1 . .
    H H2A1 0.2903 -0.2108 0.2106 0.03 Uiso calc U . R 1 . .
    H H2A2 0.161 -0.2088 0.2271 0.03 Uiso calc U . R 1 . .
    C C3A 0.2012(5) -0.3132(3) 0.2396(3) 0.0203(13) Uani d . . . 1 . .
    H H3A1 0.2749 -0.3279 0.2504 0.024 Uiso calc U . R 1 . .
    H H3A2 0.1509 -0.3237 0.2745 0.024 Uiso calc U . R 1 . .
    C C4A 0.1347(6) -0.3674(3) 0.1709(3) 0.0236(14) Uani d . . . 1 . .
    H H4A1 0.1853 -0.3567 0.1362 0.028 Uiso calc U . R 1 . .
    H H4A2 0.0615 -0.3522 0.1601 0.028 Uiso calc U . R 1 . .
    C C5A 0.1002(6) -0.4589(3) 0.1663(3) 0.0220(14) Uani d . . . 1 . .
    H H5A1 0.1736 -0.4746 0.1755 0.026 Uiso calc U . R 1 . .
    H H5A2 0.0516 -0.4695 0.2018 0.026 Uiso calc U . R 1 . .
    C C6A 0.0303(6) -0.5125(3) 0.0978(3) 0.0222(14) Uani d . . . 1 . .
    H H6A1 -0.0426 -0.4963 0.0885 0.027 Uiso calc U . R 1 . .
    H H6A2 0.0793 -0.502 0.0624 0.027 Uiso calc U . R 1 . .
    C C7A -0.0054(6) -0.6035(3) 0.0925(3) 0.0221(14) Uani d . . . 1 . .
    H H7A1 -0.0527 -0.6138 0.1286 0.027 Uiso calc U . R 1 . .
    H H7A2 0.0676 -0.62 0.1007 0.027 Uiso calc U . R 1 . .
    C C8A -0.0777(6) -0.6569(4) 0.0248(3) 0.0250(14) Uani d . . . 1 . .
    H H8A1 -0.0304 -0.647 -0.0114 0.03 Uiso calc U . R 1 . .
    H H8A2 -0.1507 -0.6404 0.0164 0.03 Uiso calc U . R 1 . .
    C C9A -0.1137(6) -0.7483(4) 0.0204(3) 0.0241(14) Uani d . . . 1 . .
    H H9A1 -0.1581 -0.7577 0.0577 0.029 Uiso calc U . R 1 . .
    H H9A2 -0.0406 -0.7651 0.0271 0.029 Uiso calc U . R 1 . .
    C C10A -0.1904(6) -0.8026(4) -0.0464(3) 0.0248(14) Uani d . . . 1 . .
    H H10A -0.2624 -0.7848 -0.0537 0.03 Uiso calc U . R 1 . .
    H H10B -0.1451 -0.7944 -0.0836 0.03 Uiso calc U . R 1 . .
    C C11A -0.2288(6) -0.8931(4) -0.0498(3) 0.0304(16) Uani d . . . 1 . .
    H H11A -0.2722 -0.9013 -0.0119 0.036 Uiso calc U . R 1 . .
    H H11B -0.157 -0.9116 -0.0441 0.036 Uiso calc U . R 1 . .
    C C12A -0.3086(7) -0.9461(4) -0.1163(3) 0.0389(18) Uani d . . . 1 . .
    H H12A -0.3826 -0.9308 -0.1209 0.058 Uiso calc U . R 1 . .
    H H12B -0.3274 -1.004 -0.1164 0.058 Uiso calc U . R 1 . .
    H H12C -0.267 -0.9373 -0.1543 0.058 Uiso calc U . R 1 . .
    C C1B 0.3565(5) 0.1363(4) 0.2967(3) 0.0180(12) Uani d . . . 1 . .
    H H1B1 0.3071 0.0829 0.2664 0.022 Uiso calc U . R 1 . .
    H H1B2 0.3039 0.1714 0.308 0.022 Uiso calc U . R 1 . .
    C C2B 0.4513(6) 0.1767(4) 0.2603(3) 0.0247(14) Uani d . . . 1 . .
    H H2B1 0.412 0.1957 0.2251 0.03 Uiso calc U . R 1 . .
    H H2B2 0.486 0.1345 0.2367 0.03 Uiso calc U . R 1 . .
    C C3B 0.5541(6) 0.2498(4) 0.3041(3) 0.0272(15) Uani d . . . 1 . .
    H H3B1 0.6052 0.228 0.3313 0.033 Uiso calc U . R 1 . .
    H H3B2 0.6029 0.2745 0.2734 0.033 Uiso calc U . R 1 . .
    C C4B 0.5222(6) 0.3182(4) 0.3523(3) 0.0264(15) Uani d . . . 1 . .
    H H4B1 0.484 0.2968 0.3879 0.032 Uiso calc U . R 1 . .
    H H4B2 0.4643 0.3372 0.327 0.032 Uiso calc U . R 1 . .
    C C5B 0.6335(6) 0.3908(4) 0.3852(3) 0.0288(15) Uani d . . . 1 . .
    H H5B1 0.6936 0.3694 0.4059 0.035 Uiso calc U . R 1 . .
    H H5B2 0.667 0.4136 0.349 0.035 Uiso calc U . R 1 . .
    C C6B 0.6165(6) 0.4603(4) 0.4389(3) 0.0301(16) Uani d . . . 1 . .
    H H6B1 0.5898 0.4394 0.4774 0.036 Uiso calc U . R 1 . .
    H H6B2 0.553 0.4801 0.4198 0.036 Uiso calc U . R 1 . .
    C C7B 0.7298(6) 0.5320(4) 0.4648(3) 0.0258(14) Uani d . . . 1 . .
    H H7B1 0.7932 0.511 0.4823 0.031 Uiso calc U . R 1 . .
    H H7B2 0.7551 0.5525 0.4259 0.031 Uiso calc U . R 1 . .
    C C8B 0.7217(6) 0.6039(4) 0.5197(3) 0.0302(15) Uani d . . . 1 . .
    H H8B1 0.7012 0.5849 0.56 0.036 Uiso calc U . R 1 . .
    H H8B2 0.6568 0.6244 0.5034 0.036 Uiso calc U . R 1 . .
    C C9B 0.8375(6) 0.6740(4) 0.5399(3) 0.0267(15) Uani d . . . 1 . .
    H H9B1 0.9018 0.6528 0.5559 0.032 Uiso calc U . R 1 . .
    H H9B2 0.8578 0.6918 0.4991 0.032 Uiso calc U . R 1 . .
    C C10B 0.8362(6) 0.7487(4) 0.5945(3) 0.0250(14) Uani d . . . 1 . .
    H H10C 0.7704 0.7693 0.5795 0.03 Uiso calc U . R 1 . .
    H H10D 0.8194 0.7318 0.6362 0.03 Uiso calc U . R 1 . .
    C C11B 0.9521(6) 0.8182(4) 0.6112(3) 0.0300(15) Uani d . . . 1 . .
    H H11C 1.0177 0.7969 0.6251 0.036 Uiso calc U . R 1 . .
    H H11D 0.9678 0.8352 0.5694 0.036 Uiso calc U . R 1 . .
    C C12B 0.9558(6) 0.8932(4) 0.6660(4) 0.0359(17) Uani d . . . 1 . .
    H H12D 0.8954 0.9177 0.6516 0.054 Uiso calc U . R 1 . .
    H H12E 1.0349 0.9332 0.6745 0.054 Uiso calc U . R 1 . .
    H H12F 0.9394 0.8774 0.7077 0.054 Uiso calc U . R 1 . .
    C C1C 0.6993(5) 0.1831(3) 0.4578(3) 0.0211(13) Uani d . . . 1 . .
    H H1C1 0.6374 0.2061 0.4414 0.025 Uiso calc U . R 1 . .
    H H1C2 0.6739 0.1619 0.4964 0.025 Uiso calc U . R 1 . .
    C C2C 0.8159(5) 0.2513(3) 0.4824(3) 0.0173(12) Uani d . . . 1 . .
    H H2C1 0.8785 0.2289 0.4989 0.021 Uiso calc U . R 1 . .
    H H2C2 0.8411 0.2738 0.4444 0.021 Uiso calc U . R 1 . .
    C C3C 0.8029(5) 0.3192(3) 0.5389(3) 0.0215(13) Uani d . . . 1 . .
    H H3C1 0.7858 0.2974 0.5784 0.026 Uiso calc U . R 1 . .
    H H3C2 0.7337 0.3365 0.5238 0.026 Uiso calc U . R 1 . .
    C C4C 0.9124(5) 0.3942(3) 0.5611(3) 0.0213(13) Uani d . . . 1 . .
    H H4C1 0.9811 0.3774 0.5777 0.026 Uiso calc U . R 1 . .
    H H4C2 0.9313 0.415 0.5213 0.026 Uiso calc U . R 1 . .
    C C5C 0.8975(5) 0.4635(3) 0.6163(3) 0.0227(14) Uani d . . . 1 . .
    H H5C1 0.8793 0.443 0.6563 0.027 Uiso calc U . R 1 . .
    H H5C2 0.8288 0.4803 0.5999 0.027 Uiso calc U . R 1 . .
    C C6C 1.0076(6) 0.5379(3) 0.6375(3) 0.0228(14) Uani d . . . 1 . .
    H H6C1 1.0758 0.5208 0.6543 0.027 Uiso calc U . R 1 . .
    H H6C2 1.0264 0.5573 0.5971 0.027 Uiso calc U . R 1 . .
    C C7C 0.9957(6) 0.6087(4) 0.6914(3) 0.0240(14) Uani d . . . 1 . .
    H H7C1 0.9772 0.5899 0.7321 0.029 Uiso calc U . R 1 . .
    H H7C2 0.928 0.6265 0.6748 0.029 Uiso calc U . R 1 . .
    C C8C 1.1075(6) 0.6815(3) 0.7112(3) 0.0237(14) Uani d . . . 1 . .
    H H8C1 1.1744 0.6633 0.7283 0.028 Uiso calc U . R 1 . .
    H H8C2 1.1267 0.6988 0.67 0.028 Uiso calc U . R 1 . .
    C C9C 1.1002(6) 0.7553(4) 0.7642(3) 0.0283(15) Uani d . . . 1 . .
    H H9C1 1.0786 0.7383 0.8052 0.034 Uiso calc U . R 1 . .
    H H9C2 1.0364 0.7759 0.7466 0.034 Uiso calc U . R 1 . .
    C C10C 1.2177(6) 0.8244(4) 0.7833(3) 0.0287(15) Uani d . . . 1 . .
    H H10E 1.2799 0.804 0.803 0.034 Uiso calc U . R 1 . .
    H H10F 1.2414 0.8381 0.7415 0.034 Uiso calc U . R 1 . .
    C C11C 1.2154(7) 0.9019(4) 0.8327(4) 0.0393(18) Uani d . . . 1 . .
    H H11E 1.1846 0.8882 0.8731 0.047 Uiso calc U . R 1 . .
    H H11F 1.1599 0.9263 0.8115 0.047 Uiso calc U . R 1 . .
    C C12C 1.3368(8) 0.9644(4) 0.8549(4) 0.054(2) Uani d . . . 1 . .
    H H12G 1.387 0.9455 0.8844 0.081 Uiso calc U . R 1 . .
    H H12H 1.3284 1.017 0.8795 0.081 Uiso calc U . R 1 . .
    H H12I 1.3737 0.9711 0.815 0.081 Uiso calc U . R 1 . .
    C C1D 0.6837(5) -0.0906(4) 0.2694(3) 0.0200(13) Uani d . . . 1 . .
    H H1D1 0.7159 -0.0343 0.2649 0.024 Uiso calc U . R 1 . .
    H H1D2 0.7517 -0.1121 0.2782 0.024 Uiso calc U . R 1 . .
    C C2D 0.6026(5) -0.1451(4) 0.2033(3) 0.0205(13) Uani d . . . 1 . .
    H H2D1 0.5322 -0.1254 0.1969 0.025 Uiso calc U . R 1 . .
    H H2D2 0.6464 -0.1386 0.1652 0.025 Uiso calc U . R 1 . .
    C C3D 0.5598(6) -0.2356(4) 0.2000(3) 0.0227(14) Uani d . . . 1 . .
    H H3D1 0.5088 -0.2431 0.235 0.027 Uiso calc U . R 1 . .
    H H3D2 0.6296 -0.2545 0.2106 0.027 Uiso calc U . R 1 . .
    C C4D 0.4900(6) -0.2882(3) 0.1316(3) 0.0213(13) Uani d . . . 1 . .
    H H4D1 0.5398 -0.2785 0.0964 0.026 Uiso calc U . R 1 . .
    H H4D2 0.4184 -0.2707 0.122 0.026 Uiso calc U . R 1 . .
    C C5D 0.4509(6) -0.3797(4) 0.1263(3) 0.0223(14) Uani d . . . 1 . .
    H H5D1 0.3994 -0.3896 0.1608 0.027 Uiso calc U . R 1 . .
    H H5D2 0.5223 -0.397 0.1369 0.027 Uiso calc U . R 1 . .
    C C6D 0.3832(6) -0.4323(4) 0.0569(3) 0.0237(14) Uani d . . . 1 . .
    H H6D1 0.4344 -0.4221 0.0225 0.028 Uiso calc U . R 1 . .
    H H6D2 0.3115 -0.4153 0.0465 0.028 Uiso calc U . R 1 . .
    C C7D 0.3447(6) -0.5244(4) 0.0514(3) 0.0236(14) Uani d . . . 1 . .
    H H7D1 0.4164 -0.5413 0.0621 0.028 Uiso calc U . R 1 . .
    H H7D2 0.2932 -0.5346 0.0858 0.028 Uiso calc U . R 1 . .
    C C8D 0.2776(6) -0.5772(4) -0.0179(3) 0.0244(14) Uani d . . . 1 . .
    H H8D1 0.3293 -0.567 -0.0521 0.029 Uiso calc U . R 1 . .
    H H8D2 0.2062 -0.5598 -0.0286 0.029 Uiso calc U . R 1 . .
    C C9D 0.2381(6) -0.6692(4) -0.0237(3) 0.0244(14) Uani d . . . 1 . .
    H H9D1 0.3095 -0.6865 -0.0131 0.029 Uiso calc U . R 1 . .
    H H9D2 0.1867 -0.6793 0.0107 0.029 Uiso calc U . R 1 . .
    C C10D 0.1711(6) -0.7217(4) -0.0923(3) 0.0248(14) Uani d . . . 1 . .
    H H10G 0.2215 -0.7099 -0.1268 0.03 Uiso calc U . R 1 . .
    H H10H 0.0983 -0.7055 -0.1021 0.03 Uiso calc U . R 1 . .
    C C11D 0.1347(7) -0.8136(4) -0.0999(3) 0.0306(16) Uani d . . . 1 . .
    H H11G 0.207 -0.8303 -0.0899 0.037 Uiso calc U . R 1 . .
    H H11H 0.0829 -0.826 -0.0661 0.037 Uiso calc U . R 1 . .
    C C12D 0.0688(7) -0.8640(4) -0.1700(3) 0.0349(17) Uani d . . . 1 . .
    H H12J -0.0079 -0.853 -0.178 0.052 Uiso calc U . R 1 . .
    H H12K 0.0551 -0.9225 -0.1731 0.052 Uiso calc U . R 1 . .
    H H12L 0.1169 -0.849 -0.2041 0.052 Uiso calc U . R 1 . .
    C C1E 0.6038(5) -0.1927(3) 0.4616(3) 0.0198(13) Uani d . . . 1 . .
    H H1E1 0.5798 -0.2161 0.4994 0.024 Uiso calc U . R 1 . .
    H H1E2 0.539 -0.1723 0.4451 0.024 Uiso calc U . R 1 . .
    C C2E 0.6198(5) -0.2594(3) 0.4049(3) 0.0202(13) Uani d . . . 1 . .
    H H2E1 0.685 -0.2798 0.4211 0.024 Uiso calc U . R 1 . .
    H H2E2 0.6428 -0.2364 0.3667 0.024 Uiso calc U . R 1 . .
    C C3E 0.5062(5) -0.3302(4) 0.3804(3) 0.0225(14) Uani d . . . 1 . .
    H H3E1 0.4419 -0.3094 0.3639 0.027 Uiso calc U . R 1 . .
    H H3E2 0.4827 -0.3517 0.4192 0.027 Uiso calc U . R 1 . .
    C C4E 0.5165(6) -0.4006(3) 0.3240(3) 0.0209(13) Uani d . . . 1 . .
    H H4E1 0.5364 -0.3799 0.2844 0.025 Uiso calc U . R 1 . .
    H H4E2 0.5829 -0.4202 0.3398 0.025 Uiso calc U . R 1 . .
    C C5E 0.4033(5) -0.4726(4) 0.3021(3) 0.0231(14) Uani d . . . 1 . .
    H H5E1 0.3838 -0.4935 0.3418 0.028 Uiso calc U . R 1 . .
    H H5E2 0.3368 -0.4528 0.2869 0.028 Uiso calc U . R 1 . .
    C C6E 0.4123(6) -0.5426(3) 0.2458(3) 0.0247(14) Uani d . . . 1 . .
    H H6E1 0.4807 -0.5609 0.2604 0.03 Uiso calc U . R 1 . .
    H H6E2 0.4288 -0.5221 0.2056 0.03 Uiso calc U . R 1 . .
    C C7E 0.3005(6) -0.6161(3) 0.2254(3) 0.0234(14) Uani d . . . 1 . .
    H H7E1 0.2848 -0.6376 0.2652 0.028 Uiso calc U . R 1 . .
    H H7E2 0.2316 -0.5978 0.2116 0.028 Uiso calc U . R 1 . .
    C C8E 0.3106(6) -0.6849(4) 0.1678(3) 0.0262(15) Uani d . . . 1 . .
    H H8E1 0.3224 -0.6639 0.1275 0.031 Uiso calc U . R 1 . .
    H H8E2 0.3821 -0.7009 0.1809 0.031 Uiso calc U . R 1 . .
    C C9E 0.2032(6) -0.7602(4) 0.1490(3) 0.0305(16) Uani d . . . 1 . .
    H H9E1 0.1317 -0.7448 0.1348 0.037 Uiso calc U . R 1 . .
    H H9E2 0.1903 -0.781 0.1894 0.037 Uiso calc U . R 1 . .
    C C10E 0.2177(6) -0.8287(4) 0.0917(3) 0.0292(16) Uani d . . . 1 . .
    H H10I 0.2404 -0.8055 0.0537 0.035 Uiso calc U . R 1 . .
    H H10J 0.2842 -0.8477 0.1082 0.035 Uiso calc U . R 1 . .
    C C11E 0.1072(7) -0.9030(4) 0.0649(4) 0.0371(18) Uani d . . . 1 . .
    H H11I 0.0413 -0.8849 0.0466 0.045 Uiso calc U . R 1 . .
    H H11J 0.1247 -0.9425 0.0273 0.045 Uiso calc U . R 1 . .
    C C12E 0.0669(7) -0.9460(4) 0.1179(4) 0.0433(19) Uani d . . . 1 . .
    H H12M 0.1327 -0.9623 0.1377 0.065 Uiso calc U . R 1 . .
    H H12N -0.0007 -0.9949 0.097 0.065 Uiso calc U . R 1 . .
    H H12O 0.0425 -0.9088 0.1534 0.065 Uiso calc U . R 1 . .
    C C1F 0.9751(5) 0.0796(3) 0.5625(3) 0.0173(12) Uani d . . . 1 . .
    H H1F1 0.9786 0.0231 0.5597 0.021 Uiso calc U . R 1 . .
    H H1F2 1.018 0.0991 0.5275 0.021 Uiso calc U . R 1 . .
    C C2F 1.0358(5) 0.1351(3) 0.6321(3) 0.0201(13) Uani d . . . 1 . .
    H H2F1 1.1155 0.1279 0.6421 0.024 Uiso calc U . R 1 . .
    H H2F2 0.9886 0.1177 0.6663 0.024 Uiso calc U . R 1 . .
    C C3F 1.0503(5) 0.2261(3) 0.6388(3) 0.0198(13) Uani d . . . 1 . .
    H H3F1 1.0942 0.243 0.6033 0.024 Uiso calc U . R 1 . .
    H H3F2 0.9704 0.2339 0.6312 0.024 Uiso calc U . R 1 . .
    C C4F 1.1164(6) 0.2807(3) 0.7077(3) 0.0218(13) Uani d . . . 1 . .
    H H4F1 1.0684 0.2667 0.7426 0.026 Uiso calc U . R 1 . .
    H H4F2 1.1927 0.2685 0.717 0.026 Uiso calc U . R 1 . .
    C C5F 1.1428(5) 0.3719(3) 0.7146(3) 0.0200(13) Uani d . . . 1 . .
    H H5F1 1.189 0.3859 0.679 0.024 Uiso calc U . R 1 . .
    H H5F2 1.0664 0.3846 0.7068 0.024 Uiso calc U . R 1 . .
    C C6F 1.2114(6) 0.4254(3) 0.7827(3) 0.0221(14) Uani d . . . 1 . .
    H H6F1 1.2866 0.4114 0.7912 0.026 Uiso calc U . R 1 . .
    H H6F2 1.164 0.4125 0.8182 0.026 Uiso calc U . R 1 . .
    C C7F 1.2414(5) 0.5167(4) 0.7894(3) 0.0219(14) Uani d . . . 1 . .
    H H7F1 1.1663 0.5312 0.7829 0.026 Uiso calc U . R 1 . .
    H H7F2 1.2862 0.5294 0.7529 0.026 Uiso calc U . R 1 . .
    C C8F 1.3155(6) 0.5704(4) 0.8578(3) 0.0242(14) Uani d . . . 1 . .
    H H8F1 1.2702 0.5588 0.8944 0.029 Uiso calc U . R 1 . .
    H H8F2 1.3902 0.5555 0.8649 0.029 Uiso calc U . R 1 . .
    C C9F 1.3461(6) 0.6611(4) 0.8627(3) 0.0238(14) Uani d . . . 1 . .
    H H9F1 1.271 0.6757 0.8561 0.029 Uiso calc U . R 1 . .
    H H9F2 1.3896 0.672 0.8253 0.029 Uiso calc U . R 1 . .
    C C10F 1.4210(6) 0.7165(4) 0.9292(3) 0.0249(14) Uani d . . . 1 . .
    H H10K 1.4966 0.7025 0.9358 0.03 Uiso calc U . R 1 . .
    H H10L 1.3778 0.7058 0.9667 0.03 Uiso calc U . R 1 . .
    C C11F 1.4496(6) 0.8072(4) 0.9325(3) 0.0294(16) Uani d . . . 1 . .
    H H11K 1.4911 0.8175 0.8943 0.035 Uiso calc U . R 1 . .
    H H11L 1.374 0.8212 0.9268 0.035 Uiso calc U . R 1 . .
    C C12F 1.5263(7) 0.8628(4) 0.9977(3) 0.0390(19) Uani d . . . 1 . .
    H H12P 1.4851 0.8541 1.0359 0.058 Uiso calc U . R 1 . .
    H H12Q 1.5412 0.9201 0.9964 0.058 Uiso calc U . R 1 . .
    H H12R 1.6023 0.8503 1.0033 0.058 Uiso calc U . R 1 . .

loop_
    _atom_site_aniso_label
    _atom_site_aniso_U_11
    _atom_site_aniso_U_22
    _atom_site_aniso_U_33
    _atom_site_aniso_U_12
    _atom_site_aniso_U_13
    _atom_site_aniso_U_23
    Pt1 0.01604(12) 0.01258(12) 0.01081(11) 0.00110(9) -0.00035(9) 0.00194(8)
    Pt2 0.01612(13) 0.01281(12) 0.01130(11) 0.00147(9) -0.00025(9) 0.00192(8)
    Pt3 0.01618(13) 0.01434(12) 0.01083(11) 0.00167(9) -0.00049(9) 0.00198(8)
    S1 0.0181(8) 0.0135(7) 0.0128(7) 0.0004(6) -0.0007(6) 0.0014(5)
    S2 0.0179(8) 0.0134(7) 0.0121(7) 0.0015(6) -0.0002(6) 0.0038(5)
    S3 0.0175(8) 0.0154(7) 0.0150(7) 0.0016(6) -0.0007(6) 0.0024(6)
    S4 0.0190(8) 0.0161(7) 0.0120(7) 0.0029(6) -0.0012(6) 0.0006(5)
    S5 0.0179(8) 0.0141(7) 0.0135(7) 0.0014(6) 0.0002(6) 0.0022(5)
    S6 0.0171(8) 0.0145(7) 0.0120(7) 0.0008(6) 0.0002(6) 0.0026(5)
    C1A 0.026(3) 0.013(3) 0.020(3) 0.000(2) 0.003(3) 0.004(2)
    C2A 0.031(4) 0.018(3) 0.024(3) 0.004(3) -0.003(3) 0.010(3)
    C3A 0.019(3) 0.016(3) 0.022(3) 0.002(2) -0.001(3) 0.001(2)
    C4A 0.031(4) 0.018(3) 0.018(3) 0.005(3) 0.002(3) 0.001(2)
    C5A 0.023(3) 0.019(3) 0.016(3) 0.000(3) -0.002(3) -0.001(2)
    C6A 0.024(3) 0.019(3) 0.019(3) 0.005(3) -0.002(3) 0.001(2)
    C7A 0.028(4) 0.017(3) 0.018(3) 0.004(3) 0.001(3) 0.000(2)
    C8A 0.026(4) 0.019(3) 0.026(3) 0.005(3) -0.001(3) 0.003(3)
    C9A 0.031(4) 0.018(3) 0.019(3) 0.005(3) -0.001(3) 0.002(2)
    C10A 0.030(4) 0.018(3) 0.021(3) 0.003(3) -0.006(3) 0.001(3)
    C11A 0.034(4) 0.019(3) 0.028(4) 0.003(3) -0.005(3) -0.002(3)
    C12A 0.047(5) 0.022(4) 0.034(4) 0.002(3) -0.007(4) -0.003(3)
    C1B 0.016(3) 0.018(3) 0.019(3) 0.005(2) -0.002(2) 0.006(2)
    C2B 0.026(4) 0.031(4) 0.018(3) 0.005(3) 0.002(3) 0.012(3)
    C3B 0.027(4) 0.030(4) 0.026(3) 0.004(3) 0.004(3) 0.014(3)
    C4B 0.024(4) 0.024(3) 0.033(4) 0.004(3) 0.001(3) 0.015(3)
    C5B 0.028(4) 0.028(4) 0.031(4) 0.003(3) 0.003(3) 0.014(3)
    C6B 0.025(4) 0.031(4) 0.035(4) 0.005(3) 0.006(3) 0.016(3)
    C7B 0.023(4) 0.027(3) 0.026(3) 0.003(3) 0.002(3) 0.010(3)
    C8B 0.027(4) 0.031(4) 0.038(4) 0.011(3) 0.008(3) 0.015(3)
    C9B 0.026(4) 0.025(3) 0.030(4) 0.007(3) 0.004(3) 0.012(3)
    C10B 0.023(3) 0.032(4) 0.027(3) 0.011(3) 0.004(3) 0.016(3)
    C11B 0.023(4) 0.036(4) 0.032(4) 0.008(3) 0.003(3) 0.011(3)
    C12B 0.036(4) 0.027(4) 0.043(4) 0.012(3) -0.001(3) 0.005(3)
    C1C 0.026(4) 0.016(3) 0.020(3) 0.006(3) 0.000(3) 0.004(2)
    C2C 0.016(3) 0.017(3) 0.015(3) 0.001(2) -0.002(2) 0.004(2)
    C3C 0.022(3) 0.019(3) 0.019(3) 0.000(3) -0.001(3) 0.003(2)
    C4C 0.021(3) 0.016(3) 0.023(3) 0.000(3) -0.001(3) 0.007(2)
    C5C 0.023(3) 0.018(3) 0.021(3) -0.001(3) -0.004(3) 0.005(3)
    C6C 0.026(4) 0.020(3) 0.020(3) 0.002(3) 0.000(3) 0.007(3)
    C7C 0.028(4) 0.018(3) 0.020(3) -0.001(3) -0.004(3) 0.005(3)
    C8C 0.026(4) 0.017(3) 0.020(3) -0.001(3) -0.004(3) 0.003(2)
    C9C 0.039(4) 0.016(3) 0.025(3) 0.002(3) 0.003(3) 0.003(3)
    C10C 0.038(4) 0.020(3) 0.024(3) 0.004(3) 0.000(3) 0.005(3)
    C11C 0.056(5) 0.024(4) 0.028(4) 0.002(3) -0.004(4) 0.001(3)
    C12C 0.070(6) 0.024(4) 0.050(5) -0.003(4) -0.020(5) 0.005(4)
    C1D 0.020(3) 0.027(3) 0.014(3) 0.010(3) 0.000(3) 0.005(2)
    C2D 0.020(3) 0.025(3) 0.014(3) 0.007(3) -0.001(3) 0.002(2)
    C3D 0.027(4) 0.023(3) 0.018(3) 0.009(3) 0.003(3) 0.003(3)
    C4D 0.026(4) 0.021(3) 0.016(3) 0.009(3) -0.001(3) 0.005(2)
    C5D 0.029(4) 0.024(3) 0.012(3) 0.009(3) -0.002(3) 0.003(2)
    C6D 0.027(4) 0.022(3) 0.021(3) 0.006(3) 0.001(3) 0.006(3)
    C7D 0.031(4) 0.027(3) 0.015(3) 0.012(3) 0.005(3) 0.005(3)
    C8D 0.030(4) 0.026(3) 0.018(3) 0.011(3) 0.002(3) 0.004(3)
    C9D 0.026(4) 0.027(3) 0.021(3) 0.007(3) 0.006(3) 0.008(3)
    C10D 0.032(4) 0.022(3) 0.021(3) 0.009(3) 0.005(3) 0.005(3)
    C11D 0.043(4) 0.024(4) 0.022(3) 0.008(3) 0.003(3) 0.005(3)
    C12D 0.047(5) 0.025(4) 0.028(4) 0.006(3) 0.005(3) 0.004(3)
    C1E 0.023(3) 0.014(3) 0.016(3) -0.001(2) 0.001(3) 0.000(2)
    C2E 0.019(3) 0.021(3) 0.019(3) 0.002(3) 0.002(3) 0.006(2)
    C3E 0.024(4) 0.020(3) 0.019(3) 0.002(3) 0.000(3) 0.004(3)
    C4E 0.029(4) 0.014(3) 0.018(3) 0.005(3) -0.001(3) 0.004(2)
    C5E 0.022(3) 0.019(3) 0.023(3) 0.004(3) -0.004(3) 0.000(3)
    C6E 0.035(4) 0.016(3) 0.021(3) 0.006(3) 0.000(3) 0.004(2)
    C7E 0.027(4) 0.015(3) 0.023(3) 0.005(3) -0.005(3) 0.000(2)
    C8E 0.037(4) 0.018(3) 0.020(3) 0.005(3) -0.001(3) 0.004(3)
    C9E 0.035(4) 0.018(3) 0.033(4) 0.005(3) -0.004(3) 0.003(3)
    C10E 0.044(4) 0.017(3) 0.025(3) 0.005(3) -0.002(3) 0.008(3)
    C11E 0.045(5) 0.020(4) 0.038(4) 0.002(3) -0.007(4) 0.006(3)
    C12E 0.045(5) 0.032(4) 0.045(5) 0.002(3) 0.006(4) 0.006(3)
    C1F 0.013(3) 0.019(3) 0.017(3) 0.000(2) 0.000(2) 0.003(2)
    C2F 0.018(3) 0.020(3) 0.016(3) 0.001(2) -0.005(3) -0.001(2)
    C3F 0.016(3) 0.023(3) 0.016(3) 0.000(2) 0.000(3) 0.005(2)
    C4F 0.025(3) 0.019(3) 0.016(3) 0.004(3) -0.003(3) -0.001(2)
    C5F 0.021(3) 0.023(3) 0.013(3) 0.003(3) 0.002(3) 0.004(2)
    C6F 0.028(4) 0.020(3) 0.014(3) 0.005(3) -0.003(3) 0.001(2)
    C7F 0.021(3) 0.026(3) 0.017(3) 0.003(3) 0.003(3) 0.006(3)
    C8F 0.027(4) 0.022(3) 0.019(3) 0.002(3) -0.001(3) 0.003(3)
    C9F 0.027(4) 0.020(3) 0.020(3) 0.001(3) -0.002(3) 0.006(3)
    C10F 0.031(4) 0.021(3) 0.019(3) 0.002(3) 0.000(3) 0.005(3)
    C11F 0.038(4) 0.020(3) 0.024(3) 0.001(3) 0.003(3) 0.003(3)
    C12F 0.049(5) 0.020(4) 0.037(4) -0.003(3) 0.009(4) -0.001(3)

_geom_special_details                   
;
All esds (except the esd in the dihedral angle between two l.s. planes)
are estimated using the full covariance matrix.  The cell esds are taken
into account individually in the estimation of esds in distances, angles
and torsion angles; correlations between esds in cell parameters are only
used when they are defined by crystal symmetry.  An approximate (isotropic)
treatment of cell esds is used for estimating esds involving l.s. planes.
;

loop_
    _geom_bond_atom_site_label_1
    _geom_bond_atom_site_label_2
    _geom_bond_site_symmetry_2
    _geom_bond_distance
    _geom_bond_publ_flag
    Pt1 S6 2_656 2.3139(13) ?
    Pt1 S2 . 2.3151(13) ?
    Pt1 S1 . 2.3164(14) ?
    Pt1 S5 2_656 2.3232(14) ?
    Pt1 Pt2 . 3.0889(3) ?
    Pt1 Pt3 2_656 3.2295(3) ?
    Pt2 S1 . 2.3187(14) ?
    Pt2 S2 . 2.3197(14) ?
    Pt2 S4 . 2.3199(15) ?
    Pt2 S3 . 2.3217(14) ?
    Pt2 Pt3 . 3.1957(3) ?
    Pt3 S6 . 2.3194(14) ?
    Pt3 S5 . 2.3211(14) ?
    Pt3 S4 . 2.3237(14) ?
    Pt3 S3 . 2.3247(15) ?
    Pt3 Pt1 2_656 3.2296(3) ?
    S1 C1A . 1.825(6) ?
    S2 C1B . 1.834(6) ?
    S3 C1C . 1.832(6) ?
    S4 C1D . 1.831(6) ?
    S5 C1E . 1.828(6) ?
    S5 Pt1 2_656 2.3233(14) ?
    S6 C1F . 1.823(6) ?
    S6 Pt1 2_656 2.3140(13) ?
    C1A C2A . 1.502(8) ?
    C1A H1A1 . 0.99 ?
    C1A H1A2 . 0.99 ?
    C2A C3A . 1.529(8) ?
    C2A H2A1 . 0.99 ?
    C2A H2A2 . 0.99 ?
    C3A C4A . 1.517(8) ?
    C3A H3A1 . 0.99 ?
    C3A H3A2 . 0.99 ?
    C4A C5A . 1.524(8) ?
    C4A H4A1 . 0.99 ?
    C4A H4A2 . 0.99 ?
    C5A C6A . 1.521(8) ?
    C5A H5A1 . 0.99 ?
    C5A H5A2 . 0.99 ?
    C6A C7A . 1.512(8) ?
    C6A H6A1 . 0.99 ?
    C6A H6A2 . 0.99 ?
    C7A C8A . 1.518(8) ?
    C7A H7A1 . 0.99 ?
    C7A H7A2 . 0.99 ?
    C8A C9A . 1.523(8) ?
    C8A H8A1 . 0.99 ?
    C8A H8A2 . 0.99 ?
    C9A C10A . 1.524(8) ?
    C9A H9A1 . 0.99 ?
    C9A H9A2 . 0.99 ?
    C10A C11A . 1.512(8) ?
    C10A H10A . 0.99 ?
    C10A H10B . 0.99 ?
    C11A C12A . 1.528(9) ?
    C11A H11A . 0.99 ?
    C11A H11B . 0.99 ?
    C12A H12A . 0.98 ?
    C12A H12B . 0.98 ?
    C12A H12C . 0.98 ?
    C1B C2B . 1.514(8) ?
    C1B H1B1 . 0.99 ?
    C1B H1B2 . 0.99 ?
    C2B C3B . 1.538(8) ?
    C2B H2B1 . 0.99 ?
    C2B H2B2 . 0.99 ?
    C3B C4B . 1.524(9) ?
    C3B H3B1 . 0.99 ?
    C3B H3B2 . 0.99 ?
    C4B C5B . 1.535(8) ?
    C4B H4B1 . 0.99 ?
    C4B H4B2 . 0.99 ?
    C5B C6B . 1.515(9) ?
    C5B H5B1 . 0.99 ?
    C5B H5B2 . 0.99 ?
    C6B C7B . 1.523(8) ?
    C6B H6B1 . 0.99 ?
    C6B H6B2 . 0.99 ?
    C7B C8B . 1.518(9) ?
    C7B H7B1 . 0.99 ?
    C7B H7B2 . 0.99 ?
    C8B C9B . 1.522(9) ?
    C8B H8B1 . 0.99 ?
    C8B H8B2 . 0.99 ?
    C9B C10B . 1.521(9) ?
    C9B H9B1 . 0.99 ?
    C9B H9B2 . 0.99 ?
    C10B C11B . 1.520(9) ?
    C10B H10C . 0.99 ?
    C10B H10D . 0.99 ?
    C11B C12B . 1.511(9) ?
    C11B H11C . 0.99 ?
    C11B H11D . 0.99 ?
    C12B H12D . 0.98 ?
    C12B H12E . 0.98 ?
    C12B H12F . 0.98 ?
    C1C C2C . 1.517(8) ?
    C1C H1C1 . 0.99 ?
    C1C H1C2 . 0.99 ?
    C2C C3C . 1.511(8) ?
    C2C H2C1 . 0.99 ?
    C2C H2C2 . 0.99 ?
    C3C C4C . 1.523(8) ?
    C3C H3C1 . 0.99 ?
    C3C H3C2 . 0.99 ?
    C4C C5C . 1.518(8) ?
    C4C H4C1 . 0.99 ?
    C4C H4C2 . 0.99 ?
    C5C C6C . 1.522(8) ?
    C5C H5C1 . 0.99 ?
    C5C H5C2 . 0.99 ?
    C6C C7C . 1.510(8) ?
    C6C H6C1 . 0.99 ?
    C6C H6C2 . 0.99 ?
    C7C C8C . 1.518(8) ?
    C7C H7C1 . 0.99 ?
    C7C H7C2 . 0.99 ?
    C8C C9C . 1.516(8) ?
    C8C H8C1 . 0.99 ?
    C8C H8C2 . 0.99 ?
    C9C C10C . 1.528(9) ?
    C9C H9C1 . 0.99 ?
    C9C H9C2 . 0.99 ?
    C10C C11C . 1.507(9) ?
    C10C H10E . 0.99 ?
    C10C H10F . 0.99 ?
    C11C C12C . 1.508(10) ?
    C11C H11E . 0.99 ?
    C11C H11F . 0.99 ?
    C12C H12G . 0.98 ?
    C12C H12H . 0.98 ?
    C12C H12I . 0.98 ?
    C1D C2D . 1.535(8) ?
    C1D H1D1 . 0.99 ?
    C1D H1D2 . 0.99 ?
    C2D C3D . 1.514(8) ?
    C2D H2D1 . 0.99 ?
    C2D H2D2 . 0.99 ?
    C3D C4D . 1.516(8) ?
    C3D H3D1 . 0.99 ?
    C3D H3D2 . 0.99 ?
    C4D C5D . 1.522(8) ?
    C4D H4D1 . 0.99 ?
    C4D H4D2 . 0.99 ?
    C5D C6D . 1.524(8) ?
    C5D H5D1 . 0.99 ?
    C5D H5D2 . 0.99 ?
    C6D C7D . 1.530(8) ?
    C6D H6D1 . 0.99 ?
    C6D H6D2 . 0.99 ?
    C7D C8D . 1.521(8) ?
    C7D H7D1 . 0.99 ?
    C7D H7D2 . 0.99 ?
    C8D C9D . 1.529(8) ?
    C8D H8D1 . 0.99 ?
    C8D H8D2 . 0.99 ?
    C9D C10D . 1.509(8) ?
    C9D H9D1 . 0.99 ?
    C9D H9D2 . 0.99 ?
    C10D C11D . 1.520(8) ?
    C10D H10G . 0.99 ?
    C10D H10H . 0.99 ?
    C11D C12D . 1.519(9) ?
    C11D H11G . 0.99 ?
    C11D H11H . 0.99 ?
    C12D H12J . 0.98 ?
    C12D H12K . 0.98 ?
    C12D H12L . 0.98 ?
    C1E C2E . 1.515(8) ?
    C1E H1E1 . 0.99 ?
    C1E H1E2 . 0.99 ?
    C2E C3E . 1.515(8) ?
    C2E H2E1 . 0.99 ?
    C2E H2E2 . 0.99 ?
    C3E C4E . 1.526(8) ?
    C3E H3E1 . 0.99 ?
    C3E H3E2 . 0.99 ?
    C4E C5E . 1.521(8) ?
    C4E H4E1 . 0.99 ?
    C4E H4E2 . 0.99 ?
    C5E C6E . 1.517(8) ?
    C5E H5E1 . 0.99 ?
    C5E H5E2 . 0.99 ?
    C6E C7E . 1.524(8) ?
    C6E H6E1 . 0.99 ?
    C6E H6E2 . 0.99 ?
    C7E C8E . 1.523(8) ?
    C7E H7E1 . 0.99 ?
    C7E H7E2 . 0.99 ?
    C8E C9E . 1.512(8) ?
    C8E H8E1 . 0.99 ?
    C8E H8E2 . 0.99 ?
    C9E C10E . 1.535(9) ?
    C9E H9E1 . 0.99 ?
    C9E H9E2 . 0.99 ?
    C10E C11E . 1.529(9) ?
    C10E H10I . 0.99 ?
    C10E H10J . 0.99 ?
    C11E C12E . 1.505(10) ?
    C11E H11I . 0.99 ?
    C11E H11J . 0.99 ?
    C12E H12M . 0.98 ?
    C12E H12N . 0.98 ?
    C12E H12O . 0.98 ?
    C1F C2F . 1.521(7) ?
    C1F H1F1 . 0.99 ?
    C1F H1F2 . 0.99 ?
    C2F C3F . 1.530(8) ?
    C2F H2F1 . 0.99 ?
    C2F H2F2 . 0.99 ?
    C3F C4F . 1.520(8) ?
    C3F H3F1 . 0.99 ?
    C3F H3F2 . 0.99 ?
    C4F C5F . 1.515(8) ?
    C4F H4F1 . 0.99 ?
    C4F H4F2 . 0.99 ?
    C5F C6F . 1.510(8) ?
    C5F H5F1 . 0.99 ?
    C5F H5F2 . 0.99 ?
    C6F C7F . 1.515(8) ?
    C6F H6F1 . 0.99 ?
    C6F H6F2 . 0.99 ?
    C7F C8F . 1.535(8) ?
    C7F H7F1 . 0.99 ?
    C7F H7F2 . 0.99 ?
    C8F C9F . 1.512(8) ?
    C8F H8F1 . 0.99 ?
    C8F H8F2 . 0.99 ?
    C9F C10F . 1.518(8) ?
    C9F H9F1 . 0.99 ?
    C9F H9F2 . 0.99 ?
    C10F C11F . 1.519(8) ?
    C10F H10K . 0.99 ?
    C10F H10L . 0.99 ?
    C11F C12F . 1.509(9) ?
    C11F H11K . 0.99 ?
    C11F H11L . 0.99 ?
    C12F H12P . 0.98 ?
    C12F H12Q . 0.98 ?
    C12F H12R . 0.98 ?

loop_
    _geom_angle_atom_site_label_1
    _geom_angle_atom_site_label_2
    _geom_angle_atom_site_label_3
    _geom_angle_site_symmetry_1
    _geom_angle_site_symmetry_3
    _geom_angle
    _geom_angle_publ_flag
    S6 Pt1 S2 2_656 . 169.59(5) ?
    S6 Pt1 S1 2_656 . 99.88(5) ?
    S2 Pt1 S1 . . 80.40(5) ?
    S6 Pt1 S5 2_656 2_656 81.66(5) ?
    S2 Pt1 S5 . 2_656 98.08(5) ?
    S1 Pt1 S5 . 2_656 178.46(5) ?
    S6 Pt1 Pt2 2_656 . 124.79(4) ?
    S2 Pt1 Pt2 . . 48.27(4) ?
    S1 Pt1 Pt2 . . 48.24(4) ?
    S5 Pt1 Pt2 2_656 . 130.77(4) ?
    S6 Pt1 Pt3 2_656 2_656 45.88(3) ?
    S2 Pt1 Pt3 . 2_656 127.77(3) ?
    S1 Pt1 Pt3 . 2_656 135.35(4) ?
    S5 Pt1 Pt3 2_656 2_656 45.92(4) ?
    Pt2 Pt1 Pt3 . 2_656 120.933(9) ?
    S1 Pt2 S2 . . 80.26(5) ?
    S1 Pt2 S4 . . 99.83(5) ?
    S2 Pt2 S4 . . 168.40(5) ?
    S1 Pt2 S3 . . 176.28(5) ?
    S2 Pt2 S3 . . 97.14(5) ?
    S4 Pt2 S3 . . 82.18(5) ?
    S1 Pt2 Pt1 . . 48.18(3) ?
    S2 Pt2 Pt1 . . 48.14(3) ?
    S4 Pt2 Pt1 . . 123.93(4) ?
    S3 Pt2 Pt1 . . 128.12(4) ?
    S1 Pt2 Pt3 . . 133.21(4) ?
    S2 Pt2 Pt3 . . 125.85(4) ?
    S4 Pt2 Pt3 . . 46.56(3) ?
    S3 Pt2 Pt3 . . 46.59(4) ?
    Pt1 Pt2 Pt3 . . 117.082(9) ?
    S6 Pt3 S5 . . 81.59(5) ?
    S6 Pt3 S4 . . 167.61(5) ?
    S5 Pt3 S4 . . 98.43(5) ?
    S6 Pt3 S3 . . 97.07(5) ?
    S5 Pt3 S3 . . 175.87(5) ?
    S4 Pt3 S3 . . 82.03(5) ?
    S6 Pt3 Pt2 . . 125.29(4) ?
    S5 Pt3 Pt2 . . 131.47(4) ?
    S4 Pt3 Pt2 . . 46.46(4) ?
    S3 Pt3 Pt2 . . 46.51(4) ?
    S6 Pt3 Pt1 . 2_656 45.74(3) ?
    S5 Pt3 Pt1 . 2_656 45.97(3) ?
    S4 Pt3 Pt1 . 2_656 126.85(4) ?
    S3 Pt3 Pt1 . 2_656 130.74(4) ?
    Pt2 Pt3 Pt1 . 2_656 121.984(9) ?
    C1A S1 Pt1 . . 112.39(19) ?
    C1A S1 Pt2 . . 112.7(2) ?
    Pt1 S1 Pt2 . . 83.58(4) ?
    C1B S2 Pt1 . . 109.95(19) ?
    C1B S2 Pt2 . . 109.38(19) ?
    Pt1 S2 Pt2 . . 83.59(5) ?
    C1C S3 Pt2 . . 106.2(2) ?
    C1C S3 Pt3 . . 107.1(2) ?
    Pt2 S3 Pt3 . . 86.91(5) ?
    C1D S4 Pt2 . . 107.4(2) ?
    C1D S4 Pt3 . . 109.16(19) ?
    Pt2 S4 Pt3 . . 86.98(5) ?
    C1E S5 Pt3 . . 108.7(2) ?
    C1E S5 Pt1 . 2_656 108.19(19) ?
    Pt3 S5 Pt1 . 2_656 88.11(5) ?
    C1F S6 Pt1 . 2_656 105.75(19) ?
    C1F S6 Pt3 . . 110.36(19) ?
    Pt1 S6 Pt3 2_656 . 88.37(5) ?
    C2A C1A S1 . . 109.7(4) ?
    C2A C1A H1A1 . . 109.7 ?
    S1 C1A H1A1 . . 109.7 ?
    C2A C1A H1A2 . . 109.7 ?
    S1 C1A H1A2 . . 109.7 ?
    H1A1 C1A H1A2 . . 108.2 ?
    C1A C2A C3A . . 113.8(5) ?
    C1A C2A H2A1 . . 108.8 ?
    C3A C2A H2A1 . . 108.8 ?
    C1A C2A H2A2 . . 108.8 ?
    C3A C2A H2A2 . . 108.8 ?
    H2A1 C2A H2A2 . . 107.7 ?
    C4A C3A C2A . . 112.6(5) ?
    C4A C3A H3A1 . . 109.1 ?
    C2A C3A H3A1 . . 109.1 ?
    C4A C3A H3A2 . . 109.1 ?
    C2A C3A H3A2 . . 109.1 ?
    H3A1 C3A H3A2 . . 107.8 ?
    C3A C4A C5A . . 114.0(5) ?
    C3A C4A H4A1 . . 108.8 ?
    C5A C4A H4A1 . . 108.8 ?
    C3A C4A H4A2 . . 108.8 ?
    C5A C4A H4A2 . . 108.8 ?
    H4A1 C4A H4A2 . . 107.7 ?
    C6A C5A C4A . . 113.5(5) ?
    C6A C5A H5A1 . . 108.9 ?
    C4A C5A H5A1 . . 108.9 ?
    C6A C5A H5A2 . . 108.9 ?
    C4A C5A H5A2 . . 108.9 ?
    H5A1 C5A H5A2 . . 107.7 ?
    C7A C6A C5A . . 114.2(5) ?
    C7A C6A H6A1 . . 108.7 ?
    C5A C6A H6A1 . . 108.7 ?
    C7A C6A H6A2 . . 108.7 ?
    C5A C6A H6A2 . . 108.7 ?
    H6A1 C6A H6A2 . . 107.6 ?
    C6A C7A C8A . . 114.3(5) ?
    C6A C7A H7A1 . . 108.7 ?
    C8A C7A H7A1 . . 108.7 ?
    C6A C7A H7A2 . . 108.7 ?
    C8A C7A H7A2 . . 108.7 ?
    H7A1 C7A H7A2 . . 107.6 ?
    C7A C8A C9A . . 113.7(5) ?
    C7A C8A H8A1 . . 108.8 ?
    C9A C8A H8A1 . . 108.8 ?
    C7A C8A H8A2 . . 108.8 ?
    C9A C8A H8A2 . . 108.8 ?
    H8A1 C8A H8A2 . . 107.7 ?
    C8A C9A C10A . . 114.3(5) ?
    C8A C9A H9A1 . . 108.7 ?
    C10A C9A H9A1 . . 108.7 ?
    C8A C9A H9A2 . . 108.7 ?
    C10A C9A H9A2 . . 108.7 ?
    H9A1 C9A H9A2 . . 107.6 ?
    C11A C10A C9A . . 114.2(5) ?
    C11A C10A H10A . . 108.7 ?
    C9A C10A H10A . . 108.7 ?
    C11A C10A H10B . . 108.7 ?
    C9A C10A H10B . . 108.7 ?
    H10A C10A H10B . . 107.6 ?
    C10A C11A C12A . . 113.3(6) ?
    C10A C11A H11A . . 108.9 ?
    C12A C11A H11A . . 108.9 ?
    C10A C11A H11B . . 108.9 ?
    C12A C11A H11B . . 108.9 ?
    H11A C11A H11B . . 107.7 ?
    C11A C12A H12A . . 109.5 ?
    C11A C12A H12B . . 109.5 ?
    H12A C12A H12B . . 109.5 ?
    C11A C12A H12C . . 109.5 ?
    H12A C12A H12C . . 109.5 ?
    H12B C12A H12C . . 109.5 ?
    C2B C1B S2 . . 111.1(4) ?
    C2B C1B H1B1 . . 109.4 ?
    S2 C1B H1B1 . . 109.4 ?
    C2B C1B H1B2 . . 109.4 ?
    S2 C1B H1B2 . . 109.4 ?
    H1B1 C1B H1B2 . . 108.0 ?
    C1B C2B C3B . . 116.6(5) ?
    C1B C2B H2B1 . . 108.1 ?
    C3B C2B H2B1 . . 108.1 ?
    C1B C2B H2B2 . . 108.1 ?
    C3B C2B H2B2 . . 108.1 ?
    H2B1 C2B H2B2 . . 107.3 ?
    C4B C3B C2B . . 117.9(5) ?
    C4B C3B H3B1 . . 107.8 ?
    C2B C3B H3B1 . . 107.8 ?
    C4B C3B H3B2 . . 107.8 ?
    C2B C3B H3B2 . . 107.8 ?
    H3B1 C3B H3B2 . . 107.2 ?
    C3B C4B C5B . . 111.1(5) ?
    C3B C4B H4B1 . . 109.4 ?
    C5B C4B H4B1 . . 109.4 ?
    C3B C4B H4B2 . . 109.4 ?
    C5B C4B H4B2 . . 109.4 ?
    H4B1 C4B H4B2 . . 108.0 ?
    C6B C5B C4B . . 116.8(6) ?
    C6B C5B H5B1 . . 108.1 ?
    C4B C5B H5B1 . . 108.1 ?
    C6B C5B H5B2 . . 108.1 ?
    C4B C5B H5B2 . . 108.1 ?
    H5B1 C5B H5B2 . . 107.3 ?
    C5B C6B C7B . . 112.8(5) ?
    C5B C6B H6B1 . . 109.0 ?
    C7B C6B H6B1 . . 109.0 ?
    C5B C6B H6B2 . . 109.0 ?
    C7B C6B H6B2 . . 109.0 ?
    H6B1 C6B H6B2 . . 107.8 ?
    C8B C7B C6B . . 116.5(5) ?
    C8B C7B H7B1 . . 108.2 ?
    C6B C7B H7B1 . . 108.2 ?
    C8B C7B H7B2 . . 108.2 ?
    C6B C7B H7B2 . . 108.2 ?
    H7B1 C7B H7B2 . . 107.3 ?
    C7B C8B C9B . . 112.6(5) ?
    C7B C8B H8B1 . . 109.1 ?
    C9B C8B H8B1 . . 109.1 ?
    C7B C8B H8B2 . . 109.1 ?
    C9B C8B H8B2 . . 109.1 ?
    H8B1 C8B H8B2 . . 107.8 ?
    C10B C9B C8B . . 115.7(5) ?
    C10B C9B H9B1 . . 108.4 ?
    C8B C9B H9B1 . . 108.4 ?
    C10B C9B H9B2 . . 108.4 ?
    C8B C9B H9B2 . . 108.4 ?
    H9B1 C9B H9B2 . . 107.4 ?
    C11B C10B C9B . . 113.8(5) ?
    C11B C10B H10C . . 108.8 ?
    C9B C10B H10C . . 108.8 ?
    C11B C10B H10D . . 108.8 ?
    C9B C10B H10D . . 108.8 ?
    H10C C10B H10D . . 107.7 ?
    C12B C11B C10B . . 115.7(6) ?
    C12B C11B H11C . . 108.4 ?
    C10B C11B H11C . . 108.4 ?
    C12B C11B H11D . . 108.4 ?
    C10B C11B H11D . . 108.4 ?
    H11C C11B H11D . . 107.4 ?
    C11B C12B H12D . . 109.5 ?
    C11B C12B H12E . . 109.5 ?
    H12D C12B H12E . . 109.5 ?
    C11B C12B H12F . . 109.5 ?
    H12D C12B H12F . . 109.5 ?
    H12E C12B H12F . . 109.5 ?
    C2C C1C S3 . . 113.3(4) ?
    C2C C1C H1C1 . . 108.9 ?
    S3 C1C H1C1 . . 108.9 ?
    C2C C1C H1C2 . . 108.9 ?
    S3 C1C H1C2 . . 108.9 ?
    H1C1 C1C H1C2 . . 107.7 ?
    C3C C2C C1C . . 110.9(5) ?
    C3C C2C H2C1 . . 109.5 ?
    C1C C2C H2C1 . . 109.5 ?
    C3C C2C H2C2 . . 109.5 ?
    C1C C2C H2C2 . . 109.5 ?
    H2C1 C2C H2C2 . . 108.0 ?
    C2C C3C C4C . . 114.0(5) ?
    C2C C3C H3C1 . . 108.7 ?
    C4C C3C H3C1 . . 108.7 ?
    C2C C3C H3C2 . . 108.7 ?
    C4C C3C H3C2 . . 108.7 ?
    H3C1 C3C H3C2 . . 107.6 ?
    C5C C4C C3C . . 113.9(5) ?
    C5C C4C H4C1 . . 108.8 ?
    C3C C4C H4C1 . . 108.8 ?
    C5C C4C H4C2 . . 108.8 ?
    C3C C4C H4C2 . . 108.8 ?
    H4C1 C4C H4C2 . . 107.7 ?
    C4C C5C C6C . . 113.0(5) ?
    C4C C5C H5C1 . . 109.0 ?
    C6C C5C H5C1 . . 109.0 ?
    C4C C5C H5C2 . . 109.0 ?
    C6C C5C H5C2 . . 109.0 ?
    H5C1 C5C H5C2 . . 107.8 ?
    C7C C6C C5C . . 114.7(5) ?
    C7C C6C H6C1 . . 108.6 ?
    C5C C6C H6C1 . . 108.6 ?
    C7C C6C H6C2 . . 108.6 ?
    C5C C6C H6C2 . . 108.6 ?
    H6C1 C6C H6C2 . . 107.6 ?
    C6C C7C C8C . . 112.9(5) ?
    C6C C7C H7C1 . . 109.0 ?
    C8C C7C H7C1 . . 109.0 ?
    C6C C7C H7C2 . . 109.0 ?
    C8C C7C H7C2 . . 109.0 ?
    H7C1 C7C H7C2 . . 107.8 ?
    C9C C8C C7C . . 115.4(5) ?
    C9C C8C H8C1 . . 108.4 ?
    C7C C8C H8C1 . . 108.4 ?
    C9C C8C H8C2 . . 108.4 ?
    C7C C8C H8C2 . . 108.4 ?
    H8C1 C8C H8C2 . . 107.5 ?
    C8C C9C C10C . . 112.2(5) ?
    C8C C9C H9C1 . . 109.2 ?
    C10C C9C H9C1 . . 109.2 ?
    C8C C9C H9C2 . . 109.2 ?
    C10C C9C H9C2 . . 109.2 ?
    H9C1 C9C H9C2 . . 107.9 ?
    C11C C10C C9C . . 115.3(6) ?
    C11C C10C H10E . . 108.4 ?
    C9C C10C H10E . . 108.4 ?
    C11C C10C H10F . . 108.4 ?
    C9C C10C H10F . . 108.4 ?
    H10E C10C H10F . . 107.5 ?
    C10C C11C C12C . . 112.6(7) ?
    C10C C11C H11E . . 109.1 ?
    C12C C11C H11E . . 109.1 ?
    C10C C11C H11F . . 109.1 ?
    C12C C11C H11F . . 109.1 ?
    H11E C11C H11F . . 107.8 ?
    C11C C12C H12G . . 109.5 ?
    C11C C12C H12H . . 109.5 ?
    H12G C12C H12H . . 109.5 ?
    C11C C12C H12I . . 109.5 ?
    H12G C12C H12I . . 109.5 ?
    H12H C12C H12I . . 109.5 ?
    C2D C1D S4 . . 111.0(4) ?
    C2D C1D H1D1 . . 109.4 ?
    S4 C1D H1D1 . . 109.4 ?
    C2D C1D H1D2 . . 109.4 ?
    S4 C1D H1D2 . . 109.4 ?
    H1D1 C1D H1D2 . . 108.0 ?
    C3D C2D C1D . . 115.0(5) ?
    C3D C2D H2D1 . . 108.5 ?
    C1D C2D H2D1 . . 108.5 ?
    C3D C2D H2D2 . . 108.5 ?
    C1D C2D H2D2 . . 108.5 ?
    H2D1 C2D H2D2 . . 107.5 ?
    C2D C3D C4D . . 113.3(5) ?
    C2D C3D H3D1 . . 108.9 ?
    C4D C3D H3D1 . . 108.9 ?
    C2D C3D H3D2 . . 108.9 ?
    C4D C3D H3D2 . . 108.9 ?
    H3D1 C3D H3D2 . . 107.7 ?
    C3D C4D C5D . . 114.0(5) ?
    C3D C4D H4D1 . . 108.8 ?
    C5D C4D H4D1 . . 108.8 ?
    C3D C4D H4D2 . . 108.8 ?
    C5D C4D H4D2 . . 108.8 ?
    H4D1 C4D H4D2 . . 107.6 ?
    C4D C5D C6D . . 113.7(5) ?
    C4D C5D H5D1 . . 108.8 ?
    C6D C5D H5D1 . . 108.8 ?
    C4D C5D H5D2 . . 108.8 ?
    C6D C5D H5D2 . . 108.8 ?
    H5D1 C5D H5D2 . . 107.7 ?
    C5D C6D C7D . . 113.8(5) ?
    C5D C6D H6D1 . . 108.8 ?
    C7D C6D H6D1 . . 108.8 ?
    C5D C6D H6D2 . . 108.8 ?
    C7D C6D H6D2 . . 108.8 ?
    H6D1 C6D H6D2 . . 107.7 ?
    C8D C7D C6D . . 113.9(5) ?
    C8D C7D H7D1 . . 108.8 ?
    C6D C7D H7D1 . . 108.8 ?
    C8D C7D H7D2 . . 108.8 ?
    C6D C7D H7D2 . . 108.8 ?
    H7D1 C7D H7D2 . . 107.7 ?
    C7D C8D C9D . . 114.3(5) ?
    C7D C8D H8D1 . . 108.7 ?
    C9D C8D H8D1 . . 108.7 ?
    C7D C8D H8D2 . . 108.7 ?
    C9D C8D H8D2 . . 108.7 ?
    H8D1 C8D H8D2 . . 107.6 ?
    C10D C9D C8D . . 114.4(5) ?
    C10D C9D H9D1 . . 108.7 ?
    C8D C9D H9D1 . . 108.7 ?
    C10D C9D H9D2 . . 108.7 ?
    C8D C9D H9D2 . . 108.7 ?
    H9D1 C9D H9D2 . . 107.6 ?
    C9D C10D C11D . . 115.2(5) ?
    C9D C10D H10G . . 108.5 ?
    C11D C10D H10G . . 108.5 ?
    C9D C10D H10H . . 108.5 ?
    C11D C10D H10H . . 108.5 ?
    H10G C10D H10H . . 107.5 ?
    C12D C11D C10D . . 113.3(5) ?
    C12D C11D H11G . . 108.9 ?
    C10D C11D H11G . . 108.9 ?
    C12D C11D H11H . . 108.9 ?
    C10D C11D H11H . . 108.9 ?
    H11G C11D H11H . . 107.7 ?
    C11D C12D H12J . . 109.5 ?
    C11D C12D H12K . . 109.5 ?
    H12J C12D H12K . . 109.5 ?
    C11D C12D H12L . . 109.5 ?
    H12J C12D H12L . . 109.5 ?
    H12K C12D H12L . . 109.5 ?
    C2E C1E S5 . . 112.3(4) ?
    C2E C1E H1E1 . . 109.2 ?
    S5 C1E H1E1 . . 109.2 ?
    C2E C1E H1E2 . . 109.2 ?
    S5 C1E H1E2 . . 109.2 ?
    H1E1 C1E H1E2 . . 107.9 ?
    C1E C2E C3E . . 111.2(5) ?
    C1E C2E H2E1 . . 109.4 ?
    C3E C2E H2E1 . . 109.4 ?
    C1E C2E H2E2 . . 109.4 ?
    C3E C2E H2E2 . . 109.4 ?
    H2E1 C2E H2E2 . . 108.0 ?
    C2E C3E C4E . . 114.1(5) ?
    C2E C3E H3E1 . . 108.7 ?
    C4E C3E H3E1 . . 108.7 ?
    C2E C3E H3E2 . . 108.7 ?
    C4E C3E H3E2 . . 108.7 ?
    H3E1 C3E H3E2 . . 107.6 ?
    C5E C4E C3E . . 113.3(5) ?
    C5E C4E H4E1 . . 108.9 ?
    C3E C4E H4E1 . . 108.9 ?
    C5E C4E H4E2 . . 108.9 ?
    C3E C4E H4E2 . . 108.9 ?
    H4E1 C4E H4E2 . . 107.7 ?
    C6E C5E C4E . . 113.7(5) ?
    C6E C5E H5E1 . . 108.8 ?
    C4E C5E H5E1 . . 108.8 ?
    C6E C5E H5E2 . . 108.8 ?
    C4E C5E H5E2 . . 108.8 ?
    H5E1 C5E H5E2 . . 107.7 ?
    C5E C6E C7E . . 113.9(5) ?
    C5E C6E H6E1 . . 108.8 ?
    C7E C6E H6E1 . . 108.8 ?
    C5E C6E H6E2 . . 108.8 ?
    C7E C6E H6E2 . . 108.8 ?
    H6E1 C6E H6E2 . . 107.7 ?
    C8E C7E C6E . . 113.0(5) ?
    C8E C7E H7E1 . . 109.0 ?
    C6E C7E H7E1 . . 109.0 ?
    C8E C7E H7E2 . . 109.0 ?
    C6E C7E H7E2 . . 109.0 ?
    H7E1 C7E H7E2 . . 107.8 ?
    C9E C8E C7E . . 114.0(5) ?
    C9E C8E H8E1 . . 108.8 ?
    C7E C8E H8E1 . . 108.8 ?
    C9E C8E H8E2 . . 108.8 ?
    C7E C8E H8E2 . . 108.8 ?
    H8E1 C8E H8E2 . . 107.7 ?
    C8E C9E C10E . . 112.5(6) ?
    C8E C9E H9E1 . . 109.1 ?
    C10E C9E H9E1 . . 109.1 ?
    C8E C9E H9E2 . . 109.1 ?
    C10E C9E H9E2 . . 109.1 ?
    H9E1 C9E H9E2 . . 107.8 ?
    C11E C10E C9E . . 115.2(6) ?
    C11E C10E H10I . . 108.5 ?
    C9E C10E H10I . . 108.5 ?
    C11E C10E H10J . . 108.5 ?
    C9E C10E H10J . . 108.5 ?
    H10I C10E H10J . . 107.5 ?
    C12E C11E C10E . . 113.4(6) ?
    C12E C11E H11I . . 108.9 ?
    C10E C11E H11I . . 108.9 ?
    C12E C11E H11J . . 108.9 ?
    C10E C11E H11J . . 108.9 ?
    H11I C11E H11J . . 107.7 ?
    C11E C12E H12M . . 109.5 ?
    C11E C12E H12N . . 109.5 ?
    H12M C12E H12N . . 109.5 ?
    C11E C12E H12O . . 109.5 ?
    H12M C12E H12O . . 109.5 ?
    H12N C12E H12O . . 109.5 ?
    C2F C1F S6 . . 111.0(4) ?
    C2F C1F H1F1 . . 109.4 ?
    S6 C1F H1F1 . . 109.4 ?
    C2F C1F H1F2 . . 109.4 ?
    S6 C1F H1F2 . . 109.4 ?
    H1F1 C1F H1F2 . . 108.0 ?
    C1F C2F C3F . . 113.8(5) ?
    C1F C2F H2F1 . . 108.8 ?
    C3F C2F H2F1 . . 108.8 ?
    C1F C2F H2F2 . . 108.8 ?
    C3F C2F H2F2 . . 108.8 ?
    H2F1 C2F H2F2 . . 107.7 ?
    C4F C3F C2F . . 112.9(5) ?
    C4F C3F H3F1 . . 109.0 ?
    C2F C3F H3F1 . . 109.0 ?
    C4F C3F H3F2 . . 109.0 ?
    C2F C3F H3F2 . . 109.0 ?
    H3F1 C3F H3F2 . . 107.8 ?
    C5F C4F C3F . . 114.8(5) ?
    C5F C4F H4F1 . . 108.6 ?
    C3F C4F H4F1 . . 108.6 ?
    C5F C4F H4F2 . . 108.6 ?
    C3F C4F H4F2 . . 108.6 ?
    H4F1 C4F H4F2 . . 107.5 ?
    C6F C5F C4F . . 114.1(5) ?
    C6F C5F H5F1 . . 108.7 ?
    C4F C5F H5F1 . . 108.7 ?
    C6F C5F H5F2 . . 108.7 ?
    C4F C5F H5F2 . . 108.7 ?
    H5F1 C5F H5F2 . . 107.6 ?
    C5F C6F C7F . . 114.5(5) ?
    C5F C6F H6F1 . . 108.6 ?
    C7F C6F H6F1 . . 108.6 ?
    C5F C6F H6F2 . . 108.6 ?
    C7F C6F H6F2 . . 108.6 ?
    H6F1 C6F H6F2 . . 107.6 ?
    C6F C7F C8F . . 114.0(5) ?
    C6F C7F H7F1 . . 108.8 ?
    C8F C7F H7F1 . . 108.8 ?
    C6F C7F H7F2 . . 108.8 ?
    C8F C7F H7F2 . . 108.8 ?
    H7F1 C7F H7F2 . . 107.7 ?
    C9F C8F C7F . . 112.9(5) ?
    C9F C8F H8F1 . . 109.0 ?
    C7F C8F H8F1 . . 109.0 ?
    C9F C8F H8F2 . . 109.0 ?
    C7F C8F H8F2 . . 109.0 ?
    H8F1 C8F H8F2 . . 107.8 ?
    C8F C9F C10F . . 114.7(5) ?
    C8F C9F H9F1 . . 108.6 ?
    C10F C9F H9F1 . . 108.6 ?
    C8F C9F H9F2 . . 108.6 ?
    C10F C9F H9F2 . . 108.6 ?
    H9F1 C9F H9F2 . . 107.6 ?
    C9F C10F C11F . . 113.3(5) ?
    C9F C10F H10K . . 108.9 ?
    C11F C10F H10K . . 108.9 ?
    C9F C10F H10L . . 108.9 ?
    C11F C10F H10L . . 108.9 ?
    H10K C10F H10L . . 107.7 ?
    C12F C11F C10F . . 113.8(6) ?
    C12F C11F H11K . . 108.8 ?
    C10F C11F H11K . . 108.8 ?
    C12F C11F H11L . . 108.8 ?
    C10F C11F H11L . . 108.8 ?
    H11K C11F H11L . . 107.7 ?
    C11F C12F H12P . . 109.5 ?
    C11F C12F H12Q . . 109.5 ?
    H12P C12F H12Q . . 109.5 ?
    C11F C12F H12R . . 109.5 ?
    H12P C12F H12R . . 109.5 ?
    H12Q C12F H12R . . 109.5 ?

#===END

data_global
_audit_creation_method                  'APEX2 v2014.11-0'

_publ_requested_journal                 ?

_publ_contact_author_name               ?
_publ_contact_author_address            
;
;
_publ_contact_author_email              ?
_publ_contact_author_fax                ?
_publ_contact_author_phone              ?

_publ_section_title                     
;
;
_publ_section_abstract                  
;
;
_publ_section_references                
;
;
_publ_section_comment                   
;
;

data_I-AgSbF6
_chemical_name_systematic               ?
_chemical_name_common                   ?
_chemical_formula_moiety                ?
_chemical_formula_sum                   'C144 H300 Ag F6 Pt6 S12 Sb'
_chemical_formula_iupac                 ?
_chemical_formula_weight                3930.70

_chemical_melting_point                 ?

_space_group_crystal_system             triclinic
_space_group_name_H-M_alt               'P -1'
_space_group_name_Hall                  '-P 1'
loop_
    _space_group_symop_operation_xyz
    'x, y, z'
    '-x, -y, -z'

_cell_length_a                          15.6003(12)
_cell_length_b                          16.6218(13)
_cell_length_c                          31.954(3)
_cell_angle_alpha                       92.6717(11)
_cell_angle_beta                        93.2134(11)
_cell_angle_gamma                       95.2529(10)
_cell_volume                            8226.9(11)
_cell_formula_units_Z                   2
_cell_measurement_reflns_used           114
_cell_measurement_theta_min             3.5965
_cell_measurement_theta_max             22.2643
_cell_measurement_temperature           90.0(2)

_exptl_crystal_description              block
_exptl_crystal_colour                   orange
_exptl_crystal_size_max                 0.250
_exptl_crystal_size_mid                 0.140
_exptl_crystal_size_min                 0.140
_exptl_crystal_density_diffrn           1.587
_exptl_crystal_density_meas             ?
_exptl_crystal_density_method           'not measured'
_exptl_crystal_F_000                    3952

_exptl_absorpt_coefficient_mu           5.560
_exptl_absorpt_correction_type          multi-scan
_exptl_absorpt_process_details          'SADABS V2014/2 (Bruker AXS Inc.)'
_exptl_absorpt_correction_T_min         0.34
_exptl_absorpt_correction_T_max         0.51

_exptl_special_details                  
;
; 

_diffrn_ambient_temperature             90.0(2)

_diffrn_source                          'sealed tube'
_diffrn_source_type                     ?

_diffrn_radiation_type                  'Mo K\a'
_diffrn_radiation_wavelength            0.71073
_diffrn_radiation_monochromator         graphite

_diffrn_measurement_device_type         'Bruker D8 goniometer'
_diffrn_measurement_method              'omega scans'

_diffrn_detector_area_resol_mean        ?

_diffrn_reflns_number                   39947
_diffrn_reflns_av_R_equivalents         0.0473
_diffrn_reflns_av_unetI/netI            0.1281
_diffrn_reflns_theta_min                1.23
_diffrn_reflns_theta_max                25.03
_diffrn_reflns_theta_full               25.03
_diffrn_measured_fraction_theta_max     0.984
_diffrn_measured_fraction_theta_full    0.984
_diffrn_reflns_limit_h_min              -18
_diffrn_reflns_limit_h_max              18
_diffrn_reflns_limit_k_min              -19
_diffrn_reflns_limit_k_max              18
_diffrn_reflns_limit_l_min              -38
_diffrn_reflns_limit_l_max              27

_refine_special_details                 
;
;

_reflns_number_total                    28627
_reflns_number_gt                       14873
_reflns_threshold_expression            'I > 2\s(I)'

_refine_ls_structure_factor_coef        Fsqd
_refine_ls_matrix_type                  full
_refine_ls_R_factor_all                 0.1504
_refine_ls_R_factor_gt                  0.0638
_refine_ls_wR_factor_gt                 0.1523
_refine_ls_wR_factor_ref                0.2109
_refine_ls_goodness_of_fit_ref          0.988
_refine_ls_restrained_S_all             0.964
_refine_ls_number_reflns                28627
_refine_ls_number_parameters            1580
_refine_ls_number_restraints            1785
_refine_ls_number_constraints           ?
_refine_ls_hydrogen_treatment           constr
_refine_ls_weighting_scheme             calc
_refine_ls_weighting_details            
    'w=1/[\s^2^(Fo^2^)+(0.1059P)^2^+0.1499P] where P=(Fo^2^+2Fc^2^)/3'

_atom_sites_solution_hydrogens          geom
_atom_sites_solution_primary            ?
_atom_sites_solution_secondary          ?

_refine_ls_shift/su_max                 0.001
_refine_ls_shift/su_mean                0.000
_refine_diff_density_max                2.687
_refine_diff_density_min                -2.410
_refine_ls_extinction_method            none
_refine_ls_extinction_coef              ?

loop_
    _atom_type_symbol
    _atom_type_description
    _atom_type_scat_dispersion_real
    _atom_type_scat_dispersion_imag
    _atom_type_scat_source
    C C 0.0033 0.0016 'International Tables Vol C Tables 4.2.6.8 and 6.1.1.4'
    H H 0.0000 0.0000 'International Tables Vol C Tables 4.2.6.8 and 6.1.1.4'
    F F 0.0171 0.0103 'International Tables Vol C Tables 4.2.6.8 and 6.1.1.4'
    S S 0.1246 0.1234 'International Tables Vol C Tables 4.2.6.8 and 6.1.1.4'
    Ag Ag -0.8971 1.1015
     'International Tables Vol C Tables 4.2.6.8 and 6.1.1.4'
    Sb Sb -0.5866 1.5461
     'International Tables Vol C Tables 4.2.6.8 and 6.1.1.4'
    Pt Pt -1.7033 8.3905
     'International Tables Vol C Tables 4.2.6.8 and 6.1.1.4'

_computing_data_collection              'Bruker SMART APEXII'
_computing_cell_refinement              'APEX2 v2014.5-0 (Bruker AXS)'
_computing_data_reduction               'SAINT V8.34A (Bruker AXS Inc., 2013)'
_computing_structure_solution           'SHELXS-2013 (Sheldrick, 2013)'
_computing_structure_refinement         'SHELXL-2014 (Sheldrick, 2014)'
_computing_molecular_graphics           'XSHELL V6.3.1 (BruekrAXS)'
_computing_publication_material         'Generate Report (Bruker AXS)'

loop_
    _atom_site_type_symbol
    _atom_site_label
    _atom_site_fract_x
    _atom_site_fract_y
    _atom_site_fract_z
    _atom_site_U_iso_or_equiv
    _atom_site_adp_type
    _atom_site_calc_flag
    _atom_site_refinement_flags_adp
    _atom_site_refinement_flags_occupancy
    _atom_site_refinement_flags_posn
    _atom_site_occupancy
    _atom_site_disorder_assembly
    _atom_site_disorder_group
    Pt Pt1 0.23936(4) 0.93005(4) 0.96802(2) 0.02265(17) Uani d . . . 1.0 . .
    Pt Pt2 0.12842(4) 0.79254(4) 0.91280(2) 0.01904(16) Uani d . . . 1.0 . .
    Pt Pt3 0.14993(4) 0.61574(4) 0.92197(2) 0.01631(16) Uani d . . . 1.0 . .
    Pt Pt4 0.28993(4) 0.57840(4) 0.98821(2) 0.01646(16) Uani d . . . 1.0 . .
    Pt Pt5 0.39794(4) 0.71631(4) 1.04412(2) 0.01768(16) Uani d . . . 1.0 . .
    Pt Pt6 0.37731(4) 0.89331(4) 1.03651(2) 0.02077(17) Uani d . . . 1.0 . .
    S S1 0.0931(3) 0.8929(3) 0.96016(14) 0.0272(10) Uani d . . . 1.0 . .
    S S2 0.2346(3) 0.8922(2) 0.89734(13) 0.0225(10) Uani d . . . 1.0 . .
    S S3 0.1538(2) 0.6923(2) 0.86300(12) 0.0203(9) Uani d . . . 1.0 . .
    S S4 0.0315(3) 0.6892(3) 0.93388(13) 0.0221(10) Uani d . . . 1.0 . .
    S S5 0.1432(2) 0.5386(2) 0.98069(12) 0.0178(9) Uani d . . . 1.0 . .
    S S6 0.2800(2) 0.5600(2) 0.91571(12) 0.0181(9) Uani d . . . 1.0 . .
    S S7 0.4355(2) 0.6218(2) 0.99441(12) 0.0170(9) Uani d . . . 1.0 . .
    S S8 0.2965(2) 0.6132(2) 1.05926(12) 0.0185(9) Uani d . . . 1.0 . .
    S S9 0.3668(3) 0.8142(3) 1.09424(13) 0.0282(11) Uani d . . . 1.0 . .
    S S10 0.4970(3) 0.8215(2) 1.02713(13) 0.0220(10) Uani d . . . 1.0 . .
    S S11 0.3867(3) 0.9675(2) 0.97753(13) 0.0225(10) Uani d . . . 1.0 . .
    S S12 0.2468(3) 0.9489(3) 1.04012(14) 0.0270(10) Uani d . . . 1.0 . .
    Ag Ag1 0.26267(7) 0.75214(8) 0.97835(4) 0.0182(3) Uani d . . . 1.0 . .
    C C1A 0.0563(16) 0.8474(16) 1.0066(8) 0.080(5) Uani d U . . 1.0 . .
    H H1A1 0.0124 0.8019 0.998 0.096 Uiso calc U . R 1.0 . .
    H H1A2 0.1056 0.8243 1.021 0.096 Uiso calc U . R 1.0 . .
    C C2A 0.0192(16) 0.9012(15) 1.0369(6) 0.087(4) Uani d U . D 1.0 . .
    H H2A1 -0.0382 0.9159 1.0268 0.104 Uiso calc U . R 1.0 . .
    H H2A2 0.0579 0.9507 1.0448 0.104 Uiso calc U . R 1.0 . .
    C C3A 0.0137(15) 0.8407(15) 1.0731(6) 0.095(4) Uani d U . D 1.0 . .
    H H3A1 -0.0004 0.7849 1.0608 0.114 Uiso calc U . R 1.0 . .
    H H3A2 0.0704 0.843 1.0888 0.114 Uiso calc U . R 1.0 . .
    C C4A -0.0524(15) 0.8602(15) 1.1020(6) 0.097(4) Uani d U . D 1.0 . .
    H H4A1 -0.1088 0.8586 1.086 0.117 Uiso calc U . R 1.0 . .
    H H4A2 -0.0379 0.916 1.1141 0.117 Uiso calc U . R 1.0 . .
    C C5A -0.0608(16) 0.8021(12) 1.1379(6) 0.092(4) Uani d U . D 1.0 . .
    H H5A1 -0.1017 0.7545 1.129 0.111 Uiso calc U . R 1.0 . .
    H H5A2 -0.0041 0.783 1.1457 0.111 Uiso calc U . R 1.0 . .
    C C6A -0.0940(16) 0.8484(12) 1.1754(6) 0.088(4) Uani d U . D 1.0 . .
    H H6A1 -0.0472 0.8881 1.1878 0.106 Uiso calc U . R 1.0 . .
    H H6A2 -0.1421 0.8788 1.1654 0.106 Uiso calc U . R 1.0 . .
    C C7A -0.1246(16) 0.7945(15) 1.2087(6) 0.083(4) Uani d U . D 1.0 . .
    H H7A1 -0.1726 0.7552 1.1972 0.099 Uiso calc U . R 1.0 . .
    H H7A2 -0.0771 0.7641 1.2196 0.099 Uiso calc U . R 1.0 . .
    C C8A -0.1530(16) 0.8453(16) 1.2415(8) 0.080(4) Uani d U . . 1.0 . .
    H H8A1 -0.1938 0.8813 1.2293 0.096 Uiso calc U . R 1.0 . .
    H H8A2 -0.1027 0.8798 1.2548 0.096 Uiso calc U . R 1.0 . .
    C C9A -0.1944(16) 0.7997(16) 1.2731(8) 0.080(4) Uani d U . . 1.0 . .
    H H9A1 -0.1515 0.7663 1.2858 0.095 Uiso calc U . R 1.0 . .
    H H9A2 -0.2407 0.762 1.2587 0.095 Uiso calc U . R 1.0 . .
    C C10A -0.2315(16) 0.8425(16) 1.3067(8) 0.080(4) Uani d U . . 1.0 . .
    H H10A -0.1844 0.8806 1.3202 0.096 Uiso calc U . R 1.0 . .
    H H10B -0.2733 0.8761 1.2933 0.096 Uiso calc U . R 1.0 . .
    C C11A -0.2734(16) 0.8056(16) 1.3395(8) 0.082(4) Uani d U . . 1.0 . .
    H H11A -0.231 0.7732 1.3534 0.099 Uiso calc U . R 1.0 . .
    H H11B -0.3194 0.7663 1.326 0.099 Uiso calc U . R 1.0 . .
    C C12A -0.3143(16) 0.8499(16) 1.3742(8) 0.086(6) Uani d U . . 1.0 . .
    H H12A -0.2729 0.8933 1.387 0.129 Uiso calc U . R 1.0 . .
    H H12B -0.3311 0.8121 1.3956 0.129 Uiso calc U . R 1.0 . .
    H H12C -0.3655 0.8733 1.3627 0.129 Uiso calc U . R 1.0 . .
    C C1B 0.1771(11) 0.9654(11) 0.8676(5) 0.034(3) Uani d U . . 1.0 . .
    H H1B1 0.1201 0.9703 0.8792 0.041 Uiso calc U . R 1.0 . .
    H H1B2 0.2104 1.0192 0.871 0.041 Uiso calc U . R 1.0 . .
    C C2B 0.1645(11) 0.9400(11) 0.8216(5) 0.036(3) Uani d U . . 1.0 . .
    H H2B1 0.1247 0.9754 0.808 0.043 Uiso calc U . R 1.0 . .
    H H2B2 0.1363 0.8841 0.8188 0.043 Uiso calc U . R 1.0 . .
    C C3B 0.2472(11) 0.9431(11) 0.7978(5) 0.038(3) Uani d U . . 1.0 . .
    H H3B1 0.2774 0.9981 0.8023 0.045 Uiso calc U . R 1.0 . .
    H H3B2 0.2853 0.9049 0.8102 0.045 Uiso calc U . R 1.0 . .
    C C4B 0.2349(11) 0.9234(12) 0.7517(6) 0.039(3) Uani d U . . 1.0 . .
    H H4B1 0.1944 0.9597 0.7394 0.047 Uiso calc U . R 1.0 . .
    H H4B2 0.2078 0.8673 0.7471 0.047 Uiso calc U . R 1.0 . .
    C C5B 0.3178(11) 0.9314(12) 0.7284(6) 0.040(3) Uani d U . . 1.0 . .
    H H5B1 0.3454 0.9873 0.7334 0.048 Uiso calc U . R 1.0 . .
    H H5B2 0.3579 0.8944 0.7403 0.048 Uiso calc U . R 1.0 . .
    C C6B 0.3049(11) 0.9130(12) 0.6820(6) 0.042(3) Uani d U . . 1.0 . .
    H H6B1 0.2642 0.9492 0.6698 0.05 Uiso calc U . R 1.0 . .
    H H6B2 0.279 0.8565 0.6766 0.05 Uiso calc U . R 1.0 . .
    C C7B 0.3916(11) 0.9242(12) 0.6599(6) 0.042(3) Uani d U . . 1.0 . .
    H H7B1 0.417 0.9808 0.6652 0.051 Uiso calc U . R 1.0 . .
    H H7B2 0.4323 0.8885 0.6725 0.051 Uiso calc U . R 1.0 . .
    C C8B 0.3812(12) 0.9051(12) 0.6127(6) 0.045(3) Uani d U . . 1.0 . .
    H H8B1 0.3572 0.848 0.6074 0.054 Uiso calc U . R 1.0 . .
    H H8B2 0.3391 0.9397 0.6003 0.054 Uiso calc U . R 1.0 . .
    C C9B 0.4636(12) 0.9178(13) 0.5912(6) 0.047(3) Uani d U . . 1.0 . .
    H H9B1 0.5069 0.8865 0.6054 0.057 Uiso calc U . R 1.0 . .
    H H9B2 0.4852 0.9757 0.5949 0.057 Uiso calc U . R 1.0 . .
    C C10B 0.4574(13) 0.8936(13) 0.5446(6) 0.051(3) Uani d U . . 1.0 . .
    H H10C 0.4345 0.836 0.5407 0.061 Uiso calc U . R 1.0 . .
    H H10D 0.4157 0.9261 0.5302 0.061 Uiso calc U . R 1.0 . .
    C C11B 0.5425(13) 0.9050(14) 0.5240(6) 0.055(3) Uani d U . . 1.0 . .
    H H11C 0.5833 0.8719 0.5387 0.066 Uiso calc U . R 1.0 . .
    H H11D 0.5655 0.9623 0.5291 0.066 Uiso calc U . R 1.0 . .
    C C12B 0.5430(14) 0.8841(14) 0.4771(7) 0.063(5) Uani d U . . 1.0 . .
    H H12D 0.5135 0.83 0.4706 0.094 Uiso calc U . R 1.0 . .
    H H12E 0.6027 0.8851 0.4689 0.094 Uiso calc U . R 1.0 . .
    H H12F 0.5132 0.9238 0.4615 0.094 Uiso calc U . R 1.0 . .
    C C1C 0.2618(10) 0.7079(11) 0.8425(5) 0.029(3) Uani d U . . 1.0 . .
    H H1C1 0.2855 0.765 0.8479 0.035 Uiso calc U . R 1.0 . .
    H H1C2 0.3013 0.6729 0.8565 0.035 Uiso calc U . R 1.0 . .
    C C2C 0.2535(10) 0.6869(11) 0.7956(5) 0.032(3) Uani d U . . 1.0 . .
    H H2C1 0.2123 0.7212 0.7821 0.038 Uiso calc U . R 1.0 . .
    H H2C2 0.2297 0.6298 0.7907 0.038 Uiso calc U . R 1.0 . .
    C C3C 0.3400(10) 0.6992(11) 0.7752(5) 0.031(3) Uani d U . . 1.0 . .
    H H3C1 0.3651 0.7556 0.7815 0.038 Uiso calc U . R 1.0 . .
    H H3C2 0.3801 0.663 0.7877 0.038 Uiso calc U . R 1.0 . .
    C C4C 0.3327(11) 0.6831(11) 0.7291(5) 0.034(3) Uani d U . . 1.0 . .
    H H4C1 0.2927 0.7196 0.7165 0.041 Uiso calc U . R 1.0 . .
    H H4C2 0.3072 0.6268 0.7228 0.041 Uiso calc U . R 1.0 . .
    C C5C 0.4191(11) 0.6950(11) 0.7084(5) 0.036(3) Uani d U . . 1.0 . .
    H H5C1 0.4449 0.7511 0.715 0.043 Uiso calc U . R 1.0 . .
    H H5C2 0.4588 0.658 0.7206 0.043 Uiso calc U . R 1.0 . .
    C C6C 0.4117(11) 0.6799(12) 0.6621(5) 0.038(3) Uani d U . . 1.0 . .
    H H6C1 0.3716 0.7165 0.6498 0.045 Uiso calc U . R 1.0 . .
    H H6C2 0.3866 0.6236 0.6554 0.045 Uiso calc U . R 1.0 . .
    C C7C 0.4975(11) 0.6927(12) 0.6418(5) 0.038(3) Uani d U . . 1.0 . .
    H H7C1 0.5379 0.6574 0.655 0.045 Uiso calc U . R 1.0 . .
    H H7C2 0.5217 0.7494 0.6481 0.045 Uiso calc U . R 1.0 . .
    C C8C 0.4940(11) 0.6756(12) 0.5939(6) 0.040(3) Uani d U . . 1.0 . .
    H H8C1 0.4709 0.6187 0.5873 0.048 Uiso calc U . R 1.0 . .
    H H8C2 0.4537 0.7106 0.5805 0.048 Uiso calc U . R 1.0 . .
    C C9C 0.5814(12) 0.6901(12) 0.5754(6) 0.043(3) Uani d U . . 1.0 . .
    H H9C1 0.621 0.6531 0.5877 0.051 Uiso calc U . R 1.0 . .
    H H9C2 0.6059 0.7463 0.5831 0.051 Uiso calc U . R 1.0 . .
    C C10C 0.5755(12) 0.6766(13) 0.5267(6) 0.046(3) Uani d U . . 1.0 . .
    H H10E 0.5536 0.6197 0.519 0.055 Uiso calc U . R 1.0 . .
    H H10F 0.534 0.7119 0.5144 0.055 Uiso calc U . R 1.0 . .
    C C11C 0.6622(12) 0.6948(13) 0.5084(6) 0.049(3) Uani d U . . 1.0 . .
    H H11E 0.7031 0.658 0.5198 0.058 Uiso calc U . R 1.0 . .
    H H11F 0.6851 0.751 0.517 0.058 Uiso calc U . R 1.0 . .
    C C12C 0.6560(13) 0.6846(13) 0.4603(6) 0.057(5) Uani d U . . 1.0 . .
    H H12G 0.6403 0.6276 0.4517 0.085 Uiso calc U . R 1.0 . .
    H H12H 0.7118 0.7025 0.4496 0.085 Uiso calc U . R 1.0 . .
    H H12I 0.6119 0.7173 0.4489 0.085 Uiso calc U . R 1.0 . .
    C C1D -0.0475(9) 0.6644(9) 0.8894(5) 0.021(3) Uani d U . . 1.0 . .
    H H1D1 -0.0182 0.6406 0.8657 0.025 Uiso calc U . R 1.0 . .
    H H1D2 -0.0924 0.6231 0.8976 0.025 Uiso calc U . R 1.0 . .
    C C2D -0.0890(10) 0.7350(10) 0.8752(5) 0.024(2) Uani d U . . 1.0 . .
    H H2D1 -0.0447 0.7758 0.8659 0.029 Uiso calc U . R 1.0 . .
    H H2D2 -0.1175 0.7599 0.8988 0.029 Uiso calc U . R 1.0 . .
    C C3D -0.1561(10) 0.7099(10) 0.8388(5) 0.027(2) Uani d U . . 1.0 . .
    H H3D1 -0.2025 0.6729 0.8494 0.032 Uiso calc U . R 1.0 . .
    H H3D2 -0.1824 0.7588 0.8298 0.032 Uiso calc U . R 1.0 . .
    C C4D -0.1218(10) 0.6681(10) 0.8001(5) 0.028(2) Uani d U . . 1.0 . .
    H H4D1 -0.094 0.62 0.809 0.034 Uiso calc U . R 1.0 . .
    H H4D2 -0.1712 0.649 0.7802 0.034 Uiso calc U . R 1.0 . .
    C C5D -0.0575(11) 0.7211(10) 0.7772(5) 0.030(2) Uani d U . . 1.0 . .
    H H5D1 -0.086 0.7679 0.767 0.036 Uiso calc U . R 1.0 . .
    H H5D2 -0.0093 0.7424 0.7973 0.036 Uiso calc U . R 1.0 . .
    C C6D -0.0219(11) 0.6785(10) 0.7411(5) 0.030(2) Uani d U . . 1.0 . .
    H H6D1 -0.0699 0.6454 0.7251 0.036 Uiso calc U . R 1.0 . .
    H H6D2 0.0186 0.641 0.7522 0.036 Uiso calc U . R 1.0 . .
    C C7D 0.0251(11) 0.7331(11) 0.7110(5) 0.033(3) Uani d U . . 1.0 . .
    H H7D1 -0.016 0.7688 0.6988 0.04 Uiso calc U . R 1.0 . .
    H H7D2 0.0716 0.7679 0.7271 0.04 Uiso calc U . R 1.0 . .
    C C8D 0.0640(11) 0.6881(11) 0.6756(5) 0.036(3) Uani d U . . 1.0 . .
    H H8D1 0.0191 0.6487 0.6613 0.043 Uiso calc U . R 1.0 . .
    H H8D2 0.1103 0.6574 0.6874 0.043 Uiso calc U . R 1.0 . .
    C C9D 0.1017(12) 0.7445(11) 0.6431(6) 0.040(3) Uani d U . . 1.0 . .
    H H9D1 0.0545 0.7714 0.6293 0.048 Uiso calc U . R 1.0 . .
    H H9D2 0.1427 0.7871 0.6577 0.048 Uiso calc U . R 1.0 . .
    C C10D 0.1479(12) 0.7002(12) 0.6099(6) 0.043(3) Uani d U . . 1.0 . .
    H H10G 0.1092 0.6534 0.5977 0.052 Uiso calc U . R 1.0 . .
    H H10H 0.1995 0.6791 0.6233 0.052 Uiso calc U . R 1.0 . .
    C C11D 0.1762(12) 0.7556(12) 0.5739(6) 0.046(3) Uani d U . . 1.0 . .
    H H11G 0.1241 0.77 0.558 0.055 Uiso calc U . R 1.0 . .
    H H11H 0.2072 0.8064 0.5866 0.055 Uiso calc U . R 1.0 . .
    C C12D 0.2319(12) 0.7182(13) 0.5448(6) 0.051(4) Uani d U . . 1.0 . .
    H H12J 0.2778 0.6943 0.5607 0.076 Uiso calc U . R 1.0 . .
    H H12K 0.2575 0.7594 0.527 0.076 Uiso calc U . R 1.0 . .
    H H12L 0.1976 0.6759 0.5271 0.076 Uiso calc U . R 1.0 . .
    C C1E 0.0889(10) 0.5924(10) 1.0220(5) 0.022(3) Uani d U . . 1.0 . .
    H H1E1 0.1232 0.6443 1.0303 0.027 Uiso calc U . R 1.0 . .
    H H1E2 0.0316 0.6049 1.0105 0.027 Uiso calc U . R 1.0 . .
    C C2E 0.0776(10) 0.5440(10) 1.0599(5) 0.021(2) Uani d U . . 1.0 . .
    H H2E1 0.1337 0.5254 1.0694 0.025 Uiso calc U . R 1.0 . .
    H H2E2 0.0366 0.4957 1.0527 0.025 Uiso calc U . R 1.0 . .
    C C3E 0.0438(10) 0.5945(9) 1.0953(5) 0.021(2) Uani d U . . 1.0 . .
    H H3E1 -0.0103 0.616 1.0851 0.025 Uiso calc U . R 1.0 . .
    H H3E2 0.0866 0.641 1.1036 0.025 Uiso calc U . R 1.0 . .
    C C4E 0.0266(10) 0.5443(10) 1.1336(5) 0.021(2) Uani d U . . 1.0 . .
    H H4E1 -0.0146 0.4968 1.1249 0.026 Uiso calc U . R 1.0 . .
    H H4E2 0.0812 0.524 1.144 0.026 Uiso calc U . R 1.0 . .
    C C5E -0.0094(10) 0.5917(9) 1.1687(5) 0.020(2) Uani d U . . 1.0 . .
    H H5E1 -0.0615 0.6156 1.1578 0.025 Uiso calc U . R 1.0 . .
    H H5E2 0.0337 0.6367 1.1791 0.025 Uiso calc U . R 1.0 . .
    C C6E -0.0335(10) 0.5378(9) 1.2064(5) 0.020(2) Uani d U . . 1.0 . .
    H H6E1 -0.0735 0.4909 1.1956 0.024 Uiso calc U . R 1.0 . .
    H H6E2 0.0195 0.5168 1.2183 0.024 Uiso calc U . R 1.0 . .
    C C7E -0.0747(10) 0.5825(9) 1.2406(5) 0.021(2) Uani d U . . 1.0 . .
    H H7E1 -0.1264 0.6052 1.2284 0.025 Uiso calc U . R 1.0 . .
    H H7E2 -0.0338 0.6285 1.252 0.025 Uiso calc U . R 1.0 . .
    C C8E -0.1014(10) 0.5306(10) 1.2768(5) 0.024(2) Uani d U . . 1.0 . .
    H H8E1 -0.141 0.4839 1.2652 0.029 Uiso calc U . R 1.0 . .
    H H8E2 -0.0493 0.5089 1.2893 0.029 Uiso calc U . R 1.0 . .
    C C9E -0.1440(10) 0.5729(10) 1.3105(5) 0.028(2) Uani d U . . 1.0 . .
    H H9E1 -0.1962 0.5945 1.2981 0.033 Uiso calc U . R 1.0 . .
    H H9E2 -0.1045 0.6196 1.3222 0.033 Uiso calc U . R 1.0 . .
    C C10E -0.1698(11) 0.5204(11) 1.3461(5) 0.032(3) Uani d U . . 1.0 . .
    H H10I -0.118 0.4969 1.3577 0.039 Uiso calc U . R 1.0 . .
    H H10J -0.2113 0.4751 1.3346 0.039 Uiso calc U . R 1.0 . .
    C C11E -0.2101(11) 0.5644(11) 1.3817(5) 0.037(3) Uani d U . . 1.0 . .
    H H11I -0.2635 0.5861 1.3706 0.044 Uiso calc U . R 1.0 . .
    H H11J -0.1697 0.6108 1.3929 0.044 Uiso calc U . R 1.0 . .
    C C12E -0.2320(12) 0.5089(12) 1.4176(6) 0.046(4) Uani d U . . 1.0 . .
    H H12M -0.2731 0.4635 1.4068 0.069 Uiso calc U . R 1.0 . .
    H H12N -0.2577 0.5397 1.4398 0.069 Uiso calc U . R 1.0 . .
    H H12O -0.1792 0.4882 1.429 0.069 Uiso calc U . R 1.0 . .
    C C1F 0.2570(9) 0.4511(9) 0.9017(4) 0.018(3) Uani d U . . 1.0 . .
    H H1F1 0.3039 0.4211 0.9135 0.021 Uiso calc U . R 1.0 . .
    H H1F2 0.2023 0.4303 0.9133 0.021 Uiso calc U . R 1.0 . .
    C C2F 0.2499(9) 0.4387(9) 0.8531(5) 0.019(2) Uani d U . . 1.0 . .
    H H2F1 0.2269 0.3821 0.8454 0.022 Uiso calc U . R 1.0 . .
    H H2F2 0.2081 0.4745 0.8415 0.022 Uiso calc U . R 1.0 . .
    C C3F 0.3365(9) 0.4564(10) 0.8326(5) 0.022(2) Uani d U . . 1.0 . .
    H H3F1 0.3578 0.5139 0.8386 0.026 Uiso calc U . R 1.0 . .
    H H3F2 0.3795 0.423 0.8452 0.026 Uiso calc U . R 1.0 . .
    C C4F 0.3288(10) 0.4392(10) 0.7867(5) 0.026(2) Uani d U . . 1.0 . .
    H H4F1 0.284 0.4712 0.7746 0.031 Uiso calc U . R 1.0 . .
    H H4F2 0.3083 0.3813 0.7811 0.031 Uiso calc U . R 1.0 . .
    C C5F 0.4129(10) 0.4575(11) 0.7634(5) 0.030(2) Uani d U . . 1.0 . .
    H H5F1 0.4337 0.5153 0.7691 0.036 Uiso calc U . R 1.0 . .
    H H5F2 0.4576 0.425 0.7752 0.036 Uiso calc U . R 1.0 . .
    C C6F 0.4035(11) 0.4402(11) 0.7164(5) 0.034(3) Uani d U . . 1.0 . .
    H H6F1 0.3619 0.4754 0.7041 0.041 Uiso calc U . R 1.0 . .
    H H6F2 0.3796 0.3834 0.7105 0.041 Uiso calc U . R 1.0 . .
    C C7F 0.4886(11) 0.4542(12) 0.6952(5) 0.037(3) Uani d U . . 1.0 . .
    H H7F1 0.5297 0.418 0.707 0.045 Uiso calc U . R 1.0 . .
    H H7F2 0.5133 0.5106 0.7019 0.045 Uiso calc U . R 1.0 . .
    C C8F 0.4797(11) 0.4392(12) 0.6473(6) 0.040(3) Uani d U . . 1.0 . .
    H H8F1 0.4567 0.3823 0.6404 0.048 Uiso calc U . R 1.0 . .
    H H8F2 0.438 0.4746 0.6353 0.048 Uiso calc U . R 1.0 . .
    C C9F 0.5660(11) 0.4559(12) 0.6278(6) 0.041(3) Uani d U . . 1.0 . .
    H H9F1 0.6077 0.4213 0.6405 0.049 Uiso calc U . R 1.0 . .
    H H9F2 0.5882 0.513 0.6346 0.049 Uiso calc U . R 1.0 . .
    C C10F 0.5611(12) 0.4402(12) 0.5793(6) 0.042(3) Uani d U . . 1.0 . .
    H H10K 0.5383 0.3834 0.5723 0.051 Uiso calc U . R 1.0 . .
    H H10L 0.5205 0.4756 0.5664 0.051 Uiso calc U . R 1.0 . .
    C C11F 0.6493(11) 0.4562(12) 0.5609(6) 0.043(3) Uani d U . . 1.0 . .
    H H11K 0.6708 0.5137 0.567 0.051 Uiso calc U . R 1.0 . .
    H H11L 0.6905 0.4226 0.5748 0.051 Uiso calc U . R 1.0 . .
    C C12F 0.6463(12) 0.4377(13) 0.5140(6) 0.049(4) Uani d U . . 1.0 . .
    H H12P 0.6228 0.3815 0.5076 0.073 Uiso calc U . R 1.0 . .
    H H12Q 0.7047 0.4457 0.5041 0.073 Uiso calc U . R 1.0 . .
    H H12R 0.6094 0.474 0.4998 0.073 Uiso calc U . R 1.0 . .
    C C1G 0.4655(10) 0.6796(9) 0.9492(5) 0.021(3) Uani d U . . 1.0 . .
    H H1G1 0.4133 0.7008 0.9365 0.025 Uiso calc U . R 1.0 . .
    H H1G2 0.5066 0.7265 0.959 0.025 Uiso calc U . R 1.0 . .
    C C2G 0.5065(10) 0.6295(10) 0.9157(5) 0.022(2) Uani d U . . 1.0 . .
    H H2G1 0.5594 0.6091 0.928 0.026 Uiso calc U . R 1.0 . .
    H H2G2 0.4658 0.5824 0.9057 0.026 Uiso calc U . R 1.0 . .
    C C3G 0.5284(10) 0.6803(10) 0.8794(5) 0.022(2) Uani d U . . 1.0 . .
    H H3G1 0.5669 0.7284 0.8902 0.027 Uiso calc U . R 1.0 . .
    H H3G2 0.4747 0.6999 0.8674 0.027 Uiso calc U . R 1.0 . .
    C C4G 0.5720(10) 0.6377(10) 0.8442(5) 0.024(2) Uani d U . . 1.0 . .
    H H4G1 0.5316 0.5922 0.8319 0.029 Uiso calc U . R 1.0 . .
    H H4G2 0.6233 0.6144 0.8566 0.029 Uiso calc U . R 1.0 . .
    C C5G 0.6007(10) 0.6914(10) 0.8086(5) 0.027(2) Uani d U . . 1.0 . .
    H H5G1 0.5507 0.7177 0.7972 0.032 Uiso calc U . R 1.0 . .
    H H5G2 0.6449 0.7344 0.8201 0.032 Uiso calc U . R 1.0 . .
    C C6G 0.6372(10) 0.6433(10) 0.7737(5) 0.027(2) Uani d U . . 1.0 . .
    H H6G1 0.5907 0.6047 0.76 0.032 Uiso calc U . R 1.0 . .
    H H6G2 0.6821 0.6115 0.7858 0.032 Uiso calc U . R 1.0 . .
    C C7G 0.6759(10) 0.6956(10) 0.7407(5) 0.028(2) Uani d U . . 1.0 . .
    H H7G1 0.722 0.7345 0.7544 0.033 Uiso calc U . R 1.0 . .
    H H7G2 0.6308 0.7271 0.7284 0.033 Uiso calc U . R 1.0 . .
    C C8G 0.7136(10) 0.6466(10) 0.7054(5) 0.029(2) Uani d U . . 1.0 . .
    H H8G1 0.7559 0.6123 0.7179 0.035 Uiso calc U . R 1.0 . .
    H H8G2 0.6667 0.6103 0.6905 0.035 Uiso calc U . R 1.0 . .
    C C9G 0.7574(11) 0.6984(11) 0.6740(5) 0.032(3) Uani d U . . 1.0 . .
    H H9G1 0.802 0.7375 0.6888 0.038 Uiso calc U . R 1.0 . .
    H H9G2 0.7145 0.7295 0.6595 0.038 Uiso calc U . R 1.0 . .
    C C10G 0.7994(11) 0.6461(11) 0.6416(5) 0.034(3) Uani d U . . 1.0 . .
    H H10M 0.7543 0.6071 0.6272 0.04 Uiso calc U . R 1.0 . .
    H H10N 0.8415 0.6148 0.6565 0.04 Uiso calc U . R 1.0 . .
    C C11G 0.8459(11) 0.6957(11) 0.6084(5) 0.037(3) Uani d U . . 1.0 . .
    H H11M 0.8036 0.7265 0.5932 0.045 Uiso calc U . R 1.0 . .
    H H11N 0.8904 0.7353 0.6228 0.045 Uiso calc U . R 1.0 . .
    C C12G 0.8884(12) 0.6443(12) 0.5767(6) 0.045(4) Uani d U . . 1.0 . .
    H H12S 0.9288 0.6119 0.5914 0.068 Uiso calc U . R 1.0 . .
    H H12T 0.9197 0.6794 0.5577 0.068 Uiso calc U . R 1.0 . .
    H H12U 0.8442 0.6082 0.5604 0.068 Uiso calc U . R 1.0 . .
    C C1H 0.3584(10) 0.5417(10) 1.0860(5) 0.023(3) Uani d U . . 1.0 . .
    H H1H1 0.326 0.4874 1.0835 0.028 Uiso calc U . R 1.0 . .
    H H1H2 0.4137 0.538 1.0726 0.028 Uiso calc U . R 1.0 . .
    C C2H 0.3759(10) 0.5685(10) 1.1321(5) 0.025(2) Uani d U . . 1.0 . .
    H H2H1 0.4203 0.5365 1.1447 0.03 Uiso calc U . R 1.0 . .
    H H2H2 0.3991 0.6262 1.1343 0.03 Uiso calc U . R 1.0 . .
    C C3H 0.2956(10) 0.5581(10) 1.1563(5) 0.027(2) Uani d U . . 1.0 . .
    H H3H1 0.2721 0.5006 1.1531 0.033 Uiso calc U . R 1.0 . .
    H H3H2 0.2519 0.5906 1.1435 0.033 Uiso calc U . R 1.0 . .
    C C4H 0.3081(10) 0.5821(11) 1.2028(5) 0.029(2) Uani d U . . 1.0 . .
    H H4H1 0.3527 0.5506 1.2156 0.034 Uiso calc U . R 1.0 . .
    H H4H2 0.3298 0.64 1.2062 0.034 Uiso calc U . R 1.0 . .
    C C5H 0.2269(10) 0.5686(11) 1.2260(5) 0.030(2) Uani d U . . 1.0 . .
    H H5H1 0.2026 0.5116 1.2206 0.036 Uiso calc U . R 1.0 . .
    H H5H2 0.184 0.6035 1.2147 0.036 Uiso calc U . R 1.0 . .
    C C6H 0.2402(10) 0.5860(11) 1.2731(5) 0.031(2) Uani d U . . 1.0 . .
    H H6H1 0.2638 0.643 1.2787 0.038 Uiso calc U . R 1.0 . .
    H H6H2 0.2833 0.5513 1.2846 0.038 Uiso calc U . R 1.0 . .
    C C7H 0.1555(10) 0.5708(11) 1.2963(5) 0.032(2) Uani d U . . 1.0 . .
    H H7H1 0.1125 0.6056 1.2849 0.038 Uiso calc U . R 1.0 . .
    H H7H2 0.1319 0.5138 1.2907 0.038 Uiso calc U . R 1.0 . .
    C C8H 0.1694(11) 0.5882(11) 1.3431(5) 0.033(3) Uani d U . . 1.0 . .
    H H8H1 0.193 0.6453 1.3485 0.04 Uiso calc U . R 1.0 . .
    H H8H2 0.2131 0.5538 1.3542 0.04 Uiso calc U . R 1.0 . .
    C C9H 0.0876(11) 0.5734(11) 1.3671(5) 0.035(3) Uani d U . . 1.0 . .
    H H9H1 0.0433 0.6066 1.3555 0.042 Uiso calc U . R 1.0 . .
    H H9H2 0.0649 0.5159 1.3624 0.042 Uiso calc U . R 1.0 . .
    C C10H 0.1011(11) 0.5931(12) 1.4141(5) 0.037(3) Uani d U . . 1.0 . .
    H H10O 0.1456 0.5602 1.4258 0.045 Uiso calc U . R 1.0 . .
    H H10P 0.123 0.6507 1.4189 0.045 Uiso calc U . R 1.0 . .
    C C11H 0.0195(11) 0.5772(12) 1.4373(6) 0.041(3) Uani d U . . 1.0 . .
    H H11O -0.0012 0.5191 1.4336 0.049 Uiso calc U . R 1.0 . .
    H H11P -0.0258 0.6085 1.425 0.049 Uiso calc U . R 1.0 . .
    C C12H 0.0337(12) 0.6005(12) 1.4843(6) 0.043(4) Uani d U . . 1.0 . .
    H H22C 0.0788 0.57 1.4966 0.064 Uiso calc U . R 1.0 . .
    H H22A -0.0201 0.5878 1.4981 0.064 Uiso calc U . R 1.0 . .
    H H22B 0.0514 0.6586 1.4882 0.064 Uiso calc U . R 1.0 . .
    C C1I 0.2568(12) 0.7974(13) 1.1124(6) 0.053(4) Uani d U . . 1.0 . .
    H H1I1 0.2184 0.8339 1.0987 0.063 Uiso calc U . R 1.0 . .
    H H1I2 0.2328 0.7407 1.1058 0.063 Uiso calc U . R 1.0 . .
    C C2I 0.2654(13) 0.8165(14) 1.1622(6) 0.058(3) Uani d U . . 1.0 . .
    H H2I1 0.3074 0.7823 1.175 0.069 Uiso calc U . R 1.0 . .
    H H2I2 0.2879 0.8738 1.1681 0.069 Uiso calc U . R 1.0 . .
    C C3I 0.1880(14) 0.8025(14) 1.1802(7) 0.061(3) Uani d U . . 1.0 . .
    H H3I1 0.1637 0.746 1.1734 0.074 Uiso calc U . R 1.0 . .
    H H3I2 0.1466 0.839 1.1689 0.074 Uiso calc U . R 1.0 . .
    C C4I 0.2022(14) 0.8179(14) 1.2289(7) 0.063(3) Uani d U . . 1.0 . .
    H H4I1 0.244 0.7815 1.2399 0.076 Uiso calc U . R 1.0 . .
    H H4I2 0.2269 0.8744 1.2354 0.076 Uiso calc U . R 1.0 . .
    C C5I 0.1251(14) 0.8044(15) 1.2485(7) 0.065(3) Uani d U . . 1.0 . .
    H H5I1 0.0991 0.7489 1.2402 0.078 Uiso calc U . R 1.0 . .
    H H5I2 0.0848 0.8426 1.2381 0.078 Uiso calc U . R 1.0 . .
    C C6I 0.1343(14) 0.8138(15) 1.2967(7) 0.065(3) Uani d U . . 1.0 . .
    H H6I1 0.1734 0.7747 1.3074 0.078 Uiso calc U . R 1.0 . .
    H H6I2 0.1607 0.869 1.3052 0.078 Uiso calc U . R 1.0 . .
    C C7I 0.0523(14) 0.8005(15) 1.3154(7) 0.065(3) Uani d U . . 1.0 . .
    H H7I1 0.0274 0.7442 1.3085 0.078 Uiso calc U . R 1.0 . .
    H H7I2 0.0119 0.8373 1.3035 0.078 Uiso calc U . R 1.0 . .
    C C8I 0.0620(14) 0.8152(15) 1.3632(7) 0.067(3) Uani d U . . 1.0 . .
    H H8I1 0.1047 0.7801 1.3746 0.08 Uiso calc U . R 1.0 . .
    H H8I2 0.0852 0.8721 1.3698 0.08 Uiso calc U . R 1.0 . .
    C C9I -0.0208(14) 0.7992(15) 1.3853(7) 0.070(3) Uani d U . . 1.0 . .
    H H9I1 -0.0634 0.8345 1.374 0.084 Uiso calc U . R 1.0 . .
    H H9I2 -0.0442 0.7424 1.3785 0.084 Uiso calc U . R 1.0 . .
    C C10I -0.0113(14) 0.8130(15) 1.4319(7) 0.071(4) Uani d U . . 1.0 . .
    H H10Q 0.0115 0.87 1.4386 0.086 Uiso calc U . R 1.0 . .
    H H10R 0.0319 0.7782 1.4431 0.086 Uiso calc U . R 1.0 . .
    C C11I -0.0985(15) 0.7952(16) 1.4557(8) 0.073(4) Uani d U . . 1.0 . .
    H H11Q -0.1429 0.8279 1.4438 0.088 Uiso calc U . R 1.0 . .
    H H11R -0.1198 0.7375 1.4506 0.088 Uiso calc U . R 1.0 . .
    C C12I -0.0877(15) 0.8129(16) 1.4993(8) 0.078(5) Uani d U . . 1.0 . .
    H H22F -0.0583 0.7703 1.5126 0.117 Uiso calc U . R 1.0 . .
    H H22D -0.1443 0.8159 1.5109 0.117 Uiso calc U . R 1.0 . .
    H H22E -0.053 0.865 1.5048 0.117 Uiso calc U . R 1.0 . .
    C C1J 0.5704(10) 0.8351(10) 1.0741(5) 0.028(3) Uani d U . . 1.0 . .
    H H1J1 0.621 0.8723 1.0681 0.034 Uiso calc U . R 1.0 . .
    H H1J2 0.5407 0.8612 1.0969 0.034 Uiso calc U . R 1.0 . .
    C C2J 0.6008(10) 0.7600(10) 1.0888(5) 0.029(3) Uani d U . . 1.0 . .
    H H2J1 0.6227 0.7294 1.065 0.035 Uiso calc U . R 1.0 . .
    H H2J2 0.5519 0.7262 1.0994 0.035 Uiso calc U . R 1.0 . .
    C C3J 0.6735(11) 0.7769(11) 1.1242(5) 0.035(3) Uani d U . . 1.0 . .
    H H3J1 0.6934 0.7247 1.1324 0.042 Uiso calc U . R 1.0 . .
    H H3J2 0.7228 0.809 1.113 0.042 Uiso calc U . R 1.0 . .
    C C4J 0.6470(11) 0.8215(11) 1.1628(6) 0.037(3) Uani d U . . 1.0 . .
    H H4J1 0.6984 0.8336 1.1824 0.045 Uiso calc U . R 1.0 . .
    H H4J2 0.6274 0.8738 1.1545 0.045 Uiso calc U . R 1.0 . .
    C C5J 0.5769(12) 0.7775(12) 1.1857(6) 0.042(3) Uani d U . . 1.0 . .
    H H5J1 0.5231 0.7712 1.1675 0.05 Uiso calc U . R 1.0 . .
    H H5J2 0.5933 0.7227 1.1914 0.05 Uiso calc U . R 1.0 . .
    C C6J 0.5601(12) 0.8195(12) 1.2260(6) 0.048(3) Uani d U . . 1.0 . .
    H H6J1 0.5399 0.8725 1.2196 0.057 Uiso calc U . R 1.0 . .
    H H6J2 0.6157 0.8303 1.2427 0.057 Uiso calc U . R 1.0 . .
    C C7J 0.4963(13) 0.7775(13) 1.2532(6) 0.050(3) Uani d U . . 1.0 . .
    H H7J1 0.4408 0.7679 1.2363 0.061 Uiso calc U . R 1.0 . .
    H H7J2 0.516 0.7237 1.2584 0.061 Uiso calc U . R 1.0 . .
    C C8J 0.4782(14) 0.8140(13) 1.2936(7) 0.056(3) Uani d U . . 1.0 . .
    H H8J1 0.5347 0.8287 1.309 0.067 Uiso calc U . R 1.0 . .
    H H8J2 0.4537 0.8655 1.2877 0.067 Uiso calc U . R 1.0 . .
    C C9J 0.4243(14) 0.7748(14) 1.3223(7) 0.062(3) Uani d U . . 1.0 . .
    H H9J1 0.4505 0.7245 1.329 0.074 Uiso calc U . R 1.0 . .
    H H9J2 0.3689 0.7576 1.3063 0.074 Uiso calc U . R 1.0 . .
    C C10J 0.4010(15) 0.8110(14) 1.3632(7) 0.065(3) Uani d U . . 1.0 . .
    H H10S 0.4559 0.8275 1.3797 0.078 Uiso calc U . R 1.0 . .
    H H10T 0.3747 0.8614 1.3569 0.078 Uiso calc U . R 1.0 . .
    C C11J 0.3448(15) 0.7680(15) 1.3911(7) 0.070(4) Uani d U . . 1.0 . .
    H H11S 0.373 0.7193 1.3987 0.085 Uiso calc U . R 1.0 . .
    H H11T 0.2914 0.7486 1.3741 0.085 Uiso calc U . R 1.0 . .
    C C12J 0.3176(15) 0.8042(15) 1.4304(7) 0.073(5) Uani d U . . 1.0 . .
    H H22I 0.365 0.8412 1.4436 0.11 Uiso calc U . R 1.0 . .
    H H22G 0.3022 0.7614 1.4494 0.11 Uiso calc U . R 1.0 . .
    H H22H 0.2675 0.8342 1.4244 0.11 Uiso calc U . R 1.0 . .
    C C1K 0.4410(10) 0.9107(10) 0.9379(5) 0.023(3) Uani d U . . 1.0 . .
    H H1K1 0.4977 0.8977 0.9499 0.028 Uiso calc U . R 1.0 . .
    H H1K2 0.4059 0.8592 0.9297 0.028 Uiso calc U . R 1.0 . .
    C C2K 0.4537(10) 0.9604(10) 0.8994(5) 0.025(3) Uani d U . . 1.0 . .
    H H2K1 0.4955 1.0079 0.9072 0.03 Uiso calc U . R 1.0 . .
    H H2K2 0.3981 0.9807 0.8905 0.03 Uiso calc U . R 1.0 . .
    C C3K 0.4863(10) 0.9124(10) 0.8622(5) 0.025(2) Uani d U . . 1.0 . .
    H H3K1 0.5372 0.8856 0.8721 0.03 Uiso calc U . R 1.0 . .
    H H3K2 0.4408 0.8696 0.8518 0.03 Uiso calc U . R 1.0 . .
    C C4K 0.5104(10) 0.9633(10) 0.8268(5) 0.025(2) Uani d U . . 1.0 . .
    H H4K1 0.5534 1.0081 0.8375 0.03 Uiso calc U . R 1.0 . .
    H H4K2 0.4586 0.9874 0.8156 0.03 Uiso calc U . R 1.0 . .
    C C5K 0.5479(11) 0.9155(10) 0.7912(5) 0.029(2) Uani d U . . 1.0 . .
    H H5K1 0.5969 0.888 0.8028 0.035 Uiso calc U . R 1.0 . .
    H H5K2 0.5033 0.8732 0.7792 0.035 Uiso calc U . R 1.0 . .
    C C6K 0.5787(11) 0.9685(11) 0.7562(5) 0.032(2) Uani d U . . 1.0 . .
    H H6K1 0.5291 0.9943 0.7438 0.039 Uiso calc U . R 1.0 . .
    H H6K2 0.6215 1.0121 0.7684 0.039 Uiso calc U . R 1.0 . .
    C C7K 0.6192(11) 0.9223(11) 0.7215(5) 0.033(3) Uani d U . . 1.0 . .
    H H7K1 0.669 0.8969 0.7339 0.04 Uiso calc U . R 1.0 . .
    H H7K2 0.5765 0.8783 0.7095 0.04 Uiso calc U . R 1.0 . .
    C C8K 0.6494(11) 0.9734(11) 0.6864(5) 0.035(3) Uani d U . . 1.0 . .
    H H8K1 0.6906 1.0186 0.6983 0.042 Uiso calc U . R 1.0 . .
    H H8K2 0.5993 0.9971 0.6731 0.042 Uiso calc U . R 1.0 . .
    C C9K 0.6936(11) 0.9247(11) 0.6522(5) 0.038(3) Uani d U . . 1.0 . .
    H H9K1 0.7445 0.9019 0.6652 0.046 Uiso calc U . R 1.0 . .
    H H9K2 0.6527 0.8791 0.6404 0.046 Uiso calc U . R 1.0 . .
    C C10K 0.7217(12) 0.9775(12) 0.6172(6) 0.041(3) Uani d U . . 1.0 . .
    H H10U 0.7611 1.0238 0.6294 0.049 Uiso calc U . R 1.0 . .
    H H10V 0.6703 0.9997 0.6042 0.049 Uiso calc U . R 1.0 . .
    C C11K 0.7667(12) 0.9345(12) 0.5831(6) 0.044(3) Uani d U . . 1.0 . .
    H H11U 0.728 0.8873 0.5714 0.053 Uiso calc U . R 1.0 . .
    H H11V 0.8191 0.9139 0.5958 0.053 Uiso calc U . R 1.0 . .
    C C12K 0.7922(12) 0.9872(13) 0.5474(6) 0.050(4) Uani d U . . 1.0 . .
    H H22J 0.7403 1.0031 0.5326 0.074 Uiso calc U . R 1.0 . .
    H H22K 0.825 0.9568 0.5279 0.074 Uiso calc U . R 1.0 . .
    H H22L 0.828 1.0357 0.5588 0.074 Uiso calc U . R 1.0 . .
    C C1L 0.2669(11) 1.0559(11) 1.0536(5) 0.034(3) Uani d U . . 1.0 . .
    H H1L1 0.3209 1.0775 1.0416 0.041 Uiso calc U . R 1.0 . .
    H H1L2 0.2191 1.0845 1.0415 0.041 Uiso calc U . R 1.0 . .
    C C2L 0.2744(11) 1.0712(11) 1.1017(5) 0.036(3) Uani d U . . 1.0 . .
    H H2L1 0.3195 1.0389 1.1134 0.044 Uiso calc U . R 1.0 . .
    H H2L2 0.2942 1.1289 1.1082 0.044 Uiso calc U . R 1.0 . .
    C C3L 0.1945(11) 1.0515(11) 1.1233(5) 0.037(3) Uani d U . . 1.0 . .
    H H3L1 0.171 0.9954 1.1147 0.045 Uiso calc U . R 1.0 . .
    H H3L2 0.1512 1.0881 1.1143 0.045 Uiso calc U . R 1.0 . .
    C C4L 0.2075(11) 1.0590(12) 1.1707(6) 0.039(3) Uani d U . . 1.0 . .
    H H4L1 0.2363 1.1133 1.1792 0.047 Uiso calc U . R 1.0 . .
    H H4L2 0.2464 1.0185 1.18 0.047 Uiso calc U . R 1.0 . .
    C C5L 0.1240(11) 1.0467(12) 1.1933(6) 0.041(3) Uani d U . . 1.0 . .
    H H5L1 0.085 1.0867 1.1836 0.049 Uiso calc U . R 1.0 . .
    H H5L2 0.0956 0.9922 1.1849 0.049 Uiso calc U . R 1.0 . .
    C C6L 0.1341(11) 1.0545(12) 1.2407(6) 0.041(3) Uani d U . . 1.0 . .
    H H6L1 0.1738 1.0151 1.2504 0.049 Uiso calc U . R 1.0 . .
    H H6L2 0.1617 1.1093 1.2491 0.049 Uiso calc U . R 1.0 . .
    C C7L 0.0519(11) 1.0412(12) 1.2634(6) 0.042(3) Uani d U . . 1.0 . .
    H H7L1 0.0119 1.0801 1.2533 0.051 Uiso calc U . R 1.0 . .
    H H7L2 0.0247 0.9862 1.255 0.051 Uiso calc U . R 1.0 . .
    C C8L 0.0597(12) 1.0495(12) 1.3100(6) 0.043(3) Uani d U . . 1.0 . .
    H H8L1 0.0863 1.1047 1.3185 0.052 Uiso calc U . R 1.0 . .
    H H8L2 0.0997 1.0108 1.3203 0.052 Uiso calc U . R 1.0 . .
    C C9L -0.0225(12) 1.0356(12) 1.3316(6) 0.045(3) Uani d U . . 1.0 . .
    H H9L1 -0.0493 0.9808 1.3225 0.055 Uiso calc U . R 1.0 . .
    H H9L2 -0.062 1.0747 1.3213 0.055 Uiso calc U . R 1.0 . .
    C C10L -0.0179(12) 1.0424(13) 1.3788(6) 0.049(3) Uani d U . . 1.0 . .
    H H10W 0.0221 1.0039 1.3893 0.059 Uiso calc U . R 1.0 . .
    H H10$ 0.0075 1.0976 1.388 0.059 Uiso calc U . R 1.0 . .
    C C11L -0.0997(13) 1.0269(13) 1.3986(6) 0.052(3) Uani d U . . 1.0 . .
    H H11W -0.1238 0.971 1.39 0.063 Uiso calc U . R 1.0 . .
    H H11$ -0.1402 1.0639 1.3871 0.063 Uiso calc U . R 1.0 . .
    C C12L -0.0979(14) 1.0361(14) 1.4461(6) 0.062(5) Uani d U . . 1.0 . .
    H H22O -0.0577 1.0005 1.4583 0.093 Uiso calc U . R 1.0 . .
    H H22M -0.1558 1.0216 1.4554 0.093 Uiso calc U . R 1.0 . .
    H H22N -0.0791 1.0924 1.4552 0.093 Uiso calc U . R 1.0 . .
    Sb Sb1 0.76329(9) 0.70723(9) 0.98495(5) 0.0474(4) Uani d . . . 1.0 . .
    F F1A 0.8293(13) 0.6796(9) 1.0301(5) 0.085(7) Uani d U P D 0.736(13) A 1
    F F2A 0.7281(12) 0.7946(11) 1.0189(5) 0.090(7) Uani d U P D 0.736(13) A 1
    F F3A 0.6976(11) 0.7424(10) 0.9408(6) 0.089(7) Uani d U P D 0.736(13) A 1
    F F4A 0.7968(10) 0.6262(9) 0.9514(5) 0.068(6) Uani d U P D 0.736(13) A 1
    F F1B 0.861(3) 0.646(3) 0.9882(16) 0.084(12) Uani d U P D 0.264(13) A 2
    F F2B 0.787(3) 0.739(3) 1.0390(15) 0.079(12) Uani d U P D 0.264(13) A 2
    F F3B 0.678(3) 0.758(3) 0.9773(14) 0.068(12) Uani d U P D 0.264(13) A 2
    F F4B 0.752(3) 0.665(3) 0.9267(16) 0.090(13) Uani d U P D 0.264(13) A 2
    F F5 0.8549(7) 0.7809(7) 0.9723(3) 0.051(3) Uani d U . . 1.0 . .
    F F6 0.6745(9) 0.6324(9) 0.9990(4) 0.099(5) Uani d U . . 1.0 . .

loop_
    _atom_site_aniso_label
    _atom_site_aniso_U_11
    _atom_site_aniso_U_22
    _atom_site_aniso_U_33
    _atom_site_aniso_U_12
    _atom_site_aniso_U_13
    _atom_site_aniso_U_23
    Pt1 0.0259(4) 0.0137(4) 0.0282(4) 0.0010(3) 0.0007(3) 0.0038(3)
    Pt2 0.0204(3) 0.0143(4) 0.0226(4) 0.0012(3) 0.0011(3) 0.0040(3)
    Pt3 0.0180(3) 0.0133(4) 0.0175(4) 0.0004(3) 0.0005(3) 0.0028(3)
    Pt4 0.0191(3) 0.0135(4) 0.0169(4) 0.0007(3) 0.0014(3) 0.0024(3)
    Pt5 0.0230(4) 0.0142(4) 0.0159(4) 0.0014(3) 0.0008(3) 0.0030(3)
    Pt6 0.0284(4) 0.0117(4) 0.0223(4) 0.0002(3) 0.0018(3) 0.0039(3)
    S1 0.022(2) 0.021(3) 0.038(3) 0.0048(19) 0.001(2) -0.005(2)
    S2 0.025(2) 0.014(2) 0.029(3) 0.0004(18) -0.0010(19) 0.0067(18)
    S3 0.023(2) 0.019(2) 0.019(2) 0.0032(18) 0.0035(18) 0.0057(17)
    S4 0.023(2) 0.021(2) 0.023(2) 0.0040(18) 0.0021(19) 0.0078(18)
    S5 0.022(2) 0.016(2) 0.017(2) 0.0011(17) 0.0022(18) 0.0062(17)
    S6 0.022(2) 0.020(2) 0.012(2) 0.0010(18) 0.0036(17) 0.0003(17)
    S7 0.018(2) 0.014(2) 0.020(2) 0.0040(17) 0.0036(17) 0.0017(17)
    S8 0.023(2) 0.017(2) 0.015(2) -0.0003(17) 0.0040(18) 0.0022(17)
    S9 0.047(3) 0.019(2) 0.019(2) 0.003(2) 0.005(2) 0.0016(18)
    S10 0.025(2) 0.015(2) 0.025(2) -0.0007(18) -0.0025(19) 0.0039(18)
    S11 0.027(2) 0.015(2) 0.026(3) -0.0005(18) 0.000(2) 0.0065(18)
    S12 0.034(3) 0.012(2) 0.034(3) 0.0004(19) 0.002(2) -0.0008(19)
    Ag1 0.0187(6) 0.0171(6) 0.0196(6) 0.0042(5) 0.0022(5) 0.0045(5)
    C1A 0.081(6) 0.080(6) 0.080(6) 0.008(4) 0.008(4) 0.001(4)
    C2A 0.087(5) 0.087(5) 0.086(5) 0.009(3) 0.007(3) 0.002(3)
    C3A 0.095(5) 0.095(5) 0.096(5) 0.008(3) 0.006(3) 0.002(3)
    C4A 0.096(5) 0.096(5) 0.099(5) 0.007(3) 0.004(3) 0.007(3)
    C5A 0.092(5) 0.091(5) 0.094(5) 0.006(3) 0.002(3) 0.011(3)
    C6A 0.087(5) 0.086(5) 0.091(5) 0.008(3) -0.002(3) 0.009(3)
    C7A 0.082(4) 0.081(4) 0.085(4) 0.008(3) -0.003(3) 0.007(3)
    C8A 0.079(4) 0.078(4) 0.082(4) 0.009(3) -0.004(3) 0.007(3)
    C9A 0.079(4) 0.078(5) 0.081(5) 0.009(3) -0.004(3) 0.006(3)
    C10A 0.080(5) 0.080(5) 0.081(5) 0.008(3) -0.003(3) 0.007(3)
    C11A 0.081(5) 0.082(5) 0.084(5) 0.007(4) -0.003(4) 0.005(4)
    C12A 0.084(8) 0.082(8) 0.089(8) 0.004(7) -0.008(7) 0.012(7)
    C1B 0.036(4) 0.032(4) 0.034(4) 0.001(4) 0.000(4) 0.006(4)
    C2B 0.037(4) 0.034(4) 0.036(4) 0.002(3) 0.000(3) 0.007(3)
    C3B 0.039(4) 0.036(4) 0.037(4) 0.002(3) 0.000(3) 0.006(3)
    C4B 0.041(4) 0.037(4) 0.039(4) 0.001(3) 0.000(3) 0.005(3)
    C5B 0.041(4) 0.038(4) 0.041(4) 0.003(3) -0.001(3) 0.004(3)
    C6B 0.043(4) 0.040(4) 0.042(4) 0.005(3) 0.000(3) 0.004(3)
    C7B 0.043(4) 0.041(4) 0.042(4) 0.006(3) 0.000(3) 0.005(3)
    C8B 0.046(4) 0.045(4) 0.044(4) 0.005(3) 0.000(3) 0.004(3)
    C9B 0.048(4) 0.048(4) 0.046(4) 0.006(3) 0.000(3) 0.004(3)
    C10B 0.053(4) 0.051(4) 0.050(4) 0.006(3) 0.001(3) 0.005(3)
    C11B 0.056(5) 0.055(5) 0.053(5) 0.007(4) 0.001(4) 0.003(4)
    C12B 0.068(7) 0.062(7) 0.059(7) 0.011(6) 0.008(6) 0.003(6)
    C1C 0.029(4) 0.028(4) 0.030(4) 0.003(4) 0.003(4) 0.003(4)
    C2C 0.032(4) 0.031(4) 0.032(4) 0.002(3) 0.002(3) 0.002(3)
    C3C 0.031(4) 0.031(4) 0.032(4) 0.003(3) 0.002(3) 0.003(3)
    C4C 0.034(4) 0.034(4) 0.034(4) 0.003(3) 0.001(3) 0.000(3)
    C5C 0.035(4) 0.036(4) 0.036(4) 0.003(3) 0.001(3) 0.000(3)
    C6C 0.037(4) 0.039(4) 0.036(4) 0.003(3) 0.001(3) 0.001(3)
    C7C 0.038(4) 0.039(4) 0.036(4) 0.005(3) 0.000(3) 0.002(3)
    C8C 0.040(4) 0.041(4) 0.038(4) 0.005(3) 0.002(3) 0.002(3)
    C9C 0.043(4) 0.044(4) 0.041(4) 0.005(3) 0.002(3) 0.002(3)
    C10C 0.046(4) 0.046(4) 0.045(4) 0.004(3) 0.003(3) 0.003(3)
    C11C 0.049(4) 0.049(4) 0.048(4) 0.003(4) 0.004(4) 0.003(4)
    C12C 0.058(7) 0.059(7) 0.053(7) 0.001(6) 0.011(6) 0.005(6)
    C1D 0.021(4) 0.022(4) 0.020(4) 0.001(3) 0.001(3) 0.004(3)
    C2D 0.023(4) 0.026(4) 0.025(4) 0.004(3) 0.000(3) 0.004(3)
    C3D 0.026(4) 0.028(4) 0.027(4) 0.005(3) 0.000(3) 0.004(3)
    C4D 0.028(4) 0.028(4) 0.028(4) 0.002(3) 0.000(3) 0.003(3)
    C5D 0.030(4) 0.029(4) 0.030(4) 0.001(3) 0.000(3) 0.002(3)
    C6D 0.031(4) 0.028(4) 0.030(4) 0.002(3) 0.000(3) 0.002(3)
    C7D 0.034(4) 0.033(4) 0.033(4) 0.001(3) 0.000(3) 0.001(3)
    C8D 0.036(4) 0.036(4) 0.036(4) 0.003(3) 0.002(3) 0.001(3)
    C9D 0.039(4) 0.040(4) 0.040(4) 0.002(3) 0.003(3) 0.002(3)
    C10D 0.042(4) 0.044(4) 0.044(4) 0.003(3) 0.005(3) 0.002(3)
    C11D 0.044(4) 0.047(4) 0.046(4) 0.003(4) 0.005(4) 0.001(4)
    C12D 0.049(7) 0.053(7) 0.049(7) 0.000(6) 0.007(6) -0.002(6)
    C1E 0.020(4) 0.022(4) 0.025(4) 0.002(3) 0.000(3) 0.002(3)
    C2E 0.020(4) 0.021(4) 0.023(4) 0.000(3) 0.000(3) 0.004(3)
    C3E 0.021(3) 0.019(4) 0.021(4) 0.000(3) 0.000(3) 0.003(3)
    C4E 0.021(3) 0.021(4) 0.022(4) -0.003(3) 0.002(3) 0.003(3)
    C5E 0.021(3) 0.021(4) 0.020(3) -0.002(3) 0.003(3) 0.005(3)
    C6E 0.020(3) 0.020(3) 0.019(3) -0.001(3) 0.003(3) 0.002(3)
    C7E 0.022(3) 0.020(4) 0.020(3) 0.000(3) 0.002(3) 0.002(3)
    C8E 0.025(4) 0.022(4) 0.024(4) -0.001(3) 0.002(3) 0.002(3)
    C9E 0.030(4) 0.026(4) 0.027(4) 0.001(3) 0.004(3) 0.002(3)
    C10E 0.035(4) 0.031(4) 0.032(4) 0.003(3) 0.005(3) 0.003(3)
    C11E 0.039(4) 0.037(4) 0.035(4) 0.001(3) 0.005(3) 0.002(3)
    C12E 0.048(7) 0.049(7) 0.041(7) 0.002(6) 0.008(6) 0.005(6)
    C1F 0.018(4) 0.017(4) 0.017(4) 0.001(3) 0.004(3) -0.002(3)
    C2F 0.020(4) 0.017(4) 0.019(4) 0.002(3) 0.003(3) -0.002(3)
    C3F 0.023(3) 0.021(4) 0.021(3) 0.004(3) 0.003(3) -0.001(3)
    C4F 0.027(4) 0.025(4) 0.024(4) 0.002(3) 0.003(3) -0.002(3)
    C5F 0.030(4) 0.030(4) 0.028(4) 0.002(3) 0.002(3) -0.001(3)
    C6F 0.036(4) 0.035(4) 0.032(4) 0.003(3) 0.002(3) 0.000(3)
    C7F 0.039(4) 0.039(4) 0.035(4) 0.002(3) 0.003(3) 0.000(3)
    C8F 0.040(4) 0.041(4) 0.038(4) 0.002(3) 0.002(3) 0.001(3)
    C9F 0.041(4) 0.043(4) 0.039(4) 0.003(3) 0.003(3) 0.002(3)
    C10F 0.041(4) 0.045(4) 0.041(4) 0.003(3) 0.004(3) 0.001(3)
    C11F 0.041(4) 0.046(4) 0.042(4) 0.002(4) 0.005(4) 0.002(4)
    C12F 0.045(7) 0.053(7) 0.048(7) -0.004(6) 0.010(6) 0.001(6)
    C1G 0.022(4) 0.019(4) 0.021(4) -0.001(3) 0.000(3) 0.004(3)
    C2G 0.022(4) 0.021(4) 0.022(4) -0.001(3) 0.002(3) 0.000(3)
    C3G 0.023(4) 0.021(4) 0.022(4) 0.000(3) 0.003(3) 0.002(3)
    C4G 0.025(4) 0.024(4) 0.025(4) 0.001(3) 0.004(3) 0.001(3)
    C5G 0.026(4) 0.027(4) 0.027(4) 0.002(3) 0.004(3) 0.001(3)
    C6G 0.026(4) 0.028(4) 0.028(4) 0.003(3) 0.004(3) 0.003(3)
    C7G 0.028(4) 0.027(4) 0.028(4) 0.003(3) 0.003(3) 0.003(3)
    C8G 0.029(4) 0.029(4) 0.029(4) 0.003(3) 0.003(3) 0.002(3)
    C9G 0.032(4) 0.032(4) 0.031(4) 0.002(3) 0.004(3) 0.001(3)
    C10G 0.034(4) 0.035(4) 0.033(4) 0.004(3) 0.004(3) 0.002(3)
    C11G 0.037(4) 0.040(4) 0.035(4) 0.004(3) 0.004(3) 0.001(3)
    C12G 0.048(7) 0.047(7) 0.042(7) 0.005(6) 0.013(6) 0.004(6)
    C1H 0.023(4) 0.022(4) 0.026(4) 0.002(3) 0.004(4) 0.006(3)
    C2H 0.025(4) 0.025(4) 0.026(4) 0.001(3) 0.003(3) 0.006(3)
    C3H 0.027(4) 0.027(4) 0.027(4) 0.000(3) 0.003(3) 0.003(3)
    C4H 0.028(4) 0.029(4) 0.029(4) 0.001(3) 0.002(3) 0.003(3)
    C5H 0.029(4) 0.031(4) 0.031(4) 0.001(3) 0.001(3) 0.002(3)
    C6H 0.032(4) 0.031(4) 0.031(4) 0.000(3) 0.001(3) 0.004(3)
    C7H 0.033(4) 0.032(4) 0.030(4) 0.001(3) 0.002(3) 0.004(3)
    C8H 0.034(4) 0.034(4) 0.031(4) 0.001(3) 0.001(3) 0.003(3)
    C9H 0.035(4) 0.037(4) 0.034(4) 0.003(3) 0.002(3) 0.002(3)
    C10H 0.037(4) 0.040(4) 0.035(4) 0.004(3) 0.003(3) 0.002(3)
    C11H 0.041(4) 0.043(4) 0.038(4) 0.003(4) 0.005(4) 0.001(4)
    C12H 0.046(7) 0.045(7) 0.038(7) 0.006(6) 0.008(6) -0.004(6)
    C1I 0.055(5) 0.051(5) 0.053(5) 0.006(4) 0.007(4) 0.007(4)
    C2I 0.059(4) 0.057(4) 0.058(4) 0.005(3) 0.005(3) 0.008(3)
    C3I 0.063(4) 0.060(4) 0.061(4) 0.005(3) 0.002(3) 0.004(3)
    C4I 0.067(4) 0.061(4) 0.062(4) 0.009(3) 0.000(3) 0.003(3)
    C5I 0.068(4) 0.063(4) 0.064(4) 0.008(3) -0.002(3) 0.003(3)
    C6I 0.068(4) 0.062(4) 0.065(4) 0.008(3) -0.002(3) 0.005(3)
    C7I 0.066(4) 0.063(4) 0.067(4) 0.007(3) -0.001(3) 0.005(3)
    C8I 0.067(4) 0.064(4) 0.069(4) 0.006(3) 0.000(3) 0.005(3)
    C9I 0.070(4) 0.067(4) 0.073(4) 0.007(3) 0.002(3) 0.004(3)
    C10I 0.070(4) 0.069(5) 0.075(5) 0.006(3) 0.003(3) 0.004(3)
    C11I 0.070(5) 0.072(5) 0.078(5) 0.006(4) 0.004(4) 0.004(4)
    C12I 0.072(8) 0.077(8) 0.086(8) 0.010(7) 0.006(7) 0.009(7)
    C1J 0.029(4) 0.030(4) 0.026(4) 0.005(4) 0.003(4) 0.002(4)
    C2J 0.030(4) 0.030(4) 0.029(4) 0.007(3) 0.003(3) 0.002(3)
    C3J 0.035(4) 0.035(4) 0.035(4) 0.005(3) 0.000(3) 0.001(3)
    C4J 0.038(4) 0.037(4) 0.036(4) 0.004(3) -0.001(3) 0.001(3)
    C5J 0.044(4) 0.040(4) 0.041(4) 0.004(3) 0.000(3) 0.003(3)
    C6J 0.048(4) 0.047(4) 0.048(4) 0.004(3) 0.001(3) 0.002(3)
    C7J 0.052(4) 0.049(4) 0.050(4) 0.004(3) 0.003(3) 0.002(3)
    C8J 0.058(4) 0.055(4) 0.054(4) 0.003(3) 0.005(3) 0.002(3)
    C9J 0.064(4) 0.060(4) 0.060(4) 0.001(3) 0.006(3) 0.003(3)
    C10J 0.067(4) 0.066(4) 0.063(4) 0.002(3) 0.007(3) 0.003(3)
    C11J 0.072(5) 0.071(5) 0.068(5) 0.002(4) 0.008(4) 0.004(4)
    C12J 0.074(8) 0.074(8) 0.070(8) 0.000(7) 0.012(7) 0.004(7)
    C1K 0.025(4) 0.023(4) 0.023(4) 0.002(3) 0.002(4) 0.004(3)
    C2K 0.025(4) 0.023(4) 0.025(4) -0.001(3) 0.000(3) 0.003(3)
    C3K 0.024(4) 0.024(4) 0.026(4) 0.000(3) 0.000(3) 0.005(3)
    C4K 0.026(4) 0.025(4) 0.024(4) 0.001(3) 0.001(3) 0.004(3)
    C5K 0.031(4) 0.030(4) 0.027(4) 0.002(3) 0.001(3) 0.004(3)
    C6K 0.032(4) 0.034(4) 0.030(4) 0.002(3) 0.002(3) 0.001(3)
    C7K 0.033(4) 0.035(4) 0.031(4) 0.001(3) 0.003(3) 0.002(3)
    C8K 0.034(4) 0.037(4) 0.033(4) 0.002(3) 0.002(3) 0.002(3)
    C9K 0.038(4) 0.040(4) 0.036(4) 0.001(3) 0.001(3) 0.003(3)
    C10K 0.040(4) 0.043(4) 0.039(4) 0.003(3) 0.001(3) 0.005(3)
    C11K 0.045(4) 0.046(4) 0.041(4) 0.003(4) 0.002(4) 0.004(4)
    C12K 0.051(7) 0.052(7) 0.046(7) 0.000(6) 0.006(6) 0.010(6)
    C1L 0.035(4) 0.031(4) 0.038(4) 0.005(4) 0.000(4) 0.001(4)
    C2L 0.038(4) 0.033(4) 0.039(4) 0.005(3) 0.000(3) -0.001(3)
    C3L 0.038(4) 0.035(4) 0.039(4) 0.005(3) 0.001(3) 0.001(3)
    C4L 0.039(4) 0.038(4) 0.040(4) 0.006(3) 0.001(3) 0.000(3)
    C5L 0.041(4) 0.040(4) 0.042(4) 0.007(3) 0.000(3) 0.000(3)
    C6L 0.041(4) 0.039(4) 0.042(4) 0.006(3) 0.000(3) 0.000(3)
    C7L 0.042(4) 0.041(4) 0.043(4) 0.005(3) 0.001(3) 0.001(3)
    C8L 0.043(4) 0.042(4) 0.044(4) 0.006(3) 0.001(3) 0.001(3)
    C9L 0.046(4) 0.044(4) 0.046(4) 0.004(3) 0.000(3) 0.002(3)
    C10L 0.050(4) 0.047(4) 0.049(4) 0.006(3) -0.001(3) 0.002(3)
    C11L 0.055(5) 0.051(5) 0.051(5) 0.006(4) 0.000(4) 0.002(4)
    C12L 0.067(7) 0.060(7) 0.057(7) 0.007(6) -0.002(6) 0.004(6)
    Sb1 0.0489(9) 0.0436(10) 0.0502(10) -0.0017(7) 0.0106(7) 0.0099(7)
    F1A 0.150(15) 0.029(10) 0.064(12) -0.025(10) -0.056(11) 0.032(9)
    F2A 0.109(14) 0.058(12) 0.105(14) -0.011(10) 0.080(12) -0.007(10)
    F3A 0.083(12) 0.071(13) 0.105(15) -0.021(10) -0.051(12) 0.050(12)
    F4A 0.081(12) 0.042(10) 0.081(13) -0.014(9) 0.063(10) -0.023(9)
    F1B 0.09(2) 0.05(2) 0.11(2) 0.020(18) 0.01(2) 0.027(19)
    F2B 0.08(2) 0.09(2) 0.07(2) -0.018(19) 0.010(19) 0.00(2)
    F3B 0.06(2) 0.05(2) 0.10(2) 0.019(17) 0.00(2) 0.03(2)
    F4B 0.09(2) 0.08(2) 0.09(2) -0.034(19) 0.02(2) -0.01(2)
    F5 0.048(7) 0.039(7) 0.064(8) -0.011(5) 0.018(6) 0.001(6)
    F6 0.094(10) 0.107(13) 0.086(11) -0.066(9) 0.033(9) 0.005(9)

_geom_special_details                   
;
All esds (except the esd in the dihedral angle between two l.s. planes)
are estimated using the full covariance matrix.  The cell esds are taken
into account individually in the estimation of esds in distances, angles
and torsion angles; correlations between esds in cell parameters are only
used when they are defined by crystal symmetry.  An approximate (isotropic)
treatment of cell esds is used for estimating esds involving l.s. planes.
;

loop_
    _geom_bond_atom_site_label_1
    _geom_bond_atom_site_label_2
    _geom_bond_site_symmetry_2
    _geom_bond_distance
    _geom_bond_publ_flag
    Pt1 S1 . 2.305(4) ?
    Pt1 S12 . 2.305(5) ?
    Pt1 S2 . 2.312(4) ?
    Pt1 S11 . 2.325(4) ?
    Pt1 Ag1 . 3.0431(14) ?
    Pt1 Pt6 . 3.1034(9) ?
    Pt1 Pt2 . 3.1449(10) ?
    Pt2 S2 . 2.323(4) ?
    Pt2 S1 . 2.324(4) ?
    Pt2 S3 . 2.326(4) ?
    Pt2 S4 . 2.331(4) ?
    Pt2 Pt3 . 3.0139(9) ?
    Pt2 Ag1 . 3.0200(13) ?
    Pt3 S6 . 2.322(4) ?
    Pt3 S5 . 2.323(4) ?
    Pt3 S3 . 2.323(4) ?
    Pt3 S4 . 2.345(4) ?
    Pt3 Pt4 . 3.0802(8) ?
    Pt3 Ag1 . 3.1641(15) ?
    Pt4 S8 . 2.311(4) ?
    Pt4 S7 . 2.314(4) ?
    Pt4 S6 . 2.317(4) ?
    Pt4 S5 . 2.320(4) ?
    Pt4 Ag1 . 2.9857(14) ?
    Pt4 Pt5 . 3.1400(9) ?
    Pt5 S8 . 2.312(4) ?
    Pt5 S7 . 2.318(4) ?
    Pt5 S10 . 2.329(4) ?
    Pt5 S9 . 2.331(4) ?
    Pt5 Pt6 . 3.0083(9) ?
    Pt5 Ag1 . 3.0125(13) ?
    Pt6 S11 . 2.304(4) ?
    Pt6 S12 . 2.318(4) ?
    Pt6 S9 . 2.320(4) ?
    Pt6 S10 . 2.332(4) ?
    Pt6 Ag1 . 3.2576(15) ?
    S1 C1A . 1.80(2) ?
    S2 C1B . 1.844(16) ?
    S3 C1C . 1.842(16) ?
    S4 C1D . 1.834(15) ?
    S5 C1E . 1.847(16) ?
    S6 C1F . 1.842(15) ?
    S7 C1G . 1.830(15) ?
    S8 C1H . 1.812(15) ?
    S9 C1I . 1.84(2) ?
    S10 C1J . 1.829(16) ?
    S11 C1K . 1.834(16) ?
    S12 C1L . 1.806(18) ?
    C1A C2A . 1.47(3) ?
    C1A H1A1 . 0.99 ?
    C1A H1A2 . 0.99 ?
    C2A C3A . 1.568(13) ?
    C2A H2A1 . 0.99 ?
    C2A H2A2 . 0.99 ?
    C3A C4A . 1.471(13) ?
    C3A H3A1 . 0.99 ?
    C3A H3A2 . 0.99 ?
    C4A C5A . 1.537(13) ?
    C4A H4A1 . 0.99 ?
    C4A H4A2 . 0.99 ?
    C5A C6A . 1.534(14) ?
    C5A H5A1 . 0.99 ?
    C5A H5A2 . 0.99 ?
    C6A C7A . 1.493(13) ?
    C6A H6A1 . 0.99 ?
    C6A H6A2 . 0.99 ?
    C7A C8A . 1.43(3) ?
    C7A H7A1 . 0.99 ?
    C7A H7A2 . 0.99 ?
    C8A C9A . 1.44(3) ?
    C8A H8A1 . 0.99 ?
    C8A H8A2 . 0.99 ?
    C9A C10A . 1.44(3) ?
    C9A H9A1 . 0.99 ?
    C9A H9A2 . 0.99 ?
    C10A C11A . 1.40(3) ?
    C10A H10A . 0.99 ?
    C10A H10B . 0.99 ?
    C11A C12A . 1.51(3) ?
    C11A H11A . 0.99 ?
    C11A H11B . 0.99 ?
    C12A H12A . 0.98 ?
    C12A H12B . 0.98 ?
    C12A H12C . 0.98 ?
    C1B C2B . 1.51(2) ?
    C1B H1B1 . 0.99 ?
    C1B H1B2 . 0.99 ?
    C2B C3B . 1.53(2) ?
    C2B H2B1 . 0.99 ?
    C2B H2B2 . 0.99 ?
    C3B C4B . 1.49(2) ?
    C3B H3B1 . 0.99 ?
    C3B H3B2 . 0.99 ?
    C4B C5B . 1.53(2) ?
    C4B H4B1 . 0.99 ?
    C4B H4B2 . 0.99 ?
    C5B C6B . 1.50(2) ?
    C5B H5B1 . 0.99 ?
    C5B H5B2 . 0.99 ?
    C6B C7B . 1.56(2) ?
    C6B H6B1 . 0.99 ?
    C6B H6B2 . 0.99 ?
    C7B C8B . 1.53(2) ?
    C7B H7B1 . 0.99 ?
    C7B H7B2 . 0.99 ?
    C8B C9B . 1.49(2) ?
    C8B H8B1 . 0.99 ?
    C8B H8B2 . 0.99 ?
    C9B C10B . 1.52(3) ?
    C9B H9B1 . 0.99 ?
    C9B H9B2 . 0.99 ?
    C10B C11B . 1.51(3) ?
    C10B H10C . 0.99 ?
    C10B H10D . 0.99 ?
    C11B C12B . 1.52(3) ?
    C11B H11C . 0.99 ?
    C11B H11D . 0.99 ?
    C12B H12D . 0.98 ?
    C12B H12E . 0.98 ?
    C12B H12F . 0.98 ?
    C1C C2C . 1.52(2) ?
    C1C H1C1 . 0.99 ?
    C1C H1C2 . 0.99 ?
    C2C C3C . 1.53(2) ?
    C2C H2C1 . 0.99 ?
    C2C H2C2 . 0.99 ?
    C3C C4C . 1.48(2) ?
    C3C H3C1 . 0.99 ?
    C3C H3C2 . 0.99 ?
    C4C C5C . 1.54(2) ?
    C4C H4C1 . 0.99 ?
    C4C H4C2 . 0.99 ?
    C5C C6C . 1.48(2) ?
    C5C H5C1 . 0.99 ?
    C5C H5C2 . 0.99 ?
    C6C C7C . 1.52(2) ?
    C6C H6C1 . 0.99 ?
    C6C H6C2 . 0.99 ?
    C7C C8C . 1.54(2) ?
    C7C H7C1 . 0.99 ?
    C7C H7C2 . 0.99 ?
    C8C C9C . 1.52(2) ?
    C8C H8C1 . 0.99 ?
    C8C H8C2 . 0.99 ?
    C9C C10C . 1.56(2) ?
    C9C H9C1 . 0.99 ?
    C9C H9C2 . 0.99 ?
    C10C C11C . 1.51(2) ?
    C10C H10E . 0.99 ?
    C10C H10F . 0.99 ?
    C11C C12C . 1.53(3) ?
    C11C H11E . 0.99 ?
    C11C H11F . 0.99 ?
    C12C H12G . 0.98 ?
    C12C H12H . 0.98 ?
    C12C H12I . 0.98 ?
    C1D C2D . 1.47(2) ?
    C1D H1D1 . 0.99 ?
    C1D H1D2 . 0.99 ?
    C2D C3D . 1.54(2) ?
    C2D H2D1 . 0.99 ?
    C2D H2D2 . 0.99 ?
    C3D C4D . 1.54(2) ?
    C3D H3D1 . 0.99 ?
    C3D H3D2 . 0.99 ?
    C4D C5D . 1.52(2) ?
    C4D H4D1 . 0.99 ?
    C4D H4D2 . 0.99 ?
    C5D C6D . 1.49(2) ?
    C5D H5D1 . 0.99 ?
    C5D H5D2 . 0.99 ?
    C6D C7D . 1.52(2) ?
    C6D H6D1 . 0.99 ?
    C6D H6D2 . 0.99 ?
    C7D C8D . 1.51(2) ?
    C7D H7D1 . 0.99 ?
    C7D H7D2 . 0.99 ?
    C8D C9D . 1.54(2) ?
    C8D H8D1 . 0.99 ?
    C8D H8D2 . 0.99 ?
    C9D C10D . 1.51(2) ?
    C9D H9D1 . 0.99 ?
    C9D H9D2 . 0.99 ?
    C10D C11D . 1.57(2) ?
    C10D H10G . 0.99 ?
    C10D H10H . 0.99 ?
    C11D C12D . 1.46(2) ?
    C11D H11G . 0.99 ?
    C11D H11H . 0.99 ?
    C12D H12J . 0.98 ?
    C12D H12K . 0.98 ?
    C12D H12L . 0.98 ?
    C1E C2E . 1.50(2) ?
    C1E H1E1 . 0.99 ?
    C1E H1E2 . 0.99 ?
    C2E C3E . 1.52(2) ?
    C2E H2E1 . 0.99 ?
    C2E H2E2 . 0.99 ?
    C3E C4E . 1.535(19) ?
    C3E H3E1 . 0.99 ?
    C3E H3E2 . 0.99 ?
    C4E C5E . 1.51(2) ?
    C4E H4E1 . 0.99 ?
    C4E H4E2 . 0.99 ?
    C5E C6E . 1.575(19) ?
    C5E H5E1 . 0.99 ?
    C5E H5E2 . 0.99 ?
    C6E C7E . 1.50(2) ?
    C6E H6E1 . 0.99 ?
    C6E H6E2 . 0.99 ?
    C7E C8E . 1.53(2) ?
    C7E H7E1 . 0.99 ?
    C7E H7E2 . 0.99 ?
    C8E C9E . 1.48(2) ?
    C8E H8E1 . 0.99 ?
    C8E H8E2 . 0.99 ?
    C9E C10E . 1.51(2) ?
    C9E H9E1 . 0.99 ?
    C9E H9E2 . 0.99 ?
    C10E C11E . 1.52(2) ?
    C10E H10I . 0.99 ?
    C10E H10J . 0.99 ?
    C11E C12E . 1.54(2) ?
    C11E H11I . 0.99 ?
    C11E H11J . 0.99 ?
    C12E H12M . 0.98 ?
    C12E H12N . 0.98 ?
    C12E H12O . 0.98 ?
    C1F C2F . 1.553(19) ?
    C1F H1F1 . 0.99 ?
    C1F H1F2 . 0.99 ?
    C2F C3F . 1.545(19) ?
    C2F H2F1 . 0.99 ?
    C2F H2F2 . 0.99 ?
    C3F C4F . 1.48(2) ?
    C3F H3F1 . 0.99 ?
    C3F H3F2 . 0.99 ?
    C4F C5F . 1.56(2) ?
    C4F H4F1 . 0.99 ?
    C4F H4F2 . 0.99 ?
    C5F C6F . 1.51(2) ?
    C5F H5F1 . 0.99 ?
    C5F H5F2 . 0.99 ?
    C6F C7F . 1.53(2) ?
    C6F H6F1 . 0.99 ?
    C6F H6F2 . 0.99 ?
    C7F C8F . 1.54(2) ?
    C7F H7F1 . 0.99 ?
    C7F H7F2 . 0.99 ?
    C8F C9F . 1.52(2) ?
    C8F H8F1 . 0.99 ?
    C8F H8F2 . 0.99 ?
    C9F C10F . 1.55(2) ?
    C9F H9F1 . 0.99 ?
    C9F H9F2 . 0.99 ?
    C10F C11F . 1.53(2) ?
    C10F H10K . 0.99 ?
    C10F H10L . 0.99 ?
    C11F C12F . 1.51(2) ?
    C11F H11K . 0.99 ?
    C11F H11L . 0.99 ?
    C12F H12P . 0.98 ?
    C12F H12Q . 0.98 ?
    C12F H12R . 0.98 ?
    C1G C2G . 1.53(2) ?
    C1G H1G1 . 0.99 ?
    C1G H1G2 . 0.99 ?
    C2G C3G . 1.50(2) ?
    C2G H2G1 . 0.99 ?
    C2G H2G2 . 0.99 ?
    C3G C4G . 1.53(2) ?
    C3G H3G1 . 0.99 ?
    C3G H3G2 . 0.99 ?
    C4G C5G . 1.54(2) ?
    C4G H4G1 . 0.99 ?
    C4G H4G2 . 0.99 ?
    C5G C6G . 1.51(2) ?
    C5G H5G1 . 0.99 ?
    C5G H5G2 . 0.99 ?
    C6G C7G . 1.51(2) ?
    C6G H6G1 . 0.99 ?
    C6G H6G2 . 0.99 ?
    C7G C8G . 1.54(2) ?
    C7G H7G1 . 0.99 ?
    C7G H7G2 . 0.99 ?
    C8G C9G . 1.50(2) ?
    C8G H8G1 . 0.99 ?
    C8G H8G2 . 0.99 ?
    C9G C10G . 1.53(2) ?
    C9G H9G1 . 0.99 ?
    C9G H9G2 . 0.99 ?
    C10G C11G . 1.55(2) ?
    C10G H10M . 0.99 ?
    C10G H10N . 0.99 ?
    C11G C12G . 1.51(2) ?
    C11G H11M . 0.99 ?
    C11G H11N . 0.99 ?
    C12G H12S . 0.98 ?
    C12G H12T . 0.98 ?
    C12G H12U . 0.98 ?
    C1H C2H . 1.52(2) ?
    C1H H1H1 . 0.99 ?
    C1H H1H2 . 0.99 ?
    C2H C3H . 1.51(2) ?
    C2H H2H1 . 0.99 ?
    C2H H2H2 . 0.99 ?
    C3H C4H . 1.52(2) ?
    C3H H3H1 . 0.99 ?
    C3H H3H2 . 0.99 ?
    C4H C5H . 1.51(2) ?
    C4H H4H1 . 0.99 ?
    C4H H4H2 . 0.99 ?
    C5H C6H . 1.52(2) ?
    C5H H5H1 . 0.99 ?
    C5H H5H2 . 0.99 ?
    C6H C7H . 1.56(2) ?
    C6H H6H1 . 0.99 ?
    C6H H6H2 . 0.99 ?
    C7H C8H . 1.51(2) ?
    C7H H7H1 . 0.99 ?
    C7H H7H2 . 0.99 ?
    C8H C9H . 1.53(2) ?
    C8H H8H1 . 0.99 ?
    C8H H8H2 . 0.99 ?
    C9H C10H . 1.52(2) ?
    C9H H9H1 . 0.99 ?
    C9H H9H2 . 0.99 ?
    C10H C11H . 1.52(2) ?
    C10H H10O . 0.99 ?
    C10H H10P . 0.99 ?
    C11H C12H . 1.53(2) ?
    C11H H11O . 0.99 ?
    C11H H11P . 0.99 ?
    C12H H22C . 0.98 ?
    C12H H22A . 0.98 ?
    C12H H22B . 0.98 ?
    C1I C2I . 1.60(3) ?
    C1I H1I1 . 0.99 ?
    C1I H1I2 . 0.99 ?
    C2I C3I . 1.37(3) ?
    C2I H2I1 . 0.99 ?
    C2I H2I2 . 0.99 ?
    C3I C4I . 1.57(3) ?
    C3I H3I1 . 0.99 ?
    C3I H3I2 . 0.99 ?
    C4I C5I . 1.39(3) ?
    C4I H4I1 . 0.99 ?
    C4I H4I2 . 0.99 ?
    C5I C6I . 1.54(3) ?
    C5I H5I1 . 0.99 ?
    C5I H5I2 . 0.99 ?
    C6I C7I . 1.45(3) ?
    C6I H6I1 . 0.99 ?
    C6I H6I2 . 0.99 ?
    C7I C8I . 1.53(3) ?
    C7I H7I1 . 0.99 ?
    C7I H7I2 . 0.99 ?
    C8I C9I . 1.51(3) ?
    C8I H8I1 . 0.99 ?
    C8I H8I2 . 0.99 ?
    C9I C10I . 1.49(3) ?
    C9I H9I1 . 0.99 ?
    C9I H9I2 . 0.99 ?
    C10I C11I . 1.61(3) ?
    C10I H10Q . 0.99 ?
    C10I H10R . 0.99 ?
    C11I C12I . 1.41(3) ?
    C11I H11Q . 0.99 ?
    C11I H11R . 0.99 ?
    C12I H22F . 0.98 ?
    C12I H22D . 0.98 ?
    C12I H22E . 0.98 ?
    C1J C2J . 1.46(2) ?
    C1J H1J1 . 0.99 ?
    C1J H1J2 . 0.99 ?
    C2J C3J . 1.55(2) ?
    C2J H2J1 . 0.99 ?
    C2J H2J2 . 0.99 ?
    C3J C4J . 1.51(2) ?
    C3J H3J1 . 0.99 ?
    C3J H3J2 . 0.99 ?
    C4J C5J . 1.50(2) ?
    C4J H4J1 . 0.99 ?
    C4J H4J2 . 0.99 ?
    C5J C6J . 1.48(3) ?
    C5J H5J1 . 0.99 ?
    C5J H5J2 . 0.99 ?
    C6J C7J . 1.50(3) ?
    C6J H6J1 . 0.99 ?
    C6J H6J2 . 0.99 ?
    C7J C8J . 1.45(3) ?
    C7J H7J1 . 0.99 ?
    C7J H7J2 . 0.99 ?
    C8J C9J . 1.42(3) ?
    C8J H8J1 . 0.99 ?
    C8J H8J2 . 0.99 ?
    C9J C10J . 1.49(3) ?
    C9J H9J1 . 0.99 ?
    C9J H9J2 . 0.99 ?
    C10J C11J . 1.45(3) ?
    C10J H10S . 0.99 ?
    C10J H10T . 0.99 ?
    C11J C12J . 1.47(3) ?
    C11J H11S . 0.99 ?
    C11J H11T . 0.99 ?
    C12J H22I . 0.98 ?
    C12J H22G . 0.98 ?
    C12J H22H . 0.98 ?
    C1K C2K . 1.53(2) ?
    C1K H1K1 . 0.99 ?
    C1K H1K2 . 0.99 ?
    C2K C3K . 1.54(2) ?
    C2K H2K1 . 0.99 ?
    C2K H2K2 . 0.99 ?
    C3K C4K . 1.49(2) ?
    C3K H3K1 . 0.99 ?
    C3K H3K2 . 0.99 ?
    C4K C5K . 1.53(2) ?
    C4K H4K1 . 0.99 ?
    C4K H4K2 . 0.99 ?
    C5K C6K . 1.53(2) ?
    C5K H5K1 . 0.99 ?
    C5K H5K2 . 0.99 ?
    C6K C7K . 1.52(2) ?
    C6K H6K1 . 0.99 ?
    C6K H6K2 . 0.99 ?
    C7K C8K . 1.51(2) ?
    C7K H7K1 . 0.99 ?
    C7K H7K2 . 0.99 ?
    C8K C9K . 1.56(2) ?
    C8K H8K1 . 0.99 ?
    C8K H8K2 . 0.99 ?
    C9K C10K . 1.51(2) ?
    C9K H9K1 . 0.99 ?
    C9K H9K2 . 0.99 ?
    C10K C11K . 1.52(2) ?
    C10K H10U . 0.99 ?
    C10K H10V . 0.99 ?
    C11K C12K . 1.52(2) ?
    C11K H11U . 0.99 ?
    C11K H11V . 0.99 ?
    C12K H22J . 0.98 ?
    C12K H22K . 0.98 ?
    C12K H22L . 0.98 ?
    C1L C2L . 1.54(2) ?
    C1L H1L1 . 0.99 ?
    C1L H1L2 . 0.99 ?
    C2L C3L . 1.48(2) ?
    C2L H2L1 . 0.99 ?
    C2L H2L2 . 0.99 ?
    C3L C4L . 1.51(2) ?
    C3L H3L1 . 0.99 ?
    C3L H3L2 . 0.99 ?
    C4L C5L . 1.53(2) ?
    C4L H4L1 . 0.99 ?
    C4L H4L2 . 0.99 ?
    C5L C6L . 1.51(2) ?
    C5L H5L1 . 0.99 ?
    C5L H5L2 . 0.99 ?
    C6L C7L . 1.51(2) ?
    C6L H6L1 . 0.99 ?
    C6L H6L2 . 0.99 ?
    C7L C8L . 1.49(2) ?
    C7L H7L1 . 0.99 ?
    C7L H7L2 . 0.99 ?
    C8L C9L . 1.49(2) ?
    C8L H8L1 . 0.99 ?
    C8L H8L2 . 0.99 ?
    C9L C10L . 1.50(2) ?
    C9L H9L1 . 0.99 ?
    C9L H9L2 . 0.99 ?
    C10L C11L . 1.46(3) ?
    C10L H10W . 0.99 ?
    C10L H10$ . 0.99 ?
    C11L C12L . 1.51(3) ?
    C11L H11W . 0.99 ?
    C11L H11$ . 0.99 ?
    C12L H22O . 0.98 ?
    C12L H22M . 0.98 ?
    C12L H22N . 0.98 ?
    Sb1 F3B . 1.65(4) ?
    Sb1 F2B . 1.79(5) ?
    Sb1 F4A . 1.816(14) ?
    Sb1 F1A . 1.826(14) ?
    Sb1 F3A . 1.845(15) ?
    Sb1 F6 . 1.864(11) ?
    Sb1 F5 . 1.870(10) ?
    Sb1 F1B . 1.90(5) ?
    Sb1 F2A . 1.912(17) ?
    Sb1 F4B . 1.95(5) ?

loop_
    _geom_angle_atom_site_label_1
    _geom_angle_atom_site_label_2
    _geom_angle_atom_site_label_3
    _geom_angle_site_symmetry_1
    _geom_angle_site_symmetry_3
    _geom_angle
    _geom_angle_publ_flag
    S1 Pt1 S12 . . 96.46(16) ?
    S1 Pt1 S2 . . 83.22(15) ?
    S12 Pt1 S2 . . 171.85(15) ?
    S1 Pt1 S11 . . 178.75(16) ?
    S12 Pt1 S11 . . 82.30(15) ?
    S2 Pt1 S11 . . 97.98(15) ?
    S1 Pt1 Ag1 . . 87.22(11) ?
    S12 Pt1 Ag1 . . 88.68(11) ?
    S2 Pt1 Ag1 . . 83.17(10) ?
    S11 Pt1 Ag1 . . 92.59(10) ?
    S1 Pt1 Pt6 . . 131.31(11) ?
    S12 Pt1 Pt6 . . 48.01(11) ?
    S2 Pt1 Pt6 . . 127.00(10) ?
    S11 Pt1 Pt6 . . 47.61(10) ?
    Ag1 Pt1 Pt6 . . 64.00(3) ?
    S1 Pt1 Pt2 . . 47.46(11) ?
    S12 Pt1 Pt2 . . 127.37(11) ?
    S2 Pt1 Pt2 . . 47.41(10) ?
    S11 Pt1 Pt2 . . 133.32(11) ?
    Ag1 Pt1 Pt2 . . 58.40(3) ?
    Pt6 Pt1 Pt2 . . 122.39(3) ?
    S2 Pt2 S1 . . 82.57(15) ?
    S2 Pt2 S3 . . 99.37(15) ?
    S1 Pt2 S3 . . 175.83(14) ?
    S2 Pt2 S4 . . 174.17(14) ?
    S1 Pt2 S4 . . 96.88(16) ?
    S3 Pt2 S4 . . 81.56(15) ?
    S2 Pt2 Pt3 . . 126.55(10) ?
    S1 Pt2 Pt3 . . 131.89(11) ?
    S3 Pt2 Pt3 . . 49.54(9) ?
    S4 Pt2 Pt3 . . 50.08(10) ?
    S2 Pt2 Ag1 . . 83.52(10) ?
    S1 Pt2 Ag1 . . 87.44(11) ?
    S3 Pt2 Ag1 . . 96.43(10) ?
    S4 Pt2 Ag1 . . 90.66(10) ?
    Pt3 Pt2 Ag1 . . 63.26(3) ?
    S2 Pt2 Pt1 . . 47.12(11) ?
    S1 Pt2 Pt1 . . 46.96(10) ?
    S3 Pt2 Pt1 . . 136.74(10) ?
    S4 Pt2 Pt1 . . 128.98(11) ?
    Pt3 Pt2 Pt1 . . 122.37(3) ?
    Ag1 Pt2 Pt1 . . 59.12(3) ?
    S6 Pt3 S5 . . 82.76(13) ?
    S6 Pt3 S3 . . 98.13(14) ?
    S5 Pt3 S3 . . 178.89(14) ?
    S6 Pt3 S4 . . 171.01(15) ?
    S5 Pt3 S4 . . 97.90(14) ?
    S3 Pt3 S4 . . 81.33(14) ?
    S6 Pt3 Pt2 . . 123.62(10) ?
    S5 Pt3 Pt2 . . 130.34(11) ?
    S3 Pt3 Pt2 . . 49.63(11) ?
    S4 Pt3 Pt2 . . 49.67(10) ?
    S6 Pt3 Pt4 . . 48.33(9) ?
    S5 Pt3 Pt4 . . 48.41(10) ?
    S3 Pt3 Pt4 . . 132.70(10) ?
    S4 Pt3 Pt4 . . 126.29(10) ?
    Pt2 Pt3 Pt4 . . 115.57(3) ?
    S6 Pt3 Ag1 . . 84.13(10) ?
    S5 Pt3 Ag1 . . 88.04(10) ?
    S3 Pt3 Ag1 . . 92.71(11) ?
    S4 Pt3 Ag1 . . 86.93(11) ?
    Pt2 Pt3 Ag1 . . 58.47(3) ?
    Pt4 Pt3 Ag1 . . 57.11(3) ?
    S8 Pt4 S7 . . 83.54(14) ?
    S8 Pt4 S6 . . 172.89(14) ?
    S7 Pt4 S6 . . 96.19(14) ?
    S8 Pt4 S5 . . 97.14(14) ?
    S7 Pt4 S5 . . 178.07(14) ?
    S6 Pt4 S5 . . 82.91(14) ?
    S8 Pt4 Ag1 . . 84.48(10) ?
    S7 Pt4 Ag1 . . 85.75(10) ?
    S6 Pt4 Ag1 . . 88.41(10) ?
    S5 Pt4 Ag1 . . 92.51(10) ?
    S8 Pt4 Pt3 . . 126.97(10) ?
    S7 Pt4 Pt3 . . 129.75(10) ?
    S6 Pt4 Pt3 . . 48.46(10) ?
    S5 Pt4 Pt3 . . 48.48(9) ?
    Ag1 Pt4 Pt3 . . 62.86(3) ?
    S8 Pt4 Pt5 . . 47.22(10) ?
    S7 Pt4 Pt5 . . 47.39(10) ?
    S6 Pt4 Pt5 . . 128.33(10) ?
    S5 Pt4 Pt5 . . 132.13(11) ?
    Ag1 Pt4 Pt5 . . 58.85(3) ?
    Pt3 Pt4 Pt5 . . 121.71(3) ?
    S8 Pt5 S7 . . 83.42(14) ?
    S8 Pt5 S10 . . 178.12(14) ?
    S7 Pt5 S10 . . 96.42(15) ?
    S8 Pt5 S9 . . 98.96(15) ?
    S7 Pt5 S9 . . 177.31(15) ?
    S10 Pt5 S9 . . 81.24(15) ?
    S8 Pt5 Pt6 . . 129.00(10) ?
    S7 Pt5 Pt6 . . 129.63(10) ?
    S10 Pt5 Pt6 . . 49.86(10) ?
    S9 Pt5 Pt6 . . 49.53(10) ?
    S8 Pt5 Ag1 . . 83.86(10) ?
    S7 Pt5 Ag1 . . 85.05(10) ?
    S10 Pt5 Ag1 . . 94.26(10) ?
    S9 Pt5 Ag1 . . 96.42(11) ?
    Pt6 Pt5 Ag1 . . 65.51(3) ?
    S8 Pt5 Pt4 . . 47.20(10) ?
    S7 Pt5 Pt4 . . 47.26(10) ?
    S10 Pt5 Pt4 . . 131.59(11) ?
    S9 Pt5 Pt4 . . 135.41(12) ?
    Pt6 Pt5 Pt4 . . 123.53(3) ?
    Ag1 Pt5 Pt4 . . 58.02(3) ?
    S11 Pt6 S12 . . 82.49(15) ?
    S11 Pt6 S9 . . 177.81(16) ?
    S12 Pt6 S9 . . 98.13(16) ?
    S11 Pt6 S10 . . 97.65(14) ?
    S12 Pt6 S10 . . 171.48(15) ?
    S9 Pt6 S10 . . 81.42(15) ?
    S11 Pt6 Pt5 . . 128.09(11) ?
    S12 Pt6 Pt5 . . 123.89(11) ?
    S9 Pt6 Pt5 . . 49.87(11) ?
    S10 Pt6 Pt5 . . 49.77(10) ?
    S11 Pt6 Pt1 . . 48.20(10) ?
    S12 Pt6 Pt1 . . 47.67(11) ?
    S9 Pt6 Pt1 . . 130.99(12) ?
    S10 Pt6 Pt1 . . 126.95(11) ?
    Pt5 Pt6 Pt1 . . 114.40(3) ?
    S11 Pt6 Ag1 . . 87.65(11) ?
    S12 Pt6 Ag1 . . 83.41(11) ?
    S9 Pt6 Ag1 . . 90.33(12) ?
    S10 Pt6 Ag1 . . 88.08(11) ?
    Pt5 Pt6 Ag1 . . 57.31(3) ?
    Pt1 Pt6 Ag1 . . 57.10(3) ?
    C1A S1 Pt1 . . 110.2(8) ?
    C1A S1 Pt2 . . 109.3(9) ?
    Pt1 S1 Pt2 . . 85.58(14) ?
    C1B S2 Pt1 . . 108.9(6) ?
    C1B S2 Pt2 . . 105.1(6) ?
    Pt1 S2 Pt2 . . 85.47(14) ?
    C1C S3 Pt3 . . 113.6(5) ?
    C1C S3 Pt2 . . 112.8(6) ?
    Pt3 S3 Pt2 . . 80.83(13) ?
    C1D S4 Pt2 . . 106.1(5) ?
    C1D S4 Pt3 . . 107.1(5) ?
    Pt2 S4 Pt3 . . 80.24(13) ?
    C1E S5 Pt4 . . 108.7(5) ?
    C1E S5 Pt3 . . 109.4(5) ?
    Pt4 S5 Pt3 . . 83.11(12) ?
    C1F S6 Pt4 . . 108.6(5) ?
    C1F S6 Pt3 . . 108.5(5) ?
    Pt4 S6 Pt3 . . 83.21(13) ?
    C1G S7 Pt4 . . 110.1(5) ?
    C1G S7 Pt5 . . 105.4(5) ?
    Pt4 S7 Pt5 . . 85.35(13) ?
    C1H S8 Pt4 . . 107.9(6) ?
    C1H S8 Pt5 . . 104.5(5) ?
    Pt4 S8 Pt5 . . 85.58(13) ?
    C1I S9 Pt6 . . 114.2(7) ?
    C1I S9 Pt5 . . 113.3(7) ?
    Pt6 S9 Pt5 . . 80.60(14) ?
    C1J S10 Pt5 . . 102.5(6) ?
    C1J S10 Pt6 . . 109.9(6) ?
    Pt5 S10 Pt6 . . 80.37(13) ?
    C1K S11 Pt6 . . 108.6(5) ?
    C1K S11 Pt1 . . 108.1(5) ?
    Pt6 S11 Pt1 . . 84.19(13) ?
    C1L S12 Pt1 . . 108.4(6) ?
    C1L S12 Pt6 . . 109.2(6) ?
    Pt1 S12 Pt6 . . 84.32(15) ?
    Pt4 Ag1 Pt5 . . 63.13(3) ?
    Pt4 Ag1 Pt2 . . 118.30(5) ?
    Pt5 Ag1 Pt2 . . 178.56(5) ?
    Pt4 Ag1 Pt1 . . 178.66(5) ?
    Pt5 Ag1 Pt1 . . 116.08(4) ?
    Pt2 Ag1 Pt1 . . 62.49(3) ?
    Pt4 Ag1 Pt3 . . 60.03(3) ?
    Pt5 Ag1 Pt3 . . 123.15(4) ?
    Pt2 Ag1 Pt3 . . 58.28(3) ?
    Pt1 Ag1 Pt3 . . 120.77(4) ?
    Pt4 Ag1 Pt6 . . 120.31(4) ?
    Pt5 Ag1 Pt6 . . 57.18(3) ?
    Pt2 Ag1 Pt6 . . 121.39(4) ?
    Pt1 Ag1 Pt6 . . 58.90(3) ?
    Pt3 Ag1 Pt6 . . 179.53(5) ?
    C2A C1A S1 . . 115.9(17) ?
    C2A C1A H1A1 . . 108.3 ?
    S1 C1A H1A1 . . 108.3 ?
    C2A C1A H1A2 . . 108.3 ?
    S1 C1A H1A2 . . 108.3 ?
    H1A1 C1A H1A2 . . 107.4 ?
    C1A C2A C3A . . 96.5(18) ?
    C1A C2A H2A1 . . 112.5 ?
    C3A C2A H2A1 . . 112.5 ?
    C1A C2A H2A2 . . 112.5 ?
    C3A C2A H2A2 . . 112.5 ?
    H2A1 C2A H2A2 . . 110.0 ?
    C4A C3A C2A . . 111.2(13) ?
    C4A C3A H3A1 . . 109.4 ?
    C2A C3A H3A1 . . 109.4 ?
    C4A C3A H3A2 . . 109.4 ?
    C2A C3A H3A2 . . 109.4 ?
    H3A1 C3A H3A2 . . 108.0 ?
    C3A C4A C5A . . 113.2(13) ?
    C3A C4A H4A1 . . 108.9 ?
    C5A C4A H4A1 . . 108.9 ?
    C3A C4A H4A2 . . 108.9 ?
    C5A C4A H4A2 . . 108.9 ?
    H4A1 C4A H4A2 . . 107.7 ?
    C6A C5A C4A . . 107.8(12) ?
    C6A C5A H5A1 . . 110.2 ?
    C4A C5A H5A1 . . 110.2 ?
    C6A C5A H5A2 . . 110.2 ?
    C4A C5A H5A2 . . 110.2 ?
    H5A1 C5A H5A2 . . 108.5 ?
    C7A C6A C5A . . 113.1(13) ?
    C7A C6A H6A1 . . 108.9 ?
    C5A C6A H6A1 . . 108.9 ?
    C7A C6A H6A2 . . 108.9 ?
    C5A C6A H6A2 . . 108.9 ?
    H6A1 C6A H6A2 . . 107.8 ?
    C8A C7A C6A . . 107.(2) ?
    C8A C7A H7A1 . . 110.3 ?
    C6A C7A H7A1 . . 110.3 ?
    C8A C7A H7A2 . . 110.3 ?
    C6A C7A H7A2 . . 110.3 ?
    H7A1 C7A H7A2 . . 108.6 ?
    C7A C8A C9A . . 112.(2) ?
    C7A C8A H8A1 . . 109.1 ?
    C9A C8A H8A1 . . 109.1 ?
    C7A C8A H8A2 . . 109.1 ?
    C9A C8A H8A2 . . 109.1 ?
    H8A1 C8A H8A2 . . 107.9 ?
    C8A C9A C10A . . 119.(3) ?
    C8A C9A H9A1 . . 107.6 ?
    C10A C9A H9A1 . . 107.6 ?
    C8A C9A H9A2 . . 107.6 ?
    C10A C9A H9A2 . . 107.6 ?
    H9A1 C9A H9A2 . . 107.0 ?
    C11A C10A C9A . . 125.(3) ?
    C11A C10A H10A . . 106.2 ?
    C9A C10A H10A . . 106.2 ?
    C11A C10A H10B . . 106.2 ?
    C9A C10A H10B . . 106.2 ?
    H10A C10A H10B . . 106.4 ?
    C10A C11A C12A . . 125.(3) ?
    C10A C11A H11A . . 106.1 ?
    C12A C11A H11A . . 106.1 ?
    C10A C11A H11B . . 106.1 ?
    C12A C11A H11B . . 106.1 ?
    H11A C11A H11B . . 106.3 ?
    C11A C12A H12A . . 109.5 ?
    C11A C12A H12B . . 109.5 ?
    H12A C12A H12B . . 109.5 ?
    C11A C12A H12C . . 109.5 ?
    H12A C12A H12C . . 109.5 ?
    H12B C12A H12C . . 109.5 ?
    C2B C1B S2 . . 111.6(13) ?
    C2B C1B H1B1 . . 109.3 ?
    S2 C1B H1B1 . . 109.3 ?
    C2B C1B H1B2 . . 109.3 ?
    S2 C1B H1B2 . . 109.3 ?
    H1B1 C1B H1B2 . . 108.0 ?
    C1B C2B C3B . . 115.2(15) ?
    C1B C2B H2B1 . . 108.5 ?
    C3B C2B H2B1 . . 108.5 ?
    C1B C2B H2B2 . . 108.5 ?
    C3B C2B H2B2 . . 108.5 ?
    H2B1 C2B H2B2 . . 107.5 ?
    C4B C3B C2B . . 115.6(15) ?
    C4B C3B H3B1 . . 108.4 ?
    C2B C3B H3B1 . . 108.4 ?
    C4B C3B H3B2 . . 108.4 ?
    C2B C3B H3B2 . . 108.4 ?
    H3B1 C3B H3B2 . . 107.4 ?
    C3B C4B C5B . . 114.5(15) ?
    C3B C4B H4B1 . . 108.6 ?
    C5B C4B H4B1 . . 108.6 ?
    C3B C4B H4B2 . . 108.6 ?
    C5B C4B H4B2 . . 108.6 ?
    H4B1 C4B H4B2 . . 107.6 ?
    C6B C5B C4B . . 114.3(15) ?
    C6B C5B H5B1 . . 108.7 ?
    C4B C5B H5B1 . . 108.7 ?
    C6B C5B H5B2 . . 108.7 ?
    C4B C5B H5B2 . . 108.7 ?
    H5B1 C5B H5B2 . . 107.6 ?
    C5B C6B C7B . . 111.7(15) ?
    C5B C6B H6B1 . . 109.3 ?
    C7B C6B H6B1 . . 109.3 ?
    C5B C6B H6B2 . . 109.3 ?
    C7B C6B H6B2 . . 109.3 ?
    H6B1 C6B H6B2 . . 107.9 ?
    C8B C7B C6B . . 113.2(15) ?
    C8B C7B H7B1 . . 108.9 ?
    C6B C7B H7B1 . . 108.9 ?
    C8B C7B H7B2 . . 108.9 ?
    C6B C7B H7B2 . . 108.9 ?
    H7B1 C7B H7B2 . . 107.8 ?
    C9B C8B C7B . . 113.4(16) ?
    C9B C8B H8B1 . . 108.9 ?
    C7B C8B H8B1 . . 108.9 ?
    C9B C8B H8B2 . . 108.9 ?
    C7B C8B H8B2 . . 108.9 ?
    H8B1 C8B H8B2 . . 107.7 ?
    C8B C9B C10B . . 115.1(16) ?
    C8B C9B H9B1 . . 108.5 ?
    C10B C9B H9B1 . . 108.5 ?
    C8B C9B H9B2 . . 108.5 ?
    C10B C9B H9B2 . . 108.5 ?
    H9B1 C9B H9B2 . . 107.5 ?
    C11B C10B C9B . . 113.9(17) ?
    C11B C10B H10C . . 108.8 ?
    C9B C10B H10C . . 108.8 ?
    C11B C10B H10D . . 108.8 ?
    C9B C10B H10D . . 108.8 ?
    H10C C10B H10D . . 107.7 ?
    C10B C11B C12B . . 118.1(18) ?
    C10B C11B H11C . . 107.8 ?
    C12B C11B H11C . . 107.8 ?
    C10B C11B H11D . . 107.8 ?
    C12B C11B H11D . . 107.8 ?
    H11C C11B H11D . . 107.1 ?
    C11B C12B H12D . . 109.5 ?
    C11B C12B H12E . . 109.5 ?
    H12D C12B H12E . . 109.5 ?
    C11B C12B H12F . . 109.5 ?
    H12D C12B H12F . . 109.5 ?
    H12E C12B H12F . . 109.5 ?
    C2C C1C S3 . . 108.3(11) ?
    C2C C1C H1C1 . . 110.0 ?
    S3 C1C H1C1 . . 110.0 ?
    C2C C1C H1C2 . . 110.0 ?
    S3 C1C H1C2 . . 110.0 ?
    H1C1 C1C H1C2 . . 108.4 ?
    C1C C2C C3C . . 112.5(14) ?
    C1C C2C H2C1 . . 109.1 ?
    C3C C2C H2C1 . . 109.1 ?
    C1C C2C H2C2 . . 109.1 ?
    C3C C2C H2C2 . . 109.1 ?
    H2C1 C2C H2C2 . . 107.8 ?
    C4C C3C C2C . . 113.4(14) ?
    C4C C3C H3C1 . . 108.9 ?
    C2C C3C H3C1 . . 108.9 ?
    C4C C3C H3C2 . . 108.9 ?
    C2C C3C H3C2 . . 108.9 ?
    H3C1 C3C H3C2 . . 107.7 ?
    C3C C4C C5C . . 113.8(14) ?
    C3C C4C H4C1 . . 108.8 ?
    C5C C4C H4C1 . . 108.8 ?
    C3C C4C H4C2 . . 108.8 ?
    C5C C4C H4C2 . . 108.8 ?
    H4C1 C4C H4C2 . . 107.7 ?
    C6C C5C C4C . . 113.9(14) ?
    C6C C5C H5C1 . . 108.8 ?
    C4C C5C H5C1 . . 108.8 ?
    C6C C5C H5C2 . . 108.8 ?
    C4C C5C H5C2 . . 108.8 ?
    H5C1 C5C H5C2 . . 107.7 ?
    C5C C6C C7C . . 113.5(15) ?
    C5C C6C H6C1 . . 108.9 ?
    C7C C6C H6C1 . . 108.9 ?
    C5C C6C H6C2 . . 108.9 ?
    C7C C6C H6C2 . . 108.9 ?
    H6C1 C6C H6C2 . . 107.7 ?
    C6C C7C C8C . . 115.6(14) ?
    C6C C7C H7C1 . . 108.4 ?
    C8C C7C H7C1 . . 108.4 ?
    C6C C7C H7C2 . . 108.4 ?
    C8C C7C H7C2 . . 108.4 ?
    H7C1 C7C H7C2 . . 107.4 ?
    C9C C8C C7C . . 113.2(15) ?
    C9C C8C H8C1 . . 108.9 ?
    C7C C8C H8C1 . . 108.9 ?
    C9C C8C H8C2 . . 108.9 ?
    C7C C8C H8C2 . . 108.9 ?
    H8C1 C8C H8C2 . . 107.8 ?
    C8C C9C C10C . . 112.3(15) ?
    C8C C9C H9C1 . . 109.1 ?
    C10C C9C H9C1 . . 109.1 ?
    C8C C9C H9C2 . . 109.1 ?
    C10C C9C H9C2 . . 109.1 ?
    H9C1 C9C H9C2 . . 107.9 ?
    C11C C10C C9C . . 111.9(16) ?
    C11C C10C H10E . . 109.2 ?
    C9C C10C H10E . . 109.2 ?
    C11C C10C H10F . . 109.2 ?
    C9C C10C H10F . . 109.2 ?
    H10E C10C H10F . . 107.9 ?
    C10C C11C C12C . . 112.1(16) ?
    C10C C11C H11E . . 109.2 ?
    C12C C11C H11E . . 109.2 ?
    C10C C11C H11F . . 109.2 ?
    C12C C11C H11F . . 109.2 ?
    H11E C11C H11F . . 107.9 ?
    C11C C12C H12G . . 109.5 ?
    C11C C12C H12H . . 109.5 ?
    H12G C12C H12H . . 109.5 ?
    C11C C12C H12I . . 109.5 ?
    H12G C12C H12I . . 109.5 ?
    H12H C12C H12I . . 109.5 ?
    C2D C1D S4 . . 113.0(12) ?
    C2D C1D H1D1 . . 109.0 ?
    S4 C1D H1D1 . . 109.0 ?
    C2D C1D H1D2 . . 109.0 ?
    S4 C1D H1D2 . . 109.0 ?
    H1D1 C1D H1D2 . . 107.8 ?
    C1D C2D C3D . . 110.4(14) ?
    C1D C2D H2D1 . . 109.6 ?
    C3D C2D H2D1 . . 109.6 ?
    C1D C2D H2D2 . . 109.6 ?
    C3D C2D H2D2 . . 109.6 ?
    H2D1 C2D H2D2 . . 108.1 ?
    C4D C3D C2D . . 115.6(13) ?
    C4D C3D H3D1 . . 108.4 ?
    C2D C3D H3D1 . . 108.4 ?
    C4D C3D H3D2 . . 108.4 ?
    C2D C3D H3D2 . . 108.4 ?
    H3D1 C3D H3D2 . . 107.4 ?
    C5D C4D C3D . . 114.5(15) ?
    C5D C4D H4D1 . . 108.6 ?
    C3D C4D H4D1 . . 108.6 ?
    C5D C4D H4D2 . . 108.6 ?
    C3D C4D H4D2 . . 108.6 ?
    H4D1 C4D H4D2 . . 107.6 ?
    C6D C5D C4D . . 113.7(15) ?
    C6D C5D H5D1 . . 108.8 ?
    C4D C5D H5D1 . . 108.8 ?
    C6D C5D H5D2 . . 108.8 ?
    C4D C5D H5D2 . . 108.8 ?
    H5D1 C5D H5D2 . . 107.7 ?
    C5D C6D C7D . . 115.4(15) ?
    C5D C6D H6D1 . . 108.4 ?
    C7D C6D H6D1 . . 108.4 ?
    C5D C6D H6D2 . . 108.4 ?
    C7D C6D H6D2 . . 108.4 ?
    H6D1 C6D H6D2 . . 107.5 ?
    C8D C7D C6D . . 114.3(15) ?
    C8D C7D H7D1 . . 108.7 ?
    C6D C7D H7D1 . . 108.7 ?
    C8D C7D H7D2 . . 108.7 ?
    C6D C7D H7D2 . . 108.7 ?
    H7D1 C7D H7D2 . . 107.6 ?
    C7D C8D C9D . . 112.9(16) ?
    C7D C8D H8D1 . . 109.0 ?
    C9D C8D H8D1 . . 109.0 ?
    C7D C8D H8D2 . . 109.0 ?
    C9D C8D H8D2 . . 109.0 ?
    H8D1 C8D H8D2 . . 107.8 ?
    C10D C9D C8D . . 112.7(16) ?
    C10D C9D H9D1 . . 109.1 ?
    C8D C9D H9D1 . . 109.1 ?
    C10D C9D H9D2 . . 109.1 ?
    C8D C9D H9D2 . . 109.1 ?
    H9D1 C9D H9D2 . . 107.8 ?
    C9D C10D C11D . . 112.5(16) ?
    C9D C10D H10G . . 109.1 ?
    C11D C10D H10G . . 109.1 ?
    C9D C10D H10H . . 109.1 ?
    C11D C10D H10H . . 109.1 ?
    H10G C10D H10H . . 107.8 ?
    C12D C11D C10D . . 113.6(17) ?
    C12D C11D H11G . . 108.8 ?
    C10D C11D H11G . . 108.8 ?
    C12D C11D H11H . . 108.8 ?
    C10D C11D H11H . . 108.8 ?
    H11G C11D H11H . . 107.7 ?
    C11D C12D H12J . . 109.5 ?
    C11D C12D H12K . . 109.5 ?
    H12J C12D H12K . . 109.5 ?
    C11D C12D H12L . . 109.5 ?
    H12J C12D H12L . . 109.5 ?
    H12K C12D H12L . . 109.5 ?
    C2E C1E S5 . . 112.3(11) ?
    C2E C1E H1E1 . . 109.1 ?
    S5 C1E H1E1 . . 109.1 ?
    C2E C1E H1E2 . . 109.1 ?
    S5 C1E H1E2 . . 109.1 ?
    H1E1 C1E H1E2 . . 107.9 ?
    C1E C2E C3E . . 110.7(13) ?
    C1E C2E H2E1 . . 109.5 ?
    C3E C2E H2E1 . . 109.5 ?
    C1E C2E H2E2 . . 109.5 ?
    C3E C2E H2E2 . . 109.5 ?
    H2E1 C2E H2E2 . . 108.1 ?
    C2E C3E C4E . . 111.4(13) ?
    C2E C3E H3E1 . . 109.3 ?
    C4E C3E H3E1 . . 109.3 ?
    C2E C3E H3E2 . . 109.3 ?
    C4E C3E H3E2 . . 109.3 ?
    H3E1 C3E H3E2 . . 108.0 ?
    C5E C4E C3E . . 112.8(13) ?
    C5E C4E H4E1 . . 109.0 ?
    C3E C4E H4E1 . . 109.0 ?
    C5E C4E H4E2 . . 109.0 ?
    C3E C4E H4E2 . . 109.0 ?
    H4E1 C4E H4E2 . . 107.8 ?
    C4E C5E C6E . . 112.3(13) ?
    C4E C5E H5E1 . . 109.1 ?
    C6E C5E H5E1 . . 109.1 ?
    C4E C5E H5E2 . . 109.1 ?
    C6E C5E H5E2 . . 109.1 ?
    H5E1 C5E H5E2 . . 107.9 ?
    C7E C6E C5E . . 113.3(13) ?
    C7E C6E H6E1 . . 108.9 ?
    C5E C6E H6E1 . . 108.9 ?
    C7E C6E H6E2 . . 108.9 ?
    C5E C6E H6E2 . . 108.9 ?
    H6E1 C6E H6E2 . . 107.7 ?
    C6E C7E C8E . . 114.1(13) ?
    C6E C7E H7E1 . . 108.7 ?
    C8E C7E H7E1 . . 108.7 ?
    C6E C7E H7E2 . . 108.7 ?
    C8E C7E H7E2 . . 108.7 ?
    H7E1 C7E H7E2 . . 107.6 ?
    C9E C8E C7E . . 115.2(14) ?
    C9E C8E H8E1 . . 108.5 ?
    C7E C8E H8E1 . . 108.5 ?
    C9E C8E H8E2 . . 108.5 ?
    C7E C8E H8E2 . . 108.5 ?
    H8E1 C8E H8E2 . . 107.5 ?
    C8E C9E C10E . . 114.3(14) ?
    C8E C9E H9E1 . . 108.7 ?
    C10E C9E H9E1 . . 108.7 ?
    C8E C9E H9E2 . . 108.7 ?
    C10E C9E H9E2 . . 108.7 ?
    H9E1 C9E H9E2 . . 107.6 ?
    C9E C10E C11E . . 114.5(15) ?
    C9E C10E H10I . . 108.6 ?
    C11E C10E H10I . . 108.6 ?
    C9E C10E H10J . . 108.6 ?
    C11E C10E H10J . . 108.6 ?
    H10I C10E H10J . . 107.6 ?
    C10E C11E C12E . . 112.2(16) ?
    C10E C11E H11I . . 109.2 ?
    C12E C11E H11I . . 109.2 ?
    C10E C11E H11J . . 109.2 ?
    C12E C11E H11J . . 109.2 ?
    H11I C11E H11J . . 107.9 ?
    C11E C12E H12M . . 109.5 ?
    C11E C12E H12N . . 109.5 ?
    H12M C12E H12N . . 109.5 ?
    C11E C12E H12O . . 109.5 ?
    H12M C12E H12O . . 109.5 ?
    H12N C12E H12O . . 109.5 ?
    C2F C1F S6 . . 108.7(10) ?
    C2F C1F H1F1 . . 110.0 ?
    S6 C1F H1F1 . . 110.0 ?
    C2F C1F H1F2 . . 110.0 ?
    S6 C1F H1F2 . . 110.0 ?
    H1F1 C1F H1F2 . . 108.3 ?
    C3F C2F C1F . . 113.6(12) ?
    C3F C2F H2F1 . . 108.8 ?
    C1F C2F H2F1 . . 108.8 ?
    C3F C2F H2F2 . . 108.8 ?
    C1F C2F H2F2 . . 108.8 ?
    H2F1 C2F H2F2 . . 107.7 ?
    C4F C3F C2F . . 112.4(13) ?
    C4F C3F H3F1 . . 109.1 ?
    C2F C3F H3F1 . . 109.1 ?
    C4F C3F H3F2 . . 109.1 ?
    C2F C3F H3F2 . . 109.1 ?
    H3F1 C3F H3F2 . . 107.9 ?
    C3F C4F C5F . . 115.7(13) ?
    C3F C4F H4F1 . . 108.4 ?
    C5F C4F H4F1 . . 108.4 ?
    C3F C4F H4F2 . . 108.4 ?
    C5F C4F H4F2 . . 108.4 ?
    H4F1 C4F H4F2 . . 107.4 ?
    C6F C5F C4F . . 115.0(13) ?
    C6F C5F H5F1 . . 108.5 ?
    C4F C5F H5F1 . . 108.5 ?
    C6F C5F H5F2 . . 108.5 ?
    C4F C5F H5F2 . . 108.5 ?
    H5F1 C5F H5F2 . . 107.5 ?
    C5F C6F C7F . . 113.1(14) ?
    C5F C6F H6F1 . . 109.0 ?
    C7F C6F H6F1 . . 109.0 ?
    C5F C6F H6F2 . . 109.0 ?
    C7F C6F H6F2 . . 109.0 ?
    H6F1 C6F H6F2 . . 107.8 ?
    C6F C7F C8F . . 113.7(14) ?
    C6F C7F H7F1 . . 108.8 ?
    C8F C7F H7F1 . . 108.8 ?
    C6F C7F H7F2 . . 108.8 ?
    C8F C7F H7F2 . . 108.8 ?
    H7F1 C7F H7F2 . . 107.7 ?
    C9F C8F C7F . . 111.4(15) ?
    C9F C8F H8F1 . . 109.3 ?
    C7F C8F H8F1 . . 109.3 ?
    C9F C8F H8F2 . . 109.3 ?
    C7F C8F H8F2 . . 109.3 ?
    H8F1 C8F H8F2 . . 108.0 ?
    C8F C9F C10F . . 113.7(15) ?
    C8F C9F H9F1 . . 108.8 ?
    C10F C9F H9F1 . . 108.8 ?
    C8F C9F H9F2 . . 108.8 ?
    C10F C9F H9F2 . . 108.8 ?
    H9F1 C9F H9F2 . . 107.7 ?
    C11F C10F C9F . . 112.2(15) ?
    C11F C10F H10K . . 109.2 ?
    C9F C10F H10K . . 109.2 ?
    C11F C10F H10L . . 109.2 ?
    C9F C10F H10L . . 109.2 ?
    H10K C10F H10L . . 107.9 ?
    C12F C11F C10F . . 112.9(15) ?
    C12F C11F H11K . . 109.0 ?
    C10F C11F H11K . . 109.0 ?
    C12F C11F H11L . . 109.0 ?
    C10F C11F H11L . . 109.0 ?
    H11K C11F H11L . . 107.8 ?
    C11F C12F H12P . . 109.5 ?
    C11F C12F H12Q . . 109.5 ?
    H12P C12F H12Q . . 109.5 ?
    C11F C12F H12R . . 109.5 ?
    H12P C12F H12R . . 109.5 ?
    H12Q C12F H12R . . 109.5 ?
    C2G C1G S7 . . 113.1(11) ?
    C2G C1G H1G1 . . 109.0 ?
    S7 C1G H1G1 . . 109.0 ?
    C2G C1G H1G2 . . 109.0 ?
    S7 C1G H1G2 . . 109.0 ?
    H1G1 C1G H1G2 . . 107.8 ?
    C3G C2G C1G . . 110.2(13) ?
    C3G C2G H2G1 . . 109.6 ?
    C1G C2G H2G1 . . 109.6 ?
    C3G C2G H2G2 . . 109.6 ?
    C1G C2G H2G2 . . 109.6 ?
    H2G1 C2G H2G2 . . 108.1 ?
    C2G C3G C4G . . 115.3(13) ?
    C2G C3G H3G1 . . 108.4 ?
    C4G C3G H3G1 . . 108.4 ?
    C2G C3G H3G2 . . 108.4 ?
    C4G C3G H3G2 . . 108.4 ?
    H3G1 C3G H3G2 . . 107.5 ?
    C3G C4G C5G . . 115.3(14) ?
    C3G C4G H4G1 . . 108.5 ?
    C5G C4G H4G1 . . 108.5 ?
    C3G C4G H4G2 . . 108.5 ?
    C5G C4G H4G2 . . 108.5 ?
    H4G1 C4G H4G2 . . 107.5 ?
    C6G C5G C4G . . 111.9(14) ?
    C6G C5G H5G1 . . 109.2 ?
    C4G C5G H5G1 . . 109.2 ?
    C6G C5G H5G2 . . 109.2 ?
    C4G C5G H5G2 . . 109.2 ?
    H5G1 C5G H5G2 . . 107.9 ?
    C5G C6G C7G . . 113.2(14) ?
    C5G C6G H6G1 . . 108.9 ?
    C7G C6G H6G1 . . 108.9 ?
    C5G C6G H6G2 . . 108.9 ?
    C7G C6G H6G2 . . 108.9 ?
    H6G1 C6G H6G2 . . 107.7 ?
    C6G C7G C8G . . 113.2(14) ?
    C6G C7G H7G1 . . 108.9 ?
    C8G C7G H7G1 . . 108.9 ?
    C6G C7G H7G2 . . 108.9 ?
    C8G C7G H7G2 . . 108.9 ?
    H7G1 C7G H7G2 . . 107.8 ?
    C9G C8G C7G . . 113.5(14) ?
    C9G C8G H8G1 . . 108.9 ?
    C7G C8G H8G1 . . 108.9 ?
    C9G C8G H8G2 . . 108.9 ?
    C7G C8G H8G2 . . 108.9 ?
    H8G1 C8G H8G2 . . 107.7 ?
    C8G C9G C10G . . 110.7(15) ?
    C8G C9G H9G1 . . 109.5 ?
    C10G C9G H9G1 . . 109.5 ?
    C8G C9G H9G2 . . 109.5 ?
    C10G C9G H9G2 . . 109.5 ?
    H9G1 C9G H9G2 . . 108.1 ?
    C9G C10G C11G . . 113.5(15) ?
    C9G C10G H10M . . 108.9 ?
    C11G C10G H10M . . 108.9 ?
    C9G C10G H10N . . 108.9 ?
    C11G C10G H10N . . 108.9 ?
    H10M C10G H10N . . 107.7 ?
    C12G C11G C10G . . 113.5(16) ?
    C12G C11G H11M . . 108.9 ?
    C10G C11G H11M . . 108.9 ?
    C12G C11G H11N . . 108.9 ?
    C10G C11G H11N . . 108.9 ?
    H11M C11G H11N . . 107.7 ?
    C11G C12G H12S . . 109.5 ?
    C11G C12G H12T . . 109.5 ?
    H12S C12G H12T . . 109.5 ?
    C11G C12G H12U . . 109.5 ?
    H12S C12G H12U . . 109.5 ?
    H12T C12G H12U . . 109.5 ?
    C2H C1H S8 . . 110.2(11) ?
    C2H C1H H1H1 . . 109.6 ?
    S8 C1H H1H1 . . 109.6 ?
    C2H C1H H1H2 . . 109.6 ?
    S8 C1H H1H2 . . 109.6 ?
    H1H1 C1H H1H2 . . 108.1 ?
    C3H C2H C1H . . 112.0(13) ?
    C3H C2H H2H1 . . 109.2 ?
    C1H C2H H2H1 . . 109.2 ?
    C3H C2H H2H2 . . 109.2 ?
    C1H C2H H2H2 . . 109.2 ?
    H2H1 C2H H2H2 . . 107.9 ?
    C2H C3H C4H . . 115.2(13) ?
    C2H C3H H3H1 . . 108.5 ?
    C4H C3H H3H1 . . 108.5 ?
    C2H C3H H3H2 . . 108.5 ?
    C4H C3H H3H2 . . 108.5 ?
    H3H1 C3H H3H2 . . 107.5 ?
    C5H C4H C3H . . 113.6(13) ?
    C5H C4H H4H1 . . 108.9 ?
    C3H C4H H4H1 . . 108.9 ?
    C5H C4H H4H2 . . 108.9 ?
    C3H C4H H4H2 . . 108.9 ?
    H4H1 C4H H4H2 . . 107.7 ?
    C4H C5H C6H . . 114.0(14) ?
    C4H C5H H5H1 . . 108.8 ?
    C6H C5H H5H1 . . 108.8 ?
    C4H C5H H5H2 . . 108.8 ?
    C6H C5H H5H2 . . 108.8 ?
    H5H1 C5H H5H2 . . 107.7 ?
    C5H C6H C7H . . 112.8(13) ?
    C5H C6H H6H1 . . 109.0 ?
    C7H C6H H6H1 . . 109.0 ?
    C5H C6H H6H2 . . 109.0 ?
    C7H C6H H6H2 . . 109.0 ?
    H6H1 C6H H6H2 . . 107.8 ?
    C8H C7H C6H . . 112.5(14) ?
    C8H C7H H7H1 . . 109.1 ?
    C6H C7H H7H1 . . 109.1 ?
    C8H C7H H7H2 . . 109.1 ?
    C6H C7H H7H2 . . 109.1 ?
    H7H1 C7H H7H2 . . 107.8 ?
    C7H C8H C9H . . 114.0(14) ?
    C7H C8H H8H1 . . 108.7 ?
    C9H C8H H8H1 . . 108.7 ?
    C7H C8H H8H2 . . 108.7 ?
    C9H C8H H8H2 . . 108.7 ?
    H8H1 C8H H8H2 . . 107.6 ?
    C10H C9H C8H . . 114.0(14) ?
    C10H C9H H9H1 . . 108.8 ?
    C8H C9H H9H1 . . 108.8 ?
    C10H C9H H9H2 . . 108.8 ?
    C8H C9H H9H2 . . 108.8 ?
    H9H1 C9H H9H2 . . 107.7 ?
    C11H C10H C9H . . 113.2(15) ?
    C11H C10H H10O . . 108.9 ?
    C9H C10H H10O . . 108.9 ?
    C11H C10H H10P . . 108.9 ?
    C9H C10H H10P . . 108.9 ?
    H10O C10H H10P . . 107.8 ?
    C10H C11H C12H . . 112.4(15) ?
    C10H C11H H11O . . 109.1 ?
    C12H C11H H11O . . 109.1 ?
    C10H C11H H11P . . 109.1 ?
    C12H C11H H11P . . 109.1 ?
    H11O C11H H11P . . 107.9 ?
    C11H C12H H22C . . 109.5 ?
    C11H C12H H22A . . 109.5 ?
    H22C C12H H22A . . 109.5 ?
    C11H C12H H22B . . 109.5 ?
    H22C C12H H22B . . 109.5 ?
    H22A C12H H22B . . 109.5 ?
    C2I C1I S9 . . 106.1(13) ?
    C2I C1I H1I1 . . 110.5 ?
    S9 C1I H1I1 . . 110.5 ?
    C2I C1I H1I2 . . 110.5 ?
    S9 C1I H1I2 . . 110.5 ?
    H1I1 C1I H1I2 . . 108.7 ?
    C3I C2I C1I . . 112.2(18) ?
    C3I C2I H2I1 . . 109.2 ?
    C1I C2I H2I1 . . 109.2 ?
    C3I C2I H2I2 . . 109.2 ?
    C1I C2I H2I2 . . 109.2 ?
    H2I1 C2I H2I2 . . 107.9 ?
    C2I C3I C4I . . 109.3(19) ?
    C2I C3I H3I1 . . 109.8 ?
    C4I C3I H3I1 . . 109.8 ?
    C2I C3I H3I2 . . 109.8 ?
    C4I C3I H3I2 . . 109.8 ?
    H3I1 C3I H3I2 . . 108.3 ?
    C5I C4I C3I . . 111.2(19) ?
    C5I C4I H4I1 . . 109.4 ?
    C3I C4I H4I1 . . 109.4 ?
    C5I C4I H4I2 . . 109.4 ?
    C3I C4I H4I2 . . 109.4 ?
    H4I1 C4I H4I2 . . 108.0 ?
    C4I C5I C6I . . 114.5(19) ?
    C4I C5I H5I1 . . 108.6 ?
    C6I C5I H5I1 . . 108.6 ?
    C4I C5I H5I2 . . 108.6 ?
    C6I C5I H5I2 . . 108.6 ?
    H5I1 C5I H5I2 . . 107.6 ?
    C7I C6I C5I . . 112.3(19) ?
    C7I C6I H6I1 . . 109.2 ?
    C5I C6I H6I1 . . 109.2 ?
    C7I C6I H6I2 . . 109.2 ?
    C5I C6I H6I2 . . 109.2 ?
    H6I1 C6I H6I2 . . 107.9 ?
    C6I C7I C8I . . 111.5(19) ?
    C6I C7I H7I1 . . 109.3 ?
    C8I C7I H7I1 . . 109.3 ?
    C6I C7I H7I2 . . 109.3 ?
    C8I C7I H7I2 . . 109.3 ?
    H7I1 C7I H7I2 . . 108.0 ?
    C9I C8I C7I . . 114.6(19) ?
    C9I C8I H8I1 . . 108.6 ?
    C7I C8I H8I1 . . 108.6 ?
    C9I C8I H8I2 . . 108.6 ?
    C7I C8I H8I2 . . 108.6 ?
    H8I1 C8I H8I2 . . 107.6 ?
    C10I C9I C8I . . 115.(2) ?
    C10I C9I H9I1 . . 108.6 ?
    C8I C9I H9I1 . . 108.6 ?
    C10I C9I H9I2 . . 108.6 ?
    C8I C9I H9I2 . . 108.6 ?
    H9I1 C9I H9I2 . . 107.6 ?
    C9I C10I C11I . . 115.(2) ?
    C9I C10I H10Q . . 108.5 ?
    C11I C10I H10Q . . 108.5 ?
    C9I C10I H10R . . 108.5 ?
    C11I C10I H10R . . 108.5 ?
    H10Q C10I H10R . . 107.5 ?
    C12I C11I C10I . . 113.(2) ?
    C12I C11I H11Q . . 108.9 ?
    C10I C11I H11Q . . 108.9 ?
    C12I C11I H11R . . 108.9 ?
    C10I C11I H11R . . 108.9 ?
    H11Q C11I H11R . . 107.7 ?
    C11I C12I H22F . . 109.5 ?
    C11I C12I H22D . . 109.5 ?
    H22F C12I H22D . . 109.5 ?
    C11I C12I H22E . . 109.5 ?
    H22F C12I H22E . . 109.5 ?
    H22D C12I H22E . . 109.5 ?
    C2J C1J S10 . . 114.2(12) ?
    C2J C1J H1J1 . . 108.7 ?
    S10 C1J H1J1 . . 108.7 ?
    C2J C1J H1J2 . . 108.7 ?
    S10 C1J H1J2 . . 108.7 ?
    H1J1 C1J H1J2 . . 107.6 ?
    C1J C2J C3J . . 111.6(15) ?
    C1J C2J H2J1 . . 109.3 ?
    C3J C2J H2J1 . . 109.3 ?
    C1J C2J H2J2 . . 109.3 ?
    C3J C2J H2J2 . . 109.3 ?
    H2J1 C2J H2J2 . . 108.0 ?
    C4J C3J C2J . . 114.3(15) ?
    C4J C3J H3J1 . . 108.7 ?
    C2J C3J H3J1 . . 108.7 ?
    C4J C3J H3J2 . . 108.7 ?
    C2J C3J H3J2 . . 108.7 ?
    H3J1 C3J H3J2 . . 107.6 ?
    C5J C4J C3J . . 115.4(16) ?
    C5J C4J H4J1 . . 108.4 ?
    C3J C4J H4J1 . . 108.4 ?
    C5J C4J H4J2 . . 108.4 ?
    C3J C4J H4J2 . . 108.4 ?
    H4J1 C4J H4J2 . . 107.5 ?
    C6J C5J C4J . . 113.3(17) ?
    C6J C5J H5J1 . . 108.9 ?
    C4J C5J H5J1 . . 108.9 ?
    C6J C5J H5J2 . . 108.9 ?
    C4J C5J H5J2 . . 108.9 ?
    H5J1 C5J H5J2 . . 107.7 ?
    C5J C6J C7J . . 117.8(18) ?
    C5J C6J H6J1 . . 107.9 ?
    C7J C6J H6J1 . . 107.9 ?
    C5J C6J H6J2 . . 107.9 ?
    C7J C6J H6J2 . . 107.9 ?
    H6J1 C6J H6J2 . . 107.2 ?
    C8J C7J C6J . . 120.9(19) ?
    C8J C7J H7J1 . . 107.1 ?
    C6J C7J H7J1 . . 107.1 ?
    C8J C7J H7J2 . . 107.1 ?
    C6J C7J H7J2 . . 107.1 ?
    H7J1 C7J H7J2 . . 106.8 ?
    C9J C8J C7J . . 124.(2) ?
    C9J C8J H8J1 . . 106.4 ?
    C7J C8J H8J1 . . 106.4 ?
    C9J C8J H8J2 . . 106.4 ?
    C7J C8J H8J2 . . 106.4 ?
    H8J1 C8J H8J2 . . 106.5 ?
    C8J C9J C10J . . 126.(2) ?
    C8J C9J H9J1 . . 105.9 ?
    C10J C9J H9J1 . . 105.9 ?
    C8J C9J H9J2 . . 105.9 ?
    C10J C9J H9J2 . . 105.9 ?
    H9J1 C9J H9J2 . . 106.2 ?
    C11J C10J C9J . . 123.(2) ?
    C11J C10J H10S . . 106.6 ?
    C9J C10J H10S . . 106.6 ?
    C11J C10J H10T . . 106.6 ?
    C9J C10J H10T . . 106.6 ?
    H10S C10J H10T . . 106.5 ?
    C10J C11J C12J . . 124.(2) ?
    C10J C11J H11S . . 106.4 ?
    C12J C11J H11S . . 106.4 ?
    C10J C11J H11T . . 106.4 ?
    C12J C11J H11T . . 106.4 ?
    H11S C11J H11T . . 106.5 ?
    C11J C12J H22I . . 109.5 ?
    C11J C12J H22G . . 109.5 ?
    H22I C12J H22G . . 109.5 ?
    C11J C12J H22H . . 109.5 ?
    H22I C12J H22H . . 109.5 ?
    H22G C12J H22H . . 109.5 ?
    C2K C1K S11 . . 110.1(11) ?
    C2K C1K H1K1 . . 109.6 ?
    S11 C1K H1K1 . . 109.6 ?
    C2K C1K H1K2 . . 109.6 ?
    S11 C1K H1K2 . . 109.6 ?
    H1K1 C1K H1K2 . . 108.1 ?
    C1K C2K C3K . . 113.3(14) ?
    C1K C2K H2K1 . . 108.9 ?
    C3K C2K H2K1 . . 108.9 ?
    C1K C2K H2K2 . . 108.9 ?
    C3K C2K H2K2 . . 108.9 ?
    H2K1 C2K H2K2 . . 107.7 ?
    C4K C3K C2K . . 113.4(14) ?
    C4K C3K H3K1 . . 108.9 ?
    C2K C3K H3K1 . . 108.9 ?
    C4K C3K H3K2 . . 108.9 ?
    C2K C3K H3K2 . . 108.9 ?
    H3K1 C3K H3K2 . . 107.7 ?
    C3K C4K C5K . . 112.7(14) ?
    C3K C4K H4K1 . . 109.0 ?
    C5K C4K H4K1 . . 109.0 ?
    C3K C4K H4K2 . . 109.0 ?
    C5K C4K H4K2 . . 109.0 ?
    H4K1 C4K H4K2 . . 107.8 ?
    C6K C5K C4K . . 113.0(14) ?
    C6K C5K H5K1 . . 109.0 ?
    C4K C5K H5K1 . . 109.0 ?
    C6K C5K H5K2 . . 109.0 ?
    C4K C5K H5K2 . . 109.0 ?
    H5K1 C5K H5K2 . . 107.8 ?
    C7K C6K C5K . . 113.5(15) ?
    C7K C6K H6K1 . . 108.9 ?
    C5K C6K H6K1 . . 108.9 ?
    C7K C6K H6K2 . . 108.9 ?
    C5K C6K H6K2 . . 108.9 ?
    H6K1 C6K H6K2 . . 107.7 ?
    C8K C7K C6K . . 114.3(15) ?
    C8K C7K H7K1 . . 108.7 ?
    C6K C7K H7K1 . . 108.7 ?
    C8K C7K H7K2 . . 108.7 ?
    C6K C7K H7K2 . . 108.7 ?
    H7K1 C7K H7K2 . . 107.6 ?
    C7K C8K C9K . . 112.9(15) ?
    C7K C8K H8K1 . . 109.0 ?
    C9K C8K H8K1 . . 109.0 ?
    C7K C8K H8K2 . . 109.0 ?
    C9K C8K H8K2 . . 109.0 ?
    H8K1 C8K H8K2 . . 107.8 ?
    C10K C9K C8K . . 111.5(16) ?
    C10K C9K H9K1 . . 109.3 ?
    C8K C9K H9K1 . . 109.3 ?
    C10K C9K H9K2 . . 109.3 ?
    C8K C9K H9K2 . . 109.3 ?
    H9K1 C9K H9K2 . . 108.0 ?
    C9K C10K C11K . . 114.4(16) ?
    C9K C10K H10U . . 108.7 ?
    C11K C10K H10U . . 108.7 ?
    C9K C10K H10V . . 108.7 ?
    C11K C10K H10V . . 108.7 ?
    H10U C10K H10V . . 107.6 ?
    C10K C11K C12K . . 114.1(17) ?
    C10K C11K H11U . . 108.7 ?
    C12K C11K H11U . . 108.7 ?
    C10K C11K H11V . . 108.7 ?
    C12K C11K H11V . . 108.7 ?
    H11U C11K H11V . . 107.6 ?
    C11K C12K H22J . . 109.5 ?
    C11K C12K H22K . . 109.5 ?
    H22J C12K H22K . . 109.5 ?
    C11K C12K H22L . . 109.5 ?
    H22J C12K H22L . . 109.5 ?
    H22K C12K H22L . . 109.5 ?
    C2L C1L S12 . . 110.2(12) ?
    C2L C1L H1L1 . . 109.6 ?
    S12 C1L H1L1 . . 109.6 ?
    C2L C1L H1L2 . . 109.6 ?
    S12 C1L H1L2 . . 109.6 ?
    H1L1 C1L H1L2 . . 108.1 ?
    C3L C2L C1L . . 115.6(15) ?
    C3L C2L H2L1 . . 108.4 ?
    C1L C2L H2L1 . . 108.4 ?
    C3L C2L H2L2 . . 108.4 ?
    C1L C2L H2L2 . . 108.4 ?
    H2L1 C2L H2L2 . . 107.5 ?
    C2L C3L C4L . . 113.5(15) ?
    C2L C3L H3L1 . . 108.9 ?
    C4L C3L H3L1 . . 108.9 ?
    C2L C3L H3L2 . . 108.9 ?
    C4L C3L H3L2 . . 108.9 ?
    H3L1 C3L H3L2 . . 107.7 ?
    C3L C4L C5L . . 113.9(15) ?
    C3L C4L H4L1 . . 108.8 ?
    C5L C4L H4L1 . . 108.8 ?
    C3L C4L H4L2 . . 108.8 ?
    C5L C4L H4L2 . . 108.8 ?
    H4L1 C4L H4L2 . . 107.7 ?
    C6L C5L C4L . . 115.5(15) ?
    C6L C5L H5L1 . . 108.4 ?
    C4L C5L H5L1 . . 108.4 ?
    C6L C5L H5L2 . . 108.4 ?
    C4L C5L H5L2 . . 108.4 ?
    H5L1 C5L H5L2 . . 107.5 ?
    C7L C6L C5L . . 115.9(15) ?
    C7L C6L H6L1 . . 108.3 ?
    C5L C6L H6L1 . . 108.3 ?
    C7L C6L H6L2 . . 108.3 ?
    C5L C6L H6L2 . . 108.3 ?
    H6L1 C6L H6L2 . . 107.4 ?
    C8L C7L C6L . . 117.1(16) ?
    C8L C7L H7L1 . . 108.0 ?
    C6L C7L H7L1 . . 108.0 ?
    C8L C7L H7L2 . . 108.0 ?
    C6L C7L H7L2 . . 108.0 ?
    H7L1 C7L H7L2 . . 107.3 ?
    C7L C8L C9L . . 115.9(16) ?
    C7L C8L H8L1 . . 108.3 ?
    C9L C8L H8L1 . . 108.3 ?
    C7L C8L H8L2 . . 108.3 ?
    C9L C8L H8L2 . . 108.3 ?
    H8L1 C8L H8L2 . . 107.4 ?
    C8L C9L C10L . . 117.9(16) ?
    C8L C9L H9L1 . . 107.8 ?
    C10L C9L H9L1 . . 107.8 ?
    C8L C9L H9L2 . . 107.8 ?
    C10L C9L H9L2 . . 107.8 ?
    H9L1 C9L H9L2 . . 107.2 ?
    C11L C10L C9L . . 116.2(17) ?
    C11L C10L H10W . . 108.2 ?
    C9L C10L H10W . . 108.2 ?
    C11L C10L H10$ . . 108.2 ?
    C9L C10L H10$ . . 108.2 ?
    H10W C10L H10$ . . 107.4 ?
    C10L C11L C12L . . 117.6(18) ?
    C10L C11L H11W . . 107.9 ?
    C12L C11L H11W . . 107.9 ?
    C10L C11L H11$ . . 107.9 ?
    C12L C11L H11$ . . 107.9 ?
    H11W C11L H11$ . . 107.2 ?
    C11L C12L H22O . . 109.5 ?
    C11L C12L H22M . . 109.5 ?
    H22O C12L H22M . . 109.5 ?
    C11L C12L H22N . . 109.5 ?
    H22O C12L H22N . . 109.5 ?
    H22M C12L H22N . . 109.5 ?
    F3B Sb1 F2B . . 97.1(16) ?
    F4A Sb1 F1A . . 92.7(6) ?
    F4A Sb1 F3A . . 90.8(6) ?
    F1A Sb1 F3A . . 176.1(7) ?
    F3B Sb1 F6 . . 78.3(18) ?
    F2B Sb1 F6 . . 91.3(17) ?
    F4A Sb1 F6 . . 86.1(7) ?
    F1A Sb1 F6 . . 89.5(8) ?
    F3A Sb1 F6 . . 92.7(7) ?
    F3B Sb1 F5 . . 103.3(17) ?
    F2B Sb1 F5 . . 87.4(17) ?
    F4A Sb1 F5 . . 93.7(6) ?
    F1A Sb1 F5 . . 88.6(7) ?
    F3A Sb1 F5 . . 89.3(7) ?
    F6 Sb1 F5 . . 178.0(6) ?
    F3B Sb1 F1B . . 175.(2) ?
    F2B Sb1 F1B . . 88.3(13) ?
    F6 Sb1 F1B . . 102.3(17) ?
    F5 Sb1 F1B . . 76.1(16) ?
    F4A Sb1 F2A . . 178.3(7) ?
    F1A Sb1 F2A . . 88.7(6) ?
    F3A Sb1 F2A . . 87.8(6) ?
    F6 Sb1 F2A . . 94.9(7) ?
    F5 Sb1 F2A . . 85.3(6) ?
    F3B Sb1 F4B . . 90.8(14) ?
    F2B Sb1 F4B . . 172.1(17) ?
    F6 Sb1 F4B . . 90.8(16) ?
    F5 Sb1 F4B . . 90.3(16) ?
    F1B Sb1 F4B . . 83.9(13) ?

_shelx_res_file                         
;
141111Pt6DDT12Ag_0m.res created by SHELXL-2014/7

TITL 141111Pt6DDT12Ag_0m in P-1
CELL 0.71073  15.60030  16.62180  31.95390  92.6717  93.2134  95.2529
ZERR    2.00   0.00120   0.00130   0.00250   0.0011   0.0011   0.0010
LATT 1
SFAC C  H  F  S  Ag Sb Pt
UNIT 288  600  12  24  2  2  12
L.S. 35
ACTA
BOND $h
FMAP 2
PLAN 100
SADI F1A F2A F2A F3A F3A F4A F4A F1A
SADI F1B F2B F2B F3B F3B F4B F4B F1B
SIZE 0.25 0.14 0.14
DFIX 1.54 0.015 C2A C3A C3A C4A C4A C5A C5A C6A C6A C7A
DFIX 2.54 0.015 C2A C4A C3A C5A C4A C6A C5A C7A
SIMU 0.005 $C
SIMU 0.02 $F
ISOR 0.005 $C
ISOR 0.02 $F
TEMP -183
WGHT    0.105900    0.149930
FVAR       0.02129   0.73558
MOLE 1
PT1   7    0.239364    0.930046    0.968024    11.00000    0.02593    0.01375 =
         0.02824    0.00378    0.00072    0.00096
PT2   7    0.128422    0.792536    0.912805    11.00000    0.02041    0.01430 =
         0.02260    0.00402    0.00115    0.00124
PT3   7    0.149931    0.615745    0.921973    11.00000    0.01799    0.01333 =
         0.01752    0.00277    0.00050    0.00038
PT4   7    0.289927    0.578398    0.988210    11.00000    0.01909    0.01347 =
         0.01687    0.00236    0.00144    0.00069
PT5   7    0.397938    0.716308    1.044125    11.00000    0.02300    0.01419 =
         0.01594    0.00300    0.00083    0.00140
PT6   7    0.377311    0.893308    1.036515    11.00000    0.02838    0.01169 =
         0.02225    0.00394    0.00183    0.00023
S1    4    0.093097    0.892868    0.960159    11.00000    0.02217    0.02126 =
         0.03788   -0.00489    0.00087    0.00478
S2    4    0.234583    0.892161    0.897336    11.00000    0.02460    0.01376 =
         0.02918    0.00666   -0.00101    0.00040
S3    4    0.153846    0.692295    0.863002    11.00000    0.02349    0.01927 =
         0.01892    0.00569    0.00348    0.00321
S4    4    0.031468    0.689235    0.933875    11.00000    0.02329    0.02141 =
         0.02252    0.00776    0.00212    0.00396
S5    4    0.143153    0.538642    0.980694    11.00000    0.02159    0.01561 =
         0.01676    0.00616    0.00219    0.00108
S6    4    0.280050    0.560028    0.915707    11.00000    0.02154    0.02033 =
         0.01245    0.00026    0.00361    0.00102
S7    4    0.435508    0.621797    0.994409    11.00000    0.01807    0.01396 =
         0.01977    0.00174    0.00362    0.00397
S8    4    0.296524    0.613155    1.059265    11.00000    0.02285    0.01750 =
         0.01521    0.00216    0.00404   -0.00031
S9    4    0.366805    0.814154    1.094243    11.00000    0.04730    0.01867 =
         0.01893    0.00165    0.00489    0.00318
S10   4    0.497003    0.821461    1.027129    11.00000    0.02471    0.01540 =
         0.02513    0.00392   -0.00249   -0.00069
S11   4    0.386730    0.967491    0.977532    11.00000    0.02673    0.01486 =
         0.02570    0.00646    0.00017   -0.00048
S12   4    0.246785    0.948859    1.040123    11.00000    0.03430    0.01225 =
         0.03396   -0.00075    0.00171    0.00037
AG1   5    0.262670    0.752137    0.978347    11.00000    0.01873    0.01705 =
         0.01962    0.00451    0.00216    0.00423
C1A   1    0.056325    0.847351    1.006627    11.00000    0.08063    0.08039 =
         0.07952    0.00132    0.00770    0.00817
AFIX  23
H1A1  2    0.012445    0.801897    0.998005    11.00000   -1.20000
H1A2  2    0.105594    0.824285    1.021022    11.00000   -1.20000
AFIX   0
C2A   1    0.019177    0.901175    1.036870    11.00000    0.08687    0.08737 =
         0.08643    0.00195    0.00700    0.00853
AFIX  23
H2A1  2   -0.038227    0.915886    1.026816    11.00000   -1.20000
H2A2  2    0.057942    0.950692    1.044844    11.00000   -1.20000
AFIX   0
C3A   1    0.013692    0.840694    1.073053    11.00000    0.09456    0.09476 =
         0.09608    0.00236    0.00598    0.00809
AFIX  23
H3A1  2   -0.000357    0.784912    1.060812    11.00000   -1.20000
H3A2  2    0.070431    0.843036    1.088799    11.00000   -1.20000
AFIX   0
C4A   1   -0.052412    0.860238    1.102005    11.00000    0.09589    0.09603 =
         0.09933    0.00656    0.00421    0.00738
AFIX  23
H4A1  2   -0.108768    0.858638    1.085971    11.00000   -1.20000
H4A2  2   -0.037916    0.916042    1.114140    11.00000   -1.20000
AFIX   0
C5A   1   -0.060819    0.802122    1.137900    11.00000    0.09153    0.09103 =
         0.09444    0.01121    0.00184    0.00641
AFIX  23
H5A1  2   -0.101677    0.754501    1.128994    11.00000   -1.20000
H5A2  2   -0.004093    0.783038    1.145714    11.00000   -1.20000
AFIX   0
C6A   1   -0.094008    0.848366    1.175433    11.00000    0.08674    0.08613 =
         0.09085    0.00858   -0.00179    0.00767
AFIX  23
H6A1  2   -0.047166    0.888056    1.187784    11.00000   -1.20000
H6A2  2   -0.142078    0.878846    1.165373    11.00000   -1.20000
AFIX   0
C7A   1   -0.124574    0.794485    1.208727    11.00000    0.08174    0.08086 =
         0.08542    0.00740   -0.00275    0.00783
AFIX  23
H7A1  2   -0.172640    0.755232    1.197232    11.00000   -1.20000
H7A2  2   -0.077127    0.764095    1.219617    11.00000   -1.20000
AFIX   0
C8A   1   -0.152957    0.845349    1.241529    11.00000    0.07893    0.07802 =
         0.08206    0.00671   -0.00447    0.00879
AFIX  23
H8A1  2   -0.193771    0.881331    1.229272    11.00000   -1.20000
H8A2  2   -0.102732    0.879832    1.254800    11.00000   -1.20000
AFIX   0
C9A   1   -0.194353    0.799708    1.273056    11.00000    0.07880    0.07791 =
         0.08138    0.00572   -0.00371    0.00939
AFIX  23
H9A1  2   -0.151474    0.766283    1.285783    11.00000   -1.20000
H9A2  2   -0.240737    0.762006    1.258685    11.00000   -1.20000
AFIX   0
C10A  1   -0.231483    0.842506    1.306707    11.00000    0.07968    0.07962 =
         0.08142    0.00696   -0.00313    0.00823
AFIX  23
H10A  2   -0.184373    0.880610    1.320163    11.00000   -1.20000
H10B  2   -0.273329    0.876081    1.293250    11.00000   -1.20000
AFIX   0
C11A  1   -0.273400    0.805579    1.339465    11.00000    0.08115    0.08167 =
         0.08366    0.00538   -0.00303    0.00717
AFIX  23
H11A  2   -0.230966    0.773208    1.353384    11.00000   -1.20000
H11B  2   -0.319411    0.766342    1.325960    11.00000   -1.20000
AFIX   0
C12A  1   -0.314331    0.849931    1.374249    11.00000    0.08385    0.08248 =
         0.08917    0.01161   -0.00760    0.00355
AFIX 137
H12A  2   -0.272913    0.893277    1.386996    11.00000   -1.50000
H12B  2   -0.331145    0.812068    1.395604    11.00000   -1.50000
H12C  2   -0.365524    0.873258    1.362742    11.00000   -1.50000
AFIX   0
C1B   1    0.177097    0.965448    0.867630    11.00000    0.03579    0.03175 =
         0.03399    0.00631   -0.00019    0.00133
AFIX  23
H1B1  2    0.120145    0.970305    0.879213    11.00000   -1.20000
H1B2  2    0.210394    1.019225    0.870979    11.00000   -1.20000
AFIX   0
C2B   1    0.164524    0.940034    0.821612    11.00000    0.03705    0.03403 =
         0.03556    0.00699   -0.00032    0.00248
AFIX  23
H2B1  2    0.124689    0.975401    0.808046    11.00000   -1.20000
H2B2  2    0.136340    0.884052    0.818836    11.00000   -1.20000
AFIX   0
C3B   1    0.247187    0.943144    0.797791    11.00000    0.03920    0.03574 =
         0.03742    0.00649   -0.00027    0.00199
AFIX  23
H3B1  2    0.277439    0.998139    0.802280    11.00000   -1.20000
H3B2  2    0.285296    0.904902    0.810165    11.00000   -1.20000
AFIX   0
C4B   1    0.234880    0.923438    0.751721    11.00000    0.04054    0.03737 =
         0.03894    0.00452    0.00017    0.00113
AFIX  23
H4B1  2    0.194373    0.959685    0.739448    11.00000   -1.20000
H4B2  2    0.207810    0.867255    0.747112    11.00000   -1.20000
AFIX   0
C5B   1    0.317780    0.931430    0.728403    11.00000    0.04145    0.03811 =
         0.04128    0.00442   -0.00067    0.00317
AFIX  23
H5B1  2    0.345427    0.987333    0.733416    11.00000   -1.20000
H5B2  2    0.357887    0.894415    0.740298    11.00000   -1.20000
AFIX   0
C6B   1    0.304898    0.912986    0.681957    11.00000    0.04279    0.04025 =
         0.04211    0.00383   -0.00033    0.00507
AFIX  23
H6B1  2    0.264216    0.949227    0.669826    11.00000   -1.20000
H6B2  2    0.279019    0.856549    0.676620    11.00000   -1.20000
AFIX   0
C7B   1    0.391579    0.924180    0.659943    11.00000    0.04349    0.04119 =
         0.04248    0.00459    0.00003    0.00635
AFIX  23
H7B1  2    0.417000    0.980770    0.665248    11.00000   -1.20000
H7B2  2    0.432332    0.888493    0.672516    11.00000   -1.20000
AFIX   0
C8B   1    0.381157    0.905053    0.612689    11.00000    0.04603    0.04527 =
         0.04377    0.00437   -0.00003    0.00506
AFIX  23
H8B1  2    0.357188    0.848016    0.607427    11.00000   -1.20000
H8B2  2    0.339128    0.939672    0.600253    11.00000   -1.20000
AFIX   0
C9B   1    0.463650    0.917805    0.591246    11.00000    0.04848    0.04788 =
         0.04618    0.00409   -0.00037    0.00607
AFIX  23
H9B1  2    0.506870    0.886528    0.605355    11.00000   -1.20000
H9B2  2    0.485172    0.975750    0.594949    11.00000   -1.20000
AFIX   0
C10B  1    0.457399    0.893610    0.544574    11.00000    0.05289    0.05121 =
         0.04952    0.00464    0.00073    0.00627
AFIX  23
H10C  2    0.434484    0.836048    0.540659    11.00000   -1.20000
H10D  2    0.415727    0.926116    0.530178    11.00000   -1.20000
AFIX   0
C11B  1    0.542471    0.904965    0.524037    11.00000    0.05593    0.05458 =
         0.05349    0.00320    0.00103    0.00738
AFIX  23
H11C  2    0.583252    0.871872    0.538651    11.00000   -1.20000
H11D  2    0.565528    0.962296    0.529115    11.00000   -1.20000
AFIX   0
C12B  1    0.543034    0.884076    0.477083    11.00000    0.06799    0.06218 =
         0.05919    0.00302    0.00751    0.01076
AFIX 137
H12D  2    0.513481    0.829952    0.470644    11.00000   -1.50000
H12E  2    0.602739    0.885076    0.468933    11.00000   -1.50000
H12F  2    0.513243    0.923775    0.461494    11.00000   -1.50000
AFIX   0
C1C   1    0.261756    0.707923    0.842463    11.00000    0.02942    0.02753 =
         0.02997    0.00303    0.00278    0.00261
AFIX  23
H1C1  2    0.285508    0.764981    0.847910    11.00000   -1.20000
H1C2  2    0.301314    0.672919    0.856519    11.00000   -1.20000
AFIX   0
C2C   1    0.253460    0.686940    0.795608    11.00000    0.03153    0.03113 =
         0.03180    0.00202    0.00189    0.00245
AFIX  23
H2C1  2    0.212298    0.721164    0.782131    11.00000   -1.20000
H2C2  2    0.229676    0.629783    0.790669    11.00000   -1.20000
AFIX   0
C3C   1    0.339979    0.699245    0.775156    11.00000    0.03092    0.03092 =
         0.03222    0.00278    0.00177    0.00323
AFIX  23
H3C1  2    0.365140    0.755647    0.781505    11.00000   -1.20000
H3C2  2    0.380074    0.662952    0.787730    11.00000   -1.20000
AFIX   0
C4C   1    0.332691    0.683141    0.729085    11.00000    0.03380    0.03446 =
         0.03429    0.00011    0.00140    0.00263
AFIX  23
H4C1  2    0.292707    0.719571    0.716544    11.00000   -1.20000
H4C2  2    0.307238    0.626820    0.722774    11.00000   -1.20000
AFIX   0
C5C   1    0.419066    0.694992    0.708363    11.00000    0.03517    0.03603 =
         0.03572   -0.00018    0.00133    0.00316
AFIX  23
H5C1  2    0.444894    0.751092    0.715010    11.00000   -1.20000
H5C2  2    0.458777    0.658027    0.720639    11.00000   -1.20000
AFIX   0
C6C   1    0.411721    0.679922    0.662082    11.00000    0.03749    0.03865 =
         0.03640    0.00083    0.00066    0.00335
AFIX  23
H6C1  2    0.371602    0.716498    0.649786    11.00000   -1.20000
H6C2  2    0.386550    0.623626    0.655400    11.00000   -1.20000
AFIX   0
C7C   1    0.497539    0.692665    0.641766    11.00000    0.03790    0.03938 =
         0.03566    0.00247    0.00041    0.00487
AFIX  23
H7C1  2    0.537937    0.657365    0.654957    11.00000   -1.20000
H7C2  2    0.521683    0.749380    0.648092    11.00000   -1.20000
AFIX   0
C8C   1    0.494006    0.675593    0.593933    11.00000    0.03956    0.04110 =
         0.03819    0.00171    0.00156    0.00485
AFIX  23
H8C1  2    0.470940    0.618654    0.587346    11.00000   -1.20000
H8C2  2    0.453679    0.710624    0.580466    11.00000   -1.20000
AFIX   0
C9C   1    0.581386    0.690134    0.575432    11.00000    0.04272    0.04429 =
         0.04100    0.00231    0.00231    0.00484
AFIX  23
H9C1  2    0.620991    0.653092    0.587725    11.00000   -1.20000
H9C2  2    0.605871    0.746290    0.583098    11.00000   -1.20000
AFIX   0
C10C  1    0.575526    0.676565    0.526707    11.00000    0.04627    0.04646 =
         0.04490    0.00321    0.00315    0.00398
AFIX  23
H10E  2    0.553592    0.619705    0.519046    11.00000   -1.20000
H10F  2    0.533988    0.711859    0.514447    11.00000   -1.20000
AFIX   0
C11C  1    0.662151    0.694761    0.508379    11.00000    0.04881    0.04912 =
         0.04799    0.00310    0.00403    0.00337
AFIX  23
H11E  2    0.703053    0.658006    0.519821    11.00000   -1.20000
H11F  2    0.685121    0.750951    0.516986    11.00000   -1.20000
AFIX   0
C12C  1    0.655990    0.684611    0.460304    11.00000    0.05795    0.05921 =
         0.05287    0.00549    0.01080    0.00067
AFIX 137
H12G  2    0.640346    0.627554    0.451699    11.00000   -1.50000
H12H  2    0.711830    0.702470    0.449564    11.00000   -1.50000
H12I  2    0.611860    0.717325    0.448941    11.00000   -1.50000
AFIX   0
C1D   1   -0.047464    0.664431    0.889386    11.00000    0.02118    0.02160 =
         0.02018    0.00369    0.00087    0.00139
AFIX  23
H1D1  2   -0.018174    0.640640    0.865738    11.00000   -1.20000
H1D2  2   -0.092374    0.623138    0.897595    11.00000   -1.20000
AFIX   0
C2D   1   -0.088952    0.735011    0.875221    11.00000    0.02298    0.02602 =
         0.02469    0.00367   -0.00016    0.00351
AFIX  23
H2D1  2   -0.044727    0.775796    0.865917    11.00000   -1.20000
H2D2  2   -0.117479    0.759851    0.898834    11.00000   -1.20000
AFIX   0
C3D   1   -0.156126    0.709871    0.838772    11.00000    0.02553    0.02759 =
         0.02696    0.00386   -0.00039    0.00456
AFIX  23
H3D1  2   -0.202472    0.672898    0.849351    11.00000   -1.20000
H3D2  2   -0.182409    0.758778    0.829833    11.00000   -1.20000
AFIX   0
C4D   1   -0.121770    0.668103    0.800088    11.00000    0.02766    0.02800 =
         0.02820    0.00250   -0.00027    0.00228
AFIX  23
H4D1  2   -0.094033    0.619959    0.809028    11.00000   -1.20000
H4D2  2   -0.171194    0.648965    0.780221    11.00000   -1.20000
AFIX   0
C5D   1   -0.057499    0.721145    0.777234    11.00000    0.03021    0.02885 =
         0.02955    0.00151    0.00039    0.00126
AFIX  23
H5D1  2   -0.085997    0.767901    0.766960    11.00000   -1.20000
H5D2  2   -0.009271    0.742423    0.797347    11.00000   -1.20000
AFIX   0
C6D   1   -0.021884    0.678486    0.741100    11.00000    0.03054    0.02849 =
         0.02974    0.00172   -0.00036    0.00185
AFIX  23
H6D1  2   -0.069855    0.645394    0.725079    11.00000   -1.20000
H6D2  2    0.018598    0.640974    0.752159    11.00000   -1.20000
AFIX   0
C7D   1    0.025056    0.733061    0.710966    11.00000    0.03377    0.03259 =
         0.03280    0.00055    0.00009    0.00127
AFIX  23
H7D1  2   -0.016034    0.768848    0.698768    11.00000   -1.20000
H7D2  2    0.071561    0.767882    0.727087    11.00000   -1.20000
AFIX   0
C8D   1    0.064039    0.688107    0.675555    11.00000    0.03626    0.03562 =
         0.03631    0.00129    0.00160    0.00290
AFIX  23
H8D1  2    0.019108    0.648712    0.661294    11.00000   -1.20000
H8D2  2    0.110271    0.657370    0.687431    11.00000   -1.20000
AFIX   0
C9D   1    0.101715    0.744509    0.643080    11.00000    0.03897    0.03986 =
         0.03996    0.00168    0.00323    0.00237
AFIX  23
H9D1  2    0.054488    0.771405    0.629253    11.00000   -1.20000
H9D2  2    0.142695    0.787053    0.657706    11.00000   -1.20000
AFIX   0
C10D  1    0.147864    0.700185    0.609902    11.00000    0.04202    0.04413 =
         0.04375    0.00231    0.00491    0.00275
AFIX  23
H10G  2    0.109199    0.653401    0.597697    11.00000   -1.20000
H10H  2    0.199465    0.679095    0.623257    11.00000   -1.20000
AFIX   0
C11D  1    0.176245    0.755639    0.573910    11.00000    0.04435    0.04720 =
         0.04566    0.00058    0.00544    0.00274
AFIX  23
H11G  2    0.124068    0.770018    0.557953    11.00000   -1.20000
H11H  2    0.207220    0.806381    0.586567    11.00000   -1.20000
AFIX   0
C12D  1    0.231875    0.718185    0.544769    11.00000    0.04868    0.05342 =
         0.04889   -0.00153    0.00715   -0.00025
AFIX 137
H12J  2    0.277795    0.694252    0.560689    11.00000   -1.50000
H12K  2    0.257474    0.759357    0.527035    11.00000   -1.50000
H12L  2    0.197595    0.675874    0.527076    11.00000   -1.50000
AFIX   0
C1E   1    0.088864    0.592420    1.021978    11.00000    0.01961    0.02202 =
         0.02524    0.00228    0.00039    0.00185
AFIX  23
H1E1  2    0.123227    0.644322    1.030286    11.00000   -1.20000
H1E2  2    0.031581    0.604893    1.010511    11.00000   -1.20000
AFIX   0
C2E   1    0.077629    0.543999    1.059944    11.00000    0.01954    0.02104 =
         0.02265    0.00441    0.00014    0.00043
AFIX  23
H2E1  2    0.133658    0.525359    1.069407    11.00000   -1.20000
H2E2  2    0.036625    0.495677    1.052679    11.00000   -1.20000
AFIX   0
C3E   1    0.043837    0.594457    1.095276    11.00000    0.02093    0.01936 =
         0.02147    0.00310    0.00036   -0.00007
AFIX  23
H3E1  2   -0.010256    0.615964    1.085146    11.00000   -1.20000
H3E2  2    0.086571    0.640985    1.103621    11.00000   -1.20000
AFIX   0
C4E   1    0.026620    0.544255    1.133582    11.00000    0.02129    0.02067 =
         0.02158    0.00256    0.00216   -0.00285
AFIX  23
H4E1  2   -0.014565    0.496769    1.124856    11.00000   -1.20000
H4E2  2    0.081195    0.524024    1.144013    11.00000   -1.20000
AFIX   0
C5E   1   -0.009405    0.591749    1.168734    11.00000    0.02060    0.02095 =
         0.01956    0.00544    0.00347   -0.00246
AFIX  23
H5E1  2   -0.061544    0.615568    1.157815    11.00000   -1.20000
H5E2  2    0.033712    0.636721    1.179058    11.00000   -1.20000
AFIX   0
C6E   1   -0.033482    0.537831    1.206379    11.00000    0.02003    0.01991 =
         0.01919    0.00151    0.00289   -0.00108
AFIX  23
H6E1  2   -0.073506    0.490852    1.195582    11.00000   -1.20000
H6E2  2    0.019481    0.516849    1.218337    11.00000   -1.20000
AFIX   0
C7E   1   -0.074740    0.582544    1.240628    11.00000    0.02187    0.01994 =
         0.01970    0.00221    0.00161    0.00018
AFIX  23
H7E1  2   -0.126447    0.605207    1.228365    11.00000   -1.20000
H7E2  2   -0.033837    0.628462    1.251967    11.00000   -1.20000
AFIX   0
C8E   1   -0.101366    0.530586    1.276792    11.00000    0.02519    0.02244 =
         0.02404    0.00248    0.00178   -0.00063
AFIX  23
H8E1  2   -0.141026    0.483947    1.265231    11.00000   -1.20000
H8E2  2   -0.049320    0.508905    1.289326    11.00000   -1.20000
AFIX   0
C9E   1   -0.144007    0.572927    1.310550    11.00000    0.02987    0.02631 =
         0.02721    0.00248    0.00386    0.00065
AFIX  23
H9E1  2   -0.196231    0.594485    1.298131    11.00000   -1.20000
H9E2  2   -0.104453    0.619556    1.322213    11.00000   -1.20000
AFIX   0
C10E  1   -0.169784    0.520413    1.346107    11.00000    0.03457    0.03142 =
         0.03151    0.00290    0.00475    0.00288
AFIX  23
H10I  2   -0.117983    0.496916    1.357680    11.00000   -1.20000
H10J  2   -0.211294    0.475090    1.334608    11.00000   -1.20000
AFIX   0
C11E  1   -0.210141    0.564442    1.381712    11.00000    0.03936    0.03703 =
         0.03476    0.00173    0.00532    0.00144
AFIX  23
H11I  2   -0.263474    0.586054    1.370638    11.00000   -1.20000
H11J  2   -0.169672    0.610815    1.392883    11.00000   -1.20000
AFIX   0
C12E  1   -0.232034    0.508908    1.417594    11.00000    0.04817    0.04852 =
         0.04117    0.00508    0.00750    0.00191
AFIX 137
H12M  2   -0.273079    0.463517    1.406819    11.00000   -1.50000
H12N  2   -0.257721    0.539664    1.439787    11.00000   -1.50000
H12O  2   -0.179243    0.488177    1.429028    11.00000   -1.50000
AFIX   0
C1F   1    0.257031    0.451144    0.901664    11.00000    0.01777    0.01718 =
         0.01748   -0.00199    0.00364    0.00059
AFIX  23
H1F1  2    0.303897    0.421142    0.913522    11.00000   -1.20000
H1F2  2    0.202339    0.430347    0.913330    11.00000   -1.20000
AFIX   0
C2F   1    0.249850    0.438690    0.853069    11.00000    0.01951    0.01742 =
         0.01935   -0.00172    0.00350    0.00231
AFIX  23
H2F1  2    0.226872    0.382112    0.845383    11.00000   -1.20000
H2F2  2    0.208056    0.474508    0.841530    11.00000   -1.20000
AFIX   0
C3F   1    0.336498    0.456366    0.832575    11.00000    0.02268    0.02148 =
         0.02078   -0.00105    0.00340    0.00361
AFIX  23
H3F1  2    0.357760    0.513937    0.838570    11.00000   -1.20000
H3F2  2    0.379502    0.422997    0.845240    11.00000   -1.20000
AFIX   0
C4F   1    0.328761    0.439163    0.786709    11.00000    0.02686    0.02550 =
         0.02440   -0.00168    0.00320    0.00238
AFIX  23
H4F1  2    0.283986    0.471235    0.774551    11.00000   -1.20000
H4F2  2    0.308314    0.381297    0.781135    11.00000   -1.20000
AFIX   0
C5F   1    0.412893    0.457504    0.763379    11.00000    0.03034    0.03006 =
         0.02793   -0.00093    0.00172    0.00156
AFIX  23
H5F1  2    0.433719    0.515259    0.769059    11.00000   -1.20000
H5F2  2    0.457580    0.424988    0.775235    11.00000   -1.20000
AFIX   0
C6F   1    0.403513    0.440246    0.716402    11.00000    0.03598    0.03492 =
         0.03207   -0.00044    0.00198    0.00290
AFIX  23
H6F1  2    0.361851    0.475374    0.704101    11.00000   -1.20000
H6F2  2    0.379605    0.383351    0.710475    11.00000   -1.20000
AFIX   0
C7F   1    0.488636    0.454201    0.695207    11.00000    0.03852    0.03859 =
         0.03485   -0.00048    0.00285    0.00222
AFIX  23
H7F1  2    0.529688    0.417957    0.707010    11.00000   -1.20000
H7F2  2    0.513332    0.510638    0.701904    11.00000   -1.20000
AFIX   0
C8F   1    0.479661    0.439198    0.647311    11.00000    0.03984    0.04089 =
         0.03770    0.00100    0.00224    0.00203
AFIX  23
H8F1  2    0.456745    0.382338    0.640351    11.00000   -1.20000
H8F2  2    0.437999    0.474635    0.635291    11.00000   -1.20000
AFIX   0
C9F   1    0.566012    0.455903    0.627760    11.00000    0.04084    0.04312 =
         0.03933    0.00188    0.00277    0.00310
AFIX  23
H9F1  2    0.607713    0.421302    0.640490    11.00000   -1.20000
H9F2  2    0.588185    0.512988    0.634623    11.00000   -1.20000
AFIX   0
C10F  1    0.561101    0.440217    0.579324    11.00000    0.04143    0.04475 =
         0.04112    0.00073    0.00403    0.00330
AFIX  23
H10K  2    0.538269    0.383370    0.572263    11.00000   -1.20000
H10L  2    0.520491    0.475612    0.566381    11.00000   -1.20000
AFIX   0
C11F  1    0.649264    0.456199    0.560890    11.00000    0.04070    0.04579 =
         0.04168    0.00210    0.00540    0.00161
AFIX  23
H11K  2    0.670848    0.513672    0.566961    11.00000   -1.20000
H11L  2    0.690473    0.422622    0.574834    11.00000   -1.20000
AFIX   0
C12F  1    0.646284    0.437708    0.513958    11.00000    0.04474    0.05339 =
         0.04775    0.00079    0.01016   -0.00369
AFIX 137
H12P  2    0.622785    0.381476    0.507612    11.00000   -1.50000
H12Q  2    0.704698    0.445666    0.504132    11.00000   -1.50000
H12R  2    0.609439    0.474013    0.499752    11.00000   -1.50000
AFIX   0
C1G   1    0.465469    0.679597    0.949241    11.00000    0.02189    0.01921 =
         0.02103    0.00381   -0.00002   -0.00146
AFIX  23
H1G1  2    0.413321    0.700770    0.936498    11.00000   -1.20000
H1G2  2    0.506584    0.726485    0.959043    11.00000   -1.20000
AFIX   0
C2G   1    0.506458    0.629540    0.915735    11.00000    0.02162    0.02064 =
         0.02243   -0.00001    0.00215   -0.00068
AFIX  23
H2G1  2    0.559443    0.609096    0.928011    11.00000   -1.20000
H2G2  2    0.465849    0.582407    0.905748    11.00000   -1.20000
AFIX   0
C3G   1    0.528448    0.680337    0.879397    11.00000    0.02334    0.02060 =
         0.02244    0.00163    0.00291    0.00041
AFIX  23
H3G1  2    0.566944    0.728374    0.890171    11.00000   -1.20000
H3G2  2    0.474715    0.699871    0.867418    11.00000   -1.20000
AFIX   0
C4G   1    0.572011    0.637663    0.844206    11.00000    0.02471    0.02398 =
         0.02477    0.00066    0.00431    0.00147
AFIX  23
H4G1  2    0.531622    0.592176    0.831922    11.00000   -1.20000
H4G2  2    0.623251    0.614372    0.856555    11.00000   -1.20000
AFIX   0
C5G   1    0.600675    0.691386    0.808627    11.00000    0.02630    0.02674 =
         0.02699    0.00080    0.00357    0.00214
AFIX  23
H5G1  2    0.550659    0.717733    0.797171    11.00000   -1.20000
H5G2  2    0.644947    0.734425    0.820113    11.00000   -1.20000
AFIX   0
C6G   1    0.637160    0.643312    0.773658    11.00000    0.02589    0.02774 =
         0.02800    0.00341    0.00373    0.00283
AFIX  23
H6G1  2    0.590668    0.604736    0.760036    11.00000   -1.20000
H6G2  2    0.682125    0.611463    0.785826    11.00000   -1.20000
AFIX   0
C7G   1    0.675855    0.695579    0.740729    11.00000    0.02781    0.02744 =
         0.02818    0.00343    0.00263    0.00275
AFIX  23
H7G1  2    0.722014    0.734476    0.754382    11.00000   -1.20000
H7G2  2    0.630766    0.727064    0.728372    11.00000   -1.20000
AFIX   0
C8G   1    0.713650    0.646596    0.705365    11.00000    0.02878    0.02856 =
         0.02922    0.00235    0.00265    0.00270
AFIX  23
H8G1  2    0.755865    0.612307    0.717927    11.00000   -1.20000
H8G2  2    0.666650    0.610273    0.690531    11.00000   -1.20000
AFIX   0
C9G   1    0.757375    0.698411    0.673983    11.00000    0.03205    0.03187 =
         0.03074    0.00061    0.00361    0.00229
AFIX  23
H9G1  2    0.801977    0.737452    0.688759    11.00000   -1.20000
H9G2  2    0.714499    0.729476    0.659463    11.00000   -1.20000
AFIX   0
C10G  1    0.799365    0.646125    0.641608    11.00000    0.03384    0.03467 =
         0.03293    0.00198    0.00411    0.00376
AFIX  23
H10M  2    0.754346    0.607066    0.627160    11.00000   -1.20000
H10N  2    0.841522    0.614775    0.656460    11.00000   -1.20000
AFIX   0
C11G  1    0.845896    0.695705    0.608351    11.00000    0.03748    0.03976 =
         0.03528    0.00081    0.00444    0.00374
AFIX  23
H11M  2    0.803560    0.726489    0.593248    11.00000   -1.20000
H11N  2    0.890369    0.735272    0.622832    11.00000   -1.20000
AFIX   0
C12G  1    0.888402    0.644260    0.576684    11.00000    0.04821    0.04700 =
         0.04166    0.00367    0.01268    0.00492
AFIX 137
H12S  2    0.928822    0.611937    0.591423    11.00000   -1.50000
H12T  2    0.919707    0.679364    0.557714    11.00000   -1.50000
H12U  2    0.844183    0.608187    0.560423    11.00000   -1.50000
AFIX   0
C1H   1    0.358397    0.541696    1.085952    11.00000    0.02253    0.02170 =
         0.02572    0.00586    0.00411    0.00204
AFIX  23
H1H1  2    0.326032    0.487435    1.083510    11.00000   -1.20000
H1H2  2    0.413736    0.537996    1.072585    11.00000   -1.20000
AFIX   0
C2H   1    0.375949    0.568544    1.132079    11.00000    0.02495    0.02508 =
         0.02577    0.00628    0.00264    0.00069
AFIX  23
H2H1  2    0.420288    0.536532    1.144690    11.00000   -1.20000
H2H2  2    0.399067    0.626169    1.134343    11.00000   -1.20000
AFIX   0
C3H   1    0.295576    0.558057    1.156290    11.00000    0.02694    0.02698 =
         0.02720    0.00335    0.00273    0.00007
AFIX  23
H3H1  2    0.272056    0.500588    1.153072    11.00000   -1.20000
H3H2  2    0.251913    0.590631    1.143540    11.00000   -1.20000
AFIX   0
C4H   1    0.308135    0.582089    1.202781    11.00000    0.02785    0.02860 =
         0.02897    0.00253    0.00199    0.00104
AFIX  23
H4H1  2    0.352700    0.550580    1.215596    11.00000   -1.20000
H4H2  2    0.329758    0.640039    1.206200    11.00000   -1.20000
AFIX   0
C5H   1    0.226896    0.568551    1.226032    11.00000    0.02942    0.03068 =
         0.03051    0.00227    0.00127    0.00072
AFIX  23
H5H1  2    0.202628    0.511639    1.220598    11.00000   -1.20000
H5H2  2    0.184009    0.603533    1.214720    11.00000   -1.20000
AFIX   0
C6H   1    0.240229    0.585975    1.273126    11.00000    0.03180    0.03115 =
         0.03084    0.00354    0.00093    0.00038
AFIX  23
H6H1  2    0.263819    0.643045    1.278714    11.00000   -1.20000
H6H2  2    0.283256    0.551257    1.284558    11.00000   -1.20000
AFIX   0
C7H   1    0.155543    0.570833    1.296273    11.00000    0.03284    0.03197 =
         0.03048    0.00395    0.00193    0.00112
AFIX  23
H7H1  2    0.112514    0.605637    1.284926    11.00000   -1.20000
H7H2  2    0.131875    0.513780    1.290702    11.00000   -1.20000
AFIX   0
C8H   1    0.169420    0.588195    1.343140    11.00000    0.03372    0.03362 =
         0.03128    0.00307    0.00132    0.00145
AFIX  23
H8H1  2    0.192971    0.645326    1.348519    11.00000   -1.20000
H8H2  2    0.213067    0.553775    1.354249    11.00000   -1.20000
AFIX   0
C9H   1    0.087565    0.573376    1.367114    11.00000    0.03516    0.03661 =
         0.03378    0.00238    0.00194    0.00309
AFIX  23
H9H1  2    0.043344    0.606632    1.355470    11.00000   -1.20000
H9H2  2    0.064935    0.515861    1.362393    11.00000   -1.20000
AFIX   0
C10H  1    0.101100    0.593053    1.414085    11.00000    0.03653    0.03968 =
         0.03550    0.00219    0.00337    0.00449
AFIX  23
H10O  2    0.145597    0.560156    1.425785    11.00000   -1.20000
H10P  2    0.123032    0.650728    1.418910    11.00000   -1.20000
AFIX   0
C11H  1    0.019496    0.577227    1.437338    11.00000    0.04067    0.04296 =
         0.03838    0.00110    0.00467    0.00335
AFIX  23
H11O  2   -0.001208    0.519095    1.433576    11.00000   -1.20000
H11P  2   -0.025812    0.608503    1.425014    11.00000   -1.20000
AFIX   0
C12H  1    0.033691    0.600509    1.484270    11.00000    0.04564    0.04527 =
         0.03769   -0.00434    0.00763    0.00614
AFIX 137
H22C  2    0.078844    0.570040    1.496588    11.00000   -1.50000
H22A  2   -0.020075    0.587801    1.498072    11.00000   -1.50000
H22B  2    0.051398    0.658599    1.488211    11.00000   -1.50000
AFIX   0
C1I   1    0.256799    0.797398    1.112432    11.00000    0.05498    0.05092 =
         0.05329    0.00718    0.00666    0.00648
AFIX  23
H1I1  2    0.218410    0.833884    1.098727    11.00000   -1.20000
H1I2  2    0.232761    0.740748    1.105795    11.00000   -1.20000
AFIX   0
C2I   1    0.265379    0.816479    1.162157    11.00000    0.05876    0.05747 =
         0.05774    0.00751    0.00498    0.00531
AFIX  23
H2I1  2    0.307388    0.782282    1.174972    11.00000   -1.20000
H2I2  2    0.287888    0.873764    1.168056    11.00000   -1.20000
AFIX   0
C3I   1    0.187964    0.802497    1.180182    11.00000    0.06303    0.06006 =
         0.06077    0.00375    0.00225    0.00534
AFIX  23
H3I1  2    0.163667    0.745955    1.173441    11.00000   -1.20000
H3I2  2    0.146584    0.838970    1.168903    11.00000   -1.20000
AFIX   0
C4I   1    0.202232    0.817895    1.228901    11.00000    0.06667    0.06096 =
         0.06156    0.00342   -0.00013    0.00891
AFIX  23
H4I1  2    0.243977    0.781530    1.239940    11.00000   -1.20000
H4I2  2    0.226912    0.874396    1.235409    11.00000   -1.20000
AFIX   0
C5I   1    0.125094    0.804357    1.248490    11.00000    0.06848    0.06284 =
         0.06390    0.00338   -0.00167    0.00843
AFIX  23
H5I1  2    0.099093    0.748928    1.240219    11.00000   -1.20000
H5I2  2    0.084782    0.842640    1.238105    11.00000   -1.20000
AFIX   0
C6I   1    0.134288    0.813813    1.296688    11.00000    0.06804    0.06212 =
         0.06459    0.00516   -0.00183    0.00799
AFIX  23
H6I1  2    0.173383    0.774744    1.307371    11.00000   -1.20000
H6I2  2    0.160745    0.868973    1.305221    11.00000   -1.20000
AFIX   0
C7I   1    0.052285    0.800453    1.315421    11.00000    0.06641    0.06268 =
         0.06685    0.00506   -0.00120    0.00733
AFIX  23
H7I1  2    0.027439    0.744151    1.308453    11.00000   -1.20000
H7I2  2    0.011934    0.837253    1.303532    11.00000   -1.20000
AFIX   0
C8I   1    0.061982    0.815186    1.363199    11.00000    0.06654    0.06388 =
         0.06928    0.00494    0.00030    0.00632
AFIX  23
H8I1  2    0.104733    0.780148    1.374588    11.00000   -1.20000
H8I2  2    0.085247    0.872070    1.369788    11.00000   -1.20000
AFIX   0
C9I   1   -0.020751    0.799194    1.385262    11.00000    0.06966    0.06736 =
         0.07326    0.00436    0.00151    0.00685
AFIX  23
H9I1  2   -0.063364    0.834491    1.373992    11.00000   -1.20000
H9I2  2   -0.044212    0.742417    1.378504    11.00000   -1.20000
AFIX   0
C10I  1   -0.011344    0.813014    1.431891    11.00000    0.06974    0.06939 =
         0.07453    0.00415    0.00282    0.00645
AFIX  23
H10Q  2    0.011540    0.869968    1.438590    11.00000   -1.20000
H10R  2    0.031887    0.778240    1.443068    11.00000   -1.20000
AFIX   0
C11I  1   -0.098518    0.795239    1.455728    11.00000    0.07012    0.07213 =
         0.07783    0.00430    0.00390    0.00600
AFIX  23
H11Q  2   -0.142948    0.827908    1.443761    11.00000   -1.20000
H11R  2   -0.119843    0.737481    1.450578    11.00000   -1.20000
AFIX   0
C12I  1   -0.087697    0.812938    1.499323    11.00000    0.07159    0.07742 =
         0.08628    0.00894    0.00552    0.00990
AFIX 137
H22F  2   -0.058259    0.770270    1.512624    11.00000   -1.50000
H22D  2   -0.144270    0.815913    1.510874    11.00000   -1.50000
H22E  2   -0.053029    0.864953    1.504818    11.00000   -1.50000
AFIX   0
C1J   1    0.570429    0.835117    1.074124    11.00000    0.02854    0.03034 =
         0.02623    0.00228    0.00259    0.00539
AFIX  23
H1J1  2    0.621012    0.872318    1.068147    11.00000   -1.20000
H1J2  2    0.540703    0.861190    1.096949    11.00000   -1.20000
AFIX   0
C2J   1    0.600798    0.760036    1.088805    11.00000    0.02963    0.03014 =
         0.02944    0.00237    0.00338    0.00674
AFIX  23
H2J1  2    0.622742    0.729443    1.064986    11.00000   -1.20000
H2J2  2    0.551920    0.726247    1.099414    11.00000   -1.20000
AFIX   0
C3J   1    0.673454    0.776928    1.124213    11.00000    0.03470    0.03544 =
         0.03451    0.00147   -0.00010    0.00476
AFIX  23
H3J1  2    0.693403    0.724702    1.132385    11.00000   -1.20000
H3J2  2    0.722846    0.808995    1.112988    11.00000   -1.20000
AFIX   0
C4J   1    0.647014    0.821467    1.162807    11.00000    0.03794    0.03717 =
         0.03639    0.00118   -0.00079    0.00421
AFIX  23
H4J1  2    0.698433    0.833591    1.182448    11.00000   -1.20000
H4J2  2    0.627427    0.873772    1.154535    11.00000   -1.20000
AFIX   0
C5J   1    0.576911    0.777499    1.185743    11.00000    0.04362    0.04033 =
         0.04088    0.00306   -0.00010    0.00417
AFIX  23
H5J1  2    0.523094    0.771191    1.167467    11.00000   -1.20000
H5J2  2    0.593265    0.722694    1.191383    11.00000   -1.20000
AFIX   0
C6J   1    0.560100    0.819452    1.225983    11.00000    0.04779    0.04721 =
         0.04762    0.00150    0.00085    0.00423
AFIX  23
H6J1  2    0.539854    0.872519    1.219590    11.00000   -1.20000
H6J2  2    0.615712    0.830309    1.242672    11.00000   -1.20000
AFIX   0
C7J   1    0.496340    0.777525    1.253167    11.00000    0.05204    0.04884 =
         0.05024    0.00167    0.00275    0.00404
AFIX  23
H7J1  2    0.440794    0.767930    1.236333    11.00000   -1.20000
H7J2  2    0.516000    0.723721    1.258387    11.00000   -1.20000
AFIX   0
C8J   1    0.478195    0.813958    1.293606    11.00000    0.05816    0.05451 =
         0.05444    0.00229    0.00451    0.00287
AFIX  23
H8J1  2    0.534736    0.828665    1.308989    11.00000   -1.20000
H8J2  2    0.453734    0.865455    1.287749    11.00000   -1.20000
AFIX   0
C9J   1    0.424254    0.774767    1.322332    11.00000    0.06385    0.06045 =
         0.05980    0.00296    0.00595    0.00146
AFIX  23
H9J1  2    0.450511    0.724516    1.328987    11.00000   -1.20000
H9J2  2    0.368932    0.757590    1.306313    11.00000   -1.20000
AFIX   0
C10J  1    0.400991    0.811000    1.363225    11.00000    0.06730    0.06554 =
         0.06289    0.00303    0.00708    0.00179
AFIX  23
H10S  2    0.455922    0.827504    1.379716    11.00000   -1.20000
H10T  2    0.374724    0.861415    1.356920    11.00000   -1.20000
AFIX   0
C11J  1    0.344847    0.768026    1.391111    11.00000    0.07181    0.07069 =
         0.06842    0.00394    0.00800    0.00214
AFIX  23
H11S  2    0.372994    0.719255    1.398685    11.00000   -1.20000
H11T  2    0.291372    0.748617    1.374064    11.00000   -1.20000
AFIX   0
C12J  1    0.317643    0.804191    1.430378    11.00000    0.07444    0.07415 =
         0.07025    0.00351    0.01232    0.00006
AFIX 137
H22I  2    0.365041    0.841156    1.443602    11.00000   -1.50000
H22G  2    0.302164    0.761357    1.449409    11.00000   -1.50000
H22H  2    0.267550    0.834221    1.424355    11.00000   -1.50000
AFIX   0
C1K   1    0.441008    0.910671    0.937932    11.00000    0.02475    0.02301 =
         0.02270    0.00391    0.00168    0.00208
AFIX  23
H1K1  2    0.497715    0.897710    0.949909    11.00000   -1.20000
H1K2  2    0.405895    0.859151    0.929655    11.00000   -1.20000
AFIX   0
C2K   1    0.453685    0.960431    0.899402    11.00000    0.02519    0.02317 =
         0.02503    0.00320    0.00030   -0.00095
AFIX  23
H2K1  2    0.495527    1.007917    0.907187    11.00000   -1.20000
H2K2  2    0.398134    0.980720    0.890525    11.00000   -1.20000
AFIX   0
C3K   1    0.486296    0.912417    0.862192    11.00000    0.02387    0.02430 =
         0.02644    0.00472   -0.00025   -0.00022
AFIX  23
H3K1  2    0.537196    0.885573    0.872122    11.00000   -1.20000
H3K2  2    0.440753    0.869615    0.851805    11.00000   -1.20000
AFIX   0
C4K   1    0.510354    0.963308    0.826837    11.00000    0.02560    0.02548 =
         0.02444    0.00393    0.00054    0.00083
AFIX  23
H4K1  2    0.553353    1.008119    0.837502    11.00000   -1.20000
H4K2  2    0.458611    0.987396    0.815638    11.00000   -1.20000
AFIX   0
C5K   1    0.547872    0.915482    0.791181    11.00000    0.03063    0.02979 =
         0.02746    0.00432    0.00111    0.00243
AFIX  23
H5K1  2    0.596946    0.888049    0.802818    11.00000   -1.20000
H5K2  2    0.503319    0.873194    0.779161    11.00000   -1.20000
AFIX   0
C6K   1    0.578748    0.968516    0.756182    11.00000    0.03241    0.03411 =
         0.03035    0.00128    0.00215    0.00220
AFIX  23
H6K1  2    0.529122    0.994266    0.743847    11.00000   -1.20000
H6K2  2    0.621524    1.012133    0.768445    11.00000   -1.20000
AFIX   0
C7K   1    0.619206    0.922259    0.721501    11.00000    0.03262    0.03519 =
         0.03103    0.00192    0.00263    0.00128
AFIX  23
H7K1  2    0.669037    0.896891    0.733898    11.00000   -1.20000
H7K2  2    0.576541    0.878260    0.709546    11.00000   -1.20000
AFIX   0
C8K   1    0.649368    0.973432    0.686425    11.00000    0.03434    0.03661 =
         0.03328    0.00224    0.00166    0.00203
AFIX  23
H8K1  2    0.690649    1.018572    0.698343    11.00000   -1.20000
H8K2  2    0.599289    0.997092    0.673130    11.00000   -1.20000
AFIX   0
C9K   1    0.693557    0.924662    0.652194    11.00000    0.03755    0.03980 =
         0.03639    0.00319    0.00146    0.00086
AFIX  23
H9K1  2    0.744458    0.901865    0.665218    11.00000   -1.20000
H9K2  2    0.652749    0.879058    0.640396    11.00000   -1.20000
AFIX   0
C10K  1    0.721680    0.977535    0.617154    11.00000    0.04038    0.04320 =
         0.03867    0.00451    0.00131    0.00261
AFIX  23
H10U  2    0.761075    1.023777    0.629399    11.00000   -1.20000
H10V  2    0.670274    0.999656    0.604220    11.00000   -1.20000
AFIX   0
C11K  1    0.766661    0.934484    0.583074    11.00000    0.04517    0.04636 =
         0.04141    0.00436    0.00204    0.00293
AFIX  23
H11U  2    0.727999    0.887257    0.571390    11.00000   -1.20000
H11V  2    0.819116    0.913865    0.595824    11.00000   -1.20000
AFIX   0
C12K  1    0.792244    0.987167    0.547424    11.00000    0.05086    0.05237 =
         0.04552    0.00980    0.00553   -0.00033
AFIX 137
H22J  2    0.740261    1.003097    0.532588    11.00000   -1.50000
H22K  2    0.824994    0.956763    0.527872    11.00000   -1.50000
H22L  2    0.827995    1.035659    0.558795    11.00000   -1.50000
AFIX   0
C1L   1    0.266869    1.055921    1.053571    11.00000    0.03517    0.03052 =
         0.03769    0.00103   -0.00035    0.00454
AFIX  23
H1L1  2    0.320935    1.077474    1.041585    11.00000   -1.20000
H1L2  2    0.219101    1.084492    1.041464    11.00000   -1.20000
AFIX   0
C2L   1    0.274449    1.071178    1.101689    11.00000    0.03790    0.03280 =
         0.03866   -0.00054    0.00024    0.00527
AFIX  23
H2L1  2    0.319525    1.038902    1.113377    11.00000   -1.20000
H2L2  2    0.294203    1.128949    1.108173    11.00000   -1.20000
AFIX   0
C3L   1    0.194457    1.051486    1.123349    11.00000    0.03773    0.03539 =
         0.03881    0.00117    0.00081    0.00510
AFIX  23
H3L1  2    0.171016    0.995440    1.114712    11.00000   -1.20000
H3L2  2    0.151179    1.088095    1.114266    11.00000   -1.20000
AFIX   0
C4L   1    0.207453    1.058969    1.170740    11.00000    0.03925    0.03815 =
         0.04033   -0.00039    0.00091    0.00621
AFIX  23
H4L1  2    0.236303    1.113307    1.179163    11.00000   -1.20000
H4L2  2    0.246359    1.018542    1.179974    11.00000   -1.20000
AFIX   0
C5L   1    0.123982    1.046687    1.193333    11.00000    0.04094    0.03978 =
         0.04235    0.00045    0.00015    0.00663
AFIX  23
H5L1  2    0.084996    1.086676    1.183623    11.00000   -1.20000
H5L2  2    0.095582    0.992188    1.184882    11.00000   -1.20000
AFIX   0
C6L   1    0.134074    1.054495    1.240721    11.00000    0.04096    0.03926 =
         0.04216   -0.00035    0.00047    0.00637
AFIX  23
H6L1  2    0.173830    1.015102    1.250364    11.00000   -1.20000
H6L2  2    0.161738    1.109283    1.249139    11.00000   -1.20000
AFIX   0
C7L   1    0.051878    1.041229    1.263362    11.00000    0.04237    0.04050 =
         0.04338    0.00077    0.00075    0.00528
AFIX  23
H7L1  2    0.011948    1.080093    1.253261    11.00000   -1.20000
H7L2  2    0.024718    0.986214    1.255048    11.00000   -1.20000
AFIX   0
C8L   1    0.059700    1.049536    1.310041    11.00000    0.04307    0.04239 =
         0.04384    0.00127    0.00067    0.00551
AFIX  23
H8L1  2    0.086305    1.104678    1.318502    11.00000   -1.20000
H8L2  2    0.099671    1.010829    1.320283    11.00000   -1.20000
AFIX   0
C9L   1   -0.022507    1.035641    1.331581    11.00000    0.04553    0.04436 =
         0.04602    0.00177    0.00002    0.00422
AFIX  23
H9L1  2   -0.049273    0.980833    1.322534    11.00000   -1.20000
H9L2  2   -0.061991    1.074728    1.321292    11.00000   -1.20000
AFIX   0
C10L  1   -0.017901    1.042387    1.378796    11.00000    0.05020    0.04750 =
         0.04882    0.00199   -0.00095    0.00562
AFIX  23
H10W  2    0.022086    1.003924    1.389301    11.00000   -1.20000
H10$  2    0.007468    1.097557    1.388048    11.00000   -1.20000
AFIX   0
C11L  1   -0.099668    1.026899    1.398632    11.00000    0.05463    0.05144 =
         0.05086    0.00166    0.00022    0.00630
AFIX  23
H11W  2   -0.123768    0.971017    1.390050    11.00000   -1.20000
H11$  2   -0.140230    1.063857    1.387082    11.00000   -1.20000
AFIX   0
C12L  1   -0.097923    1.036149    1.446051    11.00000    0.06698    0.06048 =
         0.05748    0.00389   -0.00231    0.00749
AFIX 137
H22O  2   -0.057673    1.000471    1.458256    11.00000   -1.50000
H22M  2   -0.155819    1.021556    1.455386    11.00000   -1.50000
H22N  2   -0.079149    1.092407    1.455197    11.00000   -1.50000
AFIX   0
SB1   6    0.763289    0.707232    0.984948    11.00000    0.04890    0.04358 =
         0.05016    0.00992    0.01064   -0.00169
PART 1
F1A   3    0.829272    0.679557    1.030090    21.00000    0.15030    0.02928 =
         0.06430    0.03243   -0.05648   -0.02456
F2A   3    0.728130    0.794648    1.018920    21.00000    0.10854    0.05839 =
         0.10550   -0.00660    0.08026   -0.01077
F3A   3    0.697556    0.742433    0.940843    21.00000    0.08350    0.07069 =
         0.10518    0.04982   -0.05077   -0.02113
F4A   3    0.796797    0.626184    0.951367    21.00000    0.08069    0.04248 =
         0.08119   -0.02260    0.06297   -0.01435
PART 2
F1B   3    0.860753    0.646290    0.988230   -21.00000    0.08923    0.05466 =
         0.11477    0.02676    0.01177    0.02004
F2B   3    0.787178    0.738985    1.038988   -21.00000    0.07846    0.08522 =
         0.06791    0.00011    0.00992   -0.01843
F3B   3    0.677922    0.758035    0.977295   -21.00000    0.06083    0.04976 =
         0.09945    0.02973    0.00423    0.01936
F4B   3    0.751517    0.664776    0.926652   -21.00000    0.08964    0.08009 =
         0.09201   -0.01360    0.02375   -0.03363
PART 0
F5    3    0.854900    0.780923    0.972278    11.00000    0.04771    0.03879 =
         0.06374    0.00120    0.01789   -0.01121
F6    3    0.674460    0.632409    0.999000    11.00000    0.09394    0.10729 =
         0.08617    0.00509    0.03303   -0.06623
HKLF 4

REM  141111Pt6DDT12Ag_0m in P-1
REM R1 =  0.0638 for   14873 Fo > 4sig(Fo)  and  0.1504 for all   28627 data
REM   1580 parameters refined using   1785 restraints

END

WGHT      0.1074      0.0000

REM Highest difference peak  2.687,  deepest hole -2.410,  1-sigma level  0.384
Q1    1   0.3551  0.6167  0.9174  11.00000  0.05    2.69
Q2    1   0.4597  0.7495  0.9736  11.00000  0.05    2.54
Q3    1   0.3937  0.8896  1.0131  11.00000  0.05    2.47
Q4    1  -0.0694  0.8395  1.1549  11.00000  0.05    2.24
Q5    1   0.0790  0.7686  0.9609  11.00000  0.05    2.15
Q6    1   0.1921  0.9036  1.0191  11.00000  0.05    2.13
Q7    1  -0.0586  0.7868  1.1201  11.00000  0.05    1.94
Q8    1  -0.1067  0.7934  1.1943  11.00000  0.05    1.94
Q9    1   0.2512  0.9227  0.9424  11.00000  0.05    1.88
Q10   1   0.1409  0.7911  0.8884  11.00000  0.05    1.88
Q11   1   0.2355  0.7682  1.1517  11.00000  0.05    1.84
Q12   1   0.0102  0.8287  1.1009  11.00000  0.05    1.84
Q13   1   0.1720  0.6192  0.9017  11.00000  0.05    1.83
Q14   1  -0.0569  0.8196  1.0787  11.00000  0.05    1.75
Q15   1  -0.0591  0.8592  1.0663  11.00000  0.05    1.71
Q16   1   0.1755  0.4423  0.9310  11.00000  0.05    1.71
Q17   1   0.3018  0.5746  0.9619  11.00000  0.05    1.67
Q18   1   0.7592  0.7321  0.9502  11.00000  0.05    1.64
Q19   1   0.4614  0.7202  1.0522  11.00000  0.05    1.64
Q20   1  -0.1281  0.8443  1.2285  11.00000  0.05    1.63
Q21   1   0.2612  0.8277  1.2227  11.00000  0.05    1.62
Q22   1   0.6977  0.6769  0.9694  11.00000  0.05    1.62
Q23   1  -0.1840  0.8532  1.2541  11.00000  0.05    1.49
Q24   1   0.6868  0.5995  1.0012  11.00000  0.05    1.47
Q25   1   0.7851  0.8882  1.0394  11.00000  0.05    1.46
Q26   1   0.0972  0.6187  0.9123  11.00000  0.05    1.44
Q27   1  -0.1418  0.8153  1.2206  11.00000  0.05    1.40
Q28   1   0.7109  0.7808  1.0577  11.00000  0.05    1.40
Q29   1   0.5949  0.6570  0.8089  11.00000  0.05    1.39
Q30   1   0.7796  0.7017  1.0274  11.00000  0.05    1.38
Q31   1   0.4224  0.7140  1.0218  11.00000  0.05    1.38
Q32   1   0.8832  0.6822  1.0189  11.00000  0.05    1.38
Q33   1   0.7124  0.7447  1.0912  11.00000  0.05    1.36
Q34   1  -0.1073  0.8726  1.1935  11.00000  0.05    1.34
Q35   1   0.1429  1.0584  1.1710  11.00000  0.05    1.32
Q36   1   0.4204  0.5392  1.0563  11.00000  0.05    1.32
Q37   1   0.2201  1.0831  1.1604  11.00000  0.05    1.31
Q38   1   0.0029  0.9025  1.0824  11.00000  0.05    1.30
Q39   1  -0.0002  0.5625  1.1629  11.00000  0.05    1.29
Q40   1   0.6548  0.6486  0.7933  11.00000  0.05    1.28
Q41   1   0.1033  0.9699  0.9007  11.00000  0.05    1.28
Q42   1   0.1774  0.8142  1.2390  11.00000  0.05    1.28
Q43   1  -0.0623  0.7009  1.1283  11.00000  0.05    1.28
Q44   1   0.5399  0.6843  1.1095  11.00000  0.05    1.26
Q45   1  -0.0966  0.7008  1.1631  11.00000  0.05    1.25
Q46   1   0.6991  0.6939  0.8658  11.00000  0.05    1.24
Q47   1  -0.2419  0.8069  0.8393  11.00000  0.05    1.24
Q48   1   0.2594  0.8498  1.1835  11.00000  0.05    1.24
Q49   1   0.2616  1.1064  1.1886  11.00000  0.05    1.24
Q50   1   0.0001  0.8093  1.1780  11.00000  0.05    1.24
Q51   1   0.5836  0.7018  0.8427  11.00000  0.05    1.23
Q52   1   0.6575  0.7037  0.8130  11.00000  0.05    1.23
Q53   1  -0.1652  0.7923  1.2598  11.00000  0.05    1.22
Q54   1  -0.0326  0.5256  1.1316  11.00000  0.05    1.21
Q55   1  -0.1777  0.7531  1.1813  11.00000  0.05    1.21
Q56   1   0.6953  0.7470  0.8379  11.00000  0.05    1.20
Q57   1   0.2764  1.1414  1.1577  11.00000  0.05    1.20
Q58   1   0.6345  0.6844  0.8306  11.00000  0.05    1.20
Q59   1   0.5560  0.6450  0.8383  11.00000  0.05    1.20
Q60   1   0.0631  0.7961  0.9056  11.00000  0.05    1.18
Q61   1   0.6304  0.7988  1.1795  11.00000  0.05    1.18
Q62   1   0.7168  0.6717  0.7887  11.00000  0.05    1.18
Q63   1   0.7974  0.7268  1.0611  11.00000  0.05    1.17
Q64   1  -0.1784  0.7955  0.8143  11.00000  0.05    1.17
Q65   1   0.7883  0.7752  1.0362  11.00000  0.05    1.17
Q66   1   0.5436  0.6905  0.8118  11.00000  0.05    1.17
Q67   1   0.5655  0.6754  0.8505  11.00000  0.05    1.16
Q68   1  -0.0051  0.8213  1.1424  11.00000  0.05    1.16
Q69   1   0.1045  0.4940  1.1904  11.00000  0.05    1.16
Q70   1   0.6231  0.7510  0.8299  11.00000  0.05    1.15
Q71   1   0.6257  0.8110  0.8021  11.00000  0.05    1.14
Q72   1   0.8370  0.7065  0.9961  11.00000  0.05    1.14
Q73   1  -0.1143  0.8653  1.1366  11.00000  0.05    1.14
Q74   1   0.7017  0.6809  0.8224  11.00000  0.05    1.13
Q75   1  -0.1521  0.7432  1.1186  11.00000  0.05    1.13
Q76   1  -0.2826  0.6375  0.8655  11.00000  0.05    1.13
Q77   1  -0.1428  0.7007  1.1370  11.00000  0.05    1.12
Q78   1   0.2087  0.6167  0.9285  11.00000  0.05    1.12
Q79   1  -0.0352  0.8747  1.1205  11.00000  0.05    1.12
Q80   1   0.0333  0.8681  1.1765  11.00000  0.05    1.12
Q81   1   0.3515  0.5830  0.9933  11.00000  0.05    1.12
Q82   1   0.8039  0.7015  0.9553  11.00000  0.05    1.12
Q83   1  -0.1536  0.7756  1.1526  11.00000  0.05    1.12
Q84   1   0.8157  0.7732  0.9925  11.00000  0.05    1.11
Q85   1   0.3190  0.5409  1.2082  11.00000  0.05    1.11
Q86   1  -0.0389  0.6144  1.1795  11.00000  0.05    1.11
Q87   1   0.0201  0.9675  1.1959  11.00000  0.05    1.11
Q88   1  -0.1973  0.6650  0.8312  11.00000  0.05    1.11
Q89   1  -0.1812  0.8069  0.8580  11.00000  0.05    1.10
Q90   1   0.8192  0.8359  0.9877  11.00000  0.05    1.10
Q91   1   0.6945  0.7862  0.8360  11.00000  0.05    1.10
Q92   1  -0.1670  0.8926  1.1745  11.00000  0.05    1.10
Q93   1   0.6164  0.6940  0.8977  11.00000  0.05    1.10
Q94   1  -0.2046  0.7420  0.8762  11.00000  0.05    1.10
Q95   1   0.7196  0.6961  0.8271  11.00000  0.05    1.10
Q96   1   0.1347  0.6198  0.9364  11.00000  0.05    1.09
Q97   1   0.3182  1.1430  1.1884  11.00000  0.05    1.09
Q98   1   0.0080  0.6566  1.1875  11.00000  0.05    1.09
Q99   1   0.7664  0.7974  0.9724  11.00000  0.05    1.09
Q100  1  -0.2116  0.7119  0.8396  11.00000  0.05    1.09
;
_shelx_res_checksum                     95012

_shelx_hkl_file                         
;
  -1   0   0   -0.14    0.04
   1   0   0   -0.15    0.05
  -2   0   0   82.65    1.61
  -2   0   0   88.68    1.72
   2   0   0   88.95    1.73
  -3   0   0    0.55    0.23
  -3   0   0    0.29    0.14
   3   0   0    0.35    0.26
  -4   0   0    4.21    0.29
  -4   0   0    4.96    0.44
   4   0   0    5.68    0.48
  -5   0   0    0.26    0.30
  -5   0   0   -0.04    0.20
   5   0   0    0.03    0.34
  -6   0   0   25.45    1.01
  -6   0   0   25.71    0.72
   6   0   0   26.55    1.08
  -7   0   0   28.02    0.77
  -7   0   0   26.37    1.11
   7   0   0   29.22    1.22
  -8   0   0   90.98    1.91
  -8   0   0   95.20    2.37
   8   0   0   90.63    2.44
  -9   0   0   20.76    1.12
  -9   0   0   20.96    0.71
   9   0   0   19.43    1.26
 -10   0   0    4.53    0.70
  10   0   0    3.11    0.81
 -11   0   0   14.27    1.11
  11   0   0   15.83    1.34
 -12   0   0    1.33    0.73
  12   0   0    2.23    1.01
 -13   0   0   14.38    1.30
  13   0   0   14.95    1.56
 -14   0   0    1.05    0.87
  14   0   0   -0.29    1.06
 -15   0   0   -0.84    0.90
  15   0   0    1.81    1.17
 -16   0   0    0.03    1.07
 -17   0   0   -0.58    1.12
 -18   0   0   -1.83    1.10
 -18   1   0   -0.05    1.30
 -17   1   0    1.14    1.11
  16  -1   0    5.46    1.68
 -16   1   0    5.56    1.28
  15  -1   0    0.76    1.13
 -15   1   0   -1.32    0.87
  14  -1   0   11.77    1.54
 -14   1   0   12.02    1.34
  13  -1   0    0.60    1.11
 -13   1   0    1.47    0.82
  12  -1   0    6.48    1.20
 -12   1   0    6.88    0.97
  11  -1   0    4.11    0.96
 -11   1   0    2.97    0.72
  10  -1   0    1.03    0.73
 -10   1   0    0.81    0.55
 -10   1   0    0.70    0.30
   9  -1   0    1.32    0.65
  -9   1   0    1.17    0.30
  -9   1   0    1.94    0.54
   8  -1   0    1.73    0.58
  -8   1   0    1.35    0.30
  -8   1   0    1.48    0.47
   7  -1   0    1.91    0.55
  -7   1   0    1.36    0.43
  -7   1   0    2.51    0.32
   6  -1   0    5.97    0.59
  -6   1   0    5.38    0.53
  -6   1   0    5.91    0.43
   5  -1   0   40.83    1.25
  -5   1   0   40.65    0.98
  -5   1   0   41.84    1.20
   4  -1   0    6.30    0.51
  -4   1   0    5.09    0.37
  -4   1   0    6.27    0.47
   3  -1   0   24.79    0.76
  -3   1   0   23.34    0.62
  -3   1   0   25.09    0.74
   2  -1   0    3.89    0.30
  -2   1   0    4.54    0.31
  -2   1   0    4.05    0.23
   1  -1   0    0.00    0.08
  -1   1   0    0.04    0.05
  -1   1   0    0.02    0.06
   0   1   0   -0.06    0.04
   1   1   0    0.14    0.09
  -2  -1   0    0.06    0.10
  -2  -1   0   -0.08    0.17
   2   1   0   -0.01    0.18
  -3  -1   0   14.48    0.45
  -3  -1   0   15.65    0.61
   3   1   0   14.70    0.64
  -4  -1   0    0.54    0.24
  -4  -1   0   -0.17    0.28
   4   1   0   -0.43    0.36
  -5  -1   0    3.41    0.41
  -5  -1   0    3.67    0.32
   5   1   0    4.12    0.52
  -6  -1   0   39.73    0.96
  -6  -1   0   38.18    1.24
   6   1   0   40.13    1.33
  -7  -1   0  150.96    2.91
  -7  -1   0  147.69    3.31
   7   1   0  154.23    3.38
  -8  -1   0  127.83    2.96
  -8  -1   0  121.03    2.46
   8   1   0  124.85    3.02
  -9  -1   0   46.94    1.61
  -9  -1   0   41.81    1.08
   9   1   0   43.79    1.70
 -10  -1   0    6.15    0.80
  10   1   0    6.20    0.92
 -11  -1   0    4.76    0.80
  11   1   0    5.02    0.99
 -12  -1   0    2.68    0.79
  12   1   0    3.95    1.06
 -13  -1   0    1.45    0.86
  13   1   0    1.86    1.03
 -14  -1   0   13.06    1.36
  14   1   0   12.80    1.48
 -15  -1   0   -0.31    0.97
  15   1   0    1.78    1.14
 -16  -1   0   34.90    2.36
 -17  -1   0   -0.32    1.16
 -18  -1   0    0.09    1.29
 -18   2   0    1.36    1.32
 -17   2   0    4.07    1.29
  16  -2   0   -1.82    1.25
 -16   2   0   -1.01    1.01
  15  -2   0    2.63    1.33
 -15   2   0    2.21    1.01
  14  -2   0    1.85    1.26
 -14   2   0    2.56    0.93
  13  -2   0   -1.39    1.06
 -13   2   0   -0.54    0.72
  12  -2   0   -0.09    0.96
 -12   2   0    0.74    0.69
  11  -2   0    4.52    0.97
 -11   2   0    4.59    0.77
  10  -2   0    2.74    0.77
 -10   2   0    2.60    0.38
 -10   2   0    1.92    0.63
   9  -2   0   11.49    0.99
  -9   2   0   12.96    0.97
  -9   2   0   11.83    0.61
   8  -2   0   22.03    1.19
  -8   2   0   18.94    1.05
  -8   2   0   19.92    0.75
   7  -2   0   20.17    1.08
  -7   2   0   19.63    0.72
  -7   2   0   21.05    1.00
   6  -2   0   34.09    1.22
  -6   2   0   33.56    1.13
  -6   2   0   33.13    0.93
   5  -2   0    6.35    0.56
  -5   2   0    5.09    0.37
  -5   2   0    5.11    0.47
   4  -2   0   38.73    1.16
  -4   2   0   39.49    0.99
  -4   2   0   41.17    1.12
   3  -2   0    8.66    0.55
  -3   2   0    9.25    0.50
  -3   2   0    8.53    0.44
   2  -2   0    1.30    0.25
  -2   2   0    0.90    0.19
  -2   2   0    0.84    0.19
   1  -2   0    2.72    0.26
   0   2   0   24.31    0.65
   1   2   0    0.72    0.20
   2   2   0   24.48    0.74
  -3  -2   0    1.93    0.32
   3   2   0    1.68    0.34
  -4  -2   0    6.35    0.39
  -4  -2   0    5.49    0.46
   4   2   0    6.10    0.52
  -5  -2   0    0.96    0.35
  -5  -2   0    1.21    0.26
   5   2   0    1.54    0.42
  -6  -2   0   64.93    1.47
  -6  -2   0   66.74    1.76
   6   2   0   63.85    1.75
  -7  -2   0   56.92    1.67
  -7  -2   0   58.09    1.37
   7   2   0   57.63    1.72
  -8  -2   0   94.40    2.42
  -8  -2   0   94.20    2.00
   8   2   0   91.32    2.44
  -9  -2   0   16.69    0.69
  -9  -2   0   18.64    1.11
   9   2   0   16.50    1.20
 -10  -2   0    1.20    0.59
  10   2   0    0.18    0.67
 -11  -2   0    6.99    0.92
  11   2   0    8.95    1.07
 -12  -2   0    1.57    0.79
  12   2   0    0.11    0.86
 -13  -2   0   12.73    1.30
  13   2   0   20.10    1.60
 -14  -2   0    2.77    1.04
  14   2   0    3.72    1.09
 -15  -2   0   65.71    2.75
  15   2   0   68.39    3.41
 -16  -2   0    0.72    1.14
 -17  -2   0    8.82    1.61
 -18  -2   0    1.13    1.37
 -18   3   0   -0.41    1.22
 -17   3   0   -0.73    1.08
  16  -3   0    3.21    1.46
 -16   3   0    1.57    1.07
  15  -3   0    4.95    1.44
 -15   3   0    3.86    1.11
  14  -3   0   82.23    3.21
 -14   3   0   80.92    2.87
  13  -3   0   16.82    1.68
 -13   3   0   16.12    1.32
  12  -3   0   23.64    1.88
 -12   3   0   24.72    1.57
  11  -3   0    1.82    0.87
 -11   3   0    0.70    0.63
  10  -3   0    0.00    0.68
 -10   3   0    0.31    0.35
 -10   3   0    0.66    0.53
   9  -3   0    7.96    0.87
  -9   3   0    6.91    0.53
  -9   3   0    7.25    0.75
   8  -3   0    1.72    0.60
  -8   3   0    1.95    0.35
  -8   3   0    2.06    0.48
   7  -3   0    0.94    0.49
  -7   3   0    1.00    0.40
  -7   3   0    1.15    0.32
   6  -3   0    1.82    0.47
  -6   3   0    0.68    0.39
  -6   3   0    1.90    0.33
   5  -3   0    8.42    0.64
  -5   3   0    7.66    0.50
  -5   3   0    9.53    0.64
   4  -3   0    0.68    0.33
  -4   3   0    0.01    0.24
  -4   3   0    0.45    0.29
   3  -3   0    9.41    0.64
   2  -3   0    1.24    0.31
   1  -3   0  133.85    2.74
   0   3   0    8.64    0.50
   1   3   0   70.86    1.60
   2   3   0   12.87    0.65
   3   3   0   26.42    0.93
  -4  -3   0   13.94    0.72
   4   3   0   13.96    0.76
  -5  -3   0   25.46    0.99
  -5  -3   0   24.38    0.78
   5   3   0   25.32    1.02
  -6  -3   0    0.84    0.41
  -6  -3   0    1.27    0.32
   6   3   0    1.40    0.47
  -7  -3   0    0.47    0.32
  -7  -3   0    0.30    0.42
   7   3   0    0.22    0.45
  -8  -3   0    0.55    0.50
  -8  -3   0    0.79    0.38
   8   3   0    1.37    0.56
  -9  -3   0    0.08    0.51
  -9  -3   0   -0.18    0.36
   9   3   0    0.77    0.59
 -10  -3   0    6.64    0.83
  10   3   0    6.66    0.89
 -11  -3   0    8.51    0.99
  11   3   0    8.63    1.06
 -12  -3   0   -1.57    0.71
  12   3   0    0.80    0.86
 -13  -3   0    0.12    0.81
  13   3   0    0.05    0.90
 -14  -3   0   35.53    2.11
  14   3   0   37.27    2.20
 -15  -3   0    2.66    1.17
 -16  -3   0   32.32    2.31
 -17  -3   0    0.61    1.27
 -18   4   0    1.26    1.31
  17  -4   0    5.52    2.45
 -17   4   0    2.01    1.27
  16  -4   0    0.37    1.41
 -16   4   0    1.26    1.10
  15  -4   0   42.02    2.64
 -15   4   0   45.18    2.39
  14  -4   0   17.34    1.76
 -14   4   0   26.77    1.79
  13  -4   0   86.53    3.24
 -13   4   0   91.23    2.82
  12  -4   0   12.18    1.36
 -12   4   0   14.34    1.23
  11  -4   0    0.14    0.77
 -11   4   0   -1.30    0.57
  10  -4   0    1.72    0.77
 -10   4   0    1.73    0.62
   9  -4   0   -0.16    0.56
  -9   4   0    0.83    0.51
   8  -4   0    9.52    0.91
  -8   4   0    8.20    0.62
  -8   4   0    9.11    0.77
   7  -4   0   12.86    0.98
  -7   4   0   12.55    0.86
  -7   4   0   12.63    0.67
   6  -4   0  133.96    3.08
  -6   4   0  139.58    2.96
  -6   4   0  129.14    2.80
   5  -4   0    9.40    0.77
  -5   4   0    8.70    0.65
   4  -4   0   32.62    1.17
   3  -4   0    2.96    0.45
   2  -4   0   18.14    0.83
   1  -4   0   17.88    0.81
   0   4   0    5.01    0.48
   1   4   0    4.69    0.48
   2   4   0   24.31    0.91
   3   4   0    2.03    0.42
  -4  -4   0    4.88    0.48
   4   4   0    6.01    0.57
  -5  -4   0   10.83    0.77
   5   4   0   11.48    0.82
  -6  -4   0   16.53    0.72
  -6  -4   0   16.23    0.94
   6   4   0   16.39    0.97
  -7  -4   0    9.80    0.78
  -7  -4   0   10.25    0.64
   7   4   0    9.51    0.82
  -8  -4   0    0.52    0.34
  -8  -4   0    0.86    0.51
   8   4   0    0.43    0.53
  -9  -4   0    1.84    0.72
  -9  -4   0    2.81    0.67
   9   4   0    3.80    0.74
 -10  -4   0    0.18    0.61
  10   4   0    0.76    0.72
 -11  -4   0    7.73    1.00
  11   4   0   10.74    1.16
 -12  -4   0    0.00    0.79
  12   4   0   -0.46    0.85
 -13  -4   0    5.44    1.10
  13   4   0    9.31    1.29
 -14  -4   0    1.93    1.01
  14   4   0    2.89    1.11
 -15  -4   0    2.17    1.24
 -16  -4   0    1.95    1.29
 -17  -4   0   -2.19    1.13
 -18   5   0   10.15    1.63
  17  -5   0   -0.99    1.50
 -17   5   0    0.07    1.17
  16  -5   0   -0.95    1.29
 -16   5   0    2.59    1.15
  15  -5   0    2.48    1.35
 -15   5   0    3.44    1.08
  14  -5   0   27.57    2.26
 -14   5   0   31.81    1.89
  13  -5   0   11.38    1.46
 -13   5   0   14.18    1.31
  12  -5   0    8.44    1.19
 -12   5   0    8.84    1.07
  11  -5   0   -0.10    0.82
 -11   5   0    0.98    0.66
  10  -5   0   -0.76    0.65
 -10   5   0   -0.08    0.53
   9  -5   0    0.02    0.59
  -9   5   0    0.59    0.49
   8  -5   0   19.55    1.20
  -8   5   0   18.84    1.07
   7  -5   0  136.40    3.30
  -7   5   0  142.37    3.15
   6  -5   0   57.20    1.77
   5  -5   0  194.89    4.18
   4  -5   0   11.71    0.81
   3  -5   0    0.37    0.37
   2  -5   0    3.61    0.52
   1  -5   0    0.39    0.37
   0   5   0   -0.13    0.35
   1   5   0  241.27    4.82
   2   5   0    9.12    0.68
   3   5   0   49.91    1.49
   4   5   0    0.95    0.43
  -5  -5   0   25.71    1.07
   5   5   0   25.78    1.12
  -6  -5   0   22.51    1.09
   6   5   0   22.46    1.10
  -7  -5   0   12.85    0.73
  -7  -5   0   11.81    0.87
   7   5   0   12.77    1.00
  -8  -5   0    2.63    0.47
  -8  -5   0    1.27    0.56
   8   5   0    1.86    0.59
  -9  -5   0    0.01    0.58
   9   5   0    0.29    0.63
 -10  -5   0    0.04    0.64
  10   5   0   -0.95    0.66
 -11  -5   0    0.56    0.77
  11   5   0    2.20    0.86
 -12  -5   0    5.87    1.06
  12   5   0    5.81    1.09
 -13  -5   0    3.90    1.06
  13   5   0    5.10    1.13
 -14  -5   0   26.34    2.00
  14   5   0   27.68    2.39
 -15  -5   0   -2.60    1.04
 -16  -5   0   -2.48    1.20
 -17  -5   0   -0.28    1.35
 -18   6   0   -1.53    1.25
  17  -6   0    2.63    1.63
 -17   6   0    4.52    1.41
  16  -6   0   -0.57    1.40
 -16   6   0    1.59    1.20
  15  -6   0    2.39    1.39
 -15   6   0    1.20    1.02
  14  -6   0   -0.87    1.09
 -14   6   0    0.79    0.85
  13  -6   0    5.26    1.24
 -13   6   0    6.11    1.03
  12  -6   0    4.27    1.13
 -12   6   0    4.81    0.91
  11  -6   0    8.86    1.20
 -11   6   0    8.19    0.99
  10  -6   0   21.97    1.59
 -10   6   0   20.98    1.33
   9  -6   0    3.92    0.79
  -9   6   0    3.89    0.69
   8  -6   0    0.26    0.56
   7  -6   0    8.73    0.88
   6  -6   0   98.91    2.59
   5  -6   0    2.79    0.54
   4  -6   0    1.47    0.46
   3  -6   0    0.33    0.41
   2  -6   0    0.59    0.42
   1  -6   0    0.06    0.39
   1   6   0   22.22    1.04
   2   6   0  267.02    5.38
   3   6   0   41.62    1.45
   4   6   0   22.54    1.13
   5   6   0   -0.20    0.43
  -6  -6   0    1.31    0.48
   6   6   0    0.57    0.50
  -7  -6   0    2.89    0.60
  -7  -6   0    3.04    0.50
   7   6   0    3.71    0.67
  -8  -6   0   15.72    0.89
  -8  -6   0   15.75    1.19
   8   6   0   15.79    1.20
  -9  -6   0   45.28    1.84
   9   6   0   45.19    1.83
 -10  -6   0   16.00    1.26
  10   6   0   16.79    1.33
 -11  -6   0   20.65    1.52
  11   6   0   22.40    1.60
 -12  -6   0    0.13    0.89
  12   6   0    0.63    0.88
 -13  -6   0   12.80    1.46
  13   6   0   13.50    1.46
 -14  -6   0    0.06    1.05
 -15  -6   0   -0.74    1.17
 -16  -6   0   -1.83    1.24
 -17  -6   0    1.69    1.49
  17  -7   0    1.81    1.60
  16  -7   0    9.69    1.81
  15  -7   0   -0.02    1.28
  14  -7   0    4.87    1.34
  13  -7   0    0.58    1.09
  12  -7   0   -0.36    0.99
  11  -7   0    0.70    0.89
  10  -7   0    7.18    1.05
   9  -7   0   11.15    1.07
   8  -7   0    1.13    0.64
   7  -7   0    2.42    0.63
   6  -7   0    2.52    0.59
   5  -7   0    0.89    0.47
   4  -7   0    0.26    0.45
   3  -7   0   36.50    1.43
   2  -7   0    0.66    0.47
   1  -7   0    1.99    0.52
   1   7   0  116.03    2.81
   2   7   0    5.04    0.67
   3   7   0   39.71    1.49
   4   7   0    1.82    0.57
   5   7   0    2.65    0.63
  -6  -7   0    2.11    0.53
   6   7   0    1.85    0.60
  -7  -7   0    4.96    0.73
   7   7   0    5.53    0.78
  -8  -7   0   24.93    1.16
  -8  -7   0   27.53    1.42
   8   7   0   25.08    1.47
  -9  -7   0   31.65    1.66
   9   7   0   32.02    1.68
 -10  -7   0   56.53    2.19
  10   7   0   48.67    2.10
 -11  -7   0    3.78    1.00
  11   7   0    4.48    1.02
 -12  -7   0    0.94    0.92
  12   7   0    1.66    0.91
 -13  -7   0    0.64    1.08
  13   7   0    0.49    1.00
 -14  -7   0    3.52    1.24
 -15  -7   0   -0.71    1.26
 -16  -7   0   12.86    1.92
  17  -8   0   -1.11    1.55
  16  -8   0   -0.25    1.42
  15  -8   0    2.22    1.40
  14  -8   0   -1.81    1.09
  13  -8   0   -0.30    1.02
  12  -8   0   -1.03    0.91
  11  -8   0    1.19    0.93
  10  -8   0    1.92    0.82
   9  -8   0    7.64    1.04
   8  -8   0   41.88    1.82
   7  -8   0    4.06    0.76
   6  -8   0    7.54    0.85
   5  -8   0    0.92    0.56
   4  -8   0   28.43    1.37
   3  -8   0    1.36    0.55
   2  -8   0   32.67    1.45
   1  -8   0    0.43    0.49
   0  -8   0   54.18    1.85
   1   8   0    0.61    0.54
   2   8   0   -0.31    0.50
   3   8   0    0.36    0.52
   4   8   0   17.66    1.19
   5   8   0    4.58    0.75
  -6  -8   0    0.53    0.51
   6   8   0    0.27    0.56
  -7  -8   0    5.52    0.79
   7   8   0    6.26    0.90
  -8  -8   0   11.91    1.06
  -8  -8   0   12.60    0.94
   8   8   0   10.77    1.10
  -9  -8   0   33.04    1.72
   9   8   0   28.62    1.74
 -10  -8   0    5.24    0.99
  10   8   0    4.12    1.00
 -11  -8   0   12.14    1.32
  11   8   0   12.93    1.37
 -12  -8   0   -0.08    0.97
  12   8   0    0.27    0.89
 -13  -8   0    2.41    1.19
 -14  -8   0    2.24    1.23
 -15  -8   0    3.96    1.49
 -16  -8   0    2.19    1.36
  17  -9   0    0.42    1.60
  16  -9   0    1.13    1.48
  15  -9   0   -2.40    1.22
  14  -9   0    0.74    1.25
  13  -9   0   16.25    1.74
  12  -9   0   28.79    2.12
  11  -9   0   42.58    2.30
  10  -9   0    3.96    0.99
   9  -9   0   -0.31    0.70
   8  -9   0    0.95    0.68
   7  -9   0    3.17    0.78
   6  -9   0   -0.20    0.52
   5  -9   0   13.12    1.10
   4  -9   0    0.18    0.51
   3  -9   0    9.89    0.95
   2  -9   0    0.78    0.55
   1  -9   0   19.45    1.27
   0  -9   0    1.78    0.62
   2   9   0    8.44    0.90
   3   9   0    3.28    0.71
   4   9   0   17.62    1.28
   5   9   0    5.40    0.85
  -6  -9   0    5.77    0.76
   6   9   0    5.83    0.91
  -7  -9   0    0.45    0.61
   7   9   0    0.04    0.69
  -8  -9   0    0.55    0.72
   8   9   0   -0.59    0.75
  -9  -9   0    1.19    0.76
   9   9   0   -0.43    0.80
 -10  -9   0    0.34    0.81
  10   9   0    0.24    0.88
 -11  -9   0    0.17    0.85
  11   9   0   -1.23    0.81
 -12  -9   0    7.63    1.32
  12   9   0    8.81    1.33
 -13  -9   0    1.15    1.17
 -14  -9   0    1.05    1.31
 -15  -9   0   -1.69    1.27
  16 -10   0    2.10    1.56
  15 -10   0   -1.58    1.27
  14 -10   0   -1.33    1.21
  13 -10   0   32.56    2.47
  12 -10   0   37.72    2.40
  11 -10   0   30.70    2.06
  10 -10   0    8.36    1.27
   9 -10   0    1.35    0.85
   8 -10   0   10.64    1.18
   7 -10   0   -0.06    0.66
   6 -10   0   11.58    1.12
   5 -10   0    1.10    0.64
   4 -10   0  116.95    3.24
   3 -10   0    0.18    0.58
   2 -10   0    3.49    0.74
   1 -10   0    0.30    0.61
   0 -10   0   43.30    1.84
   2  10   0   -0.20    0.61
   3  10   0    4.89    0.86
   4  10   0    2.28    0.74
   5  10   0    3.34    0.83
   6  10   0    1.42    0.78
  -7 -10   0    4.46    0.81
   7  10   0    2.98    0.95
  -8 -10   0    3.13    0.87
   8  10   0    4.58    1.05
  -9 -10   0    7.47    1.06
   9  10   0    7.29    1.17
 -10 -10   0    0.59    0.87
  10  10   0   -0.54    0.88
 -11 -10   0    2.78    1.10
  11  10   0    1.01    1.01
 -12 -10   0   -0.96    1.06
  12  10   0    3.30    1.17
 -13 -10   0   -1.99    1.11
 -14 -10   0    2.17    1.41
 -15 -10   0    2.80    1.52
  16 -11   0    7.65    1.88
  15 -11   0   -0.07    1.40
  14 -11   0   -0.17    1.27
  13 -11   0    8.65    1.62
  12 -11   0    9.47    1.48
  11 -11   0    3.07    1.11
  10 -11   0   -0.86    0.81
   9 -11   0    3.32    0.98
   8 -11   0    0.80    0.80
   7 -11   0    2.59    0.88
   6 -11   0    1.96    0.75
   5 -11   0  140.24    3.81
   4 -11   0   -0.57    0.59
   3 -11   0  111.05    3.28
   2 -11   0   -0.32    0.57
   1 -11   0   16.85    1.37
   0 -11   0    1.35    0.72
  -1 -11   0    4.51    0.89
   2  11   0    7.35    1.01
   3  11   0  112.00    3.24
   4  11   0   29.81    1.72
   5  11   0   31.33    1.79
   6  11   0   -1.16    0.72
  -7 -11   0    5.63    0.91
   7  11   0    6.87    1.14
  -8 -11   0   23.35    1.65
   8  11   0   23.72    1.87
  -9 -11   0   -0.35    0.81
   9  11   0    0.37    0.92
 -10 -11   0   -0.24    0.92
  10  11   0    0.30    0.96
 -11 -11   0    0.46    1.13
  11  11   0    3.91    1.22
 -12 -11   0    3.48    1.31
 -13 -11   0    1.02    1.26
 -14 -11   0    2.90    1.50
  15 -12   0   -0.70    1.50
  14 -12   0   -2.61    1.29
  13 -12   0   -0.49    1.18
  12 -12   0    0.04    1.15
  11 -12   0    0.34    1.05
  10 -12   0   16.47    1.62
   9 -12   0    3.90    1.07
   8 -12   0    9.60    1.29
   7 -12   0    0.05    0.76
   6 -12   0    9.94    1.22
   5 -12   0    2.32    0.82
   4 -12   0   44.77    2.08
   3 -12   0    0.58    0.72
   2 -12   0    7.42    1.04
   1 -12   0    2.99    0.89
   0 -12   0   20.01    1.60
  -1 -12   0    0.51    0.77
   3  12   0   47.29    2.17
   4  12   0   62.56    2.44
   5  12   0   20.94    1.65
   6  12   0    1.98    0.97
  -7 -12   0    9.86    1.13
   7  12   0   14.15    1.46
  -8 -12   0    3.77    0.99
   8  12   0    2.94    1.08
  -9 -12   0    4.50    1.01
   9  12   0    4.69    1.20
 -10 -12   0    1.11    1.04
  10  12   0    4.04    1.22
 -11 -12   0   70.57    3.02
  11  12   0   64.89    3.03
 -12 -12   0    0.07    1.23
 -13 -12   0    1.85    1.39
  15 -13   0   -0.81    1.48
  14 -13   0    0.00    1.43
  13 -13   0    1.78    1.36
  12 -13   0    3.00    1.33
  11 -13   0    5.38    1.40
  10 -13   0    5.11    1.27
   9 -13   0    5.06    1.18
   8 -13   0   -0.66    0.84
   7 -13   0   -0.58    0.79
   6 -13   0    0.25    0.79
   5 -13   0    0.80    0.81
   4 -13   0   -0.20    0.73
   3 -13   0    5.65    1.10
   2 -13   0    0.52    0.78
   1 -13   0    5.70    1.10
   0 -13   0    0.89    0.84
  -1 -13   0    5.14    1.13
  -2 -13   0    3.18    1.09
   4  13   0    9.58    1.31
   5  13   0    4.29    1.08
   6  13   0    6.21    1.20
  -7 -13   0    4.64    1.02
   7  13   0    4.31    1.15
  -8 -13   0    1.82    0.96
   8  13   0    2.38    1.08
  -9 -13   0    4.37    1.19
   9  13   0    6.79    1.34
  10  13   0   51.37    2.84
  11  13   0   10.49    2.29
  14 -14   0    3.58    1.66
  13 -14   0   -2.68    1.18
  12 -14   0    1.43    1.37
  11 -14   0    2.19    1.32
  10 -14   0    7.27    1.43
   9 -14   0    1.21    1.05
   8 -14   0    1.48    1.02
   7 -14   0    1.27    0.95
   6 -14   0   14.40    1.60
   5 -14   0    0.55    0.88
   4 -14   0    9.27    1.32
   3 -14   0    1.31    0.96
   2 -14   0   18.56    1.68
   1 -14   0    1.06    0.95
   0 -14   0    0.73    1.01
  -1 -14   0    0.86    0.96
  -2 -14   0    5.67    1.22
  -3 -14   0    2.01    1.06
   5  14   0    3.00    1.13
   6  14   0   10.71    1.47
   7  14   0   10.75    1.53
   8  14   0    0.25    1.10
   9  14   0    4.42    1.37
  10  14   0    1.24    1.19
  13 -15   0    0.32    1.41
  12 -15   0    2.72    1.49
  11 -15   0   27.77    2.33
  10 -15   0    7.19    1.56
   9 -15   0   30.67    2.43
   8 -15   0    0.20    1.05
   7 -15   0    3.41    1.14
   6 -15   0    0.02    0.94
   5 -15   0    3.64    1.18
   4 -15   0   -0.34    0.90
   3 -15   0    7.69    1.35
   2 -15   0    3.04    1.12
   1 -15   0   19.69    1.89
   0 -15   0    2.59    1.16
  -1 -15   0    4.63    1.30
  -2 -15   0    6.28    1.35
  -3 -15   0    3.67    1.20
   6  15   0    0.90    1.11
   7  15   0   -0.99    1.09
   8  15   0    1.21    1.23
   9  15   0   -0.14    1.22
  10  15   0    0.49    1.42
  12 -16   0   13.23    1.95
  11 -16   0   10.91    1.82
  10 -16   0   53.50    3.14
   9 -16   0    5.04    1.51
   8 -16   0   -1.37    1.08
   7 -16   0   -0.09    1.03
   6 -16   0    6.98    1.45
   5 -16   0   -0.72    0.98
   4 -16   0   33.30    2.45
   3 -16   0    1.58    1.16
   2 -16   0   63.49    3.09
   1 -16   0    1.72    1.20
   0 -16   0    2.29    1.24
  -1 -16   0    1.57    1.30
  -2 -16   0    6.53    1.46
  -3 -16   0    1.34    1.28
  -4 -16   0    1.84    1.38
   7  16   0   -0.36    1.19
   8  16   0    1.33    1.33
   9  16   0    6.46    1.60
  10 -17   0    0.87    1.35
   9 -17   0    0.06    1.30
   8 -17   0   -1.39    1.17
   7 -17   0   16.45    1.94
   6 -17   0   -0.91    1.13
   5 -17   0    2.55    1.33
   4 -17   0    0.61    1.29
   3 -17   0   62.52    3.20
   2 -17   0    8.29    1.76
   1 -17   0   10.31    1.72
   0 -17   0    0.77    1.31
  -1 -17   0    2.07    1.41
  -2 -17   0   -1.14    1.24
  -3 -17   0    6.06    1.67
  -4 -17   0   22.01    2.38
  -5 -17   0   21.91    2.39
   9 -18   0    0.55    1.40
   8 -18   0    5.28    1.67
   7 -18   0   -0.26    1.31
   6 -18   0    5.88    1.56
   5 -18   0   -0.28    1.25
   4 -18   0    5.24    1.63
   3 -18   0    0.20    1.32
   2 -18   0    4.88    1.63
   1 -18   0    0.38    1.37
   0 -18   0    0.31    1.36
  -1 -18   0    7.02    1.74
  -2 -18   0   -1.19    1.33
  -3 -18   0    2.85    1.79
  -4 -18   0   12.04    2.08
  -5 -18   0   21.36    2.59
  -6 -18   0    4.81    1.87
   6 -19   0    0.37    1.39
   5 -19   0    6.80    1.72
   4 -19   0    0.69    1.34
   3 -19   0   -1.85    1.27
   2 -19   0    1.02    1.51
   1 -19   0    1.76    1.57
   0 -19   0    2.97    1.69
  -1 -19   0    6.29    1.85
  -2 -19   0    2.44    1.67
  -3 -19   0    0.42    1.64
  -3 -19   1   -2.78    1.54
  -2 -19   1    4.71    1.82
  -1 -19   1    9.20    2.06
   0 -19   1    0.94    1.50
   1 -19   1    0.12    1.51
   2 -19   1   -0.32    1.44
   3 -19   1    1.00    1.46
   4 -19   1    0.44    1.44
   5 -19   1    5.01    1.65
   6 -19   1    1.04    1.39
  -6 -18   1    3.48    1.71
  -5 -18   1   25.03    2.68
  -4 -18   1    4.06    1.72
  -3 -18   1    1.74    1.52
  -2 -18   1    2.12    1.51
  -1 -18   1    1.56    1.46
   0 -18   1    0.22    1.38
   1 -18   1    0.05    1.33
   2 -18   1    1.70    1.46
   3 -18   1    0.82    1.32
   4 -18   1    4.54    1.57
   5 -18   1    0.94    1.32
   6 -18   1    9.70    1.74
   7 -18   1    0.23    1.33
   8 -18   1    3.05    1.51
   9 -18   1    1.06    1.45
  -5 -17   1   12.63    2.02
  -4 -17   1   12.24    1.96
  -3 -17   1   -1.06    1.24
  -2 -17   1    1.59    1.45
  -1 -17   1    1.42    1.39
   0 -17   1    3.99    1.49
   1 -17   1   39.64    2.86
   2 -17   1   16.41    2.02
   3 -17   1   61.25    3.34
   4 -17   1    2.37    1.30
   5 -17   1   -1.21    1.09
   6 -17   1    1.77    1.21
   7 -17   1    9.93    1.68
   8 -17   1   -0.91    1.20
   9 -17   1    7.19    1.68
  10 -17   1    0.12    1.35
   9  16  -1    1.39    1.36
   8  16  -1    0.07    1.29
   7  16  -1    1.84    1.33
   6  16  -1    1.33    1.30
  -4 -16   1    1.13    1.29
  -3 -16   1    2.96    1.36
  -2 -16   1    5.55    1.46
  -1 -16   1   -0.65    1.10
   0 -16   1    3.33    1.31
   1 -16   1    6.40    1.41
   2 -16   1   60.75    3.00
   3 -16   1    3.80    1.31
   4 -16   1   14.25    1.68
   5 -16   1    0.36    1.09
   6 -16   1    6.73    1.41
   7 -16   1    0.04    1.09
   8 -16   1   10.12    1.63
   9 -16   1    2.19    1.39
  10 -16   1   54.91    3.05
  11 -16   1    3.05    1.53
  12 -16   1    4.50    1.60
  10  15  -1    3.41    1.43
   9  15  -1    1.95    1.32
   8  15  -1    2.96    1.35
   7  15  -1   -0.68    1.07
   6  15  -1    2.48    1.22
   5  15  -1   -0.98    1.05
  -3 -15   1    2.56    1.21
  -2 -15   1    6.37    1.42
  -1 -15   1    2.01    1.11
   0 -15   1    0.83    1.09
   1 -15   1   10.10    1.51
   2 -15   1    1.70    1.01
   3 -15   1    3.90    1.16
   4 -15   1    0.27    0.88
   5 -15   1    7.40    1.32
   6 -15   1    1.64    0.99
   7 -15   1    0.25    0.99
   8 -15   1    0.18    1.04
   9 -15   1   49.43    2.82
  10 -15   1    4.19    1.43
  11 -15   1   20.30    2.14
  12 -15   1    0.70    1.37
  13 -15   1   -0.27    1.37
  11  14  -1   15.64    1.99
  10  14  -1    1.47    1.23
   9  14  -1    1.40    1.16
   8  14  -1    1.27    1.15
   7  14  -1   14.35    1.67
   6  14  -1    3.69    1.24
   5  14  -1    1.43    1.01
   4  14  -1    1.08    0.99
  -2 -14   1    0.72    0.93
  -1 -14   1    0.88    0.99
   0 -14   1    3.10    1.09
   1 -14   1    3.25    1.06
   2 -14   1    9.77    1.33
   3 -14   1    2.95    1.01
   4 -14   1   11.58    1.37
   5 -14   1    0.71    0.89
   6 -14   1   11.28    1.40
   7 -14   1    0.38    0.90
   8 -14   1    3.44    1.15
   9 -14   1    0.15    1.09
  10 -14   1    1.82    1.23
  11 -14   1   -0.81    1.14
  12 -14   1    1.81    1.34
  13 -14   1   -2.38    1.25
  14 -14   1   -1.45    1.45
  11  13  -1    3.87    1.37
  10  13  -1   35.91    2.46
   9  13  -1    2.79    1.15
   8  13  -1    7.29    1.34
   7  13  -1    1.99    1.02
   6  13  -1    0.88    1.00
   5  13  -1    9.30    1.32
   4  13  -1   22.71    1.77
   3  13  -1   34.77    2.16
  -1 -13   1    0.54    0.83
   0 -13   1    0.08    0.80
   1 -13   1   19.52    1.64
   2 -13   1    3.28    0.96
   3 -13   1    0.18    0.79
   4 -13   1    0.37    0.82
   5 -13   1    0.86    0.81
   6 -13   1   -1.03    0.76
   7 -13   1    0.80    0.81
   8 -13   1    1.26    0.95
   9 -13   1    4.80    1.15
  10 -13   1    2.43    1.10
  11 -13   1    2.21    1.22
  12 -13   1    2.53    1.32
  13 -13   1    2.52    1.48
  14 -13   1    2.14    1.58
  15 -13   1   -0.77    1.44
 -13 -12   1   18.58    2.04
 -12 -12   1    0.83    1.23
  11  12  -1   57.71    2.85
 -11 -12   1   65.04    3.09
  10  12  -1    0.65    1.08
 -10 -12   1   -1.36    0.95
   9  12  -1   -0.93    0.96
  -9 -12   1   -0.58    0.83
   8  12  -1    3.69    1.09
  -8 -12   1    2.68    0.92
   7  12  -1    7.90    1.26
  -7 -12   1    7.20    1.02
   6  12  -1   -0.42    0.85
  -6 -12   1    1.09    0.72
   5  12  -1   56.07    2.43
   4  12  -1   65.55    2.53
   3  12  -1   62.31    2.45
  -1 -12   1   -0.06    0.70
   0 -12   1   40.24    2.03
   1 -12   1    2.98    0.86
   2 -12   1    0.72    0.72
   3 -12   1    0.59    0.71
   4 -12   1   62.35    2.46
   5 -12   1    0.29    0.71
   6 -12   1    2.62    0.88
   7 -12   1   -0.09    0.74
   8 -12   1   22.97    1.80
   9 -12   1    0.69    0.93
  10 -12   1   14.53    1.54
  11 -12   1    1.60    1.07
  12 -12   1   -0.20    1.08
  13 -12   1   -0.08    1.24
  14 -12   1    1.11    1.47
  15 -12   1    0.61    1.49
 -14 -11   1   -0.18    1.35
 -13 -11   1   -2.22    1.10
  12  11  -1    1.10    1.16
 -12 -11   1   -1.61    1.19
  11  11  -1    1.20    1.10
 -11 -11   1   -1.87    0.96
  10  11  -1    3.18    1.13
 -10 -11   1    3.25    1.09
   9  11  -1   -0.39    0.96
  -9 -11   1    1.32    0.87
   8  11  -1   26.48    1.88
  -8 -11   1   27.85    1.66
   7  11  -1    0.44    0.92
  -7 -11   1    1.00    0.74
   6  11  -1    4.77    1.00
  -6 -11   1    5.02    0.82
   5  11  -1   43.48    2.04
   4  11  -1   52.77    2.21
   3  11  -1   70.48    2.48
   2  11  -1    4.21    0.90
   0 -11   1    6.93    1.02
   1 -11   1    3.36    0.82
   2 -11   1    2.98    0.78
   3 -11   1  199.35    4.88
   4 -11   1   -0.71    0.65
   5 -11   1  119.18    3.44
   6 -11   1   -0.25    0.65
   7 -11   1    0.15    0.67
   8 -11   1    0.49    0.79
   9 -11   1    1.05    0.88
  10 -11   1    1.92    0.94
  11 -11   1   22.80    1.89
  12 -11   1    9.49    1.46
  13 -11   1    7.69    1.53
  14 -11   1   -1.89    1.19
  15 -11   1   -1.41    1.43
  16 -11   1    6.24    1.88
 -15 -10   1   -1.03    1.35
 -14 -10   1   -0.48    1.24
 -13 -10   1   -0.72    1.13
  12  10  -1   -0.78    1.01
 -12 -10   1    0.15    1.13
  11  10  -1    4.44    1.19
 -11 -10   1    7.21    1.29
  10  10  -1   -0.71    0.92
 -10 -10   1    0.98    0.90
   9  10  -1   11.28    1.35
  -9 -10   1   10.95    1.18
   8  10  -1    4.38    1.03
  -8 -10   1    4.20    0.88
   7  10  -1    3.00    0.90
  -7 -10   1    2.25    0.75
   6  10  -1    0.59    0.74
  -6 -10   1   -0.33    0.55
   5  10  -1    6.96    1.00
   4  10  -1    4.54    0.84
   3  10  -1    2.98    0.75
   2  10  -1    3.77    0.77
   1  10  -1    2.01    0.69
   0 -10   1   23.30    1.45
   1 -10   1    0.72    0.61
   2 -10   1   45.21    1.88
   3 -10   1    4.33    0.80
   4 -10   1  114.10    3.22
   5 -10   1    0.09    0.58
   6 -10   1    1.47    0.69
   7 -10   1    0.75    0.67
   8 -10   1    8.28    1.07
   9 -10   1    2.52    0.90
  10 -10   1   35.05    2.11
  11 -10   1   30.55    2.12
  12 -10   1   44.12    2.43
  13 -10   1    7.46    1.48
  14 -10   1   -0.77    1.26
  15 -10   1    0.91    1.37
  16 -10   1   -1.56    1.45
 -15  -9   1    0.50    1.33
 -14  -9   1    5.03    1.43
  13   9  -1   -0.02    1.07
 -13  -9   1    0.62    1.17
  12   9  -1    6.84    1.29
 -12  -9   1    9.49    1.38
  11   9  -1    0.39    0.91
 -11  -9   1   -0.16    0.90
  10   9  -1    0.07    0.88
 -10  -9   1    0.15    0.83
   9   9  -1   -0.81    0.83
  -9  -9   1    0.15    0.73
   8   9  -1   -0.42    0.75
  -8  -9   1    1.70    0.75
   7   9  -1    0.01    0.69
  -7  -9   1    0.79    0.63
   6   9  -1    8.94    1.01
  -6  -9   1    9.89    0.88
   5   9  -1    5.31    0.86
   4   9  -1   24.52    1.38
   3   9  -1    4.72    0.78
   2   9  -1    8.97    0.93
   1   9  -1    4.90    0.78
   0  -9   1    9.18    0.98
   1  -9   1   31.70    1.51
   2  -9   1    0.81    0.54
   3  -9   1   18.21    1.22
   4  -9   1   -0.03    0.49
   5  -9   1    2.29    0.63
   6  -9   1   -0.02    0.54
   7  -9   1   12.65    1.18
   8  -9   1    1.41    0.70
   9  -9   1    2.60    0.89
  10  -9   1    8.74    1.19
  11  -9   1   63.71    2.63
  12  -9   1   21.86    1.85
  13  -9   1    6.02    1.33
  14  -9   1   -0.70    1.15
  15  -9   1   -2.65    1.25
  16  -9   1   -2.50    1.36
  17  -9   1   -1.94    1.51
 -16  -8   1   -0.98    1.39
 -15  -8   1    2.36    1.37
 -14  -8   1   -0.11    1.17
  13   8  -1    1.79    1.03
 -13  -8   1    0.38    1.07
  12   8  -1    0.92    0.99
 -12  -8   1    1.61    0.99
  11   8  -1   12.98    1.37
 -11  -8   1   13.37    1.32
  10   8  -1    7.63    1.17
 -10  -8   1   10.31    1.17
   9   8  -1   37.06    1.92
  -9  -8   1   37.80    1.85
   8   8  -1    3.24    0.83
  -8  -8   1    4.60    0.79
   7   8  -1    3.27    0.79
  -7  -8   1    2.07    0.63
   6   8  -1    3.39    0.71
  -6  -8   1    3.55    0.62
   5   8  -1    4.82    0.76
   4   8  -1    9.71    0.93
   3   8  -1    0.18    0.53
   2   8  -1    2.31    0.62
   1   8  -1    0.42    0.53
   1  -8   1    1.18    0.56
   2  -8   1   87.73    2.48
   3  -8   1    0.58    0.50
   4  -8   1   31.98    1.43
   5  -8   1    1.83    0.56
   6  -8   1   19.13    1.22
   7  -8   1    4.05    0.73
   8  -8   1   42.17    1.85
   9  -8   1    3.02    0.84
  10  -8   1   -0.05    0.77
  11  -8   1    2.99    1.03
  12  -8   1    3.54    1.15
  13  -8   1   -1.81    1.00
  14  -8   1    5.59    1.42
  15  -8   1    0.14    1.30
  16  -8   1   -2.51    1.31
  17  -8   1    0.60    1.60
 -16  -7   1    3.80    1.49
 -15  -7   1   -1.38    1.14
 -14  -7   1    9.12    1.48
  13   7  -1    2.52    1.13
 -13  -7   1    1.88    1.07
  12   7  -1    9.30    1.31
 -12  -7   1    8.77    1.26
  11   7  -1    4.33    1.02
 -11  -7   1    2.10    0.90
  10   7  -1   92.05    2.89
 -10  -7   1   95.67    2.89
   9   7  -1   20.22    1.42
  -9  -7   1   17.04    1.25
   8   7  -1   18.41    1.33
  -8  -7   1   20.13    1.29
  -8  -7   1   17.42    1.01
   7   7  -1    1.89    0.65
  -7  -7   1    0.66    0.54
   6   7  -1    2.94    0.65
  -6  -7   1    3.24    0.58
   5   7  -1    0.55    0.51
  -5  -7   1    0.02    0.39
   4   7  -1    0.97    0.50
   3   7  -1   58.92    1.83
   2   7  -1   23.05    1.15
   1   7  -1   59.93    1.83
   0   7  -1    1.32    0.51
   1  -7   1    0.94    0.47
   2  -7   1    1.02    0.49
   3  -7   1   35.39    1.41
   4  -7   1    0.78    0.48
   5  -7   1    5.47    0.69
   6  -7   1    3.96    0.69
   7  -7   1    0.16    0.50
   8  -7   1    1.54    0.65
   9  -7   1   22.04    1.51
  10  -7   1    5.20    0.98
  11  -7   1    0.81    0.88
 -12   7  -1    1.16    0.80
  12  -7   1    0.99    1.04
 -13   7  -1    0.33    0.82
  13  -7   1    2.91    1.17
 -14   7  -1    0.35    0.90
  14  -7   1   -0.62    1.10
 -15   7  -1    1.61    1.08
  15  -7   1    2.83    1.38
 -16   7  -1    6.27    1.36
  16  -7   1    4.15    1.55
  17  -7   1    2.32    1.66
 -17  -6   1    1.22    1.36
 -16  -6   1    2.95    1.42
 -15  -6   1    6.03    1.46
  14   6  -1    0.48    1.03
 -14  -6   1   -0.36    1.06
  13   6  -1    8.65    1.32
 -13  -6   1    8.03    1.25
  12   6  -1    3.22    1.04
 -12  -6   1    2.77    1.01
  11   6  -1   39.42    1.96
 -11  -6   1   39.22    1.96
  10   6  -1   11.16    1.16
 -10  -6   1   10.68    1.12
   9   6  -1   43.97    1.85
  -9  -6   1   45.35    1.81
   8   6  -1    6.57    0.87
  -8  -6   1    4.50    0.72
  -8  -6   1    5.51    0.59
   7   6  -1    0.88    0.57
  -7  -6   1    1.49    0.52
   6   6  -1    0.54    0.49
  -6  -6   1    0.83    0.47
   5   6  -1    7.17    0.74
  -5  -6   1    7.41    0.66
   4   6  -1   57.89    1.75
   3   6  -1  101.75    2.50
   2   6  -1  272.14    5.49
   1   6  -1   28.71    1.20
   0   6  -1   50.74    1.56
   1  -6   1    0.32    0.41
   2  -6   1    0.47    0.41
   3  -6   1    0.58    0.43
   4  -6   1   18.75    1.02
   5  -6   1    0.76    0.45
   6  -6   1  107.18    2.75
   7  -6   1    1.30    0.55
  -8   6  -1    1.47    0.49
   8  -6   1    1.75    0.63
  -9   6  -1    5.39    0.70
   9  -6   1    4.16    0.78
 -10   6  -1   21.67    1.35
  10  -6   1   20.49    1.56
 -11   6  -1    4.88    0.85
  11  -6   1    6.64    1.10
 -12   6  -1    0.93    0.79
  12  -6   1   -0.58    0.91
 -13   6  -1    0.43    0.84
  13  -6   1   -0.44    0.98
 -14   6  -1   -0.70    0.85
  14  -6   1    0.84    1.10
 -15   6  -1    1.70    1.03
  15  -6   1   -0.46    1.21
 -16   6  -1    0.71    1.10
  16  -6   1    2.98    1.54
 -17   6  -1    8.18    1.55
  17  -6   1   10.00    2.72
 -18   6  -1   -0.38    1.30
 -17  -5   1   -1.08    1.27
 -16  -5   1    0.92    1.28
 -15  -5   1   -0.22    1.14
  14   5  -1   24.84    1.95
 -14  -5   1   19.16    1.72
  13   5  -1    0.67    0.96
 -13  -5   1    0.95    0.94
  12   5  -1    8.13    1.22
 -12  -5   1    7.26    1.15
  11   5  -1    1.79    0.84
 -11  -5   1    0.35    0.72
  10   5  -1    4.38    0.90
 -10  -5   1    3.25    0.77
   9   5  -1   -0.46    0.63
  -9  -5   1   -0.06    0.60
   8   5  -1    7.98    0.88
  -8  -5   1    8.62    0.66
  -8  -5   1    8.78    0.82
   7   5  -1   17.16    1.09
  -7  -5   1   16.19    0.77
  -7  -5   1   16.88    1.03
   6   5  -1   31.19    1.30
  -6  -5   1   28.34    1.16
   5   5  -1    5.75    0.66
  -5  -5   1    5.55    0.56
   4   5  -1    1.88    0.48
  -4  -5   1    1.72    0.39
   3   5  -1  117.46    2.70
   2   5  -1   28.61    1.09
   1   5  -1   67.67    1.75
   0   5  -1    0.29    0.36
   1  -5   1    3.60    0.52
   2  -5   1    0.34    0.35
   3  -5   1   11.91    0.79
   4  -5   1    3.42    0.51
  -5   5  -1  303.59    5.91
   5  -5   1  306.74    6.14
  -6   5  -1   24.73    0.98
  -6   5  -1   26.16    1.04
   6  -5   1   25.83    1.19
  -7   5  -1  103.30    2.47
  -7   5  -1  103.69    2.40
   7  -5   1  102.36    2.65
  -8   5  -1    7.18    0.71
  -8   5  -1    7.46    0.62
   8  -5   1    7.76    0.84
  -9   5  -1    1.06    0.49
  -9   5  -1    0.67    0.42
   9  -5   1   -0.03    0.57
 -10   5  -1    0.07    0.56
  10  -5   1    0.23    0.71
 -11   5  -1    0.25    0.64
  11  -5   1    0.95    0.86
 -12   5  -1   10.17    1.12
  12  -5   1    9.89    1.28
 -13   5  -1   16.45    1.35
  13  -5   1   19.21    1.69
 -14   5  -1   30.70    1.88
  14  -5   1   30.15    2.25
 -15   5  -1    2.23    1.08
  15  -5   1    3.37    1.38
 -16   5  -1    4.49    1.25
  16  -5   1    4.35    1.56
 -17   5  -1    2.40    1.28
 -18   5  -1    5.59    1.48
 -17  -4   1   -0.95    1.27
 -16  -4   1   -0.67    1.12
 -15  -4   1   -1.58    1.07
  14   4  -1    0.88    1.08
 -14  -4   1    1.14    1.04
  13   4  -1    7.23    1.27
 -13  -4   1    6.72    1.11
  12   4  -1    0.10    0.89
 -12  -4   1   -0.14    0.77
  11   4  -1   26.75    1.73
 -11  -4   1   23.49    1.52
  10   4  -1    1.12    0.76
 -10  -4   1    0.04    0.62
   9   4  -1    4.34    0.79
  -9  -4   1    2.99    0.65
   8   4  -1    0.45    0.56
  -8  -4   1    0.12    0.32
  -8  -4   1    0.61    0.49
   7   4  -1   10.40    0.85
  -7  -4   1   10.32    0.82
  -7  -4   1   11.80    0.62
   6   4  -1   16.68    1.01
  -6  -4   1   15.06    0.91
  -6  -4   1   16.43    0.68
   5   4  -1    6.00    0.63
  -5  -4   1    6.65    0.56
   4   4  -1   -0.03    0.38
  -4  -4   1    1.09    0.33
   3   4  -1    8.09    0.62
   2   4  -1   33.71    1.10
   1   4  -1    4.53    0.48
   0   4  -1  228.12    4.48
   1  -4   1    0.13    0.33
   2  -4   1   33.60    1.10
  -3   4  -1    5.04    0.43
   3  -4   1    5.40    0.53
  -4   4  -1   90.25    2.00
  -4   4  -1   89.75    2.02
   4  -4   1   91.25    2.18
  -5   4  -1    2.34    0.38
  -5   4  -1    2.32    0.37
   5  -4   1    2.25    0.46
  -6   4  -1  129.44    2.81
  -6   4  -1  124.67    2.71
   6  -4   1  127.96    2.96
  -7   4  -1    2.07    0.46
  -7   4  -1    1.92    0.39
   7  -4   1    2.36    0.54
  -8   4  -1    2.60    0.54
  -8   4  -1    2.77    0.43
   8  -4   1    1.97    0.58
  -9   4  -1    0.63    0.37
  -9   4  -1    0.97    0.51
   9  -4   1   -0.71    0.53
 -10   4  -1    0.09    0.53
 -10   4  -1    0.13    0.39
  10  -4   1    0.85    0.69
 -11   4  -1    5.81    0.84
 -11   4  -1    5.59    0.62
  11  -4   1    6.31    1.02
 -12   4  -1   35.85    1.81
  12  -4   1   35.43    2.04
 -13   4  -1   60.84    2.36
  13  -4   1   59.61    2.68
 -14   4  -1   32.47    1.92
  14  -4   1   31.50    2.27
 -15   4  -1   19.07    1.69
  15  -4   1   17.12    1.86
 -16   4  -1    1.12    1.09
  16  -4   1   -1.92    1.36
 -17   4  -1    3.71    1.36
 -18   4  -1   -1.80    1.21
 -18  -3   1    1.55    1.45
 -17  -3   1   -0.05    1.24
 -16  -3   1   43.36    2.66
  15   3  -1    0.21    1.09
 -15  -3   1    1.20    1.06
  14   3  -1   12.12    1.47
 -14  -3   1   13.08    1.41
  13   3  -1    1.28    0.99
 -13  -3   1    1.28    0.89
  12   3  -1    0.97    0.87
 -12  -3   1   -0.17    0.69
  11   3  -1    2.63    0.85
 -11  -3   1    1.51    0.73
  10   3  -1    2.14    0.78
 -10  -3   1    2.16    0.68
   9   3  -1    0.90    0.60
  -9  -3   1    0.64    0.52
   8   3  -1    3.94    0.69
  -8  -3   1    3.62    0.42
  -8  -3   1    4.23    0.61
   7   3  -1    0.08    0.48
  -7  -3   1    0.32    0.27
  -7  -3   1   -0.22    0.39
   6   3  -1    6.34    0.66
  -6  -3   1    5.89    0.58
  -6  -3   1    6.94    0.48
   5   3  -1   40.44    1.32
  -5  -3   1   42.01    1.01
  -5  -3   1   39.03    1.24
   4   3  -1   14.90    0.79
  -4  -3   1   14.09    0.72
   3   3  -1   43.84    1.23
  -3  -3   1   43.08    1.14
   2   3  -1    8.05    0.59
   1   3  -1   68.70    1.58
   0   3  -1    7.98    0.51
   1  -3   1  283.15    5.37
  -2   3  -1    6.05    0.43
   2  -3   1    6.70    0.55
  -3   3  -1    2.62    0.34
  -3   3  -1    2.35    0.32
   3  -3   1    3.11    0.40
  -4   3  -1    6.38    0.47
  -4   3  -1    6.62    0.50
   4  -3   1    6.36    0.53
  -5   3  -1    5.70    0.44
  -5   3  -1    6.40    0.51
   5  -3   1    6.73    0.61
  -6   3  -1    0.24    0.34
  -6   3  -1    0.25    0.30
   6  -3   1    0.62    0.41
  -7   3  -1    5.27    0.57
  -7   3  -1    5.14    0.46
   7  -3   1    5.99    0.67
  -8   3  -1    1.81    0.47
  -8   3  -1    1.74    0.37
   8  -3   1    3.09    0.64
  -9   3  -1    3.66    0.60
  -9   3  -1    4.61    0.48
   9  -3   1    5.18    0.76
 -10   3  -1   -0.36    0.50
 -10   3  -1    0.55    0.37
  10  -3   1    0.18    0.66
 -11   3  -1    3.89    0.76
 -11   3  -1    3.68    0.59
  11  -3   1    4.60    0.97
 -12   3  -1   28.61    1.58
  12  -3   1   26.68    1.90
 -13   3  -1   41.57    2.01
  13  -3   1   38.77    2.35
 -14   3  -1   47.44    2.20
  14  -3   1   45.87    2.53
 -15   3  -1    3.71    1.10
  15  -3   1    3.15    1.35
 -16   3  -1   -0.08    1.04
  16  -3   1    0.50    1.44
 -17   3  -1    0.61    1.13
 -18   3  -1    0.78    1.24
 -18  -2   1   -0.88    1.23
 -17  -2   1   26.05    2.15
 -16  -2   1   -0.32    1.07
  15   2  -1   60.79    2.77
 -15  -2   1   56.73    2.69
  14   2  -1    1.42    1.03
 -14  -2   1    0.39    0.92
  13   2  -1    5.32    1.17
 -13  -2   1    4.57    0.99
  12   2  -1    0.19    0.87
 -12  -2   1    0.20    0.70
  11   2  -1    1.75    0.84
 -11  -2   1    1.83    0.68
  10   2  -1    9.51    1.05
 -10  -2   1   10.76    0.97
   9   2  -1   42.20    1.67
  -9  -2   1   40.84    1.03
  -9  -2   1   44.08    1.58
   8   2  -1   87.74    2.37
  -8  -2   1   84.07    2.26
  -8  -2   1   85.75    1.77
   7   2  -1   54.30    1.68
  -7  -2   1   53.22    1.58
  -7  -2   1   50.48    1.19
   6   2  -1   24.47    1.08
  -6  -2   1   22.09    0.98
  -6  -2   1   23.58    0.71
   5   2  -1    1.34    0.42
  -5  -2   1    0.28    0.20
  -5  -2   1    0.76    0.34
   4   2  -1   13.18    0.76
  -4  -2   1   13.37    0.69
  -4  -2   1   13.74    0.46
   3   2  -1    5.43    0.45
  -3  -2   1    5.75    0.40
   2   2  -1    2.27    0.31
  -2  -2   1    2.20    0.25
   1   2  -1    2.16    0.26
   0   2  -1   32.58    0.80
  -1   2  -1    2.67    0.23
   1  -2   1    2.31    0.26
  -2   2  -1   18.88    0.56
  -2   2  -1   18.72    0.57
   2  -2   1   19.54    0.64
  -3   2  -1    7.99    0.49
  -3   2  -1    7.51    0.45
   3  -2   1    7.86    0.51
  -4   2  -1   23.67    0.82
  -4   2  -1   22.70    0.72
   4  -2   1   23.55    0.87
  -5   2  -1    9.85    0.66
  -5   2  -1    8.55    0.51
   5  -2   1   10.15    0.73
  -6   2  -1   31.39    1.08
  -6   2  -1   30.24    0.92
   6  -2   1   32.22    1.18
  -7   2  -1   12.40    0.81
  -7   2  -1   12.00    0.59
   7  -2   1   13.44    0.94
  -8   2  -1   18.12    0.73
  -8   2  -1   20.24    1.00
   8  -2   1   19.39    1.14
  -9   2  -1    8.67    0.77
  -9   2  -1    8.03    0.57
   9  -2   1    8.23    0.90
 -10   2  -1    1.63    0.37
 -10   2  -1    3.07    0.66
  10  -2   1    1.20    0.75
 -11   2  -1    2.37    0.67
  11  -2   1    1.57    0.86
 -12   2  -1    3.49    0.80
  12  -2   1    0.76    0.96
 -13   2  -1    0.75    0.77
  13  -2   1   -1.11    1.01
 -14   2  -1    0.96    0.83
  14  -2   1   -0.89    1.12
 -15   2  -1    1.25    0.92
  15  -2   1    3.24    1.36
 -16   2  -1   -1.37    0.91
 -17   2  -1    1.67    1.22
 -18   2  -1    0.95    1.28
 -18  -1   1    1.17    1.33
 -17  -1   1   -0.09    1.14
  16   1  -1   35.13    3.08
 -16  -1   1   41.12    2.55
  15   1  -1    1.83    1.14
 -15  -1   1   -1.03    0.91
  14   1  -1    8.19    1.37
 -14  -1   1    6.94    1.17
  13   1  -1    2.32    1.10
 -13  -1   1    2.77    0.87
  12   1  -1    0.07    0.87
 -12  -1   1    0.49    0.70
  11   1  -1   -0.56    0.80
 -11  -1   1    0.19    0.62
  10   1  -1   34.54    1.73
 -10  -1   1   34.89    1.50
   9   1  -1   49.60    1.81
  -9  -1   1   44.70    1.05
  -9  -1   1   47.07    1.62
   8   1  -1  164.95    3.78
  -8  -1   1  164.11    3.13
  -8  -1   1  170.67    3.70
   7   1  -1   83.80    2.21
  -7  -1   1   81.67    1.65
  -7  -1   1   83.12    2.12
   6   1  -1   23.05    1.07
  -6  -1   1   22.86    0.61
  -6  -1   1   24.73    0.98
   5   1  -1    0.91    0.42
  -5  -1   1    0.58    0.33
  -5  -1   1    0.50    0.20
   4   1  -1    1.73    0.43
  -4  -1   1    2.14    0.23
  -4  -1   1    0.79    0.32
   3   1  -1    0.17    0.30
  -3  -1   1    0.11    0.12
  -3  -1   1    0.63    0.25
   2   1  -1    5.92    0.40
  -2  -1   1    5.89    0.34
   1   1  -1    0.11    0.09
   0   1  -1   -0.01    0.05
   0   1  -1   -0.07    0.05
  -1   1  -1   -0.05    0.07
   1  -1   1    0.04    0.09
  -2   1  -1    0.31    0.14
  -2   1  -1    0.53    0.17
   2  -1   1    0.46    0.17
  -3   1  -1   76.67    1.58
  -3   1  -1   78.39    1.66
   3  -1   1   79.35    1.68
  -4   1  -1    0.43    0.29
  -4   1  -1    0.26    0.23
   4  -1   1    0.51    0.33
  -5   1  -1   34.69    0.91
  -5   1  -1   35.55    1.09
   5  -1   1   35.89    1.12
  -6   1  -1   -0.01    0.25
  -6   1  -1    0.00    0.33
   6  -1   1    0.39    0.39
  -7   1  -1    0.62    0.38
  -7   1  -1    0.25    0.27
   7  -1   1   -0.22    0.43
  -8   1  -1    0.64    0.44
  -8   1  -1    0.29    0.30
   8  -1   1    0.49    0.52
  -9   1  -1    0.34    0.48
  -9   1  -1    0.14    0.30
   9  -1   1    0.44    0.58
 -10   1  -1    0.99    0.33
 -10   1  -1    0.43    0.55
  10  -1   1    0.95    0.70
 -11   1  -1    7.76    0.89
  11  -1   1    6.72    1.04
 -12   1  -1    9.50    1.04
  12  -1   1    8.34    1.20
 -13   1  -1    0.49    0.81
  13  -1   1    3.25    1.17
 -14   1  -1    2.17    0.94
  14  -1   1    3.88    1.21
 -15   1  -1    0.96    0.92
  15  -1   1    3.11    1.21
 -16   1  -1    2.31    1.15
 -17   1  -1   -0.30    1.10
 -18   1  -1   -2.49    1.14
 -18   0   1   -1.44    1.23
 -17   0   1    0.39    1.14
  16   0  -1   -0.15    1.25
 -16   0   1   -1.72    0.90
  15   0  -1    1.45    1.21
 -15   0   1    0.99    1.01
  14   0  -1   -1.24    1.07
 -14   0   1    1.24    0.89
  13   0  -1   15.80    1.62
 -13   0   1   15.83    1.34
  12   0  -1    3.09    1.08
 -12   0   1    1.02    0.70
  11   0  -1    2.30    0.91
 -11   0   1    2.82    0.70
  10   0  -1   12.55    1.14
 -10   0   1   12.76    0.98
   9   0  -1   62.27    2.05
  -9   0   1   59.62    1.33
  -9   0   1   62.14    1.88
   8   0  -1   64.18    2.01
  -8   0   1   64.46    1.41
  -8   0   1   70.98    1.91
   7   0  -1   21.48    1.12
  -7   0   1   23.85    1.04
  -7   0   1   22.67    0.64
   6   0  -1    3.60    0.54
  -6   0   1    2.77    0.45
  -6   0   1    3.34    0.26
   5   0  -1    3.10    0.47
  -5   0   1    2.98    0.40
  -5   0   1    2.47    0.23
   4   0  -1    0.07    0.35
  -4   0   1    0.32    0.29
  -4   0   1   -0.10    0.16
   3   0  -1    0.99    0.27
  -3   0   1    0.81    0.25
  -3   0   1    0.70    0.12
   2   0  -1  274.36    5.05
  -2   0   1  272.10    5.01
   1   0  -1   -0.39    0.06
  -1   0   1   -0.48    0.04
  -1   0  -1   -0.05    0.04
  -1   0  -1    0.01    0.06
  -2   0  -1   45.85    0.96
  -2   0  -1   45.93    1.01
   2   0   1   45.88    0.98
  -3   0  -1    0.32    0.19
  -3   0  -1    0.01    0.24
   3   0   1    0.15    0.24
  -4   0  -1    2.09    0.36
  -4   0  -1    2.59    0.30
   4   0   1    3.12    0.41
  -5   0  -1    0.30    0.25
  -5   0  -1    0.44    0.33
   5   0   1    0.74    0.37
  -6   0  -1   81.98    1.74
  -6   0  -1   82.28    2.02
   6   0   1   82.47    2.03
  -7   0  -1   26.45    1.12
  -7   0  -1   26.37    0.81
   7   0   1   30.21    1.19
  -8   0  -1   90.47    2.00
  -8   0  -1  100.05    2.42
   8   0   1   95.31    2.48
  -9   0  -1    9.50    0.56
  -9   0  -1    7.74    0.76
   9   0   1    8.64    0.88
 -10   0  -1   -0.33    0.51
 -10   0  -1    0.04    0.31
  10   0   1    0.87    0.68
 -11   0  -1   23.30    1.43
  11   0   1   21.77    1.59
 -12   0  -1    9.69    1.05
  12   0   1    6.95    1.16
 -13   0  -1   15.67    1.35
  13   0   1   16.91    1.58
 -14   0  -1   -1.46    0.77
  14   0   1   -0.16    1.02
 -15   0  -1   -0.76    0.88
  15   0   1   -1.30    1.07
 -16   0  -1    0.81    1.10
 -17   0  -1   -1.85    1.04
 -18   0  -1   -0.08    1.33
 -18   1   1    2.73    1.36
 -17   1   1   -0.50    1.12
  16  -1  -1    4.96    1.45
 -16   1   1    5.61    1.22
  15  -1  -1   -0.19    1.14
 -15   1   1    0.18    0.91
  14  -1  -1   16.99    1.76
 -14   1   1   18.65    1.49
  13  -1  -1   -0.56    1.09
 -13   1   1   -0.48    0.75
  12  -1  -1    9.18    1.31
 -12   1   1    9.41    1.03
  11  -1  -1    3.15    0.94
 -11   1   1    1.60    0.66
  10  -1  -1    1.93    0.74
 -10   1   1    0.91    0.56
   9  -1  -1    1.59    0.63
  -9   1   1    0.63    0.25
  -9   1   1    0.76    0.50
   8  -1  -1    0.53    0.54
  -8   1   1    0.41    0.43
  -8   1   1    0.25    0.24
   7  -1  -1    9.37    0.81
  -7   1   1    9.73    0.47
  -7   1   1    9.64    0.72
   6  -1  -1    6.53    0.62
  -6   1   1    6.03    0.55
  -6   1   1    6.20    0.39
   5  -1  -1   54.42    1.48
  -5   1   1   50.54    1.13
  -5   1   1   53.23    1.39
   4  -1  -1    1.80    0.39
  -4   1   1    0.76    0.19
  -4   1   1    1.25    0.32
   3  -1  -1    1.42    0.30
  -3   1   1    1.34    0.18
  -3   1   1    1.92    0.28
   2  -1  -1   16.99    0.55
  -2   1   1   17.01    0.52
   1  -1  -1    0.05    0.08
   0  -1  -1    0.03    0.04
  -2  -1  -1    0.13    0.13
   2   1   1    0.21    0.17
  -3  -1  -1   19.40    0.58
  -3  -1  -1   19.46    0.71
   3   1   1   19.65    0.69
  -4  -1  -1    0.24    0.30
  -4  -1  -1    0.31    0.28
   4   1   1   -0.09    0.34
  -5  -1  -1   46.51    1.14
  -5  -1  -1   45.03    1.32
   5   1   1   46.49    1.33
  -6  -1  -1   40.28    1.06
  -6  -1  -1   39.28    1.28
   6   1   1   39.68    1.30
  -7  -1  -1  219.55    4.21
  -7  -1  -1  220.41    4.56
   7   1   1  221.36    4.56
  -8  -1  -1   63.90    1.49
  -8  -1  -1   64.44    1.88
   8   1   1   64.34    1.92
  -9  -1  -1   17.70    1.14
  -9  -1  -1   18.08    0.72
   9   1   1   20.95    1.27
 -10  -1  -1    0.93    0.57
  10   1   1    0.53    0.69
 -11  -1  -1   12.60    1.07
  11   1   1   15.74    1.29
 -12  -1  -1   -0.27    0.71
  12   1   1    1.26    0.91
 -13  -1  -1   -1.71    0.70
  13   1   1   -0.55    0.92
 -14  -1  -1   13.14    1.32
  14   1   1   12.03    1.40
 -15  -1  -1    3.09    1.10
 -16  -1  -1   24.68    2.00
 -17  -1  -1   -0.14    1.20
 -18  -1  -1    3.50    1.47
 -18   2   1   -0.26    1.23
 -17   2   1    2.70    1.26
  16  -2  -1    0.98    1.32
 -16   2   1    0.25    1.09
  15  -2  -1   -0.52    1.22
 -15   2   1    1.62    0.98
  14  -2  -1    0.82    1.26
 -14   2   1    3.31    0.95
  13  -2  -1    1.16    1.18
 -13   2   1    4.39    0.93
  12  -2  -1   -0.95    0.94
 -12   2   1    0.32    0.68
  11  -2  -1    7.23    1.08
 -11   2   1    8.46    0.92
  10  -2  -1    1.47    0.75
 -10   2   1    2.78    0.62
   9  -2  -1   25.09    1.37
  -9   2   1   23.38    1.19
  -9   2   1   21.53    0.77
   8  -2  -1   19.71    1.19
  -8   2   1   17.19    0.99
  -8   2   1   15.78    0.65
   7  -2  -1   31.65    1.29
  -7   2   1   28.98    1.14
  -7   2   1   29.50    0.86
   6  -2  -1   25.88    1.10
  -6   2   1   23.11    0.73
  -6   2   1   26.07    1.02
   5  -2  -1   20.12    0.94
  -5   2   1   18.38    0.62
  -5   2   1   20.99    0.84
   4  -2  -1   10.92    0.70
  -4   2   1   11.01    0.62
   3  -2  -1   11.68    0.61
  -3   2   1   12.35    0.57
   2  -2  -1    0.15    0.22
   1  -2  -1    0.70    0.19
   0  -2  -1    6.45    0.34
   1   2   1    1.57    0.23
   2   2   1   16.16    0.58
  -3  -2  -1   -0.26    0.19
   3   2   1    0.08    0.27
  -4  -2  -1    0.75    0.32
  -4  -2  -1    1.05    0.26
   4   2   1    0.29    0.31
  -5  -2  -1    6.42    0.48
  -5  -2  -1    5.08    0.51
   5   2   1    5.10    0.52
  -6  -2  -1  129.77    2.89
  -6  -2  -1  127.74    2.64
   6   2   1  127.59    2.83
  -7  -2  -1   37.96    1.09
  -7  -2  -1   36.09    1.31
   7   2   1   36.21    1.33
  -8  -2  -1   84.81    2.23
  -8  -2  -1   78.47    1.85
   8   2   1   81.71    2.20
  -9  -2  -1    2.39    0.41
  -9  -2  -1    2.53    0.58
   9   2   1    2.79    0.64
 -10  -2  -1    1.67    0.65
  10   2   1    1.45    0.69
 -11  -2  -1    4.52    0.82
  11   2   1    4.75    0.92
 -12  -2  -1   -0.01    0.71
  12   2   1    0.31    0.80
 -13  -2  -1   24.29    1.79
  13   2   1   27.81    1.80
 -14  -2  -1   15.06    1.52
  14   2   1   19.38    1.63
 -15  -2  -1   60.53    2.67
 -16  -2  -1    4.24    1.28
 -17  -2  -1    0.66    1.23
 -18  -2  -1   -2.59    1.25
 -18   3   1   -0.59    1.20
  17  -3  -1    0.07    1.40
 -17   3   1   -0.31    1.14
  16  -3  -1    5.19    1.57
 -16   3   1    5.12    1.20
  15  -3  -1    3.69    1.44
 -15   3   1    6.28    1.15
  14  -3  -1   90.86    3.42
 -14   3   1   96.66    3.10
  13  -3  -1   12.60    1.58
 -13   3   1   15.35    1.33
  12  -3  -1   19.80    1.62
 -12   3   1   21.15    1.55
  11  -3  -1    1.11    0.87
 -11   3   1    0.70    0.67
  10  -3  -1    3.56    0.80
 -10   3   1    4.99    0.73
   9  -3  -1    3.73    0.76
  -9   3   1    4.02    0.65
   8  -3  -1    1.52    0.57
  -8   3   1    1.12    0.49
   7  -3  -1    0.86    0.50
  -7   3   1    0.53    0.41
   6  -3  -1    2.99    0.56
  -6   3   1    4.23    0.52
   5  -3  -1    5.73    0.58
  -5   3   1    5.42    0.50
   4  -3  -1    2.63    0.43
  -4   3   1    1.97    0.36
   3  -3  -1   33.82    1.07
   2  -3  -1    0.66    0.29
   1  -3  -1   43.47    1.14
   0  -3  -1   -0.12    0.24
   1   3   1   80.29    1.75
   2   3   1    2.62    0.37
   3   3   1   33.84    1.02
  -4  -3  -1    2.99    0.40
  -4  -3  -1    3.29    0.36
   4   3   1    3.43    0.44
  -5  -3  -1   10.67    0.57
  -5  -3  -1    9.11    0.66
   5   3   1   10.36    0.72
  -6  -3  -1    0.26    0.39
  -6  -3  -1   -0.10    0.30
   6   3   1    0.45    0.42
  -7  -3  -1    1.56    0.39
  -7  -3  -1    1.66    0.48
   7   3   1    2.12    0.52
  -8  -3  -1    0.95    0.49
  -8  -3  -1    0.24    0.39
   8   3   1   -0.35    0.48
  -9  -3  -1    5.06    0.73
  -9  -3  -1    4.46    0.54
   9   3   1    6.17    0.78
 -10  -3  -1   13.04    1.09
  10   3   1   12.77    1.08
 -11  -3  -1    6.45    0.92
  11   3   1    7.63    1.01
 -12  -3  -1    1.12    0.81
  12   3   1    2.31    0.89
 -13  -3  -1    2.79    0.95
  13   3   1    3.14    1.02
 -14  -3  -1   34.96    2.17
  14   3   1   33.08    2.22
 -15  -3  -1    4.96    1.28
 -16  -3  -1   15.14    1.76
 -17  -3  -1   -1.40    1.16
 -18   4   1    1.60    1.28
  17  -4  -1    0.57    1.50
 -17   4   1    0.12    1.17
  16  -4  -1    1.42    1.41
 -16   4   1    1.24    1.12
  15  -4  -1   77.82    3.33
 -15   4   1   81.68    2.98
  14  -4  -1   11.88    1.60
 -14   4   1   12.19    1.32
  13  -4  -1   57.28    2.73
 -13   4   1   60.64    2.38
  12  -4  -1    1.47    0.99
 -12   4   1    0.33    0.75
  11  -4  -1   -0.39    0.80
 -11   4   1    0.03    0.65
  10  -4  -1    2.03    0.78
 -10   4   1    2.44    0.65
   9  -4  -1   -0.49    0.55
  -9   4   1   -0.27    0.46
   8  -4  -1   14.92    1.10
  -8   4   1   14.64    0.96
   7  -4  -1   29.35    1.31
  -7   4   1   29.78    1.18
   6  -4  -1  121.57    2.87
  -6   4   1  121.68    2.73
   5  -4  -1   11.23    0.82
   4  -4  -1    4.44    0.52
   3  -4  -1    9.93    0.70
   2  -4  -1   42.84    1.26
   1  -4  -1    0.30    0.30
   0  -4  -1  505.01    9.39
   1   4   1    2.00    0.41
   2   4   1   35.49    1.11
   3   4   1    3.36    0.47
   4   4   1   13.58    0.77
  -5  -4  -1    3.76    0.42
  -5  -4  -1    3.46    0.50
   5   4   1    3.78    0.54
  -6  -4  -1   18.73    0.79
  -6  -4  -1   19.14    1.02
   6   4   1   19.15    0.99
  -7  -4  -1    1.66    0.40
  -7  -4  -1    2.58    0.53
   7   4   1    1.23    0.51
  -8  -4  -1    0.74    0.50
  -8  -4  -1    0.66    0.38
   8   4   1   -0.14    0.50
  -9  -4  -1    1.86    0.61
  -9  -4  -1    1.66    0.48
   9   4   1    2.71    0.67
 -10  -4  -1    3.24    0.76
  10   4   1    3.74    0.80
 -11  -4  -1    3.38    0.83
  11   4   1    5.16    0.94
 -12  -4  -1   -0.35    0.77
  12   4   1    0.70    0.84
 -13  -4  -1    2.00    0.99
  13   4   1    4.61    1.07
 -14  -4  -1    3.07    1.13
 -15  -4  -1    1.43    1.19
 -16  -4  -1   -0.19    1.21
 -17  -4  -1   -0.01    1.35
 -18   5   1    9.78    1.68
  17  -5  -1   -1.86    1.51
 -17   5   1   -1.04    1.09
  16  -5  -1    1.29    1.44
 -16   5   1    5.09    1.28
  15  -5  -1    2.41    1.34
 -15   5   1    4.22    1.12
  14  -5  -1   44.42    2.60
 -14   5   1   46.02    2.18
  13  -5  -1    1.94    1.09
 -13   5   1    3.59    0.99
  12  -5  -1    0.04    0.91
 -12   5   1   -0.73    0.75
  11  -5  -1    6.63    1.06
 -11   5   1    6.00    0.90
  10  -5  -1   -0.20    0.70
 -10   5   1   -0.44    0.56
   9  -5  -1    3.43    0.75
  -9   5   1    3.03    0.63
   8  -5  -1   49.87    1.84
  -8   5   1   49.21    1.64
   7  -5  -1  153.81    3.58
   6  -5  -1   80.95    2.21
   5  -5  -1   92.19    2.34
   4  -5  -1    4.27    0.58
   3  -5  -1    4.65    0.55
   2  -5  -1    0.82    0.41
   1  -5  -1   27.20    1.07
   0  -5  -1    0.48    0.38
   1   5   1   28.47    1.05
   2   5   1    0.78    0.41
   3   5   1   36.62    1.23
   4   5   1    6.07    0.61
   5   5   1   30.67    1.20
  -6  -5  -1   19.33    0.84
  -6  -5  -1   18.23    1.03
   6   5   1   16.49    0.97
  -7  -5  -1    4.35    0.64
  -7  -5  -1    5.63    0.55
   7   5   1    4.29    0.66
  -8  -5  -1   -0.26    0.51
  -8  -5  -1    0.09    0.39
   8   5   1    0.02    0.50
  -9  -5  -1    1.02    0.67
  -9  -5  -1    0.98    0.53
   9   5   1    1.71    0.69
 -10  -5  -1    0.20    0.70
  10   5   1    1.94    0.75
 -11  -5  -1    1.03    0.80
  11   5   1    1.33    0.84
 -12  -5  -1    7.93    1.16
  12   5   1   10.95    1.25
 -13  -5  -1    6.66    1.24
  13   5   1    9.43    1.31
 -14  -5  -1   13.99    1.60
 -15  -5  -1   -0.93    1.07
 -16  -5  -1   -0.26    1.24
 -17  -5  -1    1.16    1.35
  18  -6  -1   -0.97    1.94
  17  -6  -1    7.03    1.75
 -17   6   1    4.69    1.40
  16  -6  -1    1.05    1.45
 -16   6   1   -0.24    1.06
  15  -6  -1   -0.20    1.21
 -15   6   1   -0.46    0.98
  14  -6  -1    2.07    1.27
 -14   6   1    1.36    0.90
  13  -6  -1    0.77    1.08
 -13   6   1    0.35    0.80
  12  -6  -1    4.42    1.12
 -12   6   1    4.97    0.95
  11  -6  -1   20.89    1.66
 -11   6   1   17.41    1.28
  10  -6  -1   13.20    1.24
   9  -6  -1   -0.13    0.63
   8  -6  -1    8.22    0.90
   7  -6  -1   16.73    1.17
   6  -6  -1   62.30    1.92
   5  -6  -1    1.03    0.50
   4  -6  -1    8.08    0.75
   3  -6  -1    2.88    0.53
   2  -6  -1    0.39    0.41
   1  -6  -1    0.27    0.42
   0  -6  -1  226.03    4.71
   1   6   1    5.87    0.65
   2   6   1  247.44    5.03
   3   6   1   16.40    0.97
   4   6   1    0.63    0.45
   5   6   1   -0.13    0.43
  -6  -6  -1    0.09    0.44
   6   6   1    0.01    0.46
  -7  -6  -1   11.49    0.82
  -7  -6  -1    9.71    0.86
   7   6   1   12.05    0.98
  -8  -6  -1   32.00    1.24
  -8  -6  -1   36.49    1.55
   8   6   1   34.10    1.47
  -9  -6  -1   34.62    1.65
   9   6   1   39.04    1.67
 -10  -6  -1   13.75    1.20
  10   6   1   14.14    1.21
 -11  -6  -1    9.28    1.15
  11   6   1    8.09    1.10
 -12  -6  -1    0.73    0.91
  12   6   1    2.41    0.95
 -13  -6  -1   14.03    1.56
  13   6   1   15.54    1.66
 -14  -6  -1   -0.12    1.05
 -15  -6  -1    0.23    1.21
 -16  -6  -1    1.11    1.41
 -17  -6  -1    3.75    1.55
  17  -7  -1   -0.85    1.48
  16  -7  -1    4.11    1.62
  15  -7  -1   -0.85    1.25
  14  -7  -1    1.83    1.20
  13  -7  -1   -0.82    1.01
  12  -7  -1    3.85    1.15
  11  -7  -1    2.85    0.95
  10  -7  -1    9.24    1.16
   9  -7  -1    5.12    0.88
   8  -7  -1    0.07    0.62
   7  -7  -1    5.91    0.80
   6  -7  -1    4.89    0.72
   5  -7  -1    1.44    0.53
   4  -7  -1    0.39    0.45
   3  -7  -1   30.74    1.31
   2  -7  -1    0.50    0.44
   1  -7  -1    5.57    0.68
   0  -7  -1   -0.42    0.42
   1   7   1  109.95    2.73
   2   7   1    0.81    0.49
   3   7   1   16.08    1.05
   4   7   1    5.53    0.71
   5   7   1    2.56    0.59
  -6  -7  -1    0.95    0.49
   6   7   1    0.70    0.55
  -7  -7  -1   16.62    1.18
   7   7   1   17.35    1.18
  -8  -7  -1   28.34    1.50
  -8  -7  -1   27.83    1.24
   8   7   1   30.00    1.46
  -9  -7  -1   40.65    1.83
   9   7   1   42.14    1.82
 -10  -7  -1   35.57    1.88
  10   7   1   31.65    1.72
 -11  -7  -1    4.62    0.99
  11   7   1    3.88    0.95
 -12  -7  -1    2.64    1.03
  12   7   1    2.52    0.97
 -13  -7  -1    3.22    1.14
 -14  -7  -1    0.75    1.19
 -15  -7  -1   -1.85    1.26
 -16  -7  -1   13.30    1.86
  17  -8  -1   -2.76    1.37
  16  -8  -1    0.16    1.40
  15  -8  -1    0.33    1.34
  14  -8  -1   -1.20    1.18
  13  -8  -1   -0.21    1.05
  12  -8  -1    3.45    1.13
  11  -8  -1   -0.30    0.92
  10  -8  -1    6.16    1.02
   9  -8  -1   10.47    1.10
   8  -8  -1   30.53    1.64
   7  -8  -1    3.48    0.73
   6  -8  -1    3.43    0.70
   5  -8  -1    2.20    0.58
   4  -8  -1   26.28    1.34
   3  -8  -1    0.95    0.52
   2  -8  -1   38.30    1.53
   1  -8  -1   -0.01    0.48
   0  -8  -1    0.94    0.54
   2   8   1   -0.09    0.49
   3   8   1   -0.07    0.49
   4   8   1   28.68    1.37
   5   8   1    0.51    0.56
   6   8   1    0.90    0.61
  -7  -8  -1    8.77    0.94
   7   8   1   10.73    1.04
  -8  -8  -1   21.54    1.42
  -8  -8  -1   19.21    1.21
   8   8   1   21.96    1.50
  -9  -8  -1   21.57    1.53
   9   8   1   19.75    1.53
 -10  -8  -1    7.50    1.05
  10   8   1    8.18    1.13
 -11  -8  -1    2.40    0.97
  11   8   1    1.23    0.88
 -12  -8  -1   -1.19    0.91
  12   8   1   -0.55    0.88
 -13  -8  -1    1.27    1.17
 -14  -8  -1   -0.87    1.18
 -15  -8  -1   14.74    1.90
 -16  -8  -1   -0.10    1.45
  17  -9  -1   -0.58    1.60
  16  -9  -1   -1.62    1.39
  15  -9  -1    0.48    1.38
  14  -9  -1    5.51    1.44
  13  -9  -1    9.57    1.53
  12  -9  -1   23.32    1.89
  11  -9  -1   13.73    1.47
  10  -9  -1    1.55    0.88
   9  -9  -1    2.75    0.84
   8  -9  -1    4.58    0.88
   7  -9  -1    1.61    0.65
   6  -9  -1   -0.02    0.59
   5  -9  -1   22.73    1.35
   4  -9  -1    0.78    0.53
   3  -9  -1    6.55    0.80
   2  -9  -1    0.52    0.52
   1  -9  -1   18.31    1.23
   0  -9  -1    4.35    0.74
   2   9   1    1.74    0.62
   3   9   1    5.99    0.80
   4   9   1   10.81    1.00
   5   9   1    4.94    0.83
   6   9   1    2.99    0.79
  -7  -9  -1   -0.49    0.60
   7   9   1   -0.04    0.69
  -8  -9  -1   -0.13    0.60
  -8  -9  -1   -1.11    0.68
   8   9   1    0.30    0.75
  -9  -9  -1    0.34    0.74
   9   9   1   -0.48    0.79
 -10  -9  -1    0.88    0.86
  10   9   1    1.27    0.89
 -11  -9  -1    0.45    0.94
  11   9   1    0.88    0.92
 -12  -9  -1   11.49    1.50
 -13  -9  -1    0.34    1.13
 -14  -9  -1    1.91    1.36
 -15  -9  -1    0.73    1.38
  16 -10  -1   -0.14    1.45
  15 -10  -1    3.09    1.59
  14 -10  -1    1.52    1.39
  13 -10  -1   60.04    2.88
  12 -10  -1   26.55    2.14
  11 -10  -1   22.77    1.87
  10 -10  -1   -0.10    0.89
   9 -10  -1   -0.16    0.73
   8 -10  -1    7.11    0.98
   7 -10  -1    0.95    0.75
   6 -10  -1   28.18    1.61
   5 -10  -1    7.32    0.97
   4 -10  -1   88.15    2.72
   3 -10  -1    0.59    0.59
   2 -10  -1    3.43    0.76
   1 -10  -1   -0.61    0.52
   0 -10  -1   27.63    1.50
  -1 -10  -1    0.49    0.60
   2  10   1    0.83    0.62
   3  10   1    5.47    0.88
   4  10   1    1.50    0.74
   5  10   1    1.21    0.71
   6  10   1    4.73    0.92
  -7 -10  -1    3.86    0.81
   7  10   1    2.98    0.91
  -8 -10  -1    4.00    0.90
   8  10   1    5.10    1.03
  -9 -10  -1    3.16    0.92
   9  10   1    2.81    0.96
 -10 -10  -1   -1.41    0.83
  10  10   1   -0.57    0.83
 -11 -10  -1    2.46    1.10
  11  10   1    2.52    1.04
 -12 -10  -1    1.22    1.12
 -13 -10  -1    0.11    1.17
 -14 -10  -1    0.14    1.30
  16 -11  -1    4.47    1.76
  15 -11  -1   -2.16    1.29
  14 -11  -1    0.44    1.33
  13 -11  -1    0.97    1.21
  12 -11  -1    7.61    1.37
  11 -11  -1    0.73    1.01
  10 -11  -1    0.70    0.91
   9 -11  -1    7.46    1.19
   8 -11  -1    0.09    0.73
   7 -11  -1   12.01    1.23
   6 -11  -1    5.11    0.92
   5 -11  -1  129.60    3.63
   4 -11  -1    3.58    0.86
   3 -11  -1   45.16    2.00
   2 -11  -1    0.37    0.63
   1 -11  -1   15.28    1.35
   0 -11  -1    1.44    0.76
  -1 -11  -1   14.24    1.28
   3  11   1  128.11    3.50
   4  11   1   12.37    1.23
   5  11   1   13.11    1.28
   6  11   1    4.13    1.00
  -7 -11  -1   10.88    1.10
   7  11   1   11.08    1.28
  -8 -11  -1   11.69    1.17
   8  11   1    9.59    1.28
  -9 -11  -1    0.60    0.83
   9  11   1    0.10    0.91
 -10 -11  -1    3.56    1.11
  10  11   1    4.47    1.13
 -11 -11  -1    2.88    1.23
  11  11   1    2.53    1.12
 -12 -11  -1   -0.05    1.15
 -13 -11  -1   -1.75    1.18
 -14 -11  -1    4.35    1.58
  15 -12  -1   -1.14    1.43
  14 -12  -1   -2.06    1.22
  13 -12  -1   -0.01    1.22
  12 -12  -1   -2.32    1.01
  11 -12  -1    2.91    1.17
  10 -12  -1   13.75    1.48
   9 -12  -1    6.43    1.15
   8 -12  -1    3.28    1.01
   7 -12  -1    1.98    0.86
   6 -12  -1   12.74    1.33
   5 -12  -1    4.56    0.97
   4 -12  -1   22.95    1.64
   3 -12  -1   -0.25    0.66
   2 -12  -1   25.24    1.68
   1 -12  -1    0.30    0.73
   0 -12  -1    1.99    0.82
  -1 -12  -1    2.77    0.90
  -2 -12  -1   86.54    2.99
   4  12   1   40.83    2.07
   5  12   1    3.55    1.00
   6  12   1    8.97    1.25
  -7 -12  -1    9.90    1.11
   7  12   1    6.49    1.17
  -8 -12  -1    1.45    0.87
   8  12   1    1.71    0.98
  -9 -12  -1   17.67    1.60
   9  12   1   16.04    1.63
 -10 -12  -1   11.51    1.43
  10  12   1   10.15    1.43
 -11 -12  -1   39.53    2.49
 -12 -12  -1    0.26    1.23
 -13 -12  -1    0.02    1.27
  15 -13  -1   -1.58    1.47
  14 -13  -1    0.74    1.45
  13 -13  -1    0.70    1.31
  12 -13  -1   -0.10    1.21
  11 -13  -1   -0.75    1.05
  10 -13  -1    3.02    1.19
   9 -13  -1    2.20    1.01
   8 -13  -1    0.94    0.96
   7 -13  -1   -0.10    0.84
   6 -13  -1    0.53    0.77
   5 -13  -1   -0.46    0.72
   4 -13  -1    0.27    0.79
   3 -13  -1   15.02    1.50
   2 -13  -1    1.36    0.84
   1 -13  -1    8.96    1.23
   0 -13  -1    0.25    0.85
  -1 -13  -1   47.46    2.32
  -2 -13  -1    5.95    1.16
   4  13   1    3.74    1.08
   5  13   1    0.01    0.90
   6  13   1    7.85    1.27
  -7 -13  -1    4.22    0.98
   7  13   1    2.76    1.15
  -8 -13  -1    0.96    0.94
   8  13   1   -0.97    0.99
  -9 -13  -1   14.11    1.56
   9  13   1   14.50    1.61
 -10 -13  -1   59.23    2.88
  10  13   1   54.82    2.88
 -11 -13  -1   12.28    1.70
 -12 -13  -1    5.72    1.52
  14 -14  -1   -1.40    1.44
  13 -14  -1   -1.71    1.28
  12 -14  -1    0.02    1.30
  11 -14  -1    3.48    1.38
  10 -14  -1    4.85    1.38
   9 -14  -1    0.75    1.04
   8 -14  -1   -0.23    0.92
   7 -14  -1    0.20    0.89
   6 -14  -1   12.58    1.48
   5 -14  -1   -0.91    0.78
   4 -14  -1    6.53    1.18
   3 -14  -1   -0.04    0.83
   2 -14  -1    8.95    1.32
   1 -14  -1    0.87    0.91
   0 -14  -1    1.47    1.00
  -1 -14  -1   -0.57    0.95
  -2 -14  -1    1.67    1.06
  -3 -14  -1    2.83    1.13
   5  14   1    2.97    1.11
   6  14   1   10.08    1.47
   7  14   1    5.86    1.34
   8  14   1    0.66    1.13
   9  14   1   11.13    1.63
  13 -15  -1    0.40    1.43
  12 -15  -1    6.81    1.61
  11 -15  -1   31.78    2.52
  10 -15  -1   14.61    1.86
   9 -15  -1   10.94    1.58
   8 -15  -1   -1.54    1.01
   7 -15  -1    8.66    1.36
   6 -15  -1    0.39    0.99
   5 -15  -1    0.21    0.91
   4 -15  -1    0.22    0.95
   3 -15  -1   12.55    1.61
   2 -15  -1    0.00    0.98
   1 -15  -1   11.36    1.54
   0 -15  -1    0.53    1.02
  -1 -15  -1    8.68    1.48
  -2 -15  -1    3.12    1.23
  -3 -15  -1    8.86    1.52
  -4 -15  -1    0.55    1.12
   6  15   1    0.48    1.12
   7  15   1   -0.72    1.06
   8  15   1    0.93    1.20
   9  15   1   -0.26    1.19
  12 -16  -1   12.84    2.01
  11 -16  -1   23.71    2.33
  10 -16  -1   33.18    2.74
   9 -16  -1    3.52    1.41
   8 -16  -1    0.81    1.18
   7 -16  -1    0.06    1.05
   6 -16  -1   -0.05    1.06
   5 -16  -1    1.96    1.16
   4 -16  -1   62.14    3.14
   3 -16  -1    0.62    1.14
   2 -16  -1   50.00    2.83
   1 -16  -1    0.83    1.09
   0 -16  -1    1.18    1.22
  -1 -16  -1    2.45    1.30
  -2 -16  -1    2.96    1.35
  -3 -16  -1   -1.05    1.08
  -4 -16  -1    6.36    1.51
  -5 -16  -1    4.53    1.52
   8  16   1    0.63    1.27
   9  16   1    6.66    1.81
  10 -17  -1    0.13    1.35
   9 -17  -1   -1.48    1.24
   8 -17  -1    1.52    1.27
   7 -17  -1   14.87    1.85
   6 -17  -1   -0.44    1.12
   5 -17  -1   19.26    2.07
   4 -17  -1   -2.47    1.10
   3 -17  -1   67.03    3.30
   2 -17  -1    1.13    1.36
   1 -17  -1   -0.73    1.24
   0 -17  -1    1.03    1.29
  -1 -17  -1    0.99    1.37
  -2 -17  -1    1.21    1.45
  -3 -17  -1   14.34    1.92
  -4 -17  -1   16.96    2.15
  -5 -17  -1   24.68    2.42
  -6 -17  -1   12.14    2.08
   9 -18  -1   -0.50    1.40
   8 -18  -1    7.72    1.73
   7 -18  -1    1.94    1.38
   6 -18  -1    2.01    1.32
   5 -18  -1   -2.03    1.24
   4 -18  -1   16.91    2.02
   3 -18  -1    0.63    1.37
   2 -18  -1    8.41    1.74
   1 -18  -1    1.28    1.44
   0 -18  -1   13.31    2.06
  -1 -18  -1    2.35    1.56
  -2 -18  -1    3.13    1.58
  -3 -18  -1    5.75    1.83
  -4 -18  -1   25.12    2.73
  -5 -18  -1   12.08    2.11
   6 -19  -1   -0.08    1.38
   5 -19  -1    4.56    1.67
   4 -19  -1    0.16    1.38
   3 -19  -1   -1.47    1.30
   2 -19  -1   -0.76    1.41
   1 -19  -1    8.51    1.95
   0 -19  -1   -1.28    1.48
  -1 -19  -1    3.15    1.72
  -2 -19  -1    0.58    1.56
  -3 -19  -1    2.34    1.65
  -3 -19   2    3.33    1.68
  -2 -19   2    2.16    1.80
  -1 -19   2   -0.50    1.53
   0 -19   2    2.11    1.58
   1 -19   2   -0.42    1.41
   2 -19   2    1.61    1.53
   3 -19   2   -0.16    1.47
   4 -19   2   -2.04    1.29
   5 -19   2    6.49    1.69
   6 -19   2   -0.78    1.35
  -5 -18   2   23.37    2.55
  -4 -18   2    1.23    1.61
  -3 -18   2   -0.26    1.39
  -2 -18   2    1.37    1.52
  -1 -18   2    4.24    1.66
   0 -18   2    1.05    1.44
   1 -18   2    0.66    1.43
   2 -18   2    5.47    1.67
   3 -18   2    1.50    1.42
   4 -18   2   -1.64    1.20
   5 -18   2    0.88    1.32
   6 -18   2   13.01    1.95
   7 -18   2    1.32    1.38
   8 -18   2   -0.90    1.25
   9 -18   2   -0.73    1.50
   7  17  -2    3.28    1.49
  -4 -17   2    4.86    1.64
  -3 -17   2   -1.29    1.33
  -2 -17   2    2.66    1.39
  -1 -17   2   -2.87    1.15
   0 -17   2   10.33    1.78
   1 -17   2   23.78    2.32
   2 -17   2   18.99    2.14
   3 -17   2   39.47    2.90
   4 -17   2    5.39    1.48
   5 -17   2    3.57    1.42
   6 -17   2    0.98    1.26
   7 -17   2    2.08    1.36
   8 -17   2    0.46    1.24
   9 -17   2   15.86    2.06
  10 -17   2   -0.32    1.34
   9  16  -2    2.44    1.44
   8  16  -2    1.19    1.36
   7  16  -2    4.19    1.40
   6  16  -2    0.43    1.18
   5  16  -2    3.82    1.33
  -3 -16   2    8.06    1.65
  -2 -16   2    7.47    1.57
  -1 -16   2    0.05    1.14
   0 -16   2   13.08    1.79
   1 -16   2    9.63    1.63
   2 -16   2   33.96    2.55
   3 -16   2    2.25    1.22
   4 -16   2    8.10    1.44
   5 -16   2    0.42    1.08
   6 -16   2    5.32    1.32
   7 -16   2    1.00    1.13
   8 -16   2   28.50    2.34
   9 -16   2    2.20    1.35
  10 -16   2   56.56    3.21
  11 -16   2    1.45    1.40
  12 -16   2    0.39    1.40
  10  15  -2    4.00    1.45
   9  15  -2    1.02    1.25
   8  15  -2    4.77    1.46
   7  15  -2    0.28    1.16
   6  15  -2    2.91    1.21
   5  15  -2   -1.34    1.02
   4  15  -2    8.64    1.44
  -2 -15   2    7.93    1.44
  -1 -15   2    0.69    1.03
   0 -15   2    2.10    1.11
   1 -15   2    7.29    1.39
   2 -15   2    1.82    1.05
   3 -15   2   -0.59    0.90
   4 -15   2   -0.23    0.90
   5 -15   2   12.33    1.60
   6 -15   2   -1.17    0.88
   7 -15   2    3.12    1.13
   8 -15   2    0.11    1.06
   9 -15   2   61.61    3.16
  10 -15   2    0.04    1.18
  11 -15   2   10.10    1.72
  12 -15   2    0.09    1.33
  13 -15   2    3.25    1.56
  11  14  -2   21.51    2.18
  10  14  -2    2.01    1.29
   9  14  -2    0.21    1.14
   8  14  -2    2.10    1.22
   7  14  -2   11.54    1.57
   6  14  -2    0.46    1.00
   5  14  -2    0.12    0.99
   4  14  -2   -0.94    0.93
  -2 -14   2    3.75    1.12
  -1 -14   2    1.33    1.05
   0 -14   2    0.74    0.96
   1 -14   2    2.57    1.03
   2 -14   2    5.90    1.21
   3 -14   2    1.89    0.98
   4 -14   2   24.44    1.99
   5 -14   2    1.86    0.98
   6 -14   2    7.02    1.21
   7 -14   2    0.21    0.89
   8 -14   2    5.02    1.20
   9 -14   2    0.13    1.07
  10 -14   2    0.35    1.15
  11 -14   2   -0.13    1.18
  12 -14   2    2.21    1.40
  13 -14   2    1.73    1.39
  14 -14   2   -0.34    1.43
  12  13  -2   38.48    3.13
  11  13  -2    1.94    1.28
  10  13  -2   29.76    2.34
   9  13  -2   -0.83    1.04
   8  13  -2   15.82    1.65
   7  13  -2    0.29    0.96
   6  13  -2    2.09    1.03
   5  13  -2   14.43    1.54
   4  13  -2   35.97    2.15
   3  13  -2   19.51    1.67
  -1 -13   2    0.23    0.84
   0 -13   2    8.52    1.27
   1 -13   2   15.20    1.51
   2 -13   2    0.66    0.78
   3 -13   2    1.52    0.84
   4 -13   2    0.34    0.80
   5 -13   2    1.21    0.83
   6 -13   2   -0.06    0.75
   7 -13   2    1.71    0.89
   8 -13   2    0.62    0.93
   9 -13   2    7.70    1.29
  10 -13   2   -0.90    0.93
  11 -13   2    6.12    1.39
  12 -13   2    2.42    1.31
  13 -13   2    2.72    1.45
  14 -13   2   -1.48    1.37
  15 -13   2    0.38    1.56
 -13 -12   2   27.74    2.80
  12  12  -2    0.18    1.21
 -12 -12   2   -1.81    1.09
  11  12  -2   16.79    1.82
 -11 -12   2   16.59    1.72
  10  12  -2    0.99    1.11
 -10 -12   2   -0.03    0.97
   9  12  -2   -0.12    1.00
  -9 -12   2    2.71    0.92
   8  12  -2    4.57    1.18
  -8 -12   2    3.12    0.88
   7  12  -2    0.85    0.94
  -7 -12   2    2.01    0.81
   6  12  -2    5.42    1.11
  -6 -12   2    4.19    0.83
   5  12  -2  101.39    3.27
   4  12  -2   54.10    2.35
   3  12  -2   52.74    2.27
   2  12  -2    3.28    0.96
   0 -12   2   19.13    1.55
   1 -12   2    2.73    0.87
   2 -12   2    0.24    0.71
   3 -12   2    4.96    0.96
   4 -12   2   59.67    2.44
   5 -12   2    0.06    0.72
   6 -12   2   -0.45    0.70
   7 -12   2    0.49    0.80
   8 -12   2   30.43    1.97
   9 -12   2   -0.98    0.85
  10 -12   2    8.30    1.32
  11 -12   2   -0.21    1.02
  12 -12   2   -1.00    1.07
  13 -12   2   -2.69    1.11
  14 -12   2    1.71    1.46
  15 -12   2   -0.75    1.41
 -14 -11   2   -0.47    1.35
 -13 -11   2    0.60    1.26
  12  11  -2    0.47    1.17
 -12 -11   2   -1.43    1.13
  11  11  -2    0.24    1.10
 -11 -11   2    1.25    1.02
  10  11  -2    7.11    1.31
 -10 -11   2    7.54    1.28
   9  11  -2    0.72    0.97
  -9 -11   2    0.84    0.81
   8  11  -2   26.53    1.93
  -8 -11   2   26.03    1.66
   7  11  -2    0.13    0.86
  -7 -11   2   -0.29    0.69
   6  11  -2   21.03    1.61
  -6 -11   2   20.85    1.37
   5  11  -2   37.69    1.95
   4  11  -2   57.75    2.29
   3  11  -2   29.78    1.72
   2  11  -2   -0.01    0.65
   0 -11   2    9.14    1.09
   1 -11   2    5.23    0.90
   2 -11   2   17.96    1.44
   3 -11   2  267.91    6.11
   4 -11   2    8.41    1.10
   5 -11   2   73.17    2.58
   6 -11   2    0.16    0.70
   7 -11   2    3.91    0.92
   8 -11   2    0.26    0.78
   9 -11   2    1.72    0.92
  10 -11   2    1.80    1.00
  11 -11   2   41.33    2.34
  12 -11   2    6.80    1.37
  13 -11   2    3.55    1.39
  14 -11   2   -2.01    1.20
  15 -11   2    1.23    1.51
  16 -11   2    2.58    1.70
 -15 -10   2   -2.41    1.23
 -14 -10   2   -1.14    1.18
  13  10  -2    1.90    1.26
 -13 -10   2    0.37    1.20
  12  10  -2    0.13    1.09
 -12 -10   2   -1.43    1.03
  11  10  -2    6.15    1.28
 -11 -10   2    5.01    1.17
  10  10  -2   -0.70    0.96
 -10 -10   2   -0.31    0.83
   9  10  -2   14.64    1.49
  -9 -10   2   13.93    1.28
   8  10  -2    1.84    0.93
  -8 -10   2    1.25    0.75
   7  10  -2   -0.08    0.75
  -7 -10   2    1.26    0.68
   6  10  -2    1.12    0.74
  -6 -10   2    0.47    0.58
   5  10  -2    7.21    1.00
   4  10  -2    0.58    0.71
   3  10  -2   -0.58    0.59
   2  10  -2   13.30    1.17
   1  10  -2    7.58    0.94
   0 -10   2   21.08    1.40
   1 -10   2    0.89    0.60
   2 -10   2   81.03    2.58
   3 -10   2   14.19    1.22
   4 -10   2   92.39    2.82
   5 -10   2    1.00    0.64
   6 -10   2    2.80    0.77
   7 -10   2   -0.76    0.60
   8 -10   2    2.00    0.79
   9 -10   2    4.36    0.97
  10 -10   2   81.32    2.97
  11 -10   2   26.69    2.05
  12 -10   2   54.41    2.65
  13 -10   2    3.75    1.30
  14 -10   2    0.43    1.22
  15 -10   2    1.37    1.41
  16 -10   2    0.34    1.50
 -15  -9   2    0.22    1.27
 -14  -9   2    5.32    1.48
  13   9  -2    0.77    1.11
 -13  -9   2   -1.01    1.04
  12   9  -2   10.29    1.41
 -12  -9   2    6.39    1.28
  11   9  -2   -0.14    0.94
 -11  -9   2   -0.10    0.92
  10   9  -2    0.42    0.91
 -10  -9   2    0.18    0.85
   9   9  -2    0.23    0.86
  -9  -9   2   -0.20    0.74
   8   9  -2    3.83    0.96
  -8  -9   2    5.00    0.82
   7   9  -2    0.21    0.74
  -7  -9   2    0.03    0.59
   6   9  -2   14.59    1.22
  -6  -9   2   14.95    1.09
   5   9  -2    5.63    0.87
  -5  -9   2    5.76    0.69
   4   9  -2   33.90    1.62
   3   9  -2   10.64    1.00
   2   9  -2   15.56    1.19
   1   9  -2   18.18    1.26
   1  -9   2    0.21    0.51
   2  -9   2    0.14    0.53
   3  -9   2    9.65    0.98
   4  -9   2   -0.40    0.50
   5  -9   2    1.38    0.60
   6  -9   2    0.92    0.59
   7  -9   2   11.28    1.09
   8  -9   2   -0.09    0.65
   9  -9   2   19.22    1.59
  10  -9   2    8.54    1.18
  11  -9   2   87.61    3.11
  12  -9   2    7.46    1.35
  13  -9   2    1.49    1.16
  14  -9   2   -0.23    1.20
  15  -9   2   -0.68    1.27
  16  -9   2   -1.58    1.40
  17  -9   2    1.75    1.70
 -16  -8   2   -1.08    1.32
 -15  -8   2   -0.40    1.23
  14   8  -2    2.05    1.29
 -14  -8   2    3.06    1.29
  13   8  -2    2.42    1.13
 -13  -8   2   -0.37    1.02
  12   8  -2    1.45    0.99
 -12  -8   2    0.67    0.99
  11   8  -2   31.89    1.98
 -11  -8   2   31.72    1.93
  10   8  -2    5.10    1.07
 -10  -8   2    4.88    0.97
   9   8  -2   42.12    2.01
  -9  -8   2   41.53    1.85
   8   8  -2    2.88    0.83
  -8  -8   2    0.06    0.62
   7   8  -2    0.07    0.61
  -7  -8   2    1.20    0.56
   6   8  -2    2.67    0.69
  -6  -8   2    2.29    0.55
   5   8  -2    8.71    0.92
  -5  -8   2    8.59    0.71
   4   8  -2    3.57    0.68
   3   8  -2    2.31    0.64
   2   8  -2    2.25    0.61
   1   8  -2    0.81    0.53
   0   8  -2    2.56    0.62
   1  -8   2    3.92    0.69
   2  -8   2   10.20    0.91
   3  -8   2    0.87    0.51
   4  -8   2   41.02    1.62
   5  -8   2    0.72    0.52
   6  -8   2   33.16    1.52
   7  -8   2    1.11    0.59
   8  -8   2   28.73    1.54
   9  -8   2    1.08    0.76
  10  -8   2    1.46    0.87
  11  -8   2    0.06    0.90
  12  -8   2    0.23    1.00
  13  -8   2    0.23    1.08
  14  -8   2    1.95    1.24
  15  -8   2   -1.87    1.22
  16  -8   2   -1.86    1.34
 -16  -7   2   -0.61    1.29
 -15  -7   2   -1.16    1.16
  14   7  -2   11.69    1.59
 -14  -7   2   12.40    1.63
  13   7  -2    0.49    1.05
 -13  -7   2   -1.48    0.95
  12   7  -2   50.78    2.46
 -12  -7   2   58.64    2.51
  11   7  -2    5.31    1.12
 -11  -7   2    2.34    0.91
  10   7  -2  121.95    3.52
 -10  -7   2  125.55    3.40
   9   7  -2    6.93    1.00
  -9  -7   2    6.21    0.89
   8   7  -2   10.05    1.02
  -8  -7   2    9.05    0.92
   7   7  -2    0.62    0.60
  -7  -7   2    0.21    0.50
   6   7  -2    3.04    0.68
  -6  -7   2    3.36    0.56
   5   7  -2    0.47    0.52
  -5  -7   2    0.05    0.41
   4   7  -2    6.22    0.75
   3   7  -2   79.37    2.25
   2   7  -2   32.13    1.36
   1   7  -2   50.70    1.68
   0   7  -2    0.32    0.45
   1  -7   2    5.13    0.68
   2  -7   2    2.62    0.56
   3  -7   2    6.99    0.78
   4  -7   2    0.50    0.46
   5  -7   2   13.41    1.01
   6  -7   2    0.53    0.50
   7  -7   2    2.33    0.64
   8  -7   2    0.47    0.58
   9  -7   2   26.76    1.59
 -10   7  -2    2.21    0.67
  10  -7   2    1.71    0.80
 -11   7  -2    1.20    0.71
  11  -7   2    0.54    0.86
 -12   7  -2    1.95    0.82
  12  -7   2    1.28    1.02
 -13   7  -2   -0.33    0.78
  13  -7   2    0.60    1.01
 -14   7  -2    2.25    0.95
  14  -7   2    1.12    1.13
 -15   7  -2   -1.67    0.95
  15  -7   2   -0.43    1.26
 -16   7  -2    0.34    1.19
  16  -7   2    0.42    1.41
 -17   7  -2    0.00    1.21
 -17  -6   2   -3.68    1.20
 -16  -6   2    0.44    1.25
 -15  -6   2   11.56    1.64
  14   6  -2    1.28    1.16
 -14  -6   2    1.12    1.10
  13   6  -2    2.86    1.13
 -13  -6   2    1.29    0.99
  12   6  -2    1.73    0.98
 -12  -6   2    0.79    0.92
  11   6  -2   83.21    2.82
 -11  -6   2   85.06    2.78
  10   6  -2   11.37    1.20
 -10  -6   2    9.42    1.06
   9   6  -2   24.72    1.52
  -9  -6   2   25.16    1.44
   8   6  -2    1.24    0.66
  -8  -6   2    0.02    0.54
  -8  -6   2    1.06    0.41
   7   6  -2   -0.23    0.55
  -7  -6   2   -0.32    0.44
   6   6  -2    0.04    0.48
  -6  -6   2    0.72    0.43
   5   6  -2   26.66    1.26
  -5  -6   2   27.54    1.10
   4   6  -2   88.22    2.31
  -4  -6   2   88.28    2.09
   3   6  -2  162.71    3.60
   2   6  -2  185.69    3.99
   1   6  -2   29.80    1.19
   0   6  -2   10.34    0.82
   1  -6   2    0.73    0.43
   2  -6   2    0.34    0.41
   3  -6   2    1.08    0.44
   4  -6   2   54.97    1.72
  -5   6  -2    0.49    0.40
   5  -6   2    1.06    0.46
  -6   6  -2   94.57    2.29
   6  -6   2   92.73    2.52
  -7   6  -2    0.01    0.39
  -7   6  -2   -0.03    0.37
   7  -6   2   -0.61    0.44
  -8   6  -2    8.52    0.72
  -8   6  -2   10.50    0.82
   8  -6   2   10.12    0.95
  -9   6  -2    6.93    0.77
  -9   6  -2    7.86    0.71
   9  -6   2    7.14    0.93
 -10   6  -2   19.29    1.12
 -10   6  -2   19.45    1.29
  10  -6   2   19.66    1.53
 -11   6  -2    2.44    0.74
  11  -6   2    1.80    0.90
 -12   6  -2   -0.53    0.70
  12  -6   2   -0.16    0.94
 -13   6  -2   -0.18    0.83
  13  -6   2   -0.30    0.99
 -14   6  -2   -0.90    0.85
  14  -6   2   -0.13    1.09
 -15   6  -2    4.87    1.20
  15  -6   2    3.68    1.35
 -16   6  -2   10.21    1.49
  16  -6   2    7.82    1.72
 -17   6  -2    5.43    1.40
 -18   6  -2   -1.22    1.27
 -17  -5   2   -0.17    1.30
 -16  -5   2    2.94    1.38
  15   5  -2   -0.08    1.17
 -15  -5   2   -0.52    1.11
  14   5  -2   21.19    1.82
 -14  -5   2   16.91    1.63
  13   5  -2   -0.37    0.94
 -13  -5   2    0.44    0.92
  12   5  -2   -0.34    0.91
 -12  -5   2    0.33    0.83
  11   5  -2   -0.28    0.80
 -11  -5   2   -0.10    0.76
  10   5  -2    0.11    0.73
 -10  -5   2    0.95    0.69
   9   5  -2    0.75    0.69
  -9  -5   2    0.07    0.58
   8   5  -2   20.23    1.29
  -8  -5   2   19.78    0.82
  -8  -5   2   22.08    1.19
   7   5  -2   16.38    1.14
  -7  -5   2   17.33    0.75
  -7  -5   2   18.13    1.03
   6   5  -2   21.57    1.16
  -6  -5   2   20.76    1.01
   5   5  -2    1.27    0.52
  -5  -5   2    1.01    0.38
   4   5  -2   17.92    1.00
  -4  -5   2   18.12    0.82
   3   5  -2   98.29    2.36
   2   5  -2   28.32    1.11
   1   5  -2   25.62    1.04
   0   5  -2    2.02    0.44
   1  -5   2    2.29    0.48
   2  -5   2    0.99    0.41
  -3   5  -2   28.84    0.99
   3  -5   2   29.33    1.14
  -4   5  -2    1.47    0.39
   4  -5   2    1.26    0.41
  -5   5  -2  320.88    6.16
  -5   5  -2  319.65    6.23
   5  -5   2  325.87    6.42
  -6   5  -2    9.99    0.73
  -6   5  -2    8.10    0.62
   6  -5   2    8.53    0.76
  -7   5  -2   51.29    1.55
  -7   5  -2   51.69    1.50
   7  -5   2   55.36    1.76
  -8   5  -2    2.48    0.51
  -8   5  -2    2.13    0.46
   8  -5   2    2.60    0.63
  -9   5  -2    0.84    0.51
  -9   5  -2    1.27    0.45
   9  -5   2    1.01    0.66
 -10   5  -2    0.96    0.47
 -10   5  -2    0.87    0.59
  10  -5   2    0.68    0.74
 -11   5  -2    6.75    0.90
 -11   5  -2    6.85    0.70
  11  -5   2    7.47    1.08
 -12   5  -2   12.40    1.17
  12  -5   2   11.79    1.34
 -13   5  -2   30.18    1.76
  13  -5   2   30.99    2.10
 -14   5  -2   17.60    1.42
  14  -5   2   16.10    1.69
 -15   5  -2    0.31    0.94
  15  -5   2   -1.65    1.17
 -16   5  -2    3.09    1.13
  16  -5   2    4.58    1.59
 -17   5  -2    0.37    1.20
 -18   5  -2    1.46    1.35
 -17  -4   2   -0.04    1.26
 -16  -4   2    1.65    1.20
  15   4  -2    0.90    1.19
 -15  -4   2    0.47    1.09
  14   4  -2    0.20    1.03
 -14  -4   2    0.16    0.93
  13   4  -2   14.93    1.52
 -13  -4   2   10.65    1.29
  12   4  -2   -0.59    0.87
 -12  -4   2   -0.54    0.72
  11   4  -2    4.60    0.95
 -11  -4   2    4.10    0.85
  10   4  -2    1.26    0.75
 -10  -4   2    2.06    0.72
   9   4  -2    7.90    0.94
  -9  -4   2    5.96    0.77
   8   4  -2   -0.12    0.56
  -8  -4   2    0.08    0.44
  -8  -4   2    0.30    0.29
   7   4  -2   32.54    1.42
  -7  -4   2   34.15    0.96
  -7  -4   2   35.64    1.30
   6   4  -2    6.55    0.71
  -6  -4   2    6.87    0.61
   5   4  -2    9.11    0.74
  -5  -4   2    7.21    0.57
   4   4  -2    2.22    0.48
  -4  -4   2    1.96    0.36
   3   4  -2   11.25    0.77
  -3  -4   2   10.73    0.60
   2   4  -2    2.93    0.45
   1   4  -2    0.65    0.35
   0   4  -2   51.61    1.38
  -1   4  -2    0.33    0.29
  -2   4  -2   96.02    2.07
   2  -4   2   92.32    2.17
  -3   4  -2    2.51    0.37
   3  -4   2    2.66    0.43
  -4   4  -2  158.21    3.25
  -4   4  -2  155.19    3.17
   4  -4   2  163.02    3.38
  -5   4  -2    0.57    0.32
  -5   4  -2    0.24    0.31
   5  -4   2   -0.44    0.35
  -6   4  -2   87.77    2.05
  -6   4  -2   88.03    2.10
   6  -4   2   87.11    2.24
  -7   4  -2    0.33    0.34
  -7   4  -2    0.50    0.37
   7  -4   2    0.47    0.45
  -8   4  -2    0.52    0.42
  -8   4  -2    0.55    0.36
   8  -4   2    0.60    0.53
  -9   4  -2   -0.02    0.36
  -9   4  -2   -0.41    0.41
   9  -4   2    0.19    0.59
 -10   4  -2    2.77    0.50
 -10   4  -2    2.96    0.65
  10  -4   2    3.64    0.82
 -11   4  -2    6.70    0.66
 -11   4  -2    4.53    0.78
  11  -4   2    6.44    1.03
 -12   4  -2   47.90    1.99
  12  -4   2   50.30    2.30
 -13   4  -2   42.33    1.99
  13  -4   2   37.34    2.27
 -14   4  -2   29.33    1.90
  14  -4   2   24.86    1.96
 -15   4  -2    4.12    1.08
  15  -4   2    5.14    1.41
 -16   4  -2    2.01    1.07
 -17   4  -2    1.40    1.20
 -18   4  -2   -0.38    1.22
 -18  -3   2   10.10    1.72
 -17  -3   2    0.18    1.25
 -16  -3   2   43.10    2.74
  15   3  -2    1.21    1.18
 -15  -3   2    0.39    1.08
  14   3  -2    2.67    1.13
 -14  -3   2    3.93    1.10
  13   3  -2    1.40    1.00
 -13  -3   2   -0.80    0.77
  12   3  -2    7.42    1.18
 -12  -3   2    7.04    1.04
  11   3  -2    2.43    0.87
 -11  -3   2    1.46    0.71
  10   3  -2   -0.05    0.70
 -10  -3   2   -0.73    0.54
   9   3  -2   -0.14    0.61
  -9  -3   2    0.07    0.52
   8   3  -2    4.56    0.73
  -8  -3   2    4.93    0.38
  -8  -3   2    4.32    0.63
   7   3  -2    3.31    0.63
  -7  -3   2    2.88    0.31
  -7  -3   2    3.10    0.53
   6   3  -2   17.53    0.98
  -6  -3   2   17.36    0.59
  -6  -3   2   17.12    0.90
   5   3  -2   46.53    1.45
  -5  -3   2   44.58    1.31
   4   3  -2   32.98    1.15
  -4  -3   2   32.51    1.02
   3   3  -2   19.55    0.86
  -3  -3   2   20.33    0.72
   2   3  -2   27.97    0.94
  -2  -3   2   28.71    0.78
   1   3  -2   42.40    1.15
   0   3  -2   24.19    0.79
   0   3  -2   23.20    0.71
  -1   3  -2  153.89    3.01
  -2   3  -2   11.64    0.46
  -2   3  -2   13.46    0.57
   2  -3   2   11.21    0.61
  -3   3  -2  152.67    3.01
  -3   3  -2  156.84    3.08
   3  -3   2  153.99    3.16
  -4   3  -2    0.64    0.29
  -4   3  -2    0.29    0.28
   4  -3   2    0.43    0.35
  -5   3  -2    6.27    0.47
  -5   3  -2    6.49    0.51
   5  -3   2    5.80    0.56
  -6   3  -2    0.42    0.34
  -6   3  -2    0.37    0.31
   6  -3   2    0.40    0.39
  -7   3  -2   12.50    0.68
  -7   3  -2   12.51    0.81
   7  -3   2   13.40    0.93
  -8   3  -2    0.49    0.42
  -8   3  -2    0.22    0.32
   8  -3   2    0.23    0.50
  -9   3  -2    2.53    0.55
  -9   3  -2    2.73    0.44
   9  -3   2    2.98    0.68
 -10   3  -2    2.90    0.64
 -10   3  -2    3.76    0.49
  10  -3   2    1.16    0.69
 -11   3  -2   14.64    1.12
 -11   3  -2   16.03    0.89
  11  -3   2   14.74    1.29
 -12   3  -2   32.18    1.70
  12  -3   2   31.37    1.96
 -13   3  -2   32.00    1.85
  13  -3   2   31.46    2.11
 -14   3  -2   11.78    1.27
  14  -3   2   12.91    1.60
 -15   3  -2    2.50    1.04
  15  -3   2    0.69    1.29
 -16   3  -2   -0.75    1.00
 -17   3  -2    1.28    1.23
 -18   3  -2    3.11    1.40
 -18  -2   2    0.50    1.34
 -17  -2   2   39.17    2.69
  16   2  -2    2.11    1.26
 -16  -2   2   -0.11    1.14
  15   2  -2   31.43    2.30
 -15  -2   2   31.03    2.10
  14   2  -2    0.31    1.01
 -14  -2   2   -1.43    0.79
  13   2  -2   -0.72    0.95
 -13  -2   2    1.49    0.85
  12   2  -2   -0.41    0.85
 -12  -2   2    1.04    0.73
  11   2  -2   -0.29    0.79
 -11  -2   2   -0.78    0.59
  10   2  -2   13.14    1.19
 -10  -2   2   11.53    0.97
   9   2  -2   69.37    2.22
  -9  -2   2   68.17    2.02
   8   2  -2   54.12    1.85
  -8  -2   2   55.13    1.70
   7   2  -2   33.11    1.37
  -7  -2   2   31.86    1.23
   6   2  -2    3.56    0.56
  -6  -2   2    2.10    0.45
   5   2  -2   14.17    0.85
  -5  -2   2   13.31    0.44
  -5  -2   2   12.47    0.73
   4   2  -2    8.54    0.70
  -4  -2   2    9.41    0.61
   3   2  -2    5.90    0.48
  -3  -2   2    6.57    0.42
   2   2  -2    0.61    0.26
  -2  -2   2    0.40    0.19
   1   2  -2    3.41    0.26
   1   2  -2    3.33    0.31
  -1  -2   2    3.43    0.20
   0   2  -2   34.01    0.85
   0   2  -2   34.20    0.80
  -1   2  -2    0.45    0.17
  -1   2  -2    0.08    0.10
   1  -2   2    0.00    0.18
  -2   2  -2   28.12    0.76
  -2   2  -2   26.31    0.68
   2  -2   2   26.43    0.78
  -3   2  -2    0.43    0.24
  -3   2  -2   -0.48    0.24
   3  -2   2   -0.23    0.26
  -4   2  -2   38.94    1.09
  -4   2  -2   40.82    1.05
   4  -2   2   40.59    1.13
  -5   2  -2    0.80    0.30
  -5   2  -2    0.84    0.34
   5  -2   2    0.63    0.36
  -6   2  -2   31.61    0.96
  -6   2  -2   32.81    1.12
   6  -2   2   31.75    1.17
  -7   2  -2    8.01    0.59
  -7   2  -2    7.05    0.62
   7  -2   2    8.56    0.73
  -8   2  -2   15.29    0.72
  -8   2  -2   16.00    0.97
   8  -2   2   16.71    1.07
  -9   2  -2    4.03    0.61
  -9   2  -2    3.40    0.45
   9  -2   2    4.36    0.71
 -10   2  -2    1.24    0.38
 -10   2  -2    1.36    0.56
  10  -2   2   -0.08    0.66
 -11   2  -2    1.70    0.63
  11  -2   2    1.13    0.80
 -12   2  -2    1.80    0.75
  12  -2   2    1.78    0.96
 -13   2  -2   -0.63    0.72
  13  -2   2   -0.74    1.05
 -14   2  -2   -0.02    0.84
  14  -2   2    1.07    1.11
 -15   2  -2    5.73    1.16
  15  -2   2    7.94    1.48
 -16   2  -2    2.93    1.15
 -17   2  -2    1.32    1.16
 -18   2  -2    0.20    1.32
 -18  -1   2    4.33    1.53
 -17  -1   2    2.67    1.22
  16   1  -2   34.05    2.41
 -16  -1   2   24.85    1.96
  15   1  -2    0.93    1.12
 -15  -1   2   -0.36    0.98
  14   1  -2    1.46    1.14
 -14  -1   2    1.59    0.91
  13   1  -2   -0.53    1.02
 -13  -1   2   -0.21    0.78
  12   1  -2   -0.92    0.89
 -12  -1   2    2.15    0.78
  11   1  -2   -0.59    0.81
 -11  -1   2    0.78    0.63
  10   1  -2   71.11    2.43
 -10  -1   2   76.83    2.24
   9   1  -2   41.29    1.72
  -9  -1   2   42.46    1.57
   8   1  -2  172.42    3.92
  -8  -1   2  172.58    3.77
   7   1  -2   21.58    1.16
  -7  -1   2   22.22    1.02
   6   1  -2    9.56    0.77
  -6  -1   2    9.76    0.72
   5   1  -2   10.42    0.82
  -5  -1   2   10.08    0.67
   4   1  -2   -0.05    0.39
  -4  -1   2    0.10    0.28
   3   1  -2    0.01    0.32
  -3  -1   2    0.47    0.24
   2   1  -2   15.17    0.58
  -2  -1   2   15.38    0.49
   1   1  -2  205.46    3.67
  -1  -1   2  200.24    3.68
   0   1  -2   -0.05    0.07
   0   1  -2   -0.01    0.06
  -1   1  -2   20.65    0.47
   1  -1   2   20.39    0.51
  -2   1  -2    1.67    0.21
  -2   1  -2    1.42    0.20
   2  -1   2    1.88    0.22
  -3   1  -2  125.72    2.45
  -3   1  -2  126.29    2.49
   3  -1   2  123.51    2.46
  -4   1  -2    0.40    0.29
  -4   1  -2    0.32    0.28
   4  -1   2    0.77    0.32
  -5   1  -2    9.59    0.65
  -5   1  -2   10.38    0.55
   5  -1   2    9.93    0.67
  -6   1  -2   -0.08    0.28
  -6   1  -2   -0.09    0.34
   6  -1   2   -0.33    0.36
  -7   1  -2    0.77    0.31
  -7   1  -2    1.32    0.42
   7  -1   2    0.94    0.46
  -8   1  -2    0.93    0.33
  -8   1  -2    0.67    0.45
   8  -1   2    1.42    0.53
  -9   1  -2    1.09    0.50
  -9   1  -2    1.09    0.36
   9  -1   2    0.70    0.57
 -10   1  -2    1.29    0.39
 -10   1  -2    1.05    0.57
  10  -1   2    1.97    0.73
 -11   1  -2   12.81    1.06
  11  -1   2   11.44    1.18
 -12   1  -2    1.07    0.73
  12  -1   2    2.29    1.01
 -13   1  -2    4.52    0.96
  13  -1   2    6.53    1.25
 -14   1  -2    5.45    1.05
  14  -1   2    6.48    1.28
 -15   1  -2    0.69    0.94
 -16   1  -2   -1.08    0.97
 -17   1  -2   -1.24    1.06
 -18   1  -2    0.80    1.29
 -18   0   2    0.04    1.22
 -17   0   2   -1.11    1.10
  16   0  -2    2.46    1.32
 -16   0   2    1.09    1.06
  15   0  -2    4.93    1.41
 -15   0   2    4.65    1.12
  14   0  -2    0.42    1.16
 -14   0   2    0.44    0.83
  13   0  -2   26.30    2.11
 -13   0   2   25.61    1.68
  12   0  -2    0.36    0.97
 -12   0   2    2.04    0.74
  11   0  -2    5.35    1.05
 -11   0   2    6.20    0.84
  10   0  -2   11.97    1.14
 -10   0   2   12.92    0.99
   9   0  -2   52.35    1.92
  -9   0   2   54.08    1.74
   8   0  -2   30.56    1.41
  -8   0   2   27.12    0.70
  -8   0   2   30.44    1.23
   7   0  -2    5.36    0.68
  -7   0   2    5.34    0.30
  -7   0   2    5.42    0.60
   6   0  -2   -0.23    0.41
  -6   0   2    0.38    0.15
  -6   0   2    0.79    0.38
   5   0  -2    5.09    0.57
  -5   0   2    4.99    0.47
  -5   0   2    4.38    0.23
   4   0  -2    2.43    0.43
  -4   0   2    2.72    0.36
   3   0  -2    7.86    0.56
  -3   0   2    7.71    0.49
   2   0  -2  266.55    4.94
  -2   0   2  262.36    4.86
   1   0  -2   -0.36    0.07
   1   0  -2   -0.37    0.06
   0   0  -2   -0.11    0.05
  -1   0  -2   -0.02    0.08
  -2   0  -2    0.88    0.20
  -2   0  -2    0.42    0.18
   2   0   2    0.50    0.14
  -3   0  -2    0.55    0.26
  -3   0  -2   -0.05    0.26
   3   0   2    0.47    0.25
  -4   0  -2    0.66    0.31
  -4   0  -2    0.65    0.31
   4   0   2    0.55    0.32
  -5   0  -2    0.73    0.34
  -5   0  -2    1.26    0.31
   5   0   2    1.21    0.37
  -6   0  -2  146.85    2.89
  -6   0  -2  145.68    3.12
   6   0   2  141.23    3.08
  -7   0  -2   10.14    0.74
  -7   0  -2   10.69    0.61
   7   0   2   12.29    0.88
  -8   0  -2   76.84    2.03
  -8   0  -2   66.59    1.63
   8   0   2   71.05    2.02
  -9   0  -2    0.65    0.49
  -9   0  -2    0.37    0.33
   9   0   2    0.24    0.56
 -10   0  -2    8.06    0.84
 -10   0  -2    6.04    0.51
  10   0   2    5.27    0.88
 -11   0  -2   19.96    1.37
  11   0   2   21.62    1.55
 -12   0  -2    5.02    0.89
  12   0   2    4.94    1.07
 -13   0  -2    0.68    0.85
  13   0   2    5.76    1.21
 -14   0  -2    0.80    0.88
  14   0   2    0.49    1.01
 -15   0  -2    0.15    0.94
 -16   0  -2   -1.44    0.95
 -17   0  -2    0.54    1.19
 -18   0  -2    1.23    1.42
 -18   1   2    2.04    1.35
  17  -1  -2   -0.29    1.39
 -17   1   2    0.94    1.18
  16  -1  -2    8.48    1.59
 -16   1   2    8.79    1.42
  15  -1  -2   -1.04    1.15
 -15   1   2    0.66    0.92
  14  -1  -2   15.00    1.72
 -14   1   2   14.21    1.36
  13  -1  -2    1.74    1.19
 -13   1   2    1.43    0.82
  12  -1  -2   15.08    1.51
 -12   1   2   11.84    1.09
  11  -1  -2    0.80    0.83
 -11   1   2    0.43    0.59
  10  -1  -2   11.14    1.12
 -10   1   2   10.35    0.92
   9  -1  -2   -0.25    0.61
  -9   1   2   -0.29    0.48
   8  -1  -2    0.35    0.55
  -8   1   2    0.22    0.43
   7  -1  -2   18.58    1.09
  -7   1   2   17.10    0.93
   6  -1  -2   31.50    1.22
  -6   1   2   29.69    1.09
   5  -1  -2   30.72    1.12
  -5   1   2   30.07    1.01
   4  -1  -2    0.37    0.36
  -4   1   2    0.63    0.30
   3  -1  -2    4.93    0.42
  -3   1   2    3.89    0.34
   2  -1  -2   44.67    1.05
   1  -1  -2   74.83    1.50
   0  -1  -2   -0.04    0.06
  -1  -1  -2    0.82    0.13
   1   1   2    0.81    0.12
  -2  -1  -2    0.26    0.17
   2   1   2    0.35    0.15
  -3  -1  -2  107.80    2.14
  -3  -1  -2  103.53    2.19
   3   1   2  104.89    2.11
  -4  -1  -2    0.51    0.31
  -4  -1  -2    0.11    0.30
   4   1   2   -0.48    0.30
  -5  -1  -2  119.60    2.49
  -5  -1  -2  118.79    2.63
   5   1   2  123.26    2.59
  -6  -1  -2   21.54    0.98
  -6  -1  -2   23.16    0.83
   6   1   2   21.41    0.98
  -7  -1  -2  219.09    4.22
  -7  -1  -2  208.49    4.47
   7   1   2  218.94    4.45
  -8  -1  -2   23.32    1.14
  -8  -1  -2   23.37    0.88
   8   1   2   24.98    1.20
  -9  -1  -2    0.36    0.50
  -9  -1  -2    0.52    0.36
   9   1   2    0.11    0.55
 -10  -1  -2    3.68    0.68
 -10  -1  -2    3.69    0.51
  10   1   2    4.52    0.83
 -11  -1  -2   18.63    1.32
  11   1   2   18.24    1.45
 -12  -1  -2    0.61    0.72
  12   1   2    2.08    0.87
 -13  -1  -2    1.20    0.86
  13   1   2    2.01    1.00
 -14  -1  -2   29.62    1.93
  14   1   2   29.03    2.06
 -15  -1  -2    5.38    1.23
 -16  -1  -2    7.90    1.39
 -17  -1  -2   -0.09    1.23
 -18  -1  -2    7.41    1.69
 -18   2   2   -0.84    1.18
  17  -2  -2    2.85    1.48
 -17   2   2    3.00    1.24
  16  -2  -2    1.05    1.33
 -16   2   2    1.30    1.05
  15  -2  -2   -0.78    1.25
 -15   2   2   -0.47    0.88
  14  -2  -2   -0.37    1.23
 -14   2   2    0.92    0.89
  13  -2  -2   -1.15    1.12
 -13   2   2   -0.06    0.77
  12  -2  -2   -0.62    0.94
 -12   2   2    0.09    0.69
  11  -2  -2   25.37    1.71
 -11   2   2   24.14    1.40
  10  -2  -2    3.96    0.86
 -10   2   2    4.09    0.71
   9  -2  -2   19.39    1.34
  -9   2   2   19.77    1.13
   8  -2  -2   14.60    1.14
  -8   2   2   15.60    0.97
   7  -2  -2   32.71    1.32
  -7   2   2   32.88    1.21
   6  -2  -2   16.95    0.97
  -6   2   2   17.87    0.88
   5  -2  -2    9.30    0.68
  -5   2   2    7.48    0.58
   4  -2  -2    4.33    0.48
  -4   2   2    3.51    0.42
   3  -2  -2   14.30    0.68
   2  -2  -2   12.57    0.55
   1  -2  -2    1.82    0.24
   0  -2  -2    0.15    0.16
   1   2   2    3.69    0.28
  -2  -2  -2   21.08    0.62
   2   2   2   20.14    0.63
  -3  -2  -2    5.68    0.38
   3   2   2    5.05    0.40
  -4  -2  -2   15.49    0.77
  -4  -2  -2   15.86    0.64
   4   2   2   14.23    0.69
  -5  -2  -2    4.70    0.42
  -5  -2  -2    4.61    0.52
   5   2   2    5.10    0.50
  -6  -2  -2  149.59    3.26
  -6  -2  -2  149.43    3.09
   6   2   2  152.11    3.18
  -7  -2  -2   21.66    0.90
  -7  -2  -2   22.43    1.07
   7   2   2   23.17    1.05
  -8  -2  -2   46.90    1.59
  -8  -2  -2   45.74    1.34
   8   2   2   47.83    1.55
  -9  -2  -2    1.00    0.44
  -9  -2  -2    0.87    0.55
   9   2   2    0.33    0.51
 -10  -2  -2    7.61    0.88
  10   2   2    8.25    0.92
 -11  -2  -2    1.45    0.67
  11   2   2    1.91    0.78
 -12  -2  -2    6.89    1.02
  12   2   2    7.31    1.06
 -13  -2  -2   36.83    2.04
  13   2   2   32.16    1.92
 -14  -2  -2   33.01    2.12
 -15  -2  -2   41.20    2.29
 -16  -2  -2    3.73    1.31
 -17  -2  -2    1.42    1.29
 -18  -2  -2   -0.24    1.31
 -18   3   2   -0.21    1.23
  17  -3  -2    0.35    1.46
 -17   3   2   -1.54    1.07
  16  -3  -2   13.92    1.91
 -16   3   2   14.64    1.63
  15  -3  -2    4.42    1.45
 -15   3   2    3.69    1.08
  14  -3  -2   93.93    3.47
 -14   3   2   95.44    3.02
  13  -3  -2    5.44    1.29
 -13   3   2    4.82    0.98
  12  -3  -2    1.28    0.97
 -12   3   2    0.26    0.69
  11  -3  -2    0.77    0.87
 -11   3   2    0.11    0.63
  10  -3  -2    8.05    1.01
 -10   3   2    8.93    0.90
   9  -3  -2    2.74    0.68
  -9   3   2    1.57    0.57
   8  -3  -2    0.19    0.53
  -8   3   2   -0.09    0.42
   7  -3  -2    2.66    0.59
  -7   3   2    2.72    0.51
   6  -3  -2    8.58    0.72
  -6   3   2    9.30    0.70
   5  -3  -2    2.51    0.47
  -5   3   2    3.08    0.44
   4  -3  -2    0.70    0.36
   3  -3  -2   44.93    1.27
   2  -3  -2    0.06    0.27
   1  -3  -2   92.17    2.00
   0  -3  -2    0.02    0.24
   1   3   2  105.89    2.19
   2   3   2    1.62    0.33
   3   3   2    1.52    0.33
  -4  -3  -2    2.09    0.34
   4   3   2    1.89    0.38
  -5  -3  -2    1.17    0.35
  -5  -3  -2    0.73    0.39
   5   3   2    1.14    0.38
  -6  -3  -2    0.27    0.32
  -6  -3  -2    0.68    0.43
   6   3   2   -0.36    0.37
  -7  -3  -2    0.55    0.39
  -7  -3  -2    0.24    0.45
   7   3   2    1.13    0.46
  -8  -3  -2    1.21    0.45
  -8  -3  -2    0.44    0.48
   8   3   2    1.18    0.52
  -9  -3  -2   14.68    0.91
  -9  -3  -2   16.38    1.14
   9   3   2   17.85    1.12
 -10  -3  -2    6.90    0.88
  10   3   2    8.08    0.90
 -11  -3  -2    3.38    0.79
  11   3   2    4.84    0.90
 -12  -3  -2    4.69    0.93
  12   3   2    4.83    0.98
 -13  -3  -2    7.42    1.15
  13   3   2    7.98    1.19
 -14  -3  -2   22.75    1.79
 -15  -3  -2    5.81    1.31
 -16  -3  -2    1.65    1.27
 -17  -3  -2   -2.06    1.17
  18  -4  -2    1.27    1.96
 -18   4   2   -0.28    1.28
  17  -4  -2    0.33    1.55
 -17   4   2   -0.38    1.08
  16  -4  -2    1.35    1.47
 -16   4   2   -0.99    1.05
  15  -4  -2   91.87    3.68
 -15   4   2  104.75    3.37
  14  -4  -2    1.83    1.24
 -14   4   2    1.49    0.94
  13  -4  -2   15.96    1.66
 -13   4   2   17.46    1.46
  12  -4  -2   -1.24    0.91
 -12   4   2   -0.30    0.75
  11  -4  -2   14.78    1.41
 -11   4   2   15.02    1.18
  10  -4  -2    4.58    0.88
 -10   4   2    7.07    0.85
   9  -4  -2    3.17    0.75
  -9   4   2    3.50    0.66
   8  -4  -2   28.27    1.42
  -8   4   2   26.25    1.22
   7  -4  -2   59.07    1.90
  -7   4   2   65.70    1.79
   6  -4  -2   78.86    2.13
   5  -4  -2    7.91    0.69
   4  -4  -2    2.19    0.46
   3  -4  -2   17.32    0.85
   2  -4  -2   22.38    0.91
   1  -4  -2   15.06    0.76
   0  -4  -2    0.29    0.31
   1   4   2    3.91    0.43
   2   4   2   51.84    1.37
   3   4   2    0.53    0.36
   4   4   2   27.63    0.99
  -5  -4  -2    5.11    0.48
   5   4   2    3.24    0.48
  -6  -4  -2   15.12    0.79
  -6  -4  -2   17.09    0.99
   6   4   2   16.54    0.90
  -7  -4  -2    1.25    0.48
  -7  -4  -2    0.72    0.39
   7   4   2    0.74    0.46
  -8  -4  -2    0.19    0.50
  -8  -4  -2    0.38    0.42
   8   4   2    0.68    0.50
  -9  -4  -2    1.79    0.64
  -9  -4  -2    1.12    0.51
   9   4   2    1.73    0.62
 -10  -4  -2    2.48    0.73
  10   4   2    3.37    0.75
 -11  -4  -2    0.71    0.73
  11   4   2    0.97    0.74
 -12  -4  -2   -0.67    0.80
  12   4   2   -0.33    0.80
 -13  -4  -2    0.27    0.89
  13   4   2   -0.52    0.90
 -14  -4  -2    3.35    1.18
 -15  -4  -2   -1.91    1.06
 -16  -4  -2    0.19    1.22
 -17  -4  -2    5.63    1.57
  18  -5  -2    7.92    1.96
 -18   5   2    5.06    1.49
  17  -5  -2    0.08    1.57
 -17   5   2   -1.43    1.13
  16  -5  -2   10.83    1.80
 -16   5   2   16.27    1.67
  15  -5  -2    1.02    1.28
 -15   5   2   -0.76    0.93
  14  -5  -2   31.25    2.39
 -14   5   2   34.41    1.97
  13  -5  -2    0.27    1.06
 -13   5   2   -0.77    0.83
  12  -5  -2    2.89    1.04
 -12   5   2    3.36    0.88
  11  -5  -2    4.17    1.00
 -11   5   2    3.64    0.82
  10  -5  -2    0.79    0.76
 -10   5   2   -0.42    0.53
   9  -5  -2    9.73    1.00
  -9   5   2    9.21    0.85
   8  -5  -2   74.70    2.28
   7  -5  -2  134.03    3.24
   6  -5  -2   81.74    2.25
   5  -5  -2   25.87    1.14
   4  -5  -2    1.59    0.46
   3  -5  -2   10.75    0.78
   2  -5  -2    4.33    0.52
   1  -5  -2   45.46    1.38
   0  -5  -2   10.54    0.77
   1   5   2  295.64    5.76
   2   5   2    0.05    0.37
   3   5   2   21.90    0.96
   4   5   2    4.11    0.54
   5   5   2   51.86    1.55
  -6  -5  -2    7.62    0.72
  -6  -5  -2    8.47    0.65
   6   5   2    8.31    0.72
  -7  -5  -2    0.36    0.48
  -7  -5  -2    0.61    0.41
   7   5   2    0.32    0.45
  -8  -5  -2   -0.08    0.44
  -8  -5  -2   -0.46    0.50
   8   5   2    0.13    0.52
  -9  -5  -2    1.41    0.65
  -9  -5  -2    0.82    0.49
   9   5   2    1.15    0.64
 -10  -5  -2    0.55    0.67
  10   5   2   -0.19    0.62
 -11  -5  -2    1.25    0.78
  11   5   2    0.03    0.76
 -12  -5  -2   11.14    1.26
  12   5   2   13.02    1.32
 -13  -5  -2    6.04    1.18
 -14  -5  -2    1.12    1.07
 -15  -5  -2   -1.55    1.12
 -16  -5  -2    1.75    1.35
 -17  -5  -2    0.78    1.41
  18  -6  -2   -2.01    1.63
  17  -6  -2    1.73    1.57
  16  -6  -2   -2.42    1.30
  15  -6  -2   -2.51    1.20
  14  -6  -2   -0.91    1.10
  13  -6  -2   -1.50    0.98
  12  -6  -2    6.81    1.23
  11  -6  -2   13.60    1.37
  10  -6  -2    4.12    0.91
   9  -6  -2    3.50    0.80
   8  -6  -2   16.79    1.27
   7  -6  -2   35.81    1.55
   6  -6  -2   21.92    1.18
   5  -6  -2    0.30    0.45
   4  -6  -2   30.48    1.25
   3  -6  -2    4.07    0.59
   2  -6  -2    5.08    0.61
   1  -6  -2    1.55    0.47
   0  -6  -2  253.24    5.18
   1   6   2   -0.31    0.41
   2   6   2   98.67    2.40
   3   6   2    1.24    0.48
   4   6   2    7.08    0.70
   5   6   2    0.03    0.43
  -6  -6  -2    0.96    0.42
   6   6   2    1.09    0.50
  -7  -6  -2   15.81    0.91
  -7  -6  -2   13.81    1.00
   7   6   2   14.81    1.02
  -8  -6  -2   49.21    1.84
  -8  -6  -2   51.44    1.63
   8   6   2   56.29    1.83
  -9  -6  -2   25.28    1.44
  -9  -6  -2   24.05    1.29
   9   6   2   23.94    1.36
 -10  -6  -2   12.18    1.16
  10   6   2   14.33    1.18
 -11  -6  -2    0.80    0.80
  11   6   2    0.82    0.81
 -12  -6  -2    3.65    1.05
  12   6   2    2.87    0.94
 -13  -6  -2   13.41    1.55
 -14  -6  -2    0.07    1.16
 -15  -6  -2   -0.81    1.20
 -16  -6  -2    0.45    1.37
  17  -7  -2   -0.69    1.52
  16  -7  -2    4.17    1.61
  15  -7  -2   -0.78    1.25
  14  -7  -2    4.61    1.38
  13  -7  -2   -0.89    1.00
  12  -7  -2    6.04    1.22
  11  -7  -2    1.04    0.89
  10  -7  -2    6.15    1.05
   9  -7  -2    1.86    0.76
   8  -7  -2   -0.21    0.56
   7  -7  -2    7.60    0.87
   6  -7  -2    1.12    0.51
   5  -7  -2    7.36    0.81
   4  -7  -2    2.81    0.58
   3  -7  -2   22.93    1.16
   2  -7  -2    0.23    0.45
   1  -7  -2   31.14    1.31
   0  -7  -2    2.13    0.55
   2   7   2    0.11    0.47
   3   7   2   -0.52    0.44
   4   7   2    4.66    0.67
   5   7   2    2.25    0.58
   6   7   2   -0.42    0.49
  -7  -7  -2   38.99    1.57
  -7  -7  -2   37.42    1.43
   7   7   2   36.70    1.53
  -8  -7  -2   20.17    1.16
  -8  -7  -2   18.89    1.33
   8   7   2   23.49    1.35
  -9  -7  -2   32.89    1.71
   9   7   2   33.10    1.62
 -10  -7  -2    9.51    1.16
  10   7   2   12.16    1.16
 -11  -7  -2    2.63    0.93
  11   7   2    0.27    0.76
 -12  -7  -2    7.86    1.21
  12   7   2    7.42    1.23
 -13  -7  -2    0.48    1.10
 -14  -7  -2   -0.97    1.14
 -15  -7  -2   -0.14    1.28
 -16  -7  -2   15.46    2.02
  17  -8  -2   -0.49    1.62
  16  -8  -2   -1.22    1.41
  15  -8  -2   -1.05    1.26
  14  -8  -2   -0.62    1.17
  13  -8  -2    3.57    1.24
  12  -8  -2    1.99    1.11
  11  -8  -2    1.68    0.98
  10  -8  -2    2.81    0.90
   9  -8  -2   12.43    1.23
   8  -8  -2   16.12    1.32
   7  -8  -2    0.68    0.58
   6  -8  -2    2.01    0.62
   5  -8  -2    0.90    0.54
   4  -8  -2   22.12    1.24
   3  -8  -2    5.36    0.72
   2  -8  -2   18.81    1.16
   1  -8  -2    1.13    0.54
   0  -8  -2    4.93    0.71
  -1  -8  -2    0.55    0.49
   2   8   2    2.31    0.61
   3   8   2    0.21    0.51
   4   8   2   23.83    1.26
   5   8   2    0.39    0.56
   6   8   2    1.44    0.65
  -7  -8  -2   11.19    1.01
   7   8   2   12.57    1.08
  -8  -8  -2   25.47    1.53
  -8  -8  -2   24.28    1.32
   8   8   2   24.42    1.53
  -9  -8  -2   11.41    1.16
   9   8   2   12.18    1.18
 -10  -8  -2    4.92    1.01
  10   8   2    5.11    0.97
 -11  -8  -2    1.52    0.90
  11   8   2    0.58    0.80
 -12  -8  -2    3.16    1.09
 -13  -8  -2   -0.04    1.12
 -14  -8  -2    0.86    1.30
 -15  -8  -2   28.27    2.39
 -16  -8  -2    4.17    1.67
  17  -9  -2   -2.19    1.45
  16  -9  -2   -1.09    1.40
  15  -9  -2   -0.12    1.31
  14  -9  -2   20.86    2.07
  13  -9  -2   11.93    1.57
  12  -9  -2   37.87    2.34
  11  -9  -2   12.54    1.46
  10  -9  -2    1.63    0.89
   9  -9  -2    3.93    0.93
   8  -9  -2    1.73    0.77
   7  -9  -2    3.26    0.78
   6  -9  -2    4.53    0.81
   5  -9  -2   26.71    1.43
   4  -9  -2    2.39    0.64
   3  -9  -2    0.43    0.50
   2  -9  -2    0.48    0.54
   1  -9  -2   20.74    1.31
   0  -9  -2    0.39    0.54
  -1  -9  -2   14.84    1.15
   2   9   2    1.60    0.64
   3   9   2    2.63    0.67
   4   9   2    6.62    0.86
   5   9   2    4.34    0.78
   6   9   2    0.41    0.65
  -7  -9  -2    0.91    0.66
   7   9   2    0.34    0.73
  -8  -9  -2   -0.19    0.61
  -8  -9  -2   -0.15    0.73
   8   9   2    0.40    0.74
  -9  -9  -2    0.61    0.79
   9   9   2   -0.78    0.73
 -10  -9  -2    2.73    0.93
  10   9   2    0.52    0.83
 -11  -9  -2    0.98    0.95
  11   9   2    1.66    0.93
 -12  -9  -2    5.17    1.23
 -13  -9  -2   -2.37    1.07
 -14  -9  -2    3.01    1.32
 -15  -9  -2    3.23    1.44
  16 -10  -2   -0.69    1.50
  15 -10  -2   12.16    1.86
  14 -10  -2    1.19    1.31
  13 -10  -2   36.76    2.53
  12 -10  -2    5.57    1.29
  11 -10  -2   14.95    1.55
  10 -10  -2    2.29    0.98
   9 -10  -2   -0.05    0.77
   8 -10  -2    1.17    0.77
   7 -10  -2    8.93    1.11
   6 -10  -2   38.28    1.83
   5 -10  -2   16.95    1.35
   4 -10  -2   56.02    2.09
   3 -10  -2    1.29    0.61
   2 -10  -2   16.29    1.30
   1 -10  -2    0.14    0.53
   0 -10  -2   15.65    1.27
  -1 -10  -2    0.98    0.62
   3  10   2    1.52    0.72
   4  10   2    0.46    0.67
   5  10   2   -0.20    0.65
   6  10   2   10.28    1.13
   7  10   2    4.06    0.91
  -8 -10  -2    4.20    0.92
  -8 -10  -2    4.97    0.87
   8  10   2    4.60    1.00
  -9 -10  -2   -0.01    0.82
   9  10   2   -0.17    0.85
 -10 -10  -2   -0.68    0.85
  10  10   2   -0.16    0.83
 -11 -10  -2    2.47    1.05
  11  10   2    3.21    1.27
 -12 -10  -2    0.37    1.10
 -13 -10  -2    0.45    1.19
 -14 -10  -2    1.78    1.41
  16 -11  -2    1.01    1.60
  15 -11  -2   -2.18    1.35
  14 -11  -2    2.13    1.38
  13 -11  -2    2.91    1.35
  12 -11  -2    7.09    1.40
  11 -11  -2    0.61    1.00
  10 -11  -2    2.56    1.05
   9 -11  -2    1.96    0.93
   8 -11  -2    0.81    0.76
   7 -11  -2   27.03    1.78
   6 -11  -2   15.34    1.36
   5 -11  -2  101.34    3.09
   4 -11  -2    6.51    0.97
   3 -11  -2    8.77    1.04
   2 -11  -2   -0.78    0.61
   1 -11  -2   10.21    1.13
   0 -11  -2    1.10    0.71
  -1 -11  -2   51.10    2.12
  -2 -11  -2    2.17    0.82
   3  11   2   94.32    2.88
   4  11   2    1.89    0.77
   5  11   2    1.61    0.82
   6  11   2    5.99    1.04
   7  11   2   10.16    1.25
  -8 -11  -2    3.41    0.91
   8  11   2    2.10    0.91
  -9 -11  -2    2.82    1.02
   9  11   2    1.63    0.94
 -10 -11  -2    2.18    1.04
  10  11   2    5.24    1.18
 -11 -11  -2    2.05    1.14
 -12 -11  -2   -0.10    1.15
 -13 -11  -2    0.09    1.23
 -14 -11  -2    3.13    1.51
  15 -12  -2   -1.76    1.39
  14 -12  -2   -0.94    1.30
  13 -12  -2    0.13    1.23
  12 -12  -2   -0.25    1.12
  11 -12  -2   -0.06    1.02
  10 -12  -2   11.72    1.44
   9 -12  -2    2.91    0.96
   8 -12  -2    0.78    0.83
   7 -12  -2    5.95    1.09
   6 -12  -2   13.52    1.29
   5 -12  -2    5.25    0.99
   4 -12  -2    5.89    1.00
   3 -12  -2    0.07    0.66
   2 -12  -2   36.03    1.93
   1 -12  -2   -0.02    0.71
   0 -12  -2    3.52    0.95
  -1 -12  -2   -0.04    0.79
  -2 -12  -2  128.62    3.77
   4  12   2   17.50    1.50
   5  12   2   -0.63    0.79
   6  12   2   16.86    1.52
   7  12   2    2.99    1.03
  -8 -12  -2    0.80    0.86
   8  12   2    1.61    1.00
  -9 -12  -2   29.49    2.00
   9  12   2   25.52    1.95
 -10 -12  -2   17.88    1.70
  10  12   2   21.35    1.80
 -11 -12  -2   28.51    2.16
 -12 -12  -2    1.79    1.29
 -13 -12  -2   -1.02    1.28
  15 -13  -2    0.19    1.51
  14 -13  -2    3.02    1.50
  13 -13  -2    1.45    1.32
  12 -13  -2   -0.42    1.22
  11 -13  -2    0.10    1.14
  10 -13  -2    4.36    1.22
   9 -13  -2    0.39    0.91
   8 -13  -2    1.23    0.93
   7 -13  -2   -0.72    0.79
   6 -13  -2   -0.24    0.75
   5 -13  -2   -1.33    0.67
   4 -13  -2    0.77    0.81
   3 -13  -2   21.56    1.73
   2 -13  -2    0.18    0.79
   1 -13  -2    5.64    1.08
   0 -13  -2    2.77    0.98
  -1 -13  -2   39.39    2.24
  -2 -13  -2    0.45    0.92
  -3 -13  -2   30.92    2.02
   5  13   2    1.06    0.94
   6  13   2    8.02    1.30
   7  13   2    0.08    0.93
  -8 -13  -2    3.45    1.02
   8  13   2    5.00    1.23
  -9 -13  -2   33.53    2.22
   9  13   2   34.29    2.27
 -10 -13  -2   45.15    2.74
 -11 -13  -2    7.51    1.50
 -12 -13  -2    1.35    1.35
  14 -14  -2   -1.18    1.43
  13 -14  -2   -0.38    1.38
  12 -14  -2    3.15    1.45
  11 -14  -2    7.36    1.51
  10 -14  -2    3.62    1.27
   9 -14  -2    0.93    1.03
   8 -14  -2    0.00    0.94
   7 -14  -2    0.27    0.93
   6 -14  -2    7.64    1.24
   5 -14  -2   -0.48    0.82
   4 -14  -2    4.91    1.10
   3 -14  -2   -0.30    0.81
   2 -14  -2    7.75    1.33
   1 -14  -2   -0.03    0.88
   0 -14  -2   -0.52    0.91
  -1 -14  -2   -0.75    0.94
  -2 -14  -2    3.56    1.15
  -3 -14  -2    1.18    1.06
  -4 -14  -2   10.12    1.45
   6  14   2   10.98    1.45
   7  14   2    0.20    1.04
   8  14   2    2.22    1.18
   9  14   2   11.38    1.64
  13 -15  -2   -0.12    1.44
  12 -15  -2   15.41    1.97
  11 -15  -2   25.87    2.34
  10 -15  -2   12.46    1.72
   9 -15  -2    3.44    1.27
   8 -15  -2    0.62    1.10
   7 -15  -2    7.39    1.35
   6 -15  -2    0.18    0.88
   5 -15  -2    2.59    1.10
   4 -15  -2    0.12    0.96
   3 -15  -2   13.71    1.56
   2 -15  -2   -0.10    1.00
   1 -15  -2    1.24    1.08
   0 -15  -2    1.32    1.04
  -1 -15  -2    6.45    1.33
  -2 -15  -2   -0.42    1.08
  -3 -15  -2    3.93    1.24
  -4 -15  -2    1.54    1.19
  -5 -15  -2   -0.75    1.10
   7  15   2   -0.17    1.11
   8  15   2    0.25    1.18
  12 -16  -2   19.56    2.19
  11 -16  -2   32.95    2.72
  10 -16  -2   15.32    1.89
   9 -16  -2    3.10    1.35
   8 -16  -2    8.62    1.61
   7 -16  -2    0.72    1.12
   6 -16  -2    0.63    1.08
   5 -16  -2    4.08    1.29
   4 -16  -2   82.38    3.42
   3 -16  -2    3.28    1.26
   2 -16  -2   28.06    2.34
   1 -16  -2    1.11    1.17
   0 -16  -2    5.46    1.41
  -1 -16  -2    2.43    1.27
  -2 -16  -2    1.59    1.29
  -3 -16  -2   -1.07    1.19
  -4 -16  -2   11.34    1.72
  -5 -16  -2    0.98    1.31
  -6 -16  -2   -0.50    1.32
  10 -17  -2    0.07    1.32
   9 -17  -2    3.64    1.51
   8 -17  -2    4.05    1.51
   7 -17  -2    8.72    1.64
   6 -17  -2   -0.55    1.20
   5 -17  -2   40.73    2.86
   4 -17  -2    0.98    1.25
   3 -17  -2   55.72    3.16
   2 -17  -2    0.12    1.16
   1 -17  -2    1.24    1.32
   0 -17  -2    0.63    1.31
  -1 -17  -2    3.25    1.46
  -2 -17  -2    2.53    1.36
  -3 -17  -2   36.81    3.00
  -4 -17  -2   13.27    2.10
  -5 -17  -2   22.44    2.38
  -6 -17  -2    2.67    1.60
  -7 -17  -2    0.23    1.47
   9 -18  -2    1.05    1.42
   8 -18  -2    8.35    1.79
   7 -18  -2   -1.44    1.25
   6 -18  -2    2.01    1.38
   5 -18  -2   -0.83    1.25
   4 -18  -2   15.89    2.08
   3 -18  -2    2.24    1.38
   2 -18  -2    2.12    1.39
   1 -18  -2    0.32    1.40
   0 -18  -2   15.89    2.14
  -1 -18  -2    1.77    1.52
  -2 -18  -2   13.73    2.16
  -3 -18  -2    8.00    1.92
  -4 -18  -2   37.20    3.05
  -5 -18  -2    6.36    1.89
   6 -19  -2    0.69    1.45
   5 -19  -2    1.20    1.54
   4 -19  -2    0.32    1.39
   3 -19  -2   -0.20    1.45
   2 -19  -2   -2.07    1.29
   1 -19  -2   12.91    2.14
   0 -19  -2    0.78    1.65
  -1 -19  -2    0.80    1.68
  -2 -19  -2    1.35    1.64
  -3 -19  -2    9.71    2.08
  -3 -19   3    0.08    1.58
  -2 -19   3   10.58    2.20
  -1 -19   3    2.00    1.63
   0 -19   3   -0.77    1.47
   1 -19   3    0.93    1.46
   2 -19   3   -1.47    1.36
   3 -19   3    2.69    1.65
   4 -19   3    1.29    1.43
   5 -19   3    4.04    1.57
   6 -19   3    1.73    1.47
  -5 -18   3   11.46    2.10
  -4 -18   3    0.93    1.53
  -3 -18   3    2.86    1.64
  -2 -18   3    1.48    1.53
  -1 -18   3    1.46    1.45
   0 -18   3    5.50    1.67
   1 -18   3    5.45    1.64
   2 -18   3    6.66    1.74
   3 -18   3    2.22    1.47
   4 -18   3    0.25    1.28
   5 -18   3    6.15    1.59
   6 -18   3    9.01    1.78
   7 -18   3    1.27    1.36
   8 -18   3   -1.91    1.19
   9 -18   3    0.01    1.37
   8  17  -3    9.87    1.83
   7  17  -3    1.43    1.44
   6  17  -3   34.96    2.65
  -4 -17   3    1.45    1.42
  -3 -17   3    0.13    1.34
  -2 -17   3   -0.46    1.23
  -1 -17   3    3.64    1.47
   0 -17   3   25.30    2.40
   1 -17   3   31.87    2.62
   2 -17   3   26.97    2.42
   3 -17   3   12.57    1.94
   4 -17   3   -0.43    1.17
   5 -17   3   -0.89    1.12
   6 -17   3   -0.41    1.09
   7 -17   3   -0.81    1.13
   8 -17   3    2.11    1.37
   9 -17   3   20.41    2.13
  10 -17   3   -0.22    1.41
   9  16  -3    1.54    1.38
   8  16  -3   -0.66    1.28
   7  16  -3    3.72    1.44
   6  16  -3    1.89    1.26
   5  16  -3   -0.23    1.15
  -3 -16   3   11.87    1.83
  -2 -16   3    1.94    1.27
  -1 -16   3    0.60    1.19
   0 -16   3   12.95    1.78
   1 -16   3   19.24    2.05
   2 -16   3   13.45    1.80
   3 -16   3    1.84    1.15
   4 -16   3    0.96    1.05
   5 -16   3    0.74    1.07
   6 -16   3    1.36    1.18
   7 -16   3   -0.52    1.03
   8 -16   3   51.88    2.96
   9 -16   3   -1.92    1.19
  10 -16   3   39.50    2.91
  11 -16   3   -0.59    1.29
  12 -16   3   -1.52    1.38
  10  15  -3    2.83    1.40
   9  15  -3    0.07    1.23
   8  15  -3    8.00    1.56
   7  15  -3   -0.99    1.09
   6  15  -3    1.79    1.18
   5  15  -3    0.80    1.13
   4  15  -3   10.85    1.58
  -2 -15   3    7.83    1.52
  -1 -15   3    0.51    1.05
   0 -15   3    3.16    1.16
   1 -15   3    5.74    1.26
   2 -15   3    0.41    0.94
   3 -15   3    1.25    0.99
   4 -15   3    0.10    0.95
   5 -15   3    8.81    1.39
   6 -15   3    0.29    0.95
   7 -15   3   13.76    1.62
   8 -15   3    0.99    1.13
   9 -15   3   59.97    3.10
  10 -15   3   -1.73    1.17
  11 -15   3    4.00    1.49
  12 -15   3    0.75    1.41
  13 -15   3    0.65    1.46
  11  14  -3   15.98    1.92
  10  14  -3    0.40    1.20
   9  14  -3    3.37    1.31
   8  14  -3   -1.10    1.07
   7  14  -3    9.17    1.47
   6  14  -3   -0.85    0.98
   5  14  -3   -0.50    0.99
   4  14  -3   -0.08    0.98
   3  14  -3    1.97    1.05
  -1 -14   3    3.59    1.09
   0 -14   3    5.26    1.20
   1 -14   3    3.56    1.08
   2 -14   3   10.29    1.37
   3 -14   3    7.50    1.25
   4 -14   3   26.23    2.02
   5 -14   3    1.75    0.97
   6 -14   3    3.82    1.10
   7 -14   3    0.73    0.93
   8 -14   3    6.38    1.27
   9 -14   3    0.48    1.14
  10 -14   3   -1.39    1.07
  11 -14   3   -0.41    1.19
  12 -14   3    2.49    1.38
  13 -14   3   -3.19    1.21
  14 -14   3   -3.33    1.28
  12  13  -3   41.09    2.81
  11  13  -3    0.54    1.24
  10  13  -3    6.87    1.43
   9  13  -3    0.26    1.11
   8  13  -3   13.01    1.63
   7  13  -3    1.06    0.98
   6  13  -3   13.57    1.52
   5  13  -3   10.16    1.43
   4  13  -3   40.09    2.27
   3  13  -3   10.93    1.38
   2  13  -3   -0.32    0.80
   0 -13   3    7.77    1.19
   1 -13   3    1.21    0.86
   2 -13   3    0.50    0.80
   3 -13   3    1.27    0.81
   4 -13   3    0.51    0.77
   5 -13   3   -0.27    0.74
   6 -13   3    0.12    0.79
   7 -13   3    4.88    1.11
   8 -13   3   -0.18    0.89
   9 -13   3    9.35    1.39
  10 -13   3    0.14    1.02
  11 -13   3    6.98    1.39
  12 -13   3    2.02    1.31
  13 -13   3    1.67    1.32
  14 -13   3    1.81    1.48
  13  12  -3   31.67    2.79
  12  12  -3    0.14    1.21
  11  12  -3   15.28    1.79
  10  12  -3    0.46    1.14
   9  12  -3    5.56    1.28
   8  12  -3    1.40    1.01
  -8 -12   3    0.29    1.20
   7  12  -3    3.94    1.12
  -7 -12   3    3.61    1.15
   6  12  -3    5.40    1.14
   5  12  -3  150.29    4.14
   4  12  -3   29.72    1.92
   3  12  -3   40.17    2.06
   2  12  -3    1.04    0.80
   0 -12   3    5.28    0.98
   1 -12   3    0.92    0.72
   2 -12   3   45.31    2.13
   3 -12   3   21.08    1.64
   4 -12   3   23.25    1.75
   5 -12   3    0.77    0.71
   6 -12   3    3.76    0.95
   7 -12   3    0.20    0.78
   8 -12   3   29.85    2.00
   9 -12   3   -0.34    0.85
  10 -12   3    2.77    1.07
  11 -12   3    1.81    1.15
  12 -12   3   -0.75    1.10
  13 -12   3   -0.94    1.12
  14 -12   3   -1.30    1.32
  15 -12   3   -3.18    1.31
 -14 -11   3   -0.36    1.38
  13  11  -3   -0.38    1.17
 -13 -11   3   -1.61    1.14
  12  11  -3    0.36    1.19
 -12 -11   3   -0.61    1.18
  11  11  -3   -0.35    1.08
 -11 -11   3   -0.69    0.98
  10  11  -3   12.57    1.58
 -10 -11   3   10.04    1.29
   9  11  -3   -0.77    0.92
  -9 -11   3   -0.15    0.75
   8  11  -3   15.75    1.54
  -8 -11   3   17.79    1.34
   7  11  -3    1.09    0.92
  -7 -11   3    2.38    0.76
   6  11  -3   50.92    2.29
  -6 -11   3   54.36    1.93
   5  11  -3   24.27    1.75
  -5 -11   3   26.85    1.32
   4  11  -3   49.69    2.15
   3  11  -3    8.34    1.08
   2  11  -3    2.77    0.82
   1  11  -3    3.25    0.82
   0 -11   3    1.13    0.69
   1 -11   3   32.20    1.75
   2 -11   3   54.52    2.24
   3 -11   3  300.17    6.72
   4 -11   3   21.42    1.59
   5 -11   3   33.88    1.80
   6 -11   3   -0.33    0.64
   7 -11   3    4.80    0.95
   8 -11   3    0.16    0.78
   9 -11   3   10.38    1.29
  10 -11   3    1.72    0.97
  11 -11   3   55.68    2.68
  12 -11   3    2.09    1.15
  13 -11   3    0.06    1.16
  14 -11   3    0.14    1.36
  15 -11   3    5.74    1.69
  16 -11   3    2.33    1.72
 -15 -10   3   -1.51    1.26
 -14 -10   3    1.44    1.37
  13  10  -3    1.54    1.18
 -13 -10   3   -0.65    1.16
  12  10  -3    0.48    1.08
 -12 -10   3    0.32    1.11
  11  10  -3    8.66    1.39
 -11 -10   3    8.63    1.27
  10  10  -3   -1.17    0.92
 -10 -10   3   -0.05    0.80
   9  10  -3   21.80    1.72
  -9 -10   3   24.63    1.70
   8  10  -3   -0.26    0.84
  -8 -10   3   -0.25    0.69
   7  10  -3   -0.14    0.74
  -7 -10   3   -0.13    0.60
   6  10  -3    0.94    0.76
  -6 -10   3    0.08    0.57
   5  10  -3    6.22    0.96
  -5 -10   3    6.63    0.75
   4  10  -3   -0.26    0.68
   3  10  -3    2.17    0.75
   2  10  -3   18.81    1.37
   1  10  -3   12.71    1.16
   1 -10   3    8.90    0.98
   2 -10   3  105.61    3.08
   3 -10   3   34.09    1.69
   4 -10   3   51.47    2.06
   5 -10   3    0.88    0.60
   6 -10   3    8.16    1.00
   7 -10   3    1.11    0.68
   8 -10   3    2.19    0.83
   9 -10   3    3.87    0.96
  10 -10   3  121.90    3.72
  11 -10   3    9.61    1.35
  12 -10   3   26.97    2.07
  13 -10   3    1.37    1.24
  14 -10   3    0.47    1.23
  15 -10   3    0.30    1.39
  16 -10   3    0.00    1.55
 -15  -9   3   -0.99    1.26
  14   9  -3    6.16    1.44
 -14  -9   3    6.25    1.46
  13   9  -3    1.65    1.19
 -13  -9   3   -1.07    1.05
  12   9  -3    1.84    1.13
 -12  -9   3   -0.08    1.04
  11   9  -3    0.01    0.99
 -11  -9   3   -0.27    0.88
  10   9  -3    1.38    0.99
 -10  -9   3    1.96    0.89
   9   9  -3    0.15    0.86
  -9  -9   3    0.67    0.79
   8   9  -3    5.16    1.00
  -8  -9   3    4.34    0.83
   7   9  -3    0.16    0.69
  -7  -9   3    0.49    0.59
   6   9  -3   20.95    1.47
  -6  -9   3   21.47    1.21
   5   9  -3    4.18    0.81
  -5  -9   3    3.13    0.57
   4   9  -3   45.76    1.82
   3   9  -3   10.33    1.00
   2   9  -3   21.62    1.34
   1   9  -3    8.74    0.92
   0   9  -3    8.58    0.92
   1  -9   3    1.67    0.60
   2  -9   3   -0.01    0.51
   3  -9   3    7.57    0.84
   4  -9   3    0.86    0.57
   5  -9   3    6.75    0.86
   6  -9   3    1.10    0.61
   7  -9   3    6.62    0.93
   8  -9   3    1.05    0.70
   9  -9   3   53.17    2.23
  10  -9   3    5.29    1.06
  11  -9   3   94.45    3.24
  12  -9   3    2.18    1.09
  13  -9   3   -1.95    1.02
  14  -9   3   -0.29    1.17
  15  -9   3   -2.28    1.27
  16  -9   3    4.99    1.63
 -16  -8   3   -0.87    1.31
 -15  -8   3   -0.33    1.25
  14   8  -3   -0.58    1.15
 -14  -8   3    1.98    1.19
  13   8  -3    1.88    1.12
 -13  -8   3    1.32    1.06
  12   8  -3   -0.55    0.97
 -12  -8   3   -0.07    0.96
  11   8  -3  104.52    3.38
 -11  -8   3  110.76    3.37
  10   8  -3    4.02    1.05
 -10  -8   3    4.75    0.96
   9   8  -3   14.61    1.34
  -9  -8   3   15.86    1.21
   8   8  -3    1.15    0.73
  -8  -8   3    1.86    0.66
   7   8  -3    0.57    0.67
  -7  -8   3    0.49    0.51
   6   8  -3    2.56    0.70
  -6  -8   3    2.04    0.54
   5   8  -3    4.32    0.77
  -5  -8   3    4.80    0.59
   4   8  -3    0.83    0.56
  -4  -8   3    0.60    0.39
   3   8  -3    5.44    0.77
   2   8  -3    2.43    0.62
   1   8  -3    1.12    0.54
   0   8  -3   10.16    0.88
   1  -8   3    1.36    0.55
   2  -8   3    1.21    0.54
   3  -8   3    4.72    0.72
   4  -8   3   37.15    1.56
   5  -8   3    0.70    0.51
   6  -8   3   38.02    1.63
   7  -8   3    0.53    0.58
   8  -8   3   13.35    1.16
   9  -8   3    1.18    0.75
  10  -8   3    3.87    0.98
  11  -8   3   -0.70    0.83
  12  -8   3   -0.71    1.00
  13  -8   3    3.74    1.22
  14  -8   3    3.55    1.33
  15  -8   3    0.71    1.26
  16  -8   3   -2.09    1.29
 -16  -7   3   -1.05    1.18
  15   7  -3    0.10    1.42
 -15  -7   3   -0.14    1.24
  14   7  -3    7.99    1.44
 -14  -7   3    5.18    1.35
  13   7  -3    1.71    1.11
 -13  -7   3    0.90    1.04
  12   7  -3   73.10    2.90
 -12  -7   3   74.98    2.80
  11   7  -3    1.90    0.96
 -11  -7   3    0.37    0.86
  10   7  -3  120.57    3.51
 -10  -7   3  122.23    3.33
   9   7  -3    1.43    0.77
  -9  -7   3   -0.07    0.64
   8   7  -3    0.40    0.68
  -8  -7   3    0.47    0.58
   7   7  -3    0.28    0.57
  -7  -7   3    0.00    0.48
   6   7  -3    2.31    0.64
  -6  -7   3    1.92    0.52
   5   7  -3    2.09    0.60
  -5  -7   3    2.13    0.47
   4   7  -3   28.56    1.36
  -4  -7   3   28.06    1.07
   3   7  -3   69.58    2.06
   2   7  -3   43.24    1.56
   1   7  -3   13.70    1.00
   0   7  -3    0.37    0.46
   2  -7   3    3.66    0.59
   3  -7   3    4.56    0.64
   4  -7   3    0.65    0.51
  -5   7  -3    8.69    0.74
   5  -7   3   10.83    0.90
  -6   7  -3    1.62    0.50
   6  -7   3    1.88    0.56
  -7   7  -3    6.78    0.69
   7  -7   3    7.56    0.86
  -8   7  -3   -0.34    0.45
   8  -7   3   -1.07    0.51
  -9   7  -3   22.90    1.21
  -9   7  -3   25.50    1.31
   9  -7   3   24.61    1.55
 -10   7  -3    0.68    0.62
 -10   7  -3    1.12    0.56
  10  -7   3    0.69    0.78
 -11   7  -3    1.59    0.70
  11  -7   3    0.51    0.88
 -12   7  -3    1.66    0.77
  12  -7   3   -0.27    0.95
 -13   7  -3    5.46    1.02
  13  -7   3    4.10    1.18
 -14   7  -3    1.22    0.93
  14  -7   3    0.25    1.10
 -15   7  -3    0.02    1.02
  15  -7   3   -0.39    1.19
 -16   7  -3   -1.31    1.09
  16  -7   3    0.91    1.46
 -17   7  -3    1.64    1.23
 -17  -6   3   -0.12    1.43
 -16  -6   3   -1.17    1.15
  15   6  -3   15.89    1.81
 -15  -6   3   16.88    1.78
  14   6  -3    3.22    1.22
 -14  -6   3    0.65    1.03
  13   6  -3   -0.04    1.00
 -13  -6   3    2.26    0.98
  12   6  -3    1.92    1.02
 -12  -6   3    0.77    0.87
  11   6  -3   68.28    2.62
 -11  -6   3   69.30    2.51
  10   6  -3    1.79    0.89
 -10  -6   3    2.76    0.80
   9   6  -3   11.27    1.09
  -9  -6   3   12.10    1.03
   8   6  -3   -0.02    0.61
  -8  -6   3    1.53    0.60
  -8  -6   3    0.81    0.39
   7   6  -3    0.39    0.57
  -7  -6   3    0.16    0.46
   6   6  -3    2.52    0.62
  -6  -6   3    3.71    0.53
   5   6  -3   71.78    2.07
  -5  -6   3   71.97    1.84
   4   6  -3  106.98    2.67
  -4  -6   3  108.09    2.41
   3   6  -3  220.61    4.66
   2   6  -3  116.09    2.77
   1   6  -3   17.75    1.00
   0   6  -3    0.52    0.43
   2  -6   3    3.06    0.53
  -3   6  -3    3.44    0.49
   3  -6   3    3.32    0.53
  -4   6  -3   49.75    1.46
   4  -6   3   47.86    1.59
  -5   6  -3    6.24    0.61
   5  -6   3    6.18    0.70
  -6   6  -3   57.66    1.64
  -6   6  -3   55.64    1.57
   6  -6   3   58.50    1.83
  -7   6  -3    1.26    0.42
  -7   6  -3    0.87    0.44
   7  -6   3    0.79    0.50
  -8   6  -3   26.76    1.16
  -8   6  -3   25.72    1.18
   8  -6   3   27.44    1.42
  -9   6  -3    2.28    0.60
  -9   6  -3    2.60    0.55
   9  -6   3    3.03    0.74
 -10   6  -3   13.25    1.06
 -10   6  -3   12.43    0.91
  10  -6   3   12.71    1.20
 -11   6  -3    1.27    0.69
 -11   6  -3    0.40    0.57
  11  -6   3    0.13    0.81
 -12   6  -3    0.18    0.74
 -12   6  -3   -0.41    0.56
  12  -6   3    0.64    0.95
 -13   6  -3   -0.80    0.73
  13  -6   3   -0.73    0.94
 -14   6  -3    0.62    0.90
  14  -6   3    0.12    1.09
 -15   6  -3    5.81    1.28
  15  -6   3    7.52    1.52
 -16   6  -3    7.68    1.38
 -17   6  -3    4.81    1.40
 -17  -5   3   -0.94    1.28
 -16  -5   3    5.39    1.44
  15   5  -3    0.42    1.15
 -15  -5   3   -0.06    1.07
  14   5  -3   14.63    1.65
 -14  -5   3   15.00    1.54
  13   5  -3    1.30    1.06
 -13  -5   3   -0.61    0.85
  12   5  -3   -1.04    0.92
 -12  -5   3    0.05    0.81
  11   5  -3    0.65    0.90
 -11  -5   3    0.29    0.77
  10   5  -3    0.78    0.77
 -10  -5   3   -0.65    0.61
   9   5  -3    3.37    0.83
  -9  -5   3    2.61    0.70
   8   5  -3   29.76    1.51
  -8  -5   3   33.07    1.37
  -8  -5   3   30.40    0.97
   7   5  -3   18.32    1.17
  -7  -5   3   19.11    1.03
   6   5  -3    9.64    0.84
  -6  -5   3    9.39    0.70
   5   5  -3    0.50    0.50
  -5  -5   3    0.53    0.35
   4   5  -3   55.26    1.67
  -4  -5   3   57.80    1.47
   3   5  -3   86.82    2.18
  -3  -5   3   84.62    1.89
   2   5  -3   23.73    1.07
   1   5  -3    1.25    0.42
   0   5  -3    3.36    0.49
  -1   5  -3    0.40    0.37
  -1   5  -3    0.45    0.32
  -2   5  -3    1.93    0.39
   2  -5   3    2.93    0.49
  -3   5  -3  100.81    2.28
   3  -5   3   99.27    2.41
  -4   5  -3    5.15    0.45
  -4   5  -3    4.93    0.51
   4  -5   3    4.90    0.59
  -5   5  -3  305.21    5.82
  -5   5  -3  289.26    5.69
   5  -5   3  295.52    5.95
  -6   5  -3    0.98    0.37
  -6   5  -3    1.47    0.43
   6  -5   3    1.45    0.48
  -7   5  -3   17.65    0.91
  -7   5  -3   19.17    0.91
   7  -5   3   18.41    1.10
  -8   5  -3    0.89    0.43
  -8   5  -3    1.48    0.44
   8  -5   3    1.09    0.55
  -9   5  -3    0.35    0.48
  -9   5  -3    1.26    0.46
   9  -5   3    1.17    0.66
 -10   5  -3    0.05    0.46
 -10   5  -3    0.80    0.62
  10  -5   3    0.71    0.69
 -11   5  -3   14.65    1.13
 -11   5  -3   16.19    1.04
  11  -5   3   14.71    1.31
 -12   5  -3   11.68    1.34
 -12   5  -3    9.91    1.08
  12  -5   3   11.18    1.33
 -13   5  -3   25.43    1.67
  13  -5   3   26.11    2.03
 -14   5  -3    2.29    0.93
  14  -5   3    4.30    1.25
 -15   5  -3   -0.24    0.92
  15  -5   3    0.01    1.25
 -16   5  -3    2.67    1.16
 -17   5  -3   -0.26    1.20
 -18   5  -3   -1.50    1.22
 -17  -4   3   -1.91    1.17
  16   4  -3   -0.72    1.38
 -16  -4   3   -1.26    1.11
  15   4  -3    0.20    1.18
 -15  -4   3    1.06    1.17
  14   4  -3    2.34    1.16
 -14  -4   3    1.74    1.02
  13   4  -3   10.92    1.40
 -13  -4   3   10.00    1.23
  12   4  -3    0.92    0.98
 -12  -4   3    1.08    0.85
  11   4  -3    2.93    0.93
 -11  -4   3    1.92    0.77
  10   4  -3    0.76    0.75
 -10  -4   3    1.18    0.64
   9   4  -3   10.15    1.06
  -9  -4   3   10.98    0.92
   8   4  -3    0.71    0.59
  -8  -4   3    0.58    0.49
  -8  -4   3    0.82    0.28
   7   4  -3   28.00    1.34
  -7  -4   3   26.98    0.81
  -7  -4   3   26.66    1.16
   6   4  -3    1.82    0.53
  -6  -4   3    1.66    0.44
   5   4  -3    1.61    0.49
  -5  -4   3    1.47    0.39
   4   4  -3   10.85    0.82
  -4  -4   3   12.67    0.68
   3   4  -3   11.42    0.77
  -3  -4   3   10.77    0.58
   2   4  -3    3.66    0.49
  -2  -4   3    2.84    0.31
   1   4  -3    2.10    0.43
   0   4  -3    7.97    0.64
   0   4  -3    7.26    0.52
  -1   4  -3    2.34    0.36
  -1   4  -3    1.78    0.39
  -2   4  -3   33.66    1.01
   2  -4   3   32.12    1.09
  -3   4  -3    8.85    0.50
  -3   4  -3   10.33    0.64
   3  -4   3    9.29    0.69
  -4   4  -3  271.14    5.20
  -4   4  -3  266.76    5.10
   4  -4   3  266.33    5.31
  -5   4  -3    6.45    0.50
  -5   4  -3    6.09    0.52
   5  -4   3    5.74    0.59
  -6   4  -3   50.35    1.40
  -6   4  -3   50.65    1.42
   6  -4   3   51.26    1.56
  -7   4  -3    1.16    0.42
  -7   4  -3    1.75    0.41
   7  -4   3    0.75    0.48
  -8   4  -3    0.37    0.41
  -8   4  -3    0.82    0.39
   8  -4   3    1.73    0.57
  -9   4  -3   -0.25    0.43
  -9   4  -3   -0.12    0.36
   9  -4   3    0.42    0.59
 -10   4  -3   17.17    1.17
 -10   4  -3   17.06    0.94
  10  -4   3   17.00    1.36
 -11   4  -3    7.92    0.90
 -11   4  -3    6.83    0.68
  11  -4   3    6.58    1.02
 -12   4  -3   61.17    2.22
  12  -4   3   62.72    2.49
 -13   4  -3   16.60    1.35
  13  -4   3   16.67    1.61
 -14   4  -3   12.04    1.28
  14  -4   3    6.55    1.32
 -15   4  -3    0.26    0.94
  15  -4   3    1.37    1.19
 -16   4  -3    4.20    1.22
 -17   4  -3    1.33    1.24
 -18   4  -3    0.56    1.27
 -18  -3   3   13.10    1.92
 -17  -3   3    5.48    1.48
  16   3  -3   35.63    2.51
 -16  -3   3   35.94    2.57
  15   3  -3    4.49    1.30
 -15  -3   3    0.30    1.02
  14   3  -3    3.18    1.12
 -14  -3   3   -0.29    0.91
  13   3  -3   -0.55    0.99
 -13  -3   3   -0.92    0.77
  12   3  -3    5.09    1.12
 -12  -3   3    6.37    1.01
  11   3  -3   -0.73    0.77
 -11  -3   3   -0.78    0.64
  10   3  -3    1.18    0.78
 -10  -3   3    2.28    0.70
   9   3  -3    0.05    0.63
  -9  -3   3    0.03    0.50
   8   3  -3    1.02    0.61
  -8  -3   3    1.98    0.53
   7   3  -3   10.21    0.89
  -7  -3   3    9.34    0.43
  -7  -3   3   10.93    0.81
   6   3  -3   33.97    1.33
  -6  -3   3   34.44    1.21
  -6  -3   3   36.46    0.85
   5   3  -3   41.73    1.38
  -5  -3   3   41.16    1.23
   4   3  -3   10.59    0.80
  -4  -3   3   10.53    0.62
   3   3  -3   28.23    1.03
  -3  -3   3   28.71    0.85
   2   3  -3   10.36    0.69
  -2  -3   3   11.41    0.49
   1   3  -3   39.92    1.11
   1   3  -3   39.20    0.97
  -1  -3   3   39.15    0.84
   0   3  -3   23.13    0.79
   0   3  -3   22.23    0.71
  -1   3  -3  106.37    2.24
  -1   3  -3  105.86    2.19
  -2   3  -3   21.81    0.76
  -2   3  -3   22.51    0.62
   2  -3   3   23.79    0.84
  -3   3  -3   69.01    1.61
  -3   3  -3   67.60    1.49
   3  -3   3   68.44    1.66
  -4   3  -3    8.30    0.56
  -4   3  -3    7.44    0.56
   4  -3   3    7.65    0.58
  -5   3  -3    0.18    0.30
  -5   3  -3   -0.19    0.29
   5  -3   3    0.10    0.35
  -6   3  -3    0.43    0.34
  -6   3  -3    0.19    0.32
   6  -3   3    0.43    0.39
  -7   3  -3   22.88    0.99
  -7   3  -3   24.10    0.92
   7  -3   3   24.29    1.13
  -8   3  -3    0.02    0.33
  -8   3  -3    0.16    0.40
   8  -3   3   -0.60    0.45
  -9   3  -3    0.22    0.35
  -9   3  -3    0.54    0.46
   9  -3   3    0.15    0.56
 -10   3  -3    5.64    0.72
 -10   3  -3    5.01    0.55
  10  -3   3    3.67    0.79
 -11   3  -3   25.99    1.11
 -11   3  -3   28.82    1.46
  11  -3   3   27.70    1.69
 -12   3  -3   23.79    1.50
  12  -3   3   21.62    1.63
 -13   3  -3   30.60    1.82
  13  -3   3   30.50    2.03
 -14   3  -3    6.76    1.11
  14  -3   3    6.79    1.31
 -15   3  -3    0.89    0.96
 -16   3  -3    1.05    1.06
 -17   3  -3   -1.70    1.04
 -18   3  -3    4.16    1.45
 -18  -2   3    3.33    1.51
 -17  -2   3   41.66    2.75
  16   2  -3    5.25    1.42
 -16  -2   3    4.85    1.33
  15   2  -3   13.40    1.60
 -15  -2   3   12.29    1.46
  14   2  -3    0.46    1.05
 -14  -2   3   -0.60    0.84
  13   2  -3    1.06    1.01
 -13  -2   3   -0.06    0.78
  12   2  -3   -0.60    0.89
 -12  -2   3    0.16    0.68
  11   2  -3   -1.38    0.71
 -11  -2   3   -0.10    0.62
  10   2  -3    6.20    0.96
 -10  -2   3    5.92    0.79
   9   2  -3   88.01    2.63
  -9  -2   3   97.69    2.51
   8   2  -3   27.53    1.37
  -8  -2   3   29.03    1.23
   7   2  -3    4.53    0.70
  -7  -2   3    5.79    0.61
   6   2  -3   -0.06    0.44
  -6  -2   3    0.13    0.36
   5   2  -3   21.93    1.01
  -5  -2   3   20.06    0.85
   4   2  -3    1.28    0.41
  -4  -2   3    1.34    0.33
   3   2  -3    4.07    0.46
  -3  -2   3    3.78    0.35
   2   2  -3    8.75    0.57
   2   2  -3    8.87    0.36
  -2  -2   3    9.02    0.41
   1   2  -3   11.06    0.53
   1   2  -3   11.34    0.40
  -1  -2   3   11.24    0.34
   0   2  -3   10.44    0.47
   0   2  -3   11.46    0.44
  -1   2  -3    0.29    0.20
  -1   2  -3    0.51    0.12
  -1   2  -3    0.31    0.19
  -2   2  -3   62.06    1.28
  -2   2  -3   62.63    1.38
   2  -2   3   60.00    1.38
  -3   2  -3    0.37    0.29
  -3   2  -3    0.78    0.25
   3  -2   3    0.71    0.27
  -4   2  -3    1.24    0.32
  -4   2  -3    0.93    0.30
   4  -2   3    1.28    0.33
  -5   2  -3    1.58    0.37
  -5   2  -3    1.49    0.34
   5  -2   3    2.05    0.40
  -6   2  -3   31.07    1.00
  -6   2  -3   32.83    1.13
   6  -2   3   33.92    1.15
  -7   2  -3    2.39    0.45
  -7   2  -3    2.45    0.40
   7  -2   3    2.79    0.55
  -8   2  -3    9.34    0.66
  -8   2  -3   11.80    0.87
   8  -2   3   11.27    0.87
  -9   2  -3    1.21    0.40
  -9   2  -3    1.47    0.50
   9  -2   3    0.88    0.59
 -10   2  -3    0.75    0.55
 -10   2  -3    0.00    0.38
  10  -2   3    0.95    0.69
 -11   2  -3    0.30    0.42
 -11   2  -3    1.19    0.65
  11  -2   3    0.98    0.80
 -12   2  -3    3.47    0.82
  12  -2   3    4.42    1.07
 -13   2  -3   -0.31    0.74
  13  -2   3   -0.26    1.01
 -14   2  -3    1.09    0.89
  14  -2   3    1.66    1.14
 -15   2  -3    3.22    1.02
 -16   2  -3    0.28    1.05
 -17   2  -3   -0.47    1.08
 -18   2  -3    1.94    1.34
 -18  -1   3   12.86    1.86
  17   1  -3    3.73    1.57
 -17  -1   3    1.66    1.24
  16   1  -3   16.36    1.77
 -16  -1   3   17.64    1.69
  15   1  -3   -1.01    1.14
 -15  -1   3   -0.41    0.99
  14   1  -3   -1.09    1.01
 -14  -1   3    0.67    0.85
  13   1  -3    1.19    1.08
 -13  -1   3    0.17    0.79
  12   1  -3   -1.28    0.89
 -12  -1   3    1.03    0.73
  11   1  -3    1.10    0.91
 -11  -1   3    2.45    0.70
  10   1  -3  117.72    3.27
 -10  -1   3  122.07    3.05
   9   1  -3   10.83    1.05
  -9  -1   3   12.52    0.93
   8   1  -3  144.93    3.44
  -8  -1   3  141.94    3.26
   7   1  -3    2.68    0.60
  -7  -1   3    1.67    0.47
   6   1  -3    0.66    0.48
  -6  -1   3    1.09    0.39
   5   1  -3    8.65    0.71
  -5  -1   3    7.79    0.56
   4   1  -3    0.73    0.43
  -4  -1   3    0.98    0.32
   3   1  -3    8.63    0.66
  -3  -1   3    9.94    0.52
   2   1  -3   70.00    1.57
   2   1  -3   68.93    1.32
  -2  -1   3   70.79    1.44
   1   1  -3  161.74    2.94
   1   1  -3  161.09    3.05
  -1  -1   3  155.41    2.92
   0   1  -3   22.06    0.55
  -1   1  -3    0.00    0.14
  -1   1  -3    0.18    0.12
  -2   1  -3    3.87    0.31
  -2   1  -3    3.87    0.27
   2  -1   3    3.63    0.29
  -3   1  -3   82.23    1.75
  -3   1  -3   81.43    1.74
   3  -1   3   82.23    1.70
  -4   1  -3   -0.49    0.28
  -4   1  -3   -0.15    0.27
   4  -1   3    0.21    0.28
  -5   1  -3    1.44    0.37
  -5   1  -3    1.85    0.34
   5  -1   3    1.76    0.38
  -6   1  -3   -0.51    0.33
  -6   1  -3    0.08    0.30
   6  -1   3    0.24    0.38
  -7   1  -3    1.37    0.36
  -7   1  -3    1.98    0.47
   7  -1   3    2.02    0.48
  -8   1  -3   -0.01    0.32
  -8   1  -3    0.29    0.41
   8  -1   3   -0.07    0.45
  -9   1  -3    5.22    0.67
  -9   1  -3    6.17    0.53
   9  -1   3    5.84    0.76
 -10   1  -3    2.01    0.43
 -10   1  -3    1.51    0.61
  10  -1   3    3.04    0.76
 -11   1  -3   14.29    1.13
  11  -1   3   13.52    1.24
 -12   1  -3    1.41    0.74
  12  -1   3    2.05    0.96
 -13   1  -3    3.22    0.88
  13  -1   3    3.14    1.12
 -14   1  -3    1.02    0.84
  14  -1   3    2.64    1.10
 -15   1  -3    2.90    1.08
 -16   1  -3   -0.17    1.07
 -17   1  -3    0.73    1.22
 -18   1  -3    0.39    1.31
 -18   0   3    1.77    1.30
  17   0  -3    0.01    1.32
 -17   0   3    1.34    1.19
  16   0  -3    1.75    1.31
 -16   0   3   -0.13    1.03
  15   0  -3    7.64    1.50
 -15   0   3    7.54    1.28
  14   0  -3   -0.42    1.12
 -14   0   3    0.99    0.87
  13   0  -3   23.02    1.83
 -13   0   3   26.69    1.75
  12   0  -3   -0.14    0.96
 -12   0   3    1.32    0.73
  11   0  -3    1.27    0.91
 -11   0   3    1.73    0.68
  10   0  -3    3.42    0.86
 -10   0   3    2.35    0.64
   9   0  -3   96.87    2.76
  -9   0   3   96.68    2.53
   8   0  -3    9.04    0.90
  -8   0   3    9.02    0.78
   7   0  -3    0.40    0.50
  -7   0   3    0.41    0.41
   6   0  -3    2.36    0.54
  -6   0   3    3.29    0.46
   5   0  -3    3.26    0.49
  -5   0   3    3.58    0.43
   4   0  -3   20.66    0.91
  -4   0   3   19.84    0.78
   3   0  -3   27.82    0.92
  -3   0   3   27.08    0.81
   2   0  -3  379.97    6.79
  -2   0   3  379.58    6.91
   1   0  -3   75.07    1.33
   1   0  -3   59.35    1.37
   0   0  -3    0.26    0.10
   0   0  -3    0.10    0.07
  -1   0  -3    0.36    0.16
  -2   0  -3   33.57    0.86
   2   0   3   31.73    0.69
  -3   0  -3    1.83    0.32
  -3   0  -3    1.57    0.34
   3   0   3    1.36    0.25
  -4   0  -3    0.97    0.35
  -4   0  -3    0.74    0.32
   4   0   3    0.77    0.30
  -5   0  -3    0.17    0.33
  -5   0  -3    0.46    0.33
   5   0   3   -0.09    0.32
  -6   0  -3  181.26    3.60
  -6   0  -3  184.95    3.80
   6   0   3  179.15    3.71
  -7   0  -3    4.57    0.47
  -7   0  -3    4.48    0.56
   7   0   3    4.49    0.57
  -8   0  -3   31.23    1.28
  -8   0  -3   31.50    1.03
   8   0   3   33.52    1.31
  -9   0  -3    0.73    0.38
  -9   0  -3    0.21    0.47
   9   0   3    1.01    0.59
 -10   0  -3   18.43    0.87
 -10   0  -3   17.09    1.19
  10   0   3   18.70    1.32
 -11   0  -3   11.57    1.04
  11   0   3   13.25    1.20
 -12   0  -3    2.53    0.82
  12   0   3    4.24    0.98
 -13   0  -3   -0.23    0.80
  13   0   3    1.40    1.00
 -14   0  -3   -1.65    0.81
 -15   0  -3    0.88    0.93
 -16   0  -3   -0.21    1.03
 -17   0  -3    0.73    1.24
 -18   0  -3    1.09    1.40
 -18   1   3   -0.08    1.18
  17  -1  -3   -0.15    1.33
 -17   1   3    0.13    1.10
  16  -1  -3    6.48    1.55
 -16   1   3    4.54    1.21
  15  -1  -3    1.00    1.24
 -15   1   3   -0.36    0.90
  14  -1  -3   11.32    1.58
 -14   1   3   11.49    1.25
  13  -1  -3    0.16    1.08
 -13   1   3   -0.04    0.77
  12  -1  -3    0.90    0.99
 -12   1   3    1.25    0.73
  11  -1  -3    0.35    0.82
 -11   1   3    1.22    0.64
  10  -1  -3    3.98    0.87
 -10   1   3    3.66    0.68
   9  -1  -3    1.30    0.69
  -9   1   3    1.82    0.55
   8  -1  -3    6.23    0.81
  -8   1   3    5.79    0.66
   7  -1  -3   19.52    1.12
  -7   1   3   18.86    0.97
   6  -1  -3   17.62    1.01
  -6   1   3   16.86    0.86
   5  -1  -3   13.91    0.85
  -5   1   3   11.96    0.72
   4  -1  -3   10.90    0.73
  -4   1   3   10.62    0.62
   3  -1  -3   19.45    0.76
  -3   1   3   17.74    0.66
   2  -1  -3   96.98    2.01
   1  -1  -3  125.26    2.41
   0  -1  -3   18.94    0.48
   0  -1  -3   20.31    0.53
  -1  -1  -3    7.86    0.25
  -2  -1  -3    0.14    0.20
   2   1   3    0.23    0.14
  -3  -1  -3 1000.00   17.74
   3   1   3  974.17   17.60
  -4  -1  -3    0.35    0.33
  -4  -1  -3   -0.16    0.31
   4   1   3    0.09    0.29
  -5  -1  -3  230.99    4.68
  -5  -1  -3  235.82    4.58
   5   1   3  240.86    4.57
  -6  -1  -3    6.64    0.54
  -6  -1  -3    6.55    0.62
   6   1   3    6.78    0.61
  -7  -1  -3  167.16    3.49
  -7  -1  -3  169.89    3.72
   7   1   3  176.56    3.65
  -8  -1  -3    4.06    0.58
  -8  -1  -3    3.98    0.49
   8   1   3    2.51    0.58
  -9  -1  -3   10.07    0.87
  -9  -1  -3   10.20    0.74
   9   1   3    9.63    0.89
 -10  -1  -3    4.58    0.54
 -10  -1  -3    4.42    0.71
  10   1   3    4.83    0.80
 -11  -1  -3   11.84    1.08
  11   1   3   11.36    1.12
 -12  -1  -3    2.89    0.86
  12   1   3    3.84    0.97
 -13  -1  -3    9.79    1.22
  13   1   3   13.25    1.33
 -14  -1  -3   31.20    2.02
 -15  -1  -3    2.35    1.07
 -16  -1  -3    4.51    1.26
 -17  -1  -3   -0.52    1.16
 -18  -1  -3    9.65    1.81
  18  -2  -3   -0.02    1.82
 -18   2   3   -0.15    1.24
  17  -2  -3    2.53    1.51
 -17   2   3    1.07    1.19
  16  -2  -3    1.53    1.41
 -16   2   3    1.76    1.07
  15  -2  -3    0.28    1.32
 -15   2   3    1.49    1.00
  14  -2  -3   -1.79    1.17
 -14   2   3    3.33    0.95
  13  -2  -3    0.61    1.16
 -13   2   3   -0.56    0.78
  12  -2  -3    0.44    0.99
 -12   2   3    1.53    0.76
  11  -2  -3    9.02    1.16
 -11   2   3    8.27    0.95
  10  -2  -3    0.59    0.74
 -10   2   3    0.99    0.57
   9  -2  -3   29.23    1.55
  -9   2   3   28.07    1.31
   8  -2  -3    7.22    0.85
  -8   2   3    7.17    0.72
   7  -2  -3   37.26    1.45
  -7   2   3   39.60    1.35
   6  -2  -3    7.15    0.69
  -6   2   3    7.27    0.60
   5  -2  -3   11.19    0.82
  -5   2   3   10.59    0.70
   4  -2  -3    0.34    0.36
   3  -2  -3    2.87    0.39
   2  -2  -3   12.29    0.57
   1  -2  -3    0.38    0.20
   0  -2  -3    5.19    0.34
  -2  -2  -3   21.65    0.69
   2   2   3   20.80    0.63
  -3  -2  -3    0.26    0.27
   3   2   3    0.13    0.25
  -4  -2  -3   61.89    1.47
   4   2   3   60.20    1.42
  -5  -2  -3    0.67    0.33
  -5  -2  -3    0.19    0.38
   5   2   3    0.14    0.32
  -6  -2  -3  163.33    3.37
  -6  -2  -3  163.49    3.52
   6   2   3  160.88    3.35
  -7  -2  -3    6.05    0.65
  -7  -2  -3    7.05    0.62
   7   2   3    4.76    0.57
  -8  -2  -3   15.44    0.87
  -8  -2  -3   17.32    1.08
   8   2   3   14.45    0.94
  -9  -2  -3    1.44    0.58
  -9  -2  -3    3.17    0.55
   9   2   3    2.73    0.60
 -10  -2  -3    8.91    0.81
 -10  -2  -3    8.73    0.93
  10   2   3    9.50    0.92
 -11  -2  -3    0.49    0.65
  11   2   3   -0.15    0.66
 -12  -2  -3   15.63    1.29
  12   2   3   20.99    1.50
 -13  -2  -3   36.63    2.08
  13   2   3   42.69    2.05
 -14  -2  -3   44.32    2.33
 -15  -2  -3   18.95    1.74
 -16  -2  -3    1.87    1.23
 -17  -2  -3    3.83    1.45
 -18  -2  -3    0.15    1.43
  18  -3  -3    3.10    1.68
 -18   3   3   -0.91    1.19
  17  -3  -3    1.15    1.48
 -17   3   3   -0.29    1.07
  16  -3  -3   28.77    2.39
 -16   3   3   24.85    1.98
  15  -3  -3   -0.23    1.30
 -15   3   3    2.14    0.99
  14  -3  -3   69.33    2.99
 -14   3   3   64.64    2.50
  13  -3  -3   -0.01    1.08
 -13   3   3   -0.24    0.78
  12  -3  -3    2.08    1.03
 -12   3   3    0.49    0.74
  11  -3  -3    2.32    0.96
 -11   3   3    0.45    0.70
  10  -3  -3    3.41    0.86
 -10   3   3    2.42    0.68
   9  -3  -3    0.75    0.65
  -9   3   3    0.48    0.51
   8  -3  -3    2.33    0.66
  -8   3   3    2.53    0.56
   7  -3  -3    4.32    0.66
  -7   3   3    4.66    0.60
   6  -3  -3    9.13    0.77
  -6   3   3    9.58    0.69
   5  -3  -3    1.99    0.45
   4  -3  -3    1.33    0.39
   3  -3  -3   32.27    1.07
   2  -3  -3    2.30    0.37
   1  -3  -3   27.56    0.87
   0  -3  -3    0.28    0.25
   2   3   3    0.57    0.29
  -3  -3  -3    0.06    0.28
   3   3   3    0.48    0.31
  -4  -3  -3    0.18    0.29
   4   3   3   -0.07    0.30
  -5  -3  -3    0.70    0.34
   5   3   3    0.80    0.36
  -6  -3  -3   -0.04    0.40
  -6  -3  -3    0.71    0.36
   6   3   3    0.39    0.38
  -7  -3  -3    0.01    0.38
  -7  -3  -3    0.03    0.45
   7   3   3   -0.08    0.41
  -8  -3  -3    1.31    0.54
  -8  -3  -3    1.71    0.50
   8   3   3    2.31    0.54
  -9  -3  -3   27.40    1.20
  -9  -3  -3   30.22    1.40
   9   3   3   31.31    1.34
 -10  -3  -3    2.19    0.68
  10   3   3    4.50    0.75
 -11  -3  -3    1.13    0.73
  11   3   3    0.71    0.72
 -12  -3  -3    7.32    1.04
  12   3   3    7.72    1.07
 -13  -3  -3   18.91    1.57
 -14  -3  -3   22.15    1.77
 -15  -3  -3    2.20    1.16
 -16  -3  -3    0.16    1.23
 -17  -3  -3    2.49    1.45
  18  -4  -3    0.78    1.65
 -18   4   3   -0.33    1.22
  17  -4  -3    1.14    1.60
 -17   4   3    5.25    1.40
  16  -4  -3    1.51    1.51
 -16   4   3    1.29    1.13
  15  -4  -3   98.95    3.73
 -15   4   3   99.00    3.26
  14  -4  -3   -0.93    1.14
 -14   4   3    0.03    0.89
  13  -4  -3    7.61    1.38
 -13   4   3    6.13    1.06
  12  -4  -3    3.57    1.11
 -12   4   3    1.32    0.78
  11  -4  -3   31.82    1.85
 -11   4   3   33.40    1.70
  10  -4  -3   -0.61    0.68
 -10   4   3    0.66    0.60
   9  -4  -3   11.28    1.03
  -9   4   3   12.50    0.98
   8  -4  -3   28.39    1.43
  -8   4   3   29.19    1.26
   7  -4  -3   81.19    2.27
   6  -4  -3   40.67    1.46
   5  -4  -3    0.72    0.43
   4  -4  -3   13.87    0.83
   3  -4  -3   29.74    1.09
   2  -4  -3   13.17    0.74
   1  -4  -3    1.73    0.38
   0  -4  -3    0.58    0.32
   2   4   3   14.64    0.74
   3   4   3    1.94    0.40
  -4  -4  -3   37.48    1.12
   4   4   3   36.65    1.15
  -5  -4  -3    0.70    0.37
   5   4   3    0.25    0.36
  -6  -4  -3   16.82    0.99
  -6  -4  -3   18.96    0.88
   6   4   3   18.75    0.92
  -7  -4  -3    0.55    0.49
  -7  -4  -3   -0.16    0.38
   7   4   3    0.00    0.41
  -8  -4  -3   -0.31    0.48
  -8  -4  -3    0.44    0.44
   8   4   3    0.06    0.46
  -9  -4  -3   -0.24    0.51
  -9  -4  -3    0.11    0.57
   9   4   3    1.09    0.55
 -10  -4  -3    0.66    0.67
  10   4   3    1.08    0.64
 -11  -4  -3   -0.38    0.69
  11   4   3    0.67    0.71
 -12  -4  -3    0.89    0.82
  12   4   3    0.70    0.79
 -13  -4  -3   -0.33    0.84
 -14  -4  -3    5.12    1.24
 -15  -4  -3   -0.64    1.13
 -16  -4  -3    0.44    1.28
 -17  -4  -3    1.46    1.43
  18  -5  -3    1.82    1.67
  17  -5  -3    0.07    1.52
 -17   5   3   -1.93    1.09
  16  -5  -3   22.76    2.21
 -16   5   3   24.76    1.92
  15  -5  -3    1.67    1.35
 -15   5   3    1.23    1.04
  14  -5  -3   20.17    1.96
 -14   5   3   15.92    1.46
  13  -5  -3    0.52    1.10
 -13   5   3   -1.29    0.77
  12  -5  -3    9.70    1.34
 -12   5   3    8.24    1.10
  11  -5  -3    0.69    0.85
 -11   5   3    1.41    0.73
  10  -5  -3    1.14    0.78
   9  -5  -3   17.69    1.39
   8  -5  -3  138.07    3.43
   7  -5  -3   98.05    2.62
   6  -5  -3   55.61    1.78
   5  -5  -3    0.32    0.42
   4  -5  -3    1.90    0.48
   3  -5  -3    8.10    0.69
   2  -5  -3    7.48    0.64
   1  -5  -3  105.07    2.46
   0  -5  -3   20.95    0.93
   2   5   3    7.57    0.61
   3   5   3    8.66    0.66
   4   5   3    2.69    0.48
  -5  -5  -3   40.76    1.28
   5   5   3   38.91    1.32
  -6  -5  -3    3.15    0.51
   6   5   3    3.60    0.55
  -7  -5  -3    4.16    0.65
  -7  -5  -3    2.96    0.53
   7   5   3    2.27    0.52
  -8  -5  -3    0.63    0.57
  -8  -5  -3    0.35    0.48
   8   5   3    0.49    0.51
  -9  -5  -3    1.60    0.68
  -9  -5  -3    0.96    0.54
   9   5   3    1.05    0.60
 -10  -5  -3    0.47    0.68
  10   5   3    0.18    0.61
 -11  -5  -3    2.78    0.90
  11   5   3    1.98    0.79
 -12  -5  -3    8.57    1.15
  12   5   3    8.19    1.16
 -13  -5  -3    3.33    1.07
 -14  -5  -3    3.15    1.20
 -15  -5  -3    0.68    1.29
 -16  -5  -3   -0.90    1.25
 -17  -5  -3   -0.36    1.43
  18  -6  -3   -2.18    1.65
  17  -6  -3   -0.14    1.50
  16  -6  -3    0.55    1.40
  15  -6  -3   -1.16    1.19
  14  -6  -3    1.70    1.20
  13  -6  -3   11.92    1.53
  12  -6  -3    1.90    1.01
  11  -6  -3    4.98    1.06
  10  -6  -3    2.87    0.88
   9  -6  -3    8.72    1.00
   8  -6  -3   14.80    1.18
   7  -6  -3   30.36    1.43
   6  -6  -3    2.75    0.61
   5  -6  -3    9.06    0.82
   4  -6  -3   43.48    1.52
   3  -6  -3    4.29    0.59
   2  -6  -3   23.34    1.07
   1  -6  -3    9.79    0.77
   0  -6  -3  254.39    5.21
  -1  -6  -3    0.94    0.46
   2   6   3   56.83    1.64
   3   6   3   -0.36    0.40
   4   6   3   38.17    1.36
   5   6   3    0.60    0.47
  -6  -6  -3   13.19    0.88
   6   6   3   13.12    0.95
  -7  -6  -3   11.99    0.96
  -7  -6  -3   13.32    0.91
   7   6   3   13.03    0.99
  -8  -6  -3   61.75    2.08
  -8  -6  -3   62.74    1.89
   8   6   3   61.33    1.94
  -9  -6  -3   11.73    0.93
  -9  -6  -3   14.40    1.15
   9   6   3   12.66    1.04
 -10  -6  -3    9.88    1.13
  10   6   3    7.95    0.96
 -11  -6  -3    0.87    0.82
  11   6   3    0.27    0.72
 -12  -6  -3    6.92    1.15
 -13  -6  -3    5.09    1.21
 -14  -6  -3   -0.98    1.15
 -15  -6  -3    3.38    1.40
 -16  -6  -3    2.42    1.49
  17  -7  -3    0.82    1.55
  16  -7  -3    1.31    1.51
  15  -7  -3   -0.03    1.31
  14  -7  -3    7.50    1.49
  13  -7  -3   -1.13    1.04
  12  -7  -3    0.34    0.98
  11  -7  -3   -0.02    0.90
  10  -7  -3   -0.09    0.78
   9  -7  -3    0.88    0.68
   8  -7  -3    0.83    0.63
   7  -7  -3    7.97    0.91
   6  -7  -3    0.60    0.49
   5  -7  -3   12.83    1.02
   4  -7  -3    8.63    0.81
   3  -7  -3    6.19    0.69
   2  -7  -3    2.08    0.53
   1  -7  -3   57.01    1.78
   0  -7  -3   10.20    0.85
  -1  -7  -3   63.84    1.91
   2   7   3    1.08    0.51
   3   7   3   26.78    1.22
   4   7   3    3.50    0.61
   5   7   3    0.29    0.50
   6   7   3    1.57    0.58
  -7  -7  -3   69.16    2.18
  -7  -7  -3   69.24    2.06
   7   7   3   72.00    2.16
  -8  -7  -3   11.14    1.05
  -8  -7  -3   12.40    0.95
   8   7   3   11.92    1.02
  -9  -7  -3   25.50    1.43
  -9  -7  -3   29.56    1.66
   9   7   3   26.35    1.48
 -10  -7  -3    2.71    0.83
  10   7   3    2.42    0.78
 -11  -7  -3    0.37    0.86
  11   7   3    2.14    0.81
 -12  -7  -3    3.56    1.08
 -13  -7  -3   -0.47    1.04
 -14  -7  -3   -0.23    1.20
 -15  -7  -3   -0.84    1.30
 -16  -7  -3   15.84    2.01
  17  -8  -3   -0.51    1.61
  16  -8  -3   -1.40    1.29
  15  -8  -3   -0.50    1.30
  14  -8  -3    0.47    1.20
  13  -8  -3   13.53    1.68
  12  -8  -3    0.43    1.05
  11  -8  -3   -1.08    0.83
  10  -8  -3    6.27    1.07
   9  -8  -3   13.99    1.25
   8  -8  -3    8.27    0.99
   7  -8  -3    0.18    0.55
   6  -8  -3    3.03    0.67
   5  -8  -3    4.01    0.73
   4  -8  -3   19.49    1.18
   3  -8  -3    4.19    0.69
   2  -8  -3   14.17    1.06
   1  -8  -3   -0.88    0.40
   0  -8  -3    2.50    0.60
  -1  -8  -3   -0.11    0.48
   3   8   3    0.24    0.52
   4   8   3   29.26    1.37
   5   8   3    2.39    0.65
   6   8   3    8.48    0.93
  -7  -8  -3    9.24    0.93
   7   8   3   11.27    1.02
  -8  -8  -3   23.66    1.33
  -8  -8  -3   21.63    1.49
   8   8   3   23.33    1.44
  -9  -8  -3    5.89    0.98
   9   8   3    3.90    0.87
 -10  -8  -3    0.56    0.79
  10   8   3    1.84    0.82
 -11  -8  -3    1.70    0.97
  11   8   3    0.73    0.86
 -12  -8  -3    1.04    1.02
 -13  -8  -3    3.80    1.27
 -14  -8  -3    3.99    1.42
 -15  -8  -3   31.87    2.49
  17  -9  -3   -3.54    1.44
  16  -9  -3   -0.86    1.40
  15  -9  -3   -1.89    1.26
  14  -9  -3   37.22    2.59
  13  -9  -3    5.41    1.40
  12  -9  -3   25.00    2.02
  11  -9  -3    0.74    0.94
  10  -9  -3    3.59    0.97
   9  -9  -3    0.38    0.74
   8  -9  -3   -0.84    0.62
   7  -9  -3    8.19    0.97
   6  -9  -3   11.12    1.11
   5  -9  -3   22.76    1.35
   4  -9  -3    1.75    0.60
   3  -9  -3    0.35    0.52
   2  -9  -3    1.82    0.60
   1  -9  -3   12.59    1.05
   0  -9  -3    0.47    0.54
  -1  -9  -3    0.83    0.57
   3   9   3    3.26    0.71
   4   9   3    3.51    0.74
   5   9   3    1.07    0.67
   6   9   3    0.56    0.67
   7   9   3    1.58    0.76
  -8  -9  -3   -1.05    0.69
  -8  -9  -3    0.09    0.62
   8   9   3   -0.20    0.73
  -9  -9  -3    1.10    0.82
   9   9   3    0.67    0.76
 -10  -9  -3    2.25    0.94
  10   9   3    3.08    0.93
 -11  -9  -3    3.94    1.07
 -12  -9  -3    5.69    1.26
 -13  -9  -3    0.48    1.12
 -14  -9  -3    1.69    1.35
 -15  -9  -3    2.47    1.49
  16 -10  -3   -0.96    1.46
  15 -10  -3   14.36    2.01
  14 -10  -3   -2.24    1.19
  13 -10  -3   32.09    2.34
  12 -10  -3    0.60    1.06
  11 -10  -3    0.67    0.96
  10 -10  -3    2.57    0.99
   9 -10  -3    1.90    0.85
   8 -10  -3    0.61    0.73
   7 -10  -3   20.70    1.52
   6 -10  -3   37.16    1.81
   5 -10  -3   22.61    1.45
   4 -10  -3   22.35    1.41
   3 -10  -3    0.86    0.58
   2 -10  -3   31.25    1.59
   1 -10  -3   -0.51    0.52
   0 -10  -3    1.08    0.65
  -1 -10  -3    0.24    0.60
  -2 -10  -3   11.33    1.10
   3  10   3    0.57    0.66
   4  10   3    0.33    0.65
   5  10   3    0.24    0.69
   6  10   3   16.47    1.33
   7  10   3    1.41    0.86
  -8 -10  -3    2.01    0.78
  -8 -10  -3    3.46    0.92
   8  10   3    3.20    0.93
  -9 -10  -3    1.53    0.88
   9  10   3   -0.44    0.80
 -10 -10  -3    0.80    0.91
  10  10   3    0.28    0.83
 -11 -10  -3    0.64    1.01
 -12 -10  -3    1.77    1.18
 -13 -10  -3   -0.61    1.16
 -14 -10  -3   -0.87    1.30
  16 -11  -3   -1.80    1.57
  15 -11  -3    1.64    1.48
  14 -11  -3    6.38    1.60
  13 -11  -3    2.30    1.29
  12 -11  -3    0.18    1.09
  11 -11  -3   -0.46    0.91
  10 -11  -3   15.01    1.47
   9 -11  -3    1.28    0.88
   8 -11  -3    2.13    0.85
   7 -11  -3   30.35    1.82
   6 -11  -3   23.44    1.65
   5 -11  -3   63.98    2.38
   4 -11  -3    7.15    1.00
   3 -11  -3    0.54    0.63
   2 -11  -3    1.69    0.74
   1 -11  -3    2.15    0.74
   0 -11  -3    0.69    0.71
  -1 -11  -3  111.98    3.27
  -2 -11  -3   -0.27    0.72
   4  11   3    1.24    0.77
   5  11   3    2.05    0.84
   6  11   3    5.08    1.01
   7  11   3    6.09    1.09
  -8 -11  -3    0.45    0.78
  -8 -11  -3    0.10    0.75
   8  11   3    0.09    0.87
  -9 -11  -3    7.09    1.20
   9  11   3   11.59    1.34
 -10 -11  -3    2.96    1.08
  10  11   3    2.49    1.34
 -11 -11  -3    1.10    1.06
 -12 -11  -3    1.00    1.16
 -13 -11  -3   -1.36    1.23
 -14 -11  -3    4.69    1.60
  15 -12  -3   -1.71    1.46
  14 -12  -3    0.32    1.36
  13 -12  -3    0.27    1.34
  12 -12  -3    0.03    1.13
  11 -12  -3    4.67    1.26
  10 -12  -3    7.62    1.28
   9 -12  -3   -0.19    0.86
   8 -12  -3    1.14    0.85
   7 -12  -3   10.82    1.30
   6 -12  -3    9.98    1.22
   5 -12  -3    6.13    1.01
   4 -12  -3    0.44    0.71
   3 -12  -3   -0.12    0.66
   2 -12  -3   27.44    1.80
   1 -12  -3   -0.37    0.69
   0 -12  -3   25.22    1.77
  -1 -12  -3   -0.82    0.76
  -2 -12  -3  102.31    3.28
  -3 -12  -3    0.33    0.87
   5  12   3   -1.13    0.80
   6  12   3   18.76    1.56
   7  12   3    1.98    0.97
  -8 -12  -3    5.17    1.07
   8  12   3    8.05    1.23
  -9 -12  -3   27.04    1.99
   9  12   3   30.44    2.09
 -10 -12  -3   18.33    1.76
 -11 -12  -3   12.00    1.58
 -12 -12  -3    0.70    1.26
 -13 -12  -3    3.34    1.47
  15 -13  -3    0.01    1.57
  14 -13  -3    0.77    1.46
  13 -13  -3   -0.88    1.30
  12 -13  -3    0.26    1.28
  11 -13  -3    0.17    1.12
  10 -13  -3    2.67    1.19
   9 -13  -3    0.57    0.95
   8 -13  -3    2.41    0.99
   7 -13  -3    0.04    0.81
   6 -13  -3    0.94    0.86
   5 -13  -3    1.97    0.91
   4 -13  -3    2.69    0.93
   3 -13  -3   23.46    1.77
   2 -13  -3    1.22    0.90
   1 -13  -3   -1.06    0.77
   0 -13  -3   -0.01    0.83
  -1 -13  -3   39.44    2.18
  -2 -13  -3    0.05    0.87
  -3 -13  -3   15.92    1.58
   6  13   3    1.80    1.00
   7  13   3    1.38    1.00
  -8 -13  -3   10.64    1.31
   8  13   3    8.94    1.39
  -9 -13  -3   52.61    2.58
   9  13   3   53.04    2.77
 -10 -13  -3   25.21    2.11
 -11 -13  -3    8.73    1.55
 -12 -13  -3   -0.81    1.24
  14 -14  -3   -2.92    1.37
  13 -14  -3    6.74    1.64
  12 -14  -3    1.37    1.37
  11 -14  -3    4.66    1.42
  10 -14  -3    0.22    1.12
   9 -14  -3    1.53    1.07
   8 -14  -3    0.67    0.99
   7 -14  -3   -0.07    0.90
   6 -14  -3    5.79    1.18
   5 -14  -3    0.52    0.85
   4 -14  -3    1.95    0.98
   3 -14  -3    0.82    0.87
   2 -14  -3    4.30    1.14
   1 -14  -3    1.40    0.93
   0 -14  -3    0.55    0.96
  -1 -14  -3    1.20    1.04
  -2 -14  -3   12.55    1.57
  -3 -14  -3    2.13    1.07
  -4 -14  -3   12.16    1.54
   7  14   3    0.40    1.05
  -8 -14  -3    7.14    1.29
   8  14   3    3.48    1.27
  -9 -14  -3    8.15    1.44
 -10 -14  -3    2.80    1.41
  13 -15  -3    3.51    1.57
  12 -15  -3   33.36    2.71
  11 -15  -3   12.89    1.84
  10 -15  -3    6.69    1.48
   9 -15  -3   -0.69    1.03
   8 -15  -3    4.49    1.27
   7 -15  -3    7.35    1.41
   6 -15  -3    0.07    0.98
   5 -15  -3    7.66    1.33
   4 -15  -3    0.41    0.97
   3 -15  -3    7.94    1.43
   2 -15  -3    0.17    0.98
   1 -15  -3    1.88    1.11
   0 -15  -3    0.21    1.03
  -1 -15  -3    6.43    1.38
  -2 -15  -3   -0.08    1.09
  -3 -15  -3    3.80    1.29
  -4 -15  -3    0.93    1.15
  -5 -15  -3   -0.68    1.09
   8  15   3   -0.76    1.12
  12 -16  -3   15.16    2.11
  11 -16  -3   21.58    2.18
  10 -16  -3    4.90    1.51
   9 -16  -3   -0.70    1.13
   8 -16  -3    6.13    1.47
   7 -16  -3    0.18    1.14
   6 -16  -3    7.42    1.48
   5 -16  -3   10.88    1.66
   4 -16  -3   80.34    3.42
   3 -16  -3    5.26    1.40
   2 -16  -3    7.43    1.45
   1 -16  -3   -0.08    1.12
   0 -16  -3   11.61    1.67
  -1 -16  -3   -0.15    1.19
  -2 -16  -3    2.23    1.29
  -3 -16  -3   -2.24    1.06
  -4 -16  -3   14.10    1.90
  -5 -16  -3    0.19    1.32
  -6 -16  -3    1.62    1.27
  -7 -16  -3   -0.04    1.26
  10 -17  -3   -0.53    1.33
   9 -17  -3    8.15    1.67
   8 -17  -3    4.82    1.46
   7 -17  -3   -0.01    1.22
   6 -17  -3    5.23    1.49
   5 -17  -3   58.28    3.10
   4 -17  -3    4.25    1.49
   3 -17  -3   34.65    2.60
   2 -17  -3   -1.63    1.15
   1 -17  -3    3.50    1.45
   0 -17  -3    0.29    1.30
  -1 -17  -3    2.83    1.43
  -2 -17  -3    4.54    1.59
  -3 -17  -3   65.60    3.50
  -4 -17  -3    6.81    1.79
  -5 -17  -3   11.69    1.99
  -6 -17  -3    0.04    1.45
  -7 -17  -3    0.33    1.42
   9 -18  -3    3.13    1.54
   8 -18  -3    6.39    1.63
   7 -18  -3    1.32    1.40
   6 -18  -3    4.23    1.50
   5 -18  -3    5.76    1.61
   4 -18  -3   16.73    2.11
   3 -18  -3   -0.60    1.23
   2 -18  -3   -1.55    1.29
   1 -18  -3    1.95    1.44
   0 -18  -3    3.77    1.60
  -1 -18  -3    0.42    1.50
  -2 -18  -3   46.10    3.32
  -3 -18  -3    3.71    1.85
  -4 -18  -3   47.67    3.37
  -5 -18  -3   -0.25    1.53
   6 -19  -3    0.70    1.42
   5 -19  -3   -2.17    1.30
   4 -19  -3   -0.70    1.37
   3 -19  -3    3.81    1.58
   2 -19  -3   -0.37    1.41
   1 -19  -3    3.67    1.69
   0 -19  -3   -0.25    1.57
  -1 -19  -3   -1.68    1.51
  -2 -19  -3    0.23    1.59
  -3 -19   4    0.18    1.54
  -2 -19   4    7.87    2.00
  -1 -19   4   -1.04    1.49
   0 -19   4    2.03    1.47
   1 -19   4    0.13    1.46
   2 -19   4   -1.36    1.38
   3 -19   4    2.69    1.58
   4 -19   4   -0.69    1.31
   5 -19   4    4.49    1.61
   6 -19   4    0.41    1.39
  -4 -18   4   -0.49    1.57
  -3 -18   4    5.93    1.82
  -2 -18   4    1.89    1.57
  -1 -18   4   -0.50    1.42
   0 -18   4    6.84    1.79
   1 -18   4    9.98    1.85
   2 -18   4    5.52    1.67
   3 -18   4   -0.46    1.32
   4 -18   4    1.94    1.40
   5 -18   4    5.85    1.60
   6 -18   4    3.87    1.53
   7 -18   4    0.06    1.34
   8 -18   4   -1.04    1.27
   9 -18   4   -0.09    1.37
   7  17  -4   -1.69    1.26
   6  17  -4   29.41    2.51
  -3 -17   4   -0.16    1.24
  -2 -17   4    0.61    1.33
  -1 -17   4    7.89    1.70
   0 -17   4   53.26    3.17
   1 -17   4   38.47    2.84
   2 -17   4   21.86    2.23
   3 -17   4    7.86    1.62
   4 -17   4    2.35    1.38
   5 -17   4    1.03    1.21
   6 -17   4    0.57    1.17
   7 -17   4    1.23    1.28
   8 -17   4    1.40    1.31
   9 -17   4   21.02    2.22
  10 -17   4    0.60    1.43
   9  16  -4    0.79    1.41
   8  16  -4    0.36    1.32
   7  16  -4    6.75    1.55
   6  16  -4   -1.31    1.11
   5  16  -4    0.79    1.28
   4  16  -4    1.93    1.31
  -2 -16   4    0.41    1.19
  -1 -16   4   14.66    1.86
   0 -16   4   14.74    1.87
   1 -16   4   26.02    2.33
   2 -16   4   11.56    1.67
   3 -16   4   -0.83    1.01
   4 -16   4   -0.20    1.05
   5 -16   4    1.47    1.12
   6 -16   4    0.99    1.13
   7 -16   4    0.82    1.15
   8 -16   4   63.46    3.12
   9 -16   4    0.44    1.26
  10 -16   4   28.09    2.49
  11 -16   4   -1.79    1.21
  12 -16   4    0.96    1.44
  10  15  -4    0.68    1.29
   9  15  -4    3.60    1.40
   8  15  -4    8.19    1.53
   7  15  -4   -0.03    1.16
   6  15  -4    0.90    1.20
   5  15  -4   -1.11    1.05
   4  15  -4   24.24    2.04
   3  15  -4    1.76    1.14
  -1 -15   4    0.67    1.06
   0 -15   4    6.70    1.41
   1 -15   4    4.10    1.23
   2 -15   4   -0.63    0.92
   3 -15   4    0.26    0.95
   4 -15   4    0.80    0.97
   5 -15   4    3.03    1.08
   6 -15   4    0.25    0.96
   7 -15   4   23.79    1.99
   8 -15   4    7.44    1.39
   9 -15   4   41.57    2.65
  10 -15   4    0.67    1.25
  11 -15   4    1.36    1.28
  12 -15   4   -0.45    1.34
  13 -15   4   -2.61    1.23
  11  14  -4    9.44    1.72
  10  14  -4    1.82    1.28
   9  14  -4    4.27    1.36
   8  14  -4    0.64    1.13
   7  14  -4   -0.05    1.08
   6  14  -4   -0.37    1.00
   5  14  -4   -0.28    1.04
   4  14  -4    0.27    1.06
   3  14  -4    8.70    1.40
  -1 -14   4    5.66    1.19
   0 -14   4    6.76    1.27
   1 -14   4    6.59    1.22
   2 -14   4   14.81    1.60
   3 -14   4    9.92    1.34
   4 -14   4   20.19    1.75
   5 -14   4    2.55    1.01
   6 -14   4    1.96    0.97
   7 -14   4   -0.36    0.87
   8 -14   4    6.19    1.29
   9 -14   4   -1.62    0.98
  10 -14   4    2.41    1.22
  11 -14   4    0.56    1.19
  12 -14   4    3.09    1.47
  13 -14   4   -1.58    1.32
  14 -14   4    3.64    1.62
  12  13  -4   35.22    2.72
  11  13  -4    5.72    1.48
  10  13  -4    1.43    1.24
   9  13  -4    0.36    1.10
   8  13  -4    2.85    1.16
   7  13  -4    2.78    1.12
   6  13  -4   33.94    2.19
   5  13  -4    7.10    1.27
   4  13  -4   34.88    2.15
   3  13  -4    2.56    1.04
   2  13  -4    2.55    0.98
   0 -13   4    7.15    1.16
   1 -13   4   -0.17    0.77
   2 -13   4   -0.84    0.76
   3 -13   4    2.00    0.86
   4 -13   4    0.97    0.82
   5 -13   4    5.80    1.08
   6 -13   4    1.75    0.93
   7 -13   4    2.76    1.03
   8 -13   4    0.14    0.88
   9 -13   4   10.40    1.44
  10 -13   4    1.28    1.10
  11 -13   4    8.18    1.54
  12 -13   4   -1.85    1.14
  13 -13   4   -1.14    1.29
  14 -13   4   -1.06    1.30
  13  12  -4   27.27    2.39
  12  12  -4    0.19    1.30
  11  12  -4    7.38    1.51
  10  12  -4   -0.46    1.07
   9  12  -4    5.44    1.31
   8  12  -4    1.00    1.05
   7  12  -4   36.08    2.16
   6  12  -4    2.69    1.04
   5  12  -4  165.74    4.45
   4  12  -4   10.25    1.26
   3  12  -4   16.89    1.47
   2  12  -4   -0.91    0.73
   1  12  -4    4.17    0.95
   0 -12   4    2.28    0.83
   1 -12   4   13.89    1.41
   2 -12   4   56.72    2.41
   3 -12   4   24.77    1.79
   4 -12   4   25.41    1.75
   5 -12   4    1.33    0.76
   6 -12   4   14.07    1.35
   7 -12   4    2.83    0.96
   8 -12   4   20.87    1.71
   9 -12   4    0.78    0.94
  10 -12   4    0.25    0.93
  11 -12   4   -0.39    1.01
  12 -12   4   -0.16    1.13
  13 -12   4    0.53    1.24
  14 -12   4    3.50    1.54
  15 -12   4    1.16    1.61
  14  11  -4    1.12    1.55
 -14 -11   4    1.08    1.37
  13  11  -4   -0.79    1.17
 -13 -11   4   -1.70    1.15
  12  11  -4    1.12    1.25
 -12 -11   4    0.09    1.24
  11  11  -4   -0.23    1.15
 -11 -11   4   -0.37    0.98
  10  11  -4   29.69    2.19
 -10 -11   4   30.30    1.95
   9  11  -4    0.04    0.99
  -9 -11   4   -0.27    0.78
   8  11  -4    2.11    0.99
  -8 -11   4    3.75    0.86
   7  11  -4    1.08    0.93
  -7 -11   4    1.17    0.70
   6  11  -4   81.57    2.80
  -6 -11   4   77.87    2.33
   5  11  -4   10.68    1.23
  -5 -11   4   11.02    0.91
   4  11  -4   30.83    1.75
  -4 -11   4   28.00    1.25
   3  11  -4    1.41    0.75
   2  11  -4    9.49    1.12
   1  11  -4   -0.25    0.66
   1 -11   4   76.23    2.65
   2 -11   4  103.64    3.20
   3 -11   4  245.79    5.78
   4 -11   4   14.90    1.35
   5 -11   4   15.59    1.37
   6 -11   4    2.20    0.78
   7 -11   4    3.85    0.90
   8 -11   4   -0.03    0.73
   9 -11   4   28.24    1.92
  10 -11   4    0.92    0.92
  11 -11   4   57.29    2.71
  12 -11   4    0.78    1.13
  13 -11   4   -0.94    1.17
  14 -11   4    0.20    1.39
  15 -11   4    4.18    1.59
  16 -11   4    1.41    1.67
 -15 -10   4   -1.61    1.27
  14  10  -4   -0.77    1.26
 -14 -10   4    0.45    1.26
  13  10  -4    2.44    1.33
 -13 -10   4    2.05    1.28
  12  10  -4    1.71    1.16
 -12 -10   4    2.06    1.20
  11  10  -4   17.14    1.74
 -11 -10   4   26.41    1.90
  10  10  -4   -0.21    0.95
 -10 -10   4   -0.70    0.83
   9  10  -4    3.64    1.09
  -9 -10   4    3.05    0.93
   8  10  -4    0.94    0.87
  -8 -10   4    1.76    0.74
   7  10  -4    5.72    1.05
  -7 -10   4    6.68    0.86
   6  10  -4   -0.09    0.77
  -6 -10   4    0.32    0.55
   5  10  -4    1.88    0.81
  -5 -10   4    2.84    0.59
   4  10  -4    2.74    0.81
  -4 -10   4    2.10    0.50
   3  10  -4   13.67    1.20
   2  10  -4   13.74    1.18
   1  10  -4    8.53    1.03
   0  10  -4    0.62    0.62
   1 -10   4   32.19    1.65
   2 -10   4  121.93    3.37
   3 -10   4   43.81    1.91
   4 -10   4   13.15    1.20
   5 -10   4   -0.68    0.55
   6 -10   4   17.06    1.37
   7 -10   4   -0.34    0.62
   8 -10   4   19.69    1.56
   9 -10   4    0.63    0.83
  10 -10   4  143.44    4.06
  11 -10   4    1.09    1.03
  12 -10   4    7.73    1.34
  13 -10   4   -1.76    1.08
  14 -10   4    6.72    1.51
  15 -10   4   -0.99    1.36
  16 -10   4   -3.13    1.40
 -15  -9   4    1.61    1.36
  14   9  -4    6.30    1.47
 -14  -9   4    4.84    1.40
  13   9  -4   -0.02    1.11
 -13  -9   4   -0.46    1.07
  12   9  -4    0.22    1.08
 -12  -9   4    0.82    1.02
  11   9  -4   -0.49    0.98
 -11  -9   4    0.55    0.93
  10   9  -4   -0.85    0.88
 -10  -9   4    0.30    0.82
   9   9  -4   -0.61    0.82
  -9  -9   4   -1.09    0.67
   8   9  -4    6.84    1.06
  -8  -9   4    4.59    0.84
   7   9  -4    0.27    0.71
  -7  -9   4    0.91    0.58
   6   9  -4   31.08    1.65
  -6  -9   4   31.19    1.32
   5   9  -4    1.99    0.72
  -5  -9   4    3.19    0.55
   4   9  -4   55.71    2.05
  -4  -9   4   56.45    1.61
   3   9  -4    7.15    0.90
   2   9  -4   27.17    1.43
   1   9  -4    8.77    0.95
   0   9  -4    6.61    0.85
   1  -9   4    0.77    0.54
   2  -9   4    0.40    0.53
   3  -9   4    0.19    0.53
   4  -9   4    2.52    0.66
   5  -9   4   19.72    1.31
   6  -9   4    7.92    0.96
   7  -9   4    0.46    0.61
   8  -9   4    1.00    0.72
   9  -9   4   89.47    2.86
  10  -9   4    1.03    0.94
  11  -9   4   66.40    2.66
  12  -9   4    0.64    0.99
  13  -9   4    0.06    1.15
  14  -9   4   -0.01    1.23
  15  -9   4    0.52    1.37
  16  -9   4   11.05    2.13
 -16  -8   4    1.51    1.42
  15   8  -4   -0.41    1.24
 -15  -8   4   -1.36    1.18
  14   8  -4    0.08    1.16
 -14  -8   4   -0.02    1.13
  13   8  -4    7.58    1.38
 -13  -8   4    6.51    1.30
  12   8  -4    3.05    1.17
 -12  -8   4    0.75    0.95
  11   8  -4  112.73    3.56
 -11  -8   4  111.98    3.33
  10   8  -4    0.51    0.92
 -10  -8   4   -0.25    0.79
   9   8  -4   18.81    1.52
  -9  -8   4   23.40    1.49
   8   8  -4   -0.16    0.69
  -8  -8   4    0.69    0.62
   7   8  -4    5.02    0.89
  -7  -8   4    5.05    0.70
   6   8  -4   -0.09    0.60
  -6  -8   4    0.61    0.46
   5   8  -4    4.47    0.78
  -5  -8   4    4.07    0.55
   4   8  -4    0.25    0.54
  -4  -8   4    0.47    0.35
   3   8  -4    6.83    0.85
   2   8  -4    0.22    0.53
   1   8  -4    0.71    0.51
   0   8  -4   12.73    1.05
   2  -8   4   51.19    1.82
   3  -8   4    4.90    0.74
   4  -8   4   11.70    1.00
  -5   8  -4   -0.07    0.43
   5  -8   4    0.60    0.52
  -6   8  -4   28.88    1.29
   6  -8   4   28.79    1.45
  -7   8  -4    0.01    0.48
   7  -8   4    0.00    0.55
  -8   8  -4    2.93    0.63
   8  -8   4    2.78    0.75
  -9   8  -4    0.14    0.56
   9  -8   4    0.31    0.71
 -10   8  -4    9.27    0.93
  10  -8   4    8.81    1.21
 -11   8  -4   -0.02    0.67
  11  -8   4   -0.44    0.86
 -12   8  -4    3.66    0.91
  12  -8   4    5.11    1.19
 -13   8  -4    0.61    0.84
  13  -8   4   -0.68    1.03
 -14   8  -4    5.98    1.18
  14  -8   4    4.31    1.39
 -15   8  -4    1.34    1.03
  15  -8   4   -0.33    1.26
 -16   8  -4    8.98    1.46
 -17   8  -4    9.87    1.56
 -16  -7   4   -0.47    1.26
  15   7  -4    1.37    1.27
 -15  -7   4   -0.62    1.16
  14   7  -4    1.54    1.17
 -14  -7   4   -0.79    1.05
  13   7  -4    2.84    1.19
 -13  -7   4    3.07    1.13
  12   7  -4  103.74    3.48
 -12  -7   4  111.98    3.39
  11   7  -4    5.31    1.16
 -11  -7   4    7.48    1.11
  10   7  -4   63.27    2.46
 -10  -7   4   66.67    2.34
   9   7  -4    1.71    0.85
  -9  -7   4    0.63    0.65
   8   7  -4    0.70    0.68
  -8  -7   4    0.67    0.58
   7   7  -4    4.62    0.81
  -7  -7   4    2.91    0.60
   6   7  -4    0.29    0.56
  -6  -7   4    0.25    0.42
   5   7  -4    1.99    0.60
  -5  -7   4    2.66    0.47
   4   7  -4   59.05    1.91
  -4  -7   4   56.16    1.53
   3   7  -4   48.18    1.69
  -3  -7   4   50.65    1.33
   2   7  -4   25.20    1.25
   1   7  -4    2.56    0.58
   0   7  -4    8.67    0.82
  -1   7  -4   14.96    1.00
   2  -7   4   10.41    0.87
  -3   7  -4   33.81    1.23
   3  -7   4   34.09    1.39
  -4   7  -4    2.46    0.51
   4  -7   4    3.01    0.60
  -5   7  -4   21.14    1.06
   5  -7   4   19.32    1.13
  -6   7  -4    0.08    0.43
   6  -7   4    0.33    0.48
  -7   7  -4    8.59    0.76
   7  -7   4    7.44    0.86
  -8   7  -4    1.12    0.47
  -8   7  -4    1.36    0.53
   8  -7   4    1.60    0.65
  -9   7  -4   14.90    1.13
  -9   7  -4   15.30    1.08
   9  -7   4   17.80    1.40
 -10   7  -4   -0.08    0.58
 -10   7  -4    0.24    0.54
  10  -7   4    0.60    0.76
 -11   7  -4    2.79    0.69
 -11   7  -4    1.80    0.74
  11  -7   4    3.49    1.00
 -12   7  -4   -0.73    0.68
 -12   7  -4    0.90    0.65
  12  -7   4    0.54    0.97
 -13   7  -4    5.52    1.01
  13  -7   4    4.06    1.17
 -14   7  -4    0.49    0.90
  14  -7   4   -0.72    1.05
 -15   7  -4    0.99    1.05
  15  -7   4    3.16    1.36
 -16   7  -4   -1.42    1.04
 -17   7  -4    3.83    1.36
 -17  -6   4    3.35    1.52
 -16  -6   4    3.22    1.35
  15   6  -4   14.77    1.83
 -15  -6   4   14.11    1.72
  14   6  -4    3.04    1.24
 -14  -6   4    1.37    1.09
  13   6  -4   10.89    1.46
 -13  -6   4    8.07    1.29
  12   6  -4    1.79    1.06
 -12  -6   4    0.73    0.90
  11   6  -4   57.40    2.45
 -11  -6   4   56.06    2.28
  10   6  -4    2.88    0.89
 -10  -6   4    0.06    0.72
   9   6  -4    0.37    0.69
  -9  -6   4    0.91    0.63
   8   6  -4    0.21    0.62
  -8  -6   4    0.25    0.52
   7   6  -4    1.64    0.65
  -7  -6   4    2.22    0.54
   6   6  -4    6.72    0.80
  -6  -6   4    7.48    0.66
   5   6  -4  144.77    3.39
  -5  -6   4  143.40    3.10
   4   6  -4   90.76    2.39
  -4  -6   4   88.45    2.05
   3   6  -4  233.19    4.91
  -3  -6   4  233.36    4.50
   2   6  -4   42.13    1.46
   1   6  -4    3.83    0.58
   0   6  -4    2.31    0.51
  -1   6  -4    0.14    0.39
  -1   6  -4    0.15    0.34
  -2   6  -4   12.80    0.76
   2  -6   4   12.84    0.90
  -3   6  -4   13.27    0.78
   3  -6   4   12.36    0.89
  -4   6  -4  148.03    3.27
   4  -6   4  154.36    3.47
  -5   6  -4   15.05    0.85
  -5   6  -4   15.33    0.76
   5  -6   4   17.57    1.03
  -6   6  -4   22.75    1.00
  -6   6  -4   21.78    0.93
   6  -6   4   22.60    1.17
  -7   6  -4    0.96    0.44
  -7   6  -4    1.04    0.41
   7  -6   4    1.49    0.55
  -8   6  -4   38.14    1.41
  -8   6  -4   44.50    1.45
   8  -6   4   41.24    1.67
  -9   6  -4    2.03    0.55
  -9   6  -4    2.29    0.56
   9  -6   4    2.21    0.72
 -10   6  -4    5.75    0.78
 -10   6  -4    6.57    0.73
  10  -6   4    6.71    1.02
 -11   6  -4    0.45    0.58
 -11   6  -4   -0.08    0.64
  11  -6   4   -1.13    0.75
 -12   6  -4   -0.10    0.68
 -12   6  -4    0.42    0.59
  12  -6   4    0.15    0.90
 -13   6  -4    0.46    0.76
  13  -6   4   -0.86    0.94
 -14   6  -4    3.50    1.04
  14  -6   4    3.35    1.19
 -15   6  -4    5.19    1.20
  15  -6   4    5.41    1.36
 -16   6  -4    5.39    1.36
 -17   6  -4    3.34    1.29
 -17  -5   4    1.28    1.35
  16   5  -4    6.64    1.57
 -16  -5   4    8.63    1.62
  15   5  -4   -0.13    1.19
 -15  -5   4    2.69    1.17
  14   5  -4    9.83    1.51
 -14  -5   4    8.29    1.28
  13   5  -4    0.49    1.05
 -13  -5   4    0.68    0.91
  12   5  -4   -0.42    0.95
 -12  -5   4    1.23    0.86
  11   5  -4   -0.28    0.82
 -11  -5   4    0.11    0.72
  10   5  -4    1.74    0.85
 -10  -5   4    2.30    0.78
   9   5  -4    2.30    0.76
  -9  -5   4    2.15    0.67
   8   5  -4   34.40    1.62
  -8  -5   4   35.14    1.11
  -8  -5   4   35.40    1.43
   7   5  -4    8.62    0.87
  -7  -5   4    8.16    0.72
   6   5  -4    0.19    0.52
  -6  -5   4    0.44    0.39
   5   5  -4    1.19    0.52
  -5  -5   4    0.70    0.37
   4   5  -4   95.81    2.39
  -4  -5   4   92.96    2.10
   3   5  -4   33.25    1.25
  -3  -5   4   32.93    0.96
   2   5  -4    2.89    0.51
  -2  -5   4    3.50    0.32
   1   5  -4    2.40    0.47
   0   5  -4    7.31    0.62
   0   5  -4    7.35    0.57
  -1   5  -4    2.43    0.41
  -1   5  -4    3.62    0.50
  -2   5  -4    8.41    0.62
   2  -5   4    9.29    0.75
  -3   5  -4  146.71    3.10
   3  -5   4  142.86    3.20
  -4   5  -4   17.88    0.84
  -4   5  -4   17.56    0.71
   4  -5   4   18.57    0.94
  -5   5  -4  175.96    3.65
  -5   5  -4  171.27    3.51
   5  -5   4  173.61    3.78
  -6   5  -4   -0.50    0.35
  -6   5  -4    0.02    0.33
   6  -5   4    0.43    0.44
  -7   5  -4    2.52    0.44
  -7   5  -4    1.37    0.43
   7  -5   4    1.37    0.50
  -8   5  -4    1.17    0.44
  -8   5  -4    1.43    0.46
   8  -5   4    1.29    0.56
  -9   5  -4    0.60    0.49
  -9   5  -4    0.25    0.45
   9  -5   4    1.16    0.65
 -10   5  -4    1.51    0.56
 -10   5  -4    2.75    0.66
  10  -5   4    2.85    0.80
 -11   5  -4   25.65    1.25
 -11   5  -4   27.47    1.48
  11  -5   4   27.30    1.72
 -12   5  -4    7.07    0.96
 -12   5  -4    6.25    0.77
  12  -5   4    6.70    1.12
 -13   5  -4   16.08    1.34
  13  -5   4   18.10    1.61
 -14   5  -4    0.29    0.85
  14  -5   4    0.94    1.11
 -15   5  -4    7.13    1.24
  15  -5   4    3.90    2.02
 -16   5  -4    4.54    1.26
 -17   5  -4    0.51    1.20
 -18   5  -4   -1.58    1.24
 -17  -4   4   -0.11    1.23
  16   4  -4    0.60    1.32
 -16  -4   4   -0.21    1.12
  15   4  -4    4.47    1.35
 -15  -4   4    1.84    1.08
  14   4  -4    2.32    1.15
 -14  -4   4    0.32    0.98
  13   4  -4   10.23    1.40
 -13  -4   4    9.80    1.25
  12   4  -4    1.18    0.99
 -12  -4   4    2.21    0.89
  11   4  -4   16.54    1.44
 -11  -4   4   14.67    1.23
  10   4  -4    0.48    0.74
 -10  -4   4    0.18    0.61
   9   4  -4    3.14    0.80
  -9  -4   4    2.81    0.64
   8   4  -4    0.40    0.58
  -8  -4   4    0.05    0.46
  -8  -4   4    0.05    0.24
   7   4  -4   55.39    1.86
  -7  -4   4   55.58    1.66
  -7  -4   4   56.00    1.26
   6   4  -4    1.42    0.55
  -6  -4   4    1.70    0.44
   5   4  -4    1.04    0.48
  -5  -4   4    0.22    0.33
   4   4  -4   17.18    0.97
  -4  -4   4   17.68    0.75
   3   4  -4    9.53    0.78
  -3  -4   4    9.92    0.54
   2   4  -4    0.76    0.38
  -2  -4   4    1.55    0.25
   1   4  -4    9.72    0.54
   1   4  -4    9.76    0.71
  -1  -4   4    9.24    0.37
   0   4  -4   38.86    1.19
   0   4  -4   38.81    1.08
  -1   4  -4    3.02    0.40
  -1   4  -4    3.21    0.42
  -2   4  -4    9.72    0.61
   2  -4   4    9.08    0.70
  -3   4  -4   25.43    0.74
  -3   4  -4   24.79    0.89
   3  -4   4   24.47    0.98
  -4   4  -4  185.80    3.76
  -4   4  -4  186.62    3.62
   4  -4   4  182.21    3.83
  -5   4  -4    7.31    0.53
  -5   4  -4    7.73    0.59
   5  -4   4    7.44    0.65
  -6   4  -4   14.76    0.78
  -6   4  -4   13.12    0.76
   6  -4   4   14.46    0.89
  -7   4  -4    0.24    0.36
  -7   4  -4    0.73    0.39
   7  -4   4    1.65    0.50
  -8   4  -4    2.21    0.45
  -8   4  -4    0.95    0.43
   8  -4   4    1.28    0.56
  -9   4  -4   -0.28    0.44
  -9   4  -4   -0.22    0.38
   9  -4   4    0.76    0.58
 -10   4  -4   35.32    1.30
 -10   4  -4   35.00    1.50
  10  -4   4   37.00    1.71
 -11   4  -4    3.32    0.57
 -11   4  -4    4.09    0.77
  11  -4   4    3.60    0.90
 -12   4  -4   65.79    2.29
  12  -4   4   62.04    2.44
 -13   4  -4    7.17    1.02
  13  -4   4    6.74    1.24
 -14   4  -4    3.30    0.97
  14  -4   4    2.51    1.19
 -15   4  -4    1.77    1.02
 -16   4  -4    3.95    1.21
 -17   4  -4    1.08    1.27
 -18   4  -4   -1.52    1.21
 -18  -3   4   14.94    2.00
  17   3  -4   12.66    2.50
 -17  -3   4    7.95    1.59
  16   3  -4   20.87    1.97
 -16  -3   4   15.83    1.79
  15   3  -4    0.56    1.17
 -15  -3   4    1.13    1.05
  14   3  -4    1.07    1.05
 -14  -3   4   -0.78    0.87
  13   3  -4   -0.27    0.97
 -13  -3   4    0.08    0.82
  12   3  -4    2.60    1.06
 -12  -3   4    2.93    0.87
  11   3  -4   -0.15    0.80
 -11  -3   4    0.91    0.68
  10   3  -4    2.04    0.80
 -10  -3   4    1.73    0.64
   9   3  -4    0.71    0.70
  -9  -3   4    0.80    0.55
   8   3  -4    2.14    0.67
  -8  -3   4    2.63    0.55
   7   3  -4    8.29    0.83
  -7  -3   4    9.78    0.74
   6   3  -4   39.16    1.47
  -6  -3   4   41.05    1.30
   5   3  -4   25.84    1.15
  -5  -3   4   28.57    0.99
   4   3  -4   17.40    0.92
  -4  -3   4   16.68    0.73
   3   3  -4   12.79    0.79
  -3  -3   4   13.90    0.60
   2   3  -4   30.91    0.84
   2   3  -4   32.03    1.07
  -2  -3   4   31.72    0.80
   1   3  -4   37.84    0.97
   1   3  -4   36.49    1.09
  -1  -3   4   37.22    0.79
   0   3  -4   35.07    0.96
   0   3  -4   35.47    1.03
  -1   3  -4  108.68    2.33
  -1   3  -4  112.73    2.31
  -2   3  -4   28.70    0.92
  -2   3  -4   28.76    0.71
   2  -3   4   27.35    0.92
  -3   3  -4  193.62    3.69
  -3   3  -4  195.38    3.83
   3  -3   4  192.61    3.86
  -4   3  -4    1.64    0.36
  -4   3  -4    2.43    0.34
   4  -3   4    1.99    0.38
  -5   3  -4    2.61    0.41
  -5   3  -4    3.25    0.40
   5  -3   4    3.79    0.48
  -6   3  -4    1.96    0.40
  -6   3  -4    1.18    0.39
   6  -3   4    2.26    0.47
  -7   3  -4   30.49    1.13
  -7   3  -4   30.95    1.09
   7  -3   4   32.16    1.24
  -8   3  -4    0.84    0.42
  -8   3  -4    0.51    0.38
   8  -3   4    1.70    0.55
  -9   3  -4    2.22    0.54
  -9   3  -4    2.20    0.48
   9  -3   4    2.77    0.67
 -10   3  -4    3.20    0.64
 -10   3  -4    4.86    0.59
  10  -3   4    4.30    0.84
 -11   3  -4   36.16    1.66
 -11   3  -4   40.18    1.38
  11  -3   4   40.08    1.87
 -12   3  -4   13.29    1.17
  12  -3   4   14.12    1.39
 -13   3  -4   18.65    1.39
  13  -3   4   18.05    1.61
 -14   3  -4    1.73    0.96
  14  -3   4    2.13    1.12
 -15   3  -4    3.38    1.06
 -16   3  -4   -1.57    0.95
 -17   3  -4   -0.65    1.08
 -18   3  -4    8.55    1.71
 -18  -2   4   12.99    1.79
  17   2  -4   34.57    2.57
 -17  -2   4   29.50    2.31
  16   2  -4    6.65    1.46
 -16  -2   4    4.42    1.32
  15   2  -4    1.49    1.22
 -15  -2   4    2.86    1.06
  14   2  -4    0.54    1.05
 -14  -2   4    0.20    0.89
  13   2  -4   -0.15    0.96
 -13  -2   4    1.01    0.83
  12   2  -4   -0.14    0.92
 -12  -2   4    0.47    0.73
  11   2  -4   22.90    1.69
 -11  -2   4   21.93    1.46
  10   2  -4    2.87    0.88
 -10  -2   4    3.77    0.71
   9   2  -4   55.36    2.04
  -9  -2   4   53.74    1.79
   8   2  -4    5.80    0.85
  -8  -2   4    5.28    0.65
   7   2  -4    0.25    0.53
  -7  -2   4    0.55    0.42
   6   2  -4    0.65    0.50
  -6  -2   4    0.92    0.39
   5   2  -4   35.62    1.28
  -5  -2   4   35.03    1.11
   4   2  -4    1.56    0.43
  -4  -2   4    0.61    0.30
   3   2  -4    0.20    0.35
   3   2  -4    0.04    0.17
  -3  -2   4    0.07    0.25
   2   2  -4   13.62    0.47
   2   2  -4   13.89    0.69
  -2  -2   4   13.44    0.50
   1   2  -4    6.25    0.38
   1   2  -4    6.52    0.49
  -1  -2   4    5.58    0.26
   0   2  -4    9.21    0.49
   0   2  -4    8.37    0.42
  -1   2  -4   11.27    0.51
  -1   2  -4   11.48    0.35
  -1   2  -4   11.60    0.50
  -2   2  -4   32.57    0.80
  -2   2  -4   34.49    0.94
   2  -2   4   32.84    0.90
  -3   2  -4    1.09    0.33
  -3   2  -4    1.32    0.28
   3  -2   4    0.97    0.30
  -4   2  -4   30.63    0.94
  -4   2  -4   31.53    0.97
   4  -2   4   31.36    0.95
  -5   2  -4    0.22    0.31
  -5   2  -4    0.16    0.31
   5  -2   4    0.31    0.32
  -6   2  -4   34.13    1.15
  -6   2  -4   33.43    1.04
   6  -2   4   34.20    1.15
  -7   2  -4    1.51    0.41
  -7   2  -4    2.02    0.40
   7  -2   4    1.09    0.46
  -8   2  -4    4.36    0.58
  -8   2  -4    4.87    0.52
   8  -2   4    5.00    0.65
  -9   2  -4    1.19    0.41
  -9   2  -4   -0.27    0.45
   9  -2   4   -0.24    0.53
 -10   2  -4    1.83    0.61
 -10   2  -4    1.81    0.48
  10  -2   4    1.29    0.69
 -11   2  -4    0.09    0.45
 -11   2  -4    1.10    0.65
  11  -2   4    0.42    0.75
 -12   2  -4    3.75    0.85
  12  -2   4    2.85    0.99
 -13   2  -4    0.91    0.81
  13  -2   4    0.32    1.03
 -14   2  -4   -0.84    0.82
  14  -2   4   -0.11    1.31
 -15   2  -4    3.30    1.11
 -16   2  -4   -0.40    1.03
 -17   2  -4   -1.16    1.09
 -18   2  -4    2.05    1.39
 -18  -1   4   16.21    1.95
  17   1  -4    6.93    1.64
 -17  -1   4    4.93    1.43
  16   1  -4    5.86    1.45
 -16  -1   4    5.48    1.31
  15   1  -4    1.54    1.21
 -15  -1   4   -1.00    0.93
  14   1  -4   -1.62    0.99
 -14  -1   4    1.43    0.91
  13   1  -4   -1.03    0.99
 -13  -1   4   -0.33    0.76
  12   1  -4    9.92    1.33
 -12  -1   4    9.03    1.04
  11   1  -4    0.20    0.85
 -11  -1   4    0.50    0.64
  10   1  -4  148.85    3.85
 -10  -1   4  153.71    3.61
   9   1  -4    6.40    0.93
  -9  -1   4    6.59    0.75
   8   1  -4   71.07    2.17
  -8  -1   4   71.80    2.00
   7   1  -4    0.51    0.52
  -7  -1   4    0.03    0.40
   6   1  -4    0.13    0.47
  -6  -1   4    0.47    0.37
   5   1  -4    6.91    0.67
  -5  -1   4    6.14    0.51
   4   1  -4   16.31    0.91
  -4  -1   4   18.49    0.76
   3   1  -4   10.27    0.72
   3   1  -4    8.67    0.31
  -3  -1   4   10.06    0.54
   2   1  -4   89.74    1.93
   2   1  -4   87.02    1.68
  -2  -1   4   86.99    1.76
   1   1  -4   90.42    1.87
   1   1  -4   91.17    1.78
   0   1  -4   18.77    0.53
   0   1  -4   17.60    0.54
  -1   1  -4   33.43    0.76
  -1   1  -4   33.37    0.85
  -2   1  -4   15.22    0.61
   2  -1   4   14.29    0.48
  -3   1  -4   62.87    1.48
  -3   1  -4   63.63    1.44
   3  -1   4   61.92    1.34
  -4   1  -4    0.04    0.32
  -4   1  -4    0.52    0.30
   4  -1   4    0.22    0.28
  -5   1  -4    2.56    0.39
  -5   1  -4    1.89    0.38
   5  -1   4    2.43    0.40
  -6   1  -4    0.18    0.36
  -6   1  -4    0.28    0.34
   6  -1   4    0.16    0.36
  -7   1  -4   -0.34    0.37
  -7   1  -4    0.36    0.35
   7  -1   4    0.64    0.42
  -8   1  -4   -0.17    0.35
  -8   1  -4   -0.22    0.43
   8  -1   4    0.77    0.46
  -9   1  -4   14.71    1.07
  -9   1  -4   16.83    0.84
   9  -1   4   17.31    1.12
 -10   1  -4    0.19    0.53
 -10   1  -4   -0.13    0.40
  10  -1   4   -0.12    0.62
 -11   1  -4   10.16    0.98
 -11   1  -4   11.58    0.93
  11  -1   4   10.65    1.15
 -12   1  -4   -0.34    0.68
  12  -1   4   -0.87    0.84
 -13   1  -4    1.94    0.84
  13  -1   4    1.58    0.98
 -14   1  -4   -0.13    0.84
 -15   1  -4    2.28    1.04
 -16   1  -4    0.39    1.05
 -17   1  -4   -0.68    1.14
 -18   1  -4   -0.05    1.27
 -18   0   4    1.21    1.31
  17   0  -4    1.05    1.37
 -17   0   4   -1.94    1.04
  16   0  -4    0.10    1.28
 -16   0   4    0.65    1.13
  15   0  -4   11.67    1.66
 -15   0   4   11.84    1.44
  14   0  -4   -0.29    1.18
 -14   0   4    0.35    0.85
  13   0  -4   12.27    1.49
 -13   0   4   12.82    1.25
  12   0  -4   -2.05    0.90
 -12   0   4    0.61    0.70
  11   0  -4    9.35    1.19
 -11   0   4    6.38    0.88
  10   0  -4    7.57    1.05
 -10   0   4    6.96    0.82
   9   0  -4   22.06    1.41
  -9   0   4   23.10    1.24
   8   0  -4    0.12    0.56
  -8   0   4   -0.08    0.44
   7   0  -4    6.86    0.78
  -7   0   4    6.81    0.66
   6   0  -4    3.60    0.60
  -6   0   4    3.07    0.46
   5   0  -4    0.35    0.42
  -5   0   4    0.53    0.34
   4   0  -4   27.86    1.06
  -4   0   4   28.44    0.93
   3   0  -4   64.83    1.60
   3   0  -4   64.75    1.26
  -3   0   4   65.82    1.48
   2   0  -4  245.36    4.60
   2   0  -4  238.01    4.40
   1   0  -4  107.76    2.09
   1   0  -4  107.21    2.14
   0   0  -4   69.56    1.39
   0   0  -4   71.35    1.48
  -1   0  -4    3.71    0.32
  -2   0  -4   13.90    0.63
  -3   0  -4    7.72    0.59
   3   0   4    7.68    0.40
  -4   0  -4    7.13    0.53
  -4   0  -4    5.81    0.49
   4   0   4    5.86    0.49
  -5   0  -4    1.74    0.41
  -5   0  -4    1.47    0.39
   5   0   4    1.82    0.36
  -6   0  -4  186.18    3.84
  -6   0  -4  179.36    3.68
   6   0   4  184.09    3.71
  -7   0  -4    0.11    0.39
  -7   0  -4    0.81    0.39
   7   0   4   -0.19    0.39
  -8   0  -4    7.88    0.62
  -8   0  -4    7.99    0.74
   8   0   4    7.60    0.74
  -9   0  -4    2.34    0.48
  -9   0  -4    2.63    0.58
   9   0   4    2.82    0.65
 -10   0  -4   24.31    1.33
 -10   0  -4   24.87    1.05
  10   0   4   25.32    1.40
 -11   0  -4    4.15    0.78
  11   0   4    5.14    0.92
 -12   0  -4   -0.12    0.70
  12   0   4   -0.02    0.81
 -13   0  -4   -0.20    0.79
  13   0   4   -0.99    0.86
 -14   0  -4    1.66    0.99
 -15   0  -4   -0.47    0.95
 -16   0  -4    1.83    1.17
 -17   0  -4    2.77    1.41
 -18   0  -4   -3.40    1.17
  18  -1  -4    0.56    1.39
 -18   1   4   -1.43    1.16
  17  -1  -4    3.48    1.50
 -17   1   4    1.35    1.17
  16  -1  -4    1.65    1.36
 -16   1   4    3.35    1.18
  15  -1  -4    2.23    1.38
 -15   1   4    0.71    0.96
  14  -1  -4    3.90    1.29
 -14   1   4    7.05    1.11
  13  -1  -4   -0.35    1.09
 -13   1   4   -0.03    0.80
  12  -1  -4    1.25    1.03
 -12   1   4    1.16    0.74
  11  -1  -4   -0.49    0.83
 -11   1   4    0.55    0.63
  10  -1  -4    2.69    0.83
 -10   1   4    3.04    0.68
   9  -1  -4    1.25    0.70
  -9   1   4    0.51    0.51
   8  -1  -4   17.10    1.25
  -8   1   4   16.01    1.05
   7  -1  -4   13.97    1.03
  -7   1   4   13.83    0.90
   6  -1  -4   35.67    1.36
  -6   1   4   34.86    1.20
   5  -1  -4    0.49    0.42
  -5   1   4    0.57    0.35
   4  -1  -4   22.93    0.95
  -4   1   4   22.44    0.83
   2  -1  -4  113.72    2.33
   1  -1  -4   49.85    1.07
   1  -1  -4   48.40    1.11
   0  -1  -4    6.41    0.36
   0  -1  -4    6.21    0.29
  -1  -1  -4   67.87    1.29
  -2  -1  -4   -0.03    0.24
  -3  -1  -4   54.59    1.36
   3   1   4   52.34    1.12
  -4  -1  -4    3.22    0.45
   4   1   4    2.71    0.33
  -5  -1  -4  316.07    6.23
  -5  -1  -4  321.90    6.17
   5   1   4  330.10    6.06
  -6  -1  -4    0.61    0.40
  -6  -1  -4    0.72    0.42
   6   1   4    0.43    0.40
  -7  -1  -4   94.64    2.37
  -7  -1  -4   89.17    2.19
   7   1   4   97.30    2.24
  -8  -1  -4    0.58    0.43
  -8  -1  -4    0.83    0.46
   8   1   4   -0.33    0.44
  -9  -1  -4   43.25    1.39
  -9  -1  -4   43.55    1.61
   9   1   4   44.09    1.56
 -10  -1  -4    2.57    0.63
 -10  -1  -4    2.22    0.54
  10   1   4    2.91    0.69
 -11  -1  -4    3.11    0.76
  11   1   4    3.42    0.81
 -12  -1  -4    5.23    0.96
  12   1   4    8.07    1.07
 -13  -1  -4   27.26    1.92
 -14  -1  -4   17.78    1.57
 -15  -1  -4    3.30    1.17
 -16  -1  -4   -1.37    1.07
 -17  -1  -4    3.50    1.30
 -18  -1  -4    9.16    1.81
  18  -2  -4    0.53    1.48
 -18   2   4   -0.60    1.25
  17  -2  -4   -0.24    1.37
 -17   2   4   -0.06    1.14
  16  -2  -4    0.39    1.40
 -16   2   4    0.23    1.02
  15  -2  -4    1.64    1.35
 -15   2   4    1.81    1.02
  14  -2  -4    0.31    1.20
 -14   2   4    0.26    0.86
  13  -2  -4    2.03    1.26
 -13   2   4    2.11    0.86
  12  -2  -4    0.97    1.01
 -12   2   4    0.29    0.69
  11  -2  -4    4.39    1.06
 -11   2   4    4.41    0.82
  10  -2  -4    1.33    0.77
 -10   2   4   -0.01    0.55
   9  -2  -4   15.93    1.22
  -9   2   4   12.78    0.96
   8  -2  -4    2.43    0.67
  -8   2   4    1.87    0.53
   7  -2  -4   24.46    1.26
  -7   2   4   24.89    1.10
   6  -2  -4    1.32    0.49
  -6   2   4    0.91    0.41
   5  -2  -4    0.63    0.41
  -5   2   4    0.38    0.33
   4  -2  -4    1.19    0.40
   3  -2  -4    5.29    0.49
   2  -2  -4   19.71    0.72
   1  -2  -4    7.38    0.45
   0  -2  -4   20.71    0.62
  -1  -2  -4   24.36    0.73
  -1  -2  -4   23.21    0.65
  -2  -2  -4    3.48    0.36
   2   2   4    3.86    0.29
  -3  -2  -4    0.29    0.29
   3   2   4    0.02    0.23
  -4  -2  -4   44.23    1.21
   4   2   4   42.83    1.08
  -5  -2  -4    0.42    0.35
  -5  -2  -4   -0.20    0.35
   5   2   4   -0.06    0.30
  -6  -2  -4  121.94    2.70
  -6  -2  -4  119.92    2.81
   6   2   4  122.70    2.60
  -7  -2  -4    1.56    0.49
  -7  -2  -4    0.94    0.48
   7   2   4    1.84    0.45
  -8  -2  -4    0.70    0.50
  -8  -2  -4    0.24    0.46
   8   2   4    0.33    0.43
  -9  -2  -4    2.60    0.63
  -9  -2  -4    2.00    0.56
   9   2   4    2.07    0.57
 -10  -2  -4    4.54    0.76
 -10  -2  -4    5.56    0.70
  10   2   4    6.20    0.78
 -11  -2  -4    1.62    0.72
  11   2   4    2.53    0.72
 -12  -2  -4   54.99    2.22
  12   2   4   51.71    2.06
 -13  -2  -4   31.60    2.00
 -14  -2  -4   48.92    2.48
 -15  -2  -4    4.09    1.22
 -16  -2  -4   -0.69    1.15
 -17  -2  -4    6.80    1.64
  18  -3  -4    0.99    1.57
 -18   3   4   -0.35    1.19
  17  -3  -4    1.45    1.55
 -17   3   4   -0.20    1.13
  16  -3  -4   47.12    2.96
 -16   3   4   41.98    2.49
  15  -3  -4   -0.13    1.29
 -15   3   4    1.40    1.03
  14  -3  -4   36.01    2.47
 -14   3   4   36.26    2.07
  13  -3  -4    0.97    1.15
 -13   3   4    0.66    0.83
  12  -3  -4    4.89    1.16
 -12   3   4    4.57    0.95
  11  -3  -4    1.52    0.94
 -11   3   4   -0.90    0.61
  10  -3  -4    0.71    0.76
 -10   3   4    0.98    0.63
   9  -3  -4    2.09    0.75
  -9   3   4    2.80    0.63
   8  -3  -4   11.36    0.99
  -8   3   4   11.60    0.88
   7  -3  -4    5.17    0.71
  -7   3   4    5.15    0.61
   6  -3  -4   13.69    1.00
   5  -3  -4    0.17    0.39
   4  -3  -4    2.90    0.47
   3  -3  -4   25.76    0.96
   2  -3  -4    0.16    0.30
   1  -3  -4   33.32    0.98
   0  -3  -4    0.68    0.28
  -1  -3  -4   28.88    0.85
  -2  -3  -4    0.15    0.27
   2   3   4    0.14    0.28
  -3  -3  -4    6.78    0.55
   3   3   4    7.06    0.53
  -4  -3  -4    0.17    0.32
   4   3   4   -0.09    0.29
  -5  -3  -4    1.05    0.38
   5   3   4    1.07    0.36
  -6  -3  -4    0.39    0.47
  -6  -3  -4    0.81    0.39
   6   3   4    1.04    0.39
  -7  -3  -4    2.74    0.57
  -7  -3  -4    3.19    0.54
   7   3   4    2.58    0.49
  -8  -3  -4    1.65    0.53
  -8  -3  -4    2.46    0.58
   8   3   4    1.44    0.49
  -9  -3  -4   36.00    1.55
  -9  -3  -4   33.64    1.37
   9   3   4   36.01    1.38
 -10  -3  -4    1.43    0.66
 -10  -3  -4   -0.01    0.67
  10   3   4    0.15    0.56
 -11  -3  -4    1.15    0.75
  11   3   4    2.92    0.77
 -12  -3  -4    9.38    1.16
  12   3   4    8.84    1.15
 -13  -3  -4   20.89    1.63
 -14  -3  -4    8.46    1.31
 -15  -3  -4    2.68    1.19
 -16  -3  -4    1.57    1.27
 -17  -3  -4    5.22    1.53
  18  -4  -4    1.26    1.64
 -18   4   4    0.31    1.28
  17  -4  -4   15.06    2.17
 -17   4   4   14.39    1.70
  16  -4  -4    4.16    1.65
 -16   4   4    5.58    1.26
  15  -4  -4   77.33    3.39
 -15   4   4   75.31    2.86
  14  -4  -4    2.92    1.27
 -14   4   4    2.49    0.99
  13  -4  -4    0.52    1.12
 -13   4   4    0.71    0.83
  12  -4  -4    2.08    1.04
 -12   4   4    2.66    0.85
  11  -4  -4   18.15    1.51
 -11   4   4   15.61    1.22
  10  -4  -4    0.34    0.77
 -10   4   4    0.65    0.60
   9  -4  -4   25.13    1.47
  -9   4   4   25.00    1.27
   8  -4  -4   27.93    1.44
   7  -4  -4   83.94    2.34
   6  -4  -4   10.75    0.86
   5  -4  -4    3.09    0.54
   4  -4  -4   23.52    1.02
   3  -4  -4   25.98    1.01
   2  -4  -4    1.24    0.38
   1  -4  -4    1.86    0.39
   0  -4  -4   12.72    0.70
  -1  -4  -4    0.16    0.32
   2   4   4   11.80    0.66
   3   4   4    0.02    0.32
  -4  -4  -4   25.22    0.98
   4   4   4   25.30    0.94
  -5  -4  -4    0.07    0.34
   5   4   4    0.26    0.35
  -6  -4  -4   16.37    0.88
   6   4   4   16.03    0.84
  -7  -4  -4    0.38    0.39
  -7  -4  -4    0.10    0.46
   7   4   4    0.09    0.40
  -8  -4  -4    0.36    0.46
  -8  -4  -4   -0.15    0.49
   8   4   4    0.61    0.44
  -9  -4  -4    0.60    0.58
  -9  -4  -4    0.39    0.56
   9   4   4   -0.59    0.48
 -10  -4  -4   -0.28    0.61
  10   4   4    0.14    0.58
 -11  -4  -4    0.61    0.75
  11   4   4    0.83    0.70
 -12  -4  -4    3.66    0.97
 -13  -4  -4    0.94    0.91
 -14  -4  -4    2.82    1.10
 -15  -4  -4   -0.58    1.13
 -16  -4  -4    2.27    1.32
 -17  -4  -4    0.82    1.43
  18  -5  -4   -0.52    1.67
  17  -5  -4    1.50    1.55
  16  -5  -4   25.41    2.33
  15  -5  -4    2.52    1.35
  14  -5  -4    3.85    1.35
  13  -5  -4   -1.27    1.04
  12  -5  -4   24.17    1.93
  11  -5  -4    0.04    0.84
  10  -5  -4   25.79    1.71
   9  -5  -4   40.96    1.84
   8  -5  -4  144.84    3.57
   7  -5  -4   52.52    1.85
   6  -5  -4   27.68    1.27
   5  -5  -4    3.79    0.58
   4  -5  -4    9.31    0.75
   3  -5  -4    1.10    0.43
   2  -5  -4   30.31    1.13
   1  -5  -4  128.11    2.85
   0  -5  -4   54.81    1.54
  -1  -5  -4  130.84    2.87
   2   5   4    0.68    0.38
   3   5   4   43.59    1.32
   4   5   4    0.48    0.39
  -5  -5  -4   42.10    1.36
   5   5   4   40.78    1.32
  -6  -5  -4    1.56    0.47
   6   5   4    1.76    0.47
  -7  -5  -4   11.89    0.90
  -7  -5  -4   11.59    0.90
   7   5   4   13.03    0.90
  -8  -5  -4    0.17    0.48
  -8  -5  -4   -0.08    0.54
   8   5   4    0.17    0.45
  -9  -5  -4    1.14    0.66
  -9  -5  -4    0.63    0.58
   9   5   4    0.60    0.55
 -10  -5  -4   -0.47    0.68
  10   5   4   -0.05    0.59
 -11  -5  -4    7.31    1.06
  11   5   4    6.67    0.96
 -12  -5  -4    7.73    1.16
 -13  -5  -4    2.55    1.06
 -14  -5  -4    1.97    1.17
 -15  -5  -4   -0.70    1.15
 -16  -5  -4   -0.27    1.31
 -17  -5  -4   -0.14    1.36
  18  -6  -4   -2.02    1.60
  17  -6  -4    0.13    1.49
  16  -6  -4   -1.71    1.33
  15  -6  -4   -0.95    1.24
  14  -6  -4   -0.17    1.15
  13  -6  -4   22.62    1.89
  12  -6  -4    2.00    1.04
  11  -6  -4    2.38    0.96
  10  -6  -4   -0.79    0.73
   9  -6  -4   46.05    1.96
   8  -6  -4   12.22    1.06
   7  -6  -4   26.86    1.36
   6  -6  -4    2.23    0.58
   5  -6  -4   31.88    1.35
   4  -6  -4   37.76    1.42
   3  -6  -4    0.87    0.43
   2  -6  -4   54.96    1.66
   1  -6  -4   36.59    1.33
   0  -6  -4  207.60    4.37
  -1  -6  -4    6.13    0.63
   2   6   4    0.64    0.43
   3   6   4    1.14    0.48
   4   6   4   15.32    0.95
  -5  -6  -4    2.39    0.50
   5   6   4    1.90    0.51
  -6  -6  -4   39.24    1.39
   6   6   4   40.63    1.43
  -7  -6  -4    9.44    0.80
   7   6   4    8.29    0.79
  -8  -6  -4   51.79    1.72
  -8  -6  -4   51.00    1.90
   8   6   4   52.39    1.72
  -9  -6  -4    5.26    0.91
  -9  -6  -4    4.45    0.73
   9   6   4    4.21    0.74
 -10  -6  -4    0.48    0.76
  10   6   4    1.66    0.70
 -11  -6  -4    1.13    0.88
  11   6   4    1.90    0.78
 -12  -6  -4    8.26    1.22
 -13  -6  -4    0.78    1.03
 -14  -6  -4   -1.36    1.17
 -15  -6  -4    6.02    1.54
 -16  -6  -4    0.47    1.42
  17  -7  -4   -1.81    1.39
  16  -7  -4    2.38    1.55
  15  -7  -4   -0.44    1.32
  14  -7  -4    5.01    1.38
  13  -7  -4   -0.13    1.02
  12  -7  -4   -0.29    1.01
  11  -7  -4    0.95    0.95
  10  -7  -4    5.78    1.05
   9  -7  -4   -0.05    0.68
   8  -7  -4    1.52    0.66
   7  -7  -4    3.94    0.76
   6  -7  -4    2.83    0.61
   5  -7  -4   14.62    1.06
   4  -7  -4    6.75    0.77
   3  -7  -4   -0.02    0.43
   2  -7  -4   12.33    0.96
   1  -7  -4   86.21    2.32
   0  -7  -4   19.29    1.08
  -1  -7  -4   27.82    1.24
   3   7   4   40.01    1.45
   4   7   4    1.07    0.50
   5   7   4   12.90    0.97
  -6  -7  -4    0.48    0.51
   6   7   4    0.97    0.53
  -7  -7  -4  103.89    2.65
   7   7   4  101.11    2.66
  -8  -7  -4    2.04    0.75
  -8  -7  -4    3.05    0.68
   8   7   4    3.31    0.72
  -9  -7  -4   17.21    1.23
  -9  -7  -4   14.96    1.26
   9   7   4   17.81    1.27
 -10  -7  -4    0.10    0.78
  10   7   4    0.71    0.69
 -11  -7  -4    3.89    1.03
 -12  -7  -4    1.78    1.00
 -13  -7  -4   -0.21    1.08
 -14  -7  -4    4.56    1.45
 -15  -7  -4    5.55    1.64
 -16  -7  -4    7.51    1.74
  17  -8  -4    0.71    1.72
  16  -8  -4   -0.26    1.36
  15  -8  -4    0.29    1.36
  14  -8  -4   -1.24    1.17
  13  -8  -4    5.88    1.38
  12  -8  -4   -0.78    0.95
  11  -8  -4    0.70    0.95
  10  -8  -4    3.17    0.93
   9  -8  -4    2.49    0.83
   8  -8  -4    3.08    0.79
   7  -8  -4   -0.35    0.52
   6  -8  -4    2.17    0.64
   5  -8  -4    4.86    0.76
   4  -8  -4   13.74    1.06
   3  -8  -4    6.07    0.75
   2  -8  -4    5.24    0.73
   1  -8  -4    0.15    0.46
   0  -8  -4    2.60    0.62
  -1  -8  -4   -0.10    0.48
  -2  -8  -4   14.59    1.05
   3   8   4    0.29    0.52
   4   8   4    6.06    0.75
   5   8   4    0.97    0.58
   6   8   4   23.65    1.38
  -7  -8  -4    3.61    0.73
   7   8   4    4.65    0.81
  -8  -8  -4   16.02    1.26
  -8  -8  -4   15.08    1.20
   8   8   4   17.41    1.29
  -9  -8  -4    0.87    0.81
  -9  -8  -4   -0.13    0.72
   9   8   4    2.28    0.76
 -10  -8  -4    0.06    0.85
  10   8   4    0.21    0.74
 -11  -8  -4    0.38    0.91
 -12  -8  -4   -0.61    0.97
 -13  -8  -4    2.63    1.25
 -14  -8  -4    6.82    1.51
 -15  -8  -4   28.80    2.38
  17  -9  -4   -1.56    1.56
[truncated: 951,866 more chars]
